# Supplementary material for: A New Strategy for the Old Challenge of Thalidomide: Systems Biology Prioritization of Potential Immunomodulatory Drug (IMiD)-Targeted Transcription Factors
Source: MDPI journal article supplement (doi:10.3390/ijms241411515), 2023-07-15
Supplement: s1 [file s1]

**Figure S1:** Network of the proteins obtained with the literature review, without topological analysis;

**Figure S2:** Venn Diagram comprising the genes differentially expressed only one time (red) and at least two times (blue), and the IMiD-affected genes, according to the literature review (green);

**Table S1:** Complete literature review annotations;

**Table S2:** Network statistics for the proteins obtained with the literature review;

**Table S3:** Topological analysis for the proteins obtained with the literature review;

**Table S4:** Details of the transcriptome datasets included in the study;

**Table S5:** Complete list of genes differentially expressed;

**Table S6:** Description of gene functions for the genes more times differentially expressed;

**Table S7:** Gene set enrichment analysis for the differentially expressed genes;

**Table S8:** Gene ontology overrepresentation analysis for the C2H2 TFs suggested by TRRUST database; Supplemental Material 1: Literature review search terms.
