# Supplementary material for: A New Strategy for the Old Challenge of Thalidomide: Systems Biology Prioritization of Potential Immunomodulatory Drug (IMiD)-Targeted Transcription Factors
Source: MDPI journal article supplement (doi:10.3390/ijms241411515), 2023-07-15
Supplement: s1 [file s1]

**PubMed:****Drug**

Thalidomide[Mh] OR Thalidomide[Tiab] OR Sedoval[Tiab] OR Thalomid[Tiab] OR pomalidomide[Tiab] OR Lenalidomide[Mh] OR Lenalidomide[Tiab] OR Revlimid[Tiab] OR Revimid[Tiab]

AND

**Molecular alteration (gene ou protein)**

Transcriptome[Tiab] OR Transcriptome\*[Tiab] OR Transcriptome Profile\*[Tiab] OR Microarray Analysis[Mh] OR Microarray Analysis[Tiab] OR Epigenome[Mh] OR Epigenome\*[Tiab] OR DNA Methylome\*[Tiab] OR Methylome\*[Tiab] OR Epigenomics[Mh] OR Epigenomic\*[Tiab] OR Proteome[Mh] OR Proteome\*[Tiab] OR Gene Expression[Mh] OR Gene Expression\*[Tiab] OR Gene Expression Profiling[Mh] OR Gene Expression Profiling\*[Tiab] OR Developmental Gene Expression Regulation\*[Tiab] OR Embryologic Gene Expression Regulation\*[Tiab] OR Gene Expression Regulation[Mh] OR Gene Expression Regulation\*[Tiab] OR Transcriptome Profiling\*[Tiab] OR Polymerase Chain Reaction[Mh] OR Polymerase Chain Reaction[Tiab] OR PCR[Tiab] OR Nested PCR[Tiab] OR Real-Time Polymerase Chain Reaction[Mh] OR Real-Time Polymerase Chain Reaction[Tiab] OR Real-Time PCR[Tiab] OR Real Time PCR[Tiab] OR Quantitative Real-Time Polymerase Chain Reaction[Tiab] OR Quantitative Real Time Polymerase Chain Reaction[Tiab] OR Quantitative Real-Time PCR[Tiab] OR Protein expression\*[Tiab] OR Quantitative assay\*[Tiab] OR In Situ Hybridization[Mh] OR In Situ Hybridization[Tiab] OR Hybridization in Situ[Tiab]

AND

**Embryonic model**

Stem Cells[Mh] OR Stem Cells\*[Tiab] OR Progenitor Cells[Tiab] OR Mother Cells[Tiab] OR Induced Pluripotent Stem Cells[Mh] OR Induced Pluripotent Stem Cell\*[Tiab] OR IPS Cells\*[Tiab] OR Human Induced Pluripotent Stem Cell\*[Tiab] OR hiPSC\*[Tiab] OR Fibroblast-Derived Induced Pluripotent Stem Cell\*[Tiab] OR Fibroblast-Derived IPS Cell\*[Tiab] OR Fibroblast Derived IPS Cells\*[Tiab] OR Fetal Stem Cells[Mh] OR Fetal Stem Cell\*[Tiab] OR Hematopoietic Stem Cells[Mh] OR Hematopoietic Stem Cell\*[Tiab] OR Hematopoietic Progenitor Cell\*[Tiab] OR Lymphoid Progenitor Cells[Mh] OR Lymphoid Progenitor Cell\*[Tiab] OR Lymphoid Stem Cell\*[Tiab] OR Myeloid Progenitor Cells[Mh] OR Myeloid Progenitor Cell\*[Tiab] OR Myeloid Stem Cell\*[Tiab] OR Neural Stem Cells[Mh] OR Neural Stem Cell\*[Tiab] OR Multipotent Stem Cells[Mh] OR Multipotent Stem Cell\*[Tiab] OR Mesenchymal Stem Cells[Mh] OR Mesenchymal Stem Cell\*[Tiab] OR Bone Marrow Mesenchymal Stem Cell\*[Tiab] OR Bone Marrow Stromal Cell\*[Tiab] OR Multipotent Bone Marrow Stromal Cell\*[Tiab] OR Adipose-Derived Mesenchymal Stem Cell\*[Tiab] OR Adipose Derived Mesenchymal Stem Cell\*[Tiab] OR Adipose Tissue-Derived Mesenchymal Stem Cell\*[Tiab] OR Adipose Tissue Derived Mesenchymal Stem Cell\*[Tiab] OR Mesenchymal Stromal Cell\*[Tiab] OR Multipotent Mesenchymal Stromal Cell\*[Tiab] OR Mesenchymal Progenitor Cell\*[Tiab] OR Wharton Jelly Cell\*[Tiab] OR Wharton's Jelly Cell\*[Tiab] OR Pluripotent Stem Cells[Mh] OR Pluripotent Stem Cell\*[Tiab] OR Embryonic Stem Cells[Mh] OR Embryonic Stem Cell\*[Tiab] OR Human Embryonic Stem Cells[Mh] OR Human Embryonic Stem Cell\*[Tiab] OR hESC\*[Tiab] OR H1-hESC\*[Tiab] OR H9-hESC\*[Tiab] OR Totipotent Stem Cells[Mh] OR Totipotent Stem Cell\*[Tiab] OR Human Umbilical Vein Endothelial Cells[Mh] OR Human Umbilical Vein Endothelial Cell\*[Tiab] OR HUVEC Cell\*[Tiab] OR Embryoid Bodies[Mh] OR Embryoid Bod\*[Tiab]

**EMBASE:****Drug**

‘Thalidomide’/exp OR ‘Sedoval’/exp OR ‘Thalomid’/exp OR ‘pomalidomide’/exp OR ‘Lenalidomide’/exp OR ‘Revlimid’/exp OR ‘Revimid’/exp

AND

### **Molecular alteration (gene ou protein)**

‘Transcriptome’/exp OR ‘Transcriptomes’/exp OR ‘Transcriptome Profile’/exp OR ‘Transcriptome Profiles’/exp OR ‘Microarray Analysis’/exp OR ‘Microarray Analyzes’/exp OR ‘Epigenome’/exp OR ‘Epigenomes’/exp OR ‘DNA Methylome’/exp OR ‘DNA Methylomes’/exp OR ‘Methylome’/exp OR ‘Methylomes’/exp OR ‘Epigenomics’/exp OR ‘Epigenomic’/exp OR ‘Proteome’/exp OR ‘Proteomes’/exp OR ‘Gene Expression’/exp OR ‘Gene Expression Profiling’/exp OR ‘Developmental Gene Expression Regulation’/exp OR ‘Embryologic Gene Expression Regulation’/exp OR ‘Gene Expression Regulation’/exp OR ‘Transcriptome Profiling’/exp OR ‘Polymerase Chain Reaction’/exp OR ‘PCR’/exp OR ‘Nested PCR’/exp OR ‘Real-Time Polymerase Chain Reaction’/exp OR ‘Real-Time PCR’/exp OR ‘Real Time PCR’/exp OR ‘Quantitative Real-Time Polymerase Chain Reaction’/exp OR ‘Quantitative Real Time Polymerase Chain Reaction’/exp OR ‘Quantitative Real-Time PCR’/exp OR ‘Protein expression’/exp OR ‘Quantitative assay’/exp OR ‘In Situ Hybridization’/exp OR ‘Hybridization in Situ’/exp

AND

### **Embryonic model**

‘Stem Cell\*’/exp OR ‘Progenitor Cell\*’/exp OR ‘Mother Cell\*’/exp OR ‘Induced Pluripotent Stem Cell\*’/exp OR ‘IPS Cell\*’/exp OR ‘Human Induced Pluripotent Stem Cell\*’/exp OR ‘hiPSC\*’/exp OR ‘Fibroblast-Derived Induced Pluripotent Stem Cell\*’/exp OR ‘Fibroblast-Derived IPS Cell\*’/exp OR ‘Fibroblast Derived IPS Cell\*’/exp OR ‘Fetal Stem Cell\*’/exp OR ‘Hematopoietic Stem Cell\*’/exp OR ‘Hematopoietic Progenitor Cell\*’/exp OR ‘Lymphoid Progenitor Cell\*’/exp OR ‘Lymphoid Stem Cell\*’/exp OR ‘Myeloid Progenitor Cell\*’/exp OR ‘Myeloid Stem Cell\*’/exp OR ‘Neural Stem Cell\*’/exp OR ‘Multipotent Stem Cell\*’/exp OR ‘Mesenchymal Stem Cell\*’/exp OR ‘Bone Marrow Mesenchymal Stem Cell\*’/exp OR ‘Bone Marrow Stromal Cell\*’/exp OR ‘Multipotent Bone Marrow Stromal Cell\*’/exp OR ‘Adipose-Derived Mesenchymal Stem Cell\*’/exp OR ‘Adipose Derived Mesenchymal Stem Cell\*’/exp OR ‘Adipose Tissue-Derived Mesenchymal Stem Cell\*’/exp OR ‘Adipose Tissue Derived Mesenchymal Stem Cell\*’/exp OR ‘Mesenchymal Stromal Cell\*’/exp OR ‘Multipotent Mesenchymal Stromal Cell\*’/exp OR ‘Mesenchymal Progenitor Cell\*’/exp OR ‘Wharton Jelly Cell\*’/exp OR ‘Pluripotent Stem Cells\*’/exp OR ‘Embryonic Stem Cells\*’/exp OR ‘Embryonic Stem Cell\*’/exp OR ‘Human Embryonic Stem Cells\*’/exp OR ‘hESC\*’/exp OR ‘H1-hESC\*’/exp OR ‘H9-hESC\*’/exp OR ‘Totipotent Stem Cell\*’/exp OR ‘Human Umbilical Vein Endothelial Cell\*’/exp OR ‘HUVEC Cell\*’/exp OR ‘Embryoid Bodies’/exp OR ‘Embryoid Bod\*’/exp
