# Supplementary material for: A New Strategy for the Old Challenge of Thalidomide: Systems Biology Prioritization of Potential Immunomodulatory Drug (IMiD)-Targeted Transcription Factors
Source: Int J Mol Sci. 2023 Jul 15;24(14):11515. doi: 10.3390/ijms241411515 (PMC10380514; doi:10.3390/ijms241411515)
Supplement: Supplementary file 1 [file ijms-24-11515-s001.zip]

Archive with 12 entries (12 files):
- Kowalski et al., 2023 - Figure S1.pdf
- Kowalski et al., 2023 - Figure S2.jpg
- Kowalski et al., 2023 - Supplemental Material 1.pdf
- Kowalski et al., 2023 - Table S1.xlsx
- Kowalski et al., 2023 - Table S2.xlsx
- Kowalski et al., 2023 - Table S3.xlsx
- Kowalski et al., 2023 - Table S4.xlsx
- Kowalski et al., 2023 - Table S5.xlsx
- Kowalski et al., 2023 - Table S6.xlsx
- Kowalski et al., 2023 - Table S7.xlsx
- Kowalski et al., 2023 - Table S8.xlsx
- Supplemental  Figures and Tables legends.pdf
