# Supplementary material for: A New Strategy for the Old Challenge of Thalidomide: Systems Biology Prioritization of Potential Immunomodulatory Drug (IMiD)-Targeted Transcription Factors
Source: Int J Mol Sci. 2023 Jul 15;24(14):11515. doi: 10.3390/ijms241411515 (PMC10380514; doi:10.3390/ijms241411515)
Supplement: Supplementary file 1 [file ijms-24-11515-s001.zip › Kowalski et al., 2023 - Table S1.xlsx]

## Sheet: Planilha1
PMID	Source	Drug	Species	CellTissue	Level	GeneProt	Type of interaction
19840843	CTD	thalidomide	human	trophoblast cells	protein	ABCB1	downregulation
19840843	CTD	thalidomide	human	trophoblast cells	protein	ABCB1	reduced activity
20561110	Literature	thalidomide	human	hESC (H9)	gene	ACTC1	downregulation
33763605	Literature	thalidomide	human	hiPSC mesoderm differentiated	gene	ACTC1	downregulation
33763605	Literature	thalidomide	human	hiPSC	gene	ACTC1	downregulation
22952932	Literature	thalidomide	human	hESC	gene	ADAMTS1	downregulation
22952932	Literature	thalidomide	human	hESC	gene	AFP	downregulation
33763605	Literature	thalidomide	human	hiPSC mesoderm differentiated	gene	AICDA	upregulation
33763605	Literature	thalidomide	human	hiPSC	gene	AICDA	upregulation
25326112	Pubtator	thalidomide	human	HUVEC	gene	AKT1	phosphorylation inhibition
15797261	Pubtator	lenalidomide	human	HUVEC	protein	AKT1	phosphorylation inhibition
18178729	Pubtator	thalidomide	human	embryonic fibroblast	protein	AKT1	downregulation
18805433	Pubtator	lenalidomide	human	HUVEC	protein	AKT1	phosphorylation inhibition
20561110	Literature	thalidomide	human	hESC (H9)	gene	ALB	upregulation
31711903	CTD	thalidomide	human	HESCA	gene	ALDH1A2	downregulation
L365420230	Embase	thalidomide	human	HUVEC	gene	ANG2	downregulation
33206273	Literature	thalidomide	human	HUVEC	protein	ANG2	downregulation
L365420230	Embase	thalidomide	human	HUVEC	protein	ANG2	downregulation
22952932	Literature	thalidomide	human	hESC	gene	ANGPT1	downregulation
24219762	Literature	thalidomide	human	HUVEC	protein	ANGPT2	downregulation
33206273	Pubtator	thalidomide	human	HUVEC	protein	ANGPT2	downregulation
19954599	CTD	thalidomide	human	HMEC-1	gene	ANXA2	downregulation
19954599	CTD	thalidomide	human	HMEC-1	protein	ANXA2	downregulation
22952932	Literature	thalidomide	human	hESC	gene	APOA4	downregulation
20561110	Literature	thalidomide	human	hESC (H9)	gene	APOA4	downregulation
22952932	Literature	thalidomide	human	hESC	gene	APOB	downregulation
20561110	Literature	thalidomide	human	hESC (H9)	gene	APOC1	downregulation
22952932	Literature	thalidomide	human	hESC	gene	APOE	downregulation
20561110	Literature	thalidomide	human	hESC (H9)	gene	APOH	upregulation
33445986	Literature	pomalidomide	human	embryoid body	protein	ARFGAP1	protein degradation
33445986	Literature	pomalidomide	human	embryoid body	protein	ATP5PD	protein degradation
22952932	Literature	thalidomide	human	hESC	gene	AXIN2	downregulation
22710762	Pubtator	thalidomide	human	cord blood	protein	BCL2	upregulation
11297551	Pubtator	thalidomide	human	HUVEC	gene	BCL2A1	downregulation
11297551	Pubtator	thalidomide	human	HUVEC	gene	BIRC3	downregulation
33763605	Literature	thalidomide	human	hiPSC	gene	BMP2	upregulation
22952932	Literature	thalidomide	human	hESC	gene	BMPR1B	downregulation
22952932	Literature	thalidomide	human	hESC	gene	BNC1	downregulation
32756504	Literature	thalidomide	human	hESC (neuronal diff)	gene	CACNB4	downregulation
24154490	CTD	thalidomide	human	hPSC	gene	CALB1	downregulation
24154490	Literature	thalidomide	human	hPSC	gene	CALB1	downregulation
18805433	Pubtator	lenalidomide	human	HUVEC	protein	CD31	molecule association
33763605	Literature	thalidomide	human	hiPSC mesoderm differentiated	gene	CD34	downregulation
33763605	Literature	thalidomide	human	hiPSC mesoderm differentiated	gene	CDH1	downregulation
31404653	Literature	thalidomide	human	human iPSCs	gene	CDH5	downregulation
18805433	Pubtator	lenalidomide	human	HUVEC	protein	CDH5	molecule association
32756504	Literature	thalidomide	human	hESC (neuronal diff)	gene	CDH6	upregulation
33147516	CTD	thalidomide	human	embryoid body from hiPSC	gene	CDH9	downregulation
33147516	CTD	thalidomide	human	embryoid body from hiPSC	gene	CDX2	upregulation
20561110	Literature	thalidomide	human	hESC (H9)	gene	CFI	upregulation
20561110	Literature	thalidomide	human	hESC (H9)	gene	CHN1	upregulation
22952932	Literature	thalidomide	human	hESC	gene	COL5A2	downregulation
22952932	Literature	thalidomide	human	hESC	gene	COL6A3	downregulation
20561110	Literature	thalidomide	human	hESC (H9)	gene	CP	upregulation
32756504	Literature	thalidomide	human	hESC (neuronal diff)	gene	CPLX3	downregulation
20223979	Pubtator	thalidomide	human	HEK293T	protein	CRBN	activity inhibition
25043012	CTD	thalidomide	human	HEK293T	protein	CRBN	binding
25043012	CTD	lenalidomide	human	HEK293T	protein	CRBN	binding
25043012	CTD	pomalidomide	human	HEK293T	protein	CRBN	binding
30067223	CTD	thalidomide	human	hESC	protein	CRBN	binding
30067223	CTD	lenalidomide	human	hESC	protein	CRBN	binding
30067223	CTD	pomalidomide	human	hESC	protein	CRBN	binding
32677118	Literature	thalidomide	human	HUVEC	protein	CRBN	upregulation
32677118	Literature	lenalidomide	human	HUVEC	protein	CRBN	upregulation
33445986	Literature	pomalidomide	human	human iPSCs	protein	CRBN	increased abundance
33445986	Literature	pomalidomide	human	embryoid body	protein	CRBN	increased abundance
22952932	Literature	thalidomide	human	hESC	gene	CREB1	downregulation
32756504	Literature	thalidomide	human	hESC (neuronal diff)	gene	CREB5	downregulation
30067223	CTD	lenalidomide	human	hESC	protein	CSNK1A1	protein degradation
33445986	Literature	pomalidomide	human	human iPSCs	protein	CSNK1A1	protein degradation
33445986	Literature	pomalidomide	human	embryoid body	protein	CSNK1A1	protein degradation
34498102	Pubtator	lenalidomide	human	HEK293T	protein	CSNK1A1	protein degradation
17283219	Pubtator	thalidomide	human	embryonic fibroblast	protein	CTNNB1	blocks activity
18178729	Pubtator	thalidomide	human	embryonic fibroblast	protein	CTNNB1	downregulation
18805433	Pubtator	lenalidomide	human	HUVEC	protein	CTNNB1	molecule association
22952932	Literature	thalidomide	human	hESC	protein	CTNNB1	downregulation
25043012	CTD	thalidomide	human	HEK293T	protein	CUL4A	binding through CRBN
25043012	CTD	lenalidomide	human	HEK293T	protein	CUL4A	binding through CRBN
25043012	CTD	pomalidomide	human	HEK293T	protein	CUL4A	binding through CRBN
30067223	CTD	thalidomide	human	hESC	protein	CUL4A	binding through CRBN
30067223	CTD	pomalidomide	human	hESC	protein	CUL4A	binding through CRBN
28496040	CTD	thalidomide	human	placenta	gene	CYP2B6	upregulation
28496040	CTD	thalidomide	human	placenta	gene	CYP3A4	upregulation
28745489	CTD	thalidomide	human	HUVEC	protein	CYP3A4	metabolism
28496040	CTD	thalidomide	human	placenta	gene	CYP3A5	upregulation
28745489	CTD	thalidomide	human	HUVEC	protein	CYP3A5	metabolism
22952932	Literature	thalidomide	human	hESC	gene	DCN	downregulation
22952932	Literature	thalidomide	human	hESC	gene	DDAH2	downregulation
25043012	CTD	thalidomide	human	HEK293T	protein	DDB1	binding through CRBN
25043012	CTD	lenalidomide	human	HEK293T	protein	DDB1	binding through CRBN
25043012	CTD	pomalidomide	human	HEK293T	protein	DDB1	binding through CRBN
30067223	CTD	thalidomide	human	hESC	protein	DDB1	binding through CRBN
30067223	CTD	pomalidomide	human	hESC	protein	DDB1	binding through CRBN
22952932	Literature	thalidomide	human	hESC	gene	DICER1	downregulation
L365420230	Embase	thalidomide	human	HUVEC	gene	DLL4	downregulation
24219762	Literature	thalidomide	human	HUVEC	protein	DLL4	downregulation
L365420230	Embase	thalidomide	human	HUVEC	protein	DLL4	downregulation
30067223	CTD	pomalidomide	human	hESC	protein	DTWD1	protein degradation
33445986	Literature	pomalidomide	human	human iPSCs	protein	DTWD1	protein degradation
33445986	Literature	pomalidomide	human	embryoid body	protein	DTWD1	protein degradation
22952932	Literature	thalidomide	human	hESC	gene	E2F7	downregulation
22952932	Literature	thalidomide	human	hESC	gene	EDNRA	downregulation
22952932	Literature	thalidomide	human	hESC	gene	EFNB2	downregulation
27047649	Pubtator	thalidomide	human	umbilical cord blood CD133+ cells	gene	EKLF	upregulation
33763605	Literature	thalidomide	human	hiPSC mesoderm differentiated	gene	EMX2	upregulation
20561110	Literature	thalidomide	human	hESC (H9)	gene	ENC1	upregulation
32756504	Literature	thalidomide	human	hESC (neuronal diff)	gene	EPHB1	downregulation
28745489	CTD	thalidomide	human	HUVEC	protein	ERBB2	susceptibility
22952932	Literature	thalidomide	human	hESC	gene	ERBB3	downregulation
31711903	CTD	thalidomide	human	HESCA	gene	EYA1	downregulation
21159364	Literature	thalidomide	human	HUVEC	protein	F3	increased activity
21159364	Literature	lenalidomide	human	HUVEC	protein	F3	increased activity
20561110	Literature	thalidomide	human	hESC (H9)	gene	FABP1	upregulation
22705469	Literature	lenalidomide	human	MSC	gene	FABP4	upregulation
22952932	Literature	thalidomide	human	hESC	gene	FABP7	downregulation
33763605	Literature	thalidomide	human	hiPSC mesoderm differentiated	gene	FABP7	upregulation
33763605	Literature	thalidomide	human	hiPSC	gene	FABP7	downregulation
20561110	Literature	thalidomide	human	hESC (H9)	gene	FABP7	upregulation
30067223	CTD	lenalidomide	human	hESC	protein	FAM83F	protein degradation
30067223	CTD	pomalidomide	human	hESC	protein	FAM83F	protein degradation
18178729	Pubtator	thalidomide	human	embryonic fibroblast	protein	FAS	upregulation
33147516	CTD	thalidomide	human	embryoid body from hiPSC	gene	FCN3	downregulation
20561110	Literature	thalidomide	human	hESC (H9)	gene	FEZ1	upregulation
22952932	Literature	thalidomide	human	hESC	gene	FGA	downregulation
33763605	Literature	thalidomide	human	hiPSC mesoderm differentiated	gene	FGF4	downregulation
31711903	CTD	thalidomide	human	HESCA	gene	FGF8	upregulation
30834740	CTD	thalidomide	human	HUVEC	gene	FGFR1	upregulation
30834740	CTD	lenalidomide	human	HUVEC	gene	FGFR1	upregulation
30834740	CTD	thalidomide	human	HUVEC	gene	FGFR2	downregulation
30834740	CTD	lenalidomide	human	HUVEC	gene	FGFR2	downregulation
30834740	CTD	thalidomide	human	HUVEC	protein	FGFR2	downregulation
30834740	CTD	lenalidomide	human	HUVEC	protein	FGFR2	downregulation
30834740	CTD	thalidomide	human	HUVEC	gene	FGFR3	downregulation
22952932	Literature	thalidomide	human	hESC	gene	FIGF	downregulation
15741222	Literature	thalidomide	human	HUVEC	protein	FLK1	downregulation
15741222	Pubtator	thalidomide	human	HUVEC	protein	FLK1	downregulation
33763605	Literature	thalidomide	human	hiPSC mesoderm differentiated	gene	FOXA2	downregulation
31711903	CTD	thalidomide	human	HESCA	gene	FOXC2	downregulation
33763605	Literature	thalidomide	human	hiPSC mesoderm differentiated	gene	FOXD3	downregulation
22952932	Literature	thalidomide	human	hESC	gene	FRZB	downregulation
22952932	Literature	thalidomide	human	hESC	gene	FST	downregulation
24154490	CTD	thalidomide	human	hPSC	gene	FZD8	downregulation
24154490	Literature	thalidomide	human	hPSC	gene	FZD8	downregulation
27047649	Pubtator	thalidomide	human	umbilical cord blood CD133+ cells	gene	GATA1	upregulation
31404653	Literature	thalidomide	human	human iPSCs	gene	GATA1	upregulation
22952932	Literature	thalidomide	human	hESC	gene	GATA4	downregulation
22952932	Literature	thalidomide	human	hESC	gene	GATA6	downregulation
33147516	CTD	thalidomide	human	embryoid body from hiPSC	gene	GATA6	upregulation
33763605	Literature	thalidomide	human	hiPSC mesoderm differentiated	gene	GJB2	upregulation
20561110	Literature	thalidomide	human	hESC (H9)	gene	GPX2	downregulation
22952932	Literature	thalidomide	human	hESC	gene	GREM1	downregulation
32756504	Literature	thalidomide	human	hESC (neuronal diff)	gene	GRIA3	downregulation
32756504	Literature	thalidomide	human	hESC (neuronal diff)	gene	GRIA4	upregulation
32756504	Literature	thalidomide	human	hESC (neuronal diff)	gene	GRIN2A	downregulation
17283219	Pubtator	thalidomide	human	embryonic fibroblast	protein	GS3KB	activation
22952932	Literature	thalidomide	human	hESC	gene	GSTA1	downregulation
22952932	Literature	thalidomide	human	hESC	protein	GSTA1	downregulation
22952932	Literature	thalidomide	human	hESC	protein	GSTA2	downregulation
19912234	Pubtator	thalidomide	human	HUVEC	protein	GUCY1A1	activity
19912234	Pubtator	thalidomide	human	HUVEC	protein	GUCY1A2	activity
19912234	Pubtator	thalidomide	human	HUVEC	protein	GUCY1B1	activity
31404653	Literature	thalidomide	human	human iPSCs	gene	GYPA	upregulation
33445986	Literature	pomalidomide	human	embryoid body	protein	GZF1	protein degradation
33445986	Literature	pomalidomide	human	embryoid body	protein	GZF1	decreased stability
22952932	Literature	thalidomide	human	hESC	gene	HAND1	downregulation
33147516	CTD	thalidomide	human	embryoid body from hiPSC	gene	HAND1	upregulation
33763605	Literature	thalidomide	human	hiPSC mesoderm differentiated	gene	HAND1	downregulation
22952932	Literature	thalidomide	human	hESC	gene	HAND2	downregulation
33147516	CTD	thalidomide	human	embryoid body from hiPSC	gene	HAND2	upregulation
28469241	Pubtator	thalidomide	human	HEK293T	protein	HAND2	binding through TBX5
31404653	Literature	thalidomide	human	human iPSCs	gene	HBE1	upregulation
31404653	Literature	thalidomide	human	human iPSCs	gene	HBG1	upregulation
22952932	Literature	thalidomide	human	hESC	gene	HES5	downregulation
33147516	CTD	thalidomide	human	embryoid body from hiPSC	gene	HESX1	downregulation
20561110	Literature	thalidomide	human	hESC (H9)	gene	HGD	upregulation
L365420230	Embase	thalidomide	human	HUVEC	gene	HIF1A	downregulation
18805433	Pubtator	lenalidomide	human	HUVEC	protein	HIF1A	downregulation
19576118	Pubtator	thalidomide	human	HUVEC	protein	HIF1A	downregulation
22098296	Literature	thalidomide	human	HUVEC	protein	HIF1A	downregulation
24219762	Literature	thalidomide	human	HUVEC	protein	HIF1A	downregulation
27249651	Literature	thalidomide	human	HUVEC	protein	HIF1A	downregulation
L365420230	Embase	thalidomide	human	HUVEC	protein	HIF1A	downregulation
27249651	Literature	thalidomide	human	HUVEC	protein	HIF2A	downregulation
22952932	Literature	thalidomide	human	hESC	gene	HMGCR	downregulation
20561110	Literature	thalidomide	human	hESC (H9)	gene	HMOX1	downregulation
33147516	CTD	thalidomide	human	embryoid body from hiPSC	gene	HNF1B	upregulation
33147516	CTD	thalidomide	human	embryoid body from hiPSC	gene	HNF4A	downregulation
33763605	Literature	thalidomide	human	hiPSC mesoderm differentiated	gene	HNF4A	downregulation
22952932	Literature	thalidomide	human	hESC	gene	HOXA10	downregulation
22952932	Literature	thalidomide	human	hESC	gene	HOXA5	downregulation
22952932	Literature	thalidomide	human	hESC	gene	HOXA7	downregulation
22952932	Literature	thalidomide	human	hESC	gene	HOXA9	downregulation
22952932	Literature	thalidomide	human	hESC	gene	HOXB3	downregulation
22952932	Literature	thalidomide	human	hESC	gene	HOXB6	downregulation
31711903	CTD	thalidomide	human	HESCA	gene	HOXB7	upregulation
22952932	Literature	thalidomide	human	hESC	gene	HOXB8	downregulation
22952932	Literature	thalidomide	human	hESC	gene	HOXB9	downregulation
31711903	CTD	thalidomide	human	HESCA	gene	HOXB9	upregulation
22952932	Literature	thalidomide	human	hESC	gene	HOXC6	downregulation
22952932	Literature	thalidomide	human	hESC	gene	HOXC9	downregulation
22952932	Literature	thalidomide	human	hESC	gene	HOXD4	downregulation
20561110	Literature	thalidomide	human	hESC (H9)	gene	HSPB8	downregulation
11838958	Pubtator	thalidomide	human	HUVEC	protein	ICAM1	downregulation
22710762	Pubtator	thalidomide	human	cord blood	protein	IFNG	upregulation
22952932	Literature	thalidomide	human	hESC	gene	IGF2	downregulation
22952932	Literature	thalidomide	human	hESC	gene	IGFBP3	downregulation
30234487	Pubtator	pomalidomide	human	293T cells (embryo kidney)	protein	IKZF1	downregulation
30234487	Pubtator	pomalidomide	human	293T cells (embryo kidney)	protein	IKZF3	downregulation
22710762	Pubtator	thalidomide	human	cord blood	protein	IL2	upregulation
11297551	Pubtator	thalidomide	human	HUVEC	gene	IL2RA	downregulation
22710762	Pubtator	thalidomide	human	cord blood	protein	IL6	downregulation
11297551	Pubtator	thalidomide	human	HUVEC	gene	IL8	downregulation
14558594	Pubtator	thalidomide	human	HUVEC	protein	IL8	downregulation
22710762	Pubtator	thalidomide	human	cord blood	protein	IL8	downregulation
22952932	Literature	thalidomide	human	hESC	gene	INS-IGF2	downregulation
18178729	Pubtator	thalidomide	human	embryonic fibroblast	gene	IRS2	upregulation
22952932	Literature	thalidomide	human	hESC	gene	ISL1	downregulation
11838958	Pubtator	thalidomide	human	HUVEC	protein	ITGB2	downregulation
20561110	Literature	thalidomide	human	hESC (H9)	gene	ITIH2	upregulation
32756504	Literature	thalidomide	human	hESC (neuronal diff)	gene	KALRN	downregulation
31404653	Literature	thalidomide	human	human iPSCs	gene	KLF	upregulation
22952932	Literature	thalidomide	human	hESC	gene	KPNA2	downregulation
22952932	Literature	thalidomide	human	hESC	gene	KRAS	downregulation
22952932	Literature	thalidomide	human	hESC	gene	KRT18	downregulation
22952932	Literature	thalidomide	human	hESC	gene	KRT19	downregulation
20561110	Literature	thalidomide	human	hESC (H9)	gene	LCP1	downregulation
22952932	Literature	thalidomide	human	hESC	gene	LEF1	downregulation
33147516	CTD	thalidomide	human	embryoid body from hiPSC	gene	LEFTY1	upregulation
33763605	Literature	thalidomide	human	hiPSC	gene	LEFTY1	upregulation
33147516	CTD	thalidomide	human	embryoid body from hiPSC	gene	LEFTY2	upregulation
33763605	Literature	thalidomide	human	hiPSC mesoderm differentiated	gene	LEFTY2	downregulation
33763605	Literature	thalidomide	human	hiPSC	gene	LEFTY2	upregulation
20561110	Literature	thalidomide	human	hESC (H9)	gene	LGI1	upregulation
20561110	Literature	thalidomide	human	hESC (H9)	gene	MAP2	upregulation
20561110	Literature	thalidomide	human	hESC (H9)	gene	MAPK10	upregulation
25043012	CTD	thalidomide	human	HEK293T	protein	MEIS2	protein degradation
25043012	CTD	lenalidomide	human	HEK293T	protein	MEIS2	protein degradation
25043012	CTD	pomalidomide	human	HEK293T	protein	MEIS2	protein degradation
31711903	CTD	thalidomide	human	HESCA	gene	MEOX1	downregulation
31711903	CTD	thalidomide	human	HESCA	gene	MESP2	downregulation
14558594	CTD	thalidomide	human	endothelial cells	protein	MMP2	downregulation
22952932	Literature	thalidomide	human	hESC	gene	MSX1	downregulation
20561110	Literature	thalidomide	human	hESC (H9)	gene	MT1G	downregulation
33763605	Literature	thalidomide	human	hiPSC mesoderm differentiated	gene	MYC	upregulation
22952932	Literature	thalidomide	human	hESC	gene	MYH10	downregulation
20561110	Literature	thalidomide	human	hESC (H9)	gene	MYL3	downregulation
33147516	CTD	thalidomide	human	embryoid body from hiPSC	gene	MYO3B	downregulation
20561110	Literature	thalidomide	human	hESC (H9)	gene	NELL2	upregulation
22952932	Literature	thalidomide	human	hESC	gene	NES	downregulation
31711903	CTD	thalidomide	human	HESCA	gene	NEUROG2	upregulation
10533722	Pubtator	thalidomide	human	endothelial cells	protein	NFKB1	downregulation
11297551	Pubtator	thalidomide	human	HUVEC	protein	NFKB1	binding activity
11297551	Pubtator	thalidomide	human	HUVEC	protein	NFKB1	activity
11297551	Pubtator	thalidomide	human	HUVEC	protein	NFKB2	binding activity
11297551	Pubtator	thalidomide	human	HUVEC	protein	NFKB2	activity
22952932	Literature	thalidomide	human	hESC	gene	NKX2-5	downregulation
33147516	CTD	thalidomide	human	embryoid body from hiPSC	gene	NODAL	upregulation
16584574	Pubtator	thalidomide	human	ECV304	protein	NOS3	activity
L365420230	Embase	thalidomide	human	HUVEC	gene	NOTCH1	downregulation
24219762	Literature	thalidomide	human	HUVEC	protein	NOTCH1	downregulation
L365420230	Embase	thalidomide	human	HUVEC	protein	NOTCH1	downregulation
28496040	CTD	thalidomide	human	placenta	gene	NR1I2	upregulation
33763605	Literature	thalidomide	human	hiPSC mesoderm differentiated	gene	NR5A2	downregulation
22952932	Literature	thalidomide	human	hESC	gene	NRP1	downregulation
15741222	Literature	thalidomide	human	HUVEC	protein	NRP1	downregulation
15741222	Pubtator	thalidomide	human	HUVEC	protein	NRP1	downregulation
15741222	Pubtator	thalidomide	human	HUVEC	protein	NRP2	downregulation
32756504	Literature	thalidomide	human	hESC (neuronal diff)	gene	NRXN1	downregulation
22952932	Literature	thalidomide	human	hESC	gene	NUP160	downregulation
22952932	Literature	thalidomide	human	hESC	gene	NUP98	downregulation
31711903	CTD	thalidomide	human	HESCA	gene	OLIG3	upregulation
33763605	Literature	thalidomide	human	hiPSC mesoderm differentiated	gene	OTX2	upregulation
31711903	CTD	thalidomide	human	HESCA	gene	PAX3	downregulation
31711903	CTD	thalidomide	human	HESCA	gene	PAX6	upregulation
22952932	Literature	thalidomide	human	hESC	gene	PCDH8	downregulation
22952932	Literature	thalidomide	human	hESC	gene	PCSK5	downregulation
20561110	Literature	thalidomide	human	hESC (H9)	gene	PDE3A	upregulation
28745489	CTD	thalidomide	human	HUVEC	protein	PIK3CA	susceptibility
22952932	Literature	thalidomide	human	hESC	gene	PITX2	downregulation
22952932	Literature	thalidomide	human	hESC	gene	PKP2	downregulation
20561110	Literature	thalidomide	human	hESC (H9)	gene	PLAC8	downregulation
33147516	CTD	thalidomide	human	embryoid body from hiPSC	gene	PLVAP	downregulation
34764413	Pubtator	pomalidomide	human	HEK293T	protein	PLZF	downregulation
33763605	Literature	thalidomide	human	hiPSC mesoderm differentiated	gene	PODXL	downregulation
22952932	Literature	thalidomide	human	hESC	gene	POSTN	downregulation
24154490	Literature	thalidomide	human	hPSC	gene	PRKCA	upregulation
32756504	Literature	thalidomide	human	hESC (neuronal diff)	gene	PRKCD	downregulation
20561110	Literature	thalidomide	human	hESC (H9)	gene	PSD3	upregulation
22952932	Literature	thalidomide	human	hESC	gene	PSIP1	downregulation
22952932	Literature	thalidomide	human	hESC	gene	PTCH1	downregulation
18178729	Pubtator	thalidomide	human	embryonic fibroblast	protein	PTEN	upregulation
23858438	Pubtator	lenalidomide	human	HUVEC	protein	PTGS2	downregulation
33147516	CTD	thalidomide	human	embryoid body from hiPSC	gene	PTHLH	upregulation
22952932	Literature	thalidomide	human	hESC	gene	RAB23	downregulation
30067223	CTD	lenalidomide	human	hESC	protein	RAB28	protein degradation
30067223	CTD	pomalidomide	human	hESC	protein	RAB28	protein degradation
33445986	Literature	pomalidomide	human	human iPSCs	protein	RAB28	protein degradation
22952932	Literature	thalidomide	human	hESC	gene	RANBP1	downregulation
22952932	Literature	thalidomide	human	hESC	protein	RANBP1	downregulation
22952932	Literature	thalidomide	human	hESC	gene	RBBP4	downregulation
22952932	Literature	thalidomide	human	hESC	gene	RBL1	downregulation
22952932	Literature	thalidomide	human	hESC	gene	RBP4	downregulation
25043012	CTD	thalidomide	human	HEK293T	protein	RBX1	binding through CRBN
25043012	CTD	lenalidomide	human	HEK293T	protein	RBX1	binding through CRBN
25043012	CTD	pomalidomide	human	HEK293T	protein	RBX1	binding through CRBN
30067223	CTD	thalidomide	human	hESC	protein	RBX1	binding through CRBN
30067223	CTD	pomalidomide	human	hESC	protein	RBX1	binding through CRBN
22952932	Literature	thalidomide	human	hESC	gene	RELN	downregulation
33147516	CTD	thalidomide	human	embryoid body from hiPSC	gene	RGS4	upregulation
20561110	Literature	thalidomide	human	hESC (H9)	gene	RGS4	downregulation
30067223	CTD	thalidomide	human	hESC	protein	RNF166	protein degradation
25326112	Pubtator	thalidomide	human	HUVEC	gene	ROBO1	downregulation
33763605	Literature	thalidomide	human	hiPSC mesoderm differentiated	gene	RUNX1	downregulation
33763605	Literature	thalidomide	human	hiPSC mesoderm differentiated	gene	RUNX2	upregulation
22952932	Literature	thalidomide	human	hESC	gene	SALL4	downregulation
30067223	CTD	thalidomide	human	hESC	gene	SALL4	upregulation
30067223	CTD	thalidomide	human	hESC	protein	SALL4	protein degradation
30067223	CTD	lenalidomide	human	hESC	protein	SALL4	protein degradation
30067223	CTD	pomalidomide	human	hESC	protein	SALL4	protein degradation
30190590	Literature	thalidomide	human	human iPSCs	protein	SALL4	protein degradation
33445986	Literature	pomalidomide	human	human iPSCs	protein	SALL4	protein degradation
33445986	Literature	pomalidomide	human	embryoid body	protein	SALL4	protein degradation
33445986	Literature	pomalidomide	human	embryoid body	protein	SDC4	protein degradation
33445986	Literature	pomalidomide	human	embryoid body	protein	SDC4	decreased stability
22952932	Literature	thalidomide	human	hESC	gene	SEMA6A	downregulation
22952932	Literature	thalidomide	human	hESC	gene	SERPINA1	downregulation
20561110	Literature	thalidomide	human	hESC (H9)	gene	SERPIND1	upregulation
33445986	Literature	pomalidomide	human	embryoid body	protein	SLC2A3	protein degradation
25326112	Pubtator	thalidomide	human	HUVEC	gene	SLIT2	downregulation
20561110	Literature	thalidomide	human	hESC (H9)	gene	SLITRK1	upregulation
22952932	Literature	thalidomide	human	hESC	gene	SMARCA4	downregulation
20561110	Literature	thalidomide	human	hESC (H9)	gene	SNRPN	downregulation
22952932	Literature	thalidomide	human	hESC	gene	SOX1	downregulation
33763605	Literature	thalidomide	human	hiPSC mesoderm differentiated	gene	SOX17	downregulation
33763605	Literature	thalidomide	human	hiPSC	gene	SOX17	upregulation
24154490	CTD	thalidomide	human	hPSC	protein	SOX17	decreased localization
34425190	Literature	thalidomide	human	gastruloids	gene	SOX2	upregulation
22952932	Literature	thalidomide	human	hESC	gene	SOX6	downregulation
10533722	CTD	thalidomide	human	endothelial cells	protein	SP1	reduced activity
22952932	Literature	thalidomide	human	hESC	gene	SP8	downregulation
22952932	Literature	thalidomide	human	hESC	gene	SPARC	downregulation
16373662	CTD	pomalidomide	human	osteoclast progenitors	protein	SPI1	downregulation
20561110	Literature	thalidomide	human	hESC (H9)	gene	SPINK1	upregulation
22952932	Literature	thalidomide	human	hESC	gene	SPP1	downregulation
22952932	Literature	thalidomide	human	hESC	gene	SRGN	downregulation
32756504	Literature	thalidomide	human	hESC (neuronal diff)	gene	SYT15	downregulation
32756504	Literature	thalidomide	human	hESC (neuronal diff)	gene	SYT4	upregulation
20561110	Literature	thalidomide	human	hESC (H9)	gene	SYT4	upregulation
22952932	Literature	thalidomide	human	hESC	gene	TBX3	downregulation
33147516	CTD	thalidomide	human	embryoid body from hiPSC	gene	TBX3	upregulation
33763605	Literature	thalidomide	human	hiPSC	gene	TBX3	upregulation
28469241	Pubtator	thalidomide	human	HEK293T	protein	TBX5	binding
31711903	CTD	thalidomide	human	HESCA	gene	TCF15	downregulation
22952932	Literature	thalidomide	human	hESC	gene	TCF7L2	downregulation
22952932	Literature	thalidomide	human	hESC	gene	TDGF1	downregulation
22952932	Literature	thalidomide	human	hESC	gene	TDGF3	downregulation
20561110	Literature	thalidomide	human	hESC (H9)	gene	TDO2	upregulation
22952932	Literature	thalidomide	human	hESC	gene	TGFBR3	downregulation
22952932	Literature	thalidomide	human	hESC	gene	THBD	downregulation
10533722	Pubtator	thalidomide	human	endothelial cells	protein	TNF	downregulation
22710762	Pubtator	thalidomide	human	cord blood	protein	TNF	downregulation
22952932	Literature	thalidomide	human	hESC	gene	TNNT2	downregulation
11297551	Pubtator	thalidomide	human	HUVEC	gene	TRAF1	downregulation
11297551	Pubtator	thalidomide	human	HUVEC	gene	TRAF2	downregulation
20561110	Literature	thalidomide	human	hESC (H9)	gene	TRIM55	downregulation
33147516	CTD	thalidomide	human	embryoid body from hiPSC	gene	TRPM8	downregulation
33445986	Literature	pomalidomide	human	embryoid body	protein	TTN	protein degradation
33763605	Literature	thalidomide	human	hiPSC mesoderm differentiated	gene	TUBB3	upregulation
20561110	Literature	thalidomide	human	hESC (H9)	gene	UGT2B10	upregulation
20561110	Literature	thalidomide	human	hESC (H9)	gene	UGT2B11	upregulation
20561110	Literature	thalidomide	human	hESC (H9)	gene	UGT2B4	upregulation
20561110	Literature	thalidomide	human	hESC (H9)	gene	UGT2B7	upregulation
31711903	CTD	thalidomide	human	HESCA	gene	UNCX	downregulation
22098296	Literature	thalidomide	human	HUVEC	gene	VEGFA	downregulation
22952932	Literature	thalidomide	human	hESC	gene	VEGFA	downregulation
24154490	CTD	thalidomide	human	hPSC	gene	VEGFA	downregulation
24154490	Literature	thalidomide	human	hPSC	gene	VEGFA	downregulation
25326112	Pubtator	thalidomide	human	HUVEC	gene	VEGFA	downregulation
18805433	Pubtator	lenalidomide	human	HUVEC	protein	VEGFA	activity
19576118	Pubtator	thalidomide	human	HUVEC	protein	VEGFA	downregulation
22098296	Literature	thalidomide	human	HUVEC	protein	VEGFA	downregulation
33206273	Literature	thalidomide	human	HUVEC	protein	VEGFA	downregulation
33206273	Pubtator	thalidomide	human	HUVEC	protein	VEGFA	downregulation
30067223	CTD	pomalidomide	human	hESC	protein	WIZ	protein degradation
33147516	CTD	thalidomide	human	embryoid body from hiPSC	gene	WNT1	downregulation
17283219	Pubtator	thalidomide	human	embryonic fibroblast	protein	WNT1	blocks activity
18178729	Pubtator	thalidomide	human	embryonic fibroblast	protein	WNT1	downregulation
17283219	Pubtator	thalidomide	human	embryonic fibroblast	protein	WNT3A	blocks activity
18178729	Pubtator	thalidomide	human	embryonic fibroblast	protein	WNT3A	downregulation
17283219	Pubtator	thalidomide	human	embryonic fibroblast	protein	WNT5A	blocks activity
18178729	Pubtator	thalidomide	human	embryonic fibroblast	protein	WNT5A	downregulation
24154490	CTD	thalidomide	human	hPSC	gene	WNT5B	downregulation
24154490	Literature	thalidomide	human	hPSC	gene	WNT5B	downregulation
17283219	Pubtator	thalidomide	human	embryonic fibroblast	protein	WNT5B	blocks activity
18178729	Pubtator	thalidomide	human	embryonic fibroblast	protein	WNT5B	downregulation
33445986	Literature	pomalidomide	human	embryoid body	protein	ZBTB16	protein degradation
30067223	CTD	pomalidomide	human	hESC	protein	ZBTB39	protein degradation
33445986	Literature	pomalidomide	human	embryoid body	protein	ZBTB39	protein degradation
22952932	Literature	thalidomide	human	hESC	gene	ZEB1	downregulation
30067223	CTD	pomalidomide	human	hESC	protein	ZFP91	protein degradation
33445986	Literature	pomalidomide	human	human iPSCs	protein	ZFP91	protein degradation
33445986	Literature	pomalidomide	human	embryoid body	protein	ZFP91	protein degradation
22952932	Literature	thalidomide	human	hESC	gene	ZMYM2	downregulation
22952932	Literature	thalidomide	human	hESC	gene	ZNF367	downregulation
30067223	CTD	pomalidomide	human	hESC	protein	ZNF653	protein degradation
30067223	CTD	thalidomide	human	hESC	protein	ZNF692	protein degradation
30067223	CTD	lenalidomide	human	hESC	protein	ZNF827	protein degradation
