# Supplementary material for: A New Strategy for the Old Challenge of Thalidomide: Systems Biology Prioritization of Potential Immunomodulatory Drug (IMiD)-Targeted Transcription Factors
Source: Int J Mol Sci. 2023 Jul 15;24(14):11515. doi: 10.3390/ijms241411515 (PMC10380514; doi:10.3390/ijms241411515)
Supplement: Supplementary file 1 [file ijms-24-11515-s001.zip › Kowalski et al., 2023 - Table S2.xlsx]

## Sheet: Planilha1
Degree Distance
0	0
1	13
2	8
3	5
4	6
5	1
6	1
7	0
8	0
9	1
10	0
11	0
12	0
13	0
14	1
Clustering Distance
2	0.75
3	0.666667
4	0.333333
5	0.3
6	0.2
9	0.111111
14	0.0769231
Topological Coefficient
4	0.333333
4	0.333333
2	0.525
3	0.533333
2	0.590909
4	0.323529
4	0.392857
4	0.359375
3	0.5
2	0.633333
2	0.7
3	0.6
2	0.875
6	0.255556
5	0.305882
2	0.625
2	0.625
14	0.12782
4	0.291667
2	0.5
3	0.533333
3	0.533333
9	0.236111
Spatial Distance
1	102
2	310
3	316
4	270
5	158
6	76
7	24
8	4
Common Neighbors
1	144
2	11
Neighborhood Connectivity
2	7.875
1	7.76923
4	5.29167
9	2.33333
6	4.16667
14	2.85714
3	3.8
5	5.4
Node Betweenness
1	0
1	0
1	0
2	0
4	0.161345
2	0.17395
3	0
4	0.251261
4	0.0605042
1	0
2	0
1	0
4	0.064986
1	0
1	0
1	0
4	0.0887955
1	0
3	0.0571429
2	0
3	0.00168067
1	0
2	0
6	0.116807
1	0
5	0.0663866
1	0
2	0
14	0.747619
2	0
1	0
4	0.182913
2	0.0691877
3	0.0271709
9	0.397479
3	0
Closeness Centrality
2	0.416667
4	0.426829
1	0.269231
4	0.284553
1	0.269231
2	0.277778
1	0.269231
3	0.333333
1	0.336538
4	0.368421
1	0.336538
1	0.269231
4	0.291667
1	0.18617
1	0.336538
3	0.227273
4	0.357143
3	0.231788
1	0.271318
1	0.265152
2	0.228758
6	0.364583
5	0.364583
2	0.343137
2	0.346535
1	0.275591
2	0.225806
4	0.376344
14	0.5
2	0.357143
2	0.346535
1	0.269231
3	0.282258
3	0.333333
1	0.269231
9	0.364583
Stress Distance
0	21
1	1
10	1
100	12
1000	1
