# Supplementary material for: A New Strategy for the Old Challenge of Thalidomide: Systems Biology Prioritization of Potential Immunomodulatory Drug (IMiD)-Targeted Transcription Factors
Source: Int J Mol Sci. 2023 Jul 15;24(14):11515. doi: 10.3390/ijms241411515 (PMC10380514; doi:10.3390/ijms241411515)
Supplement: Supplementary file 1 [file ijms-24-11515-s001.zip › Kowalski et al., 2023 - Table S3.xlsx]

## Sheet: test_cytohubba
node_name	MCC	DMNC	MNC	Degree	EPC	BottleNeck	EcCentricity	Closeness	Radiality	Betweenness	Stress	ClusteringCoefficient
CTNNB1	17	0.23775	6	13	15.303	32	0.33333	20.8333	5.41935	713.667	1046	0.0641
CRBN	12	0.46346	3	9	12.383	6	0.2	15.5667	4.45161	283	524	0.11111
AKT1	6	0.30898	3	5	12.55	3	0.25	14.9167	4.67742	120	158	0.2
CUL4A	7	0.46346	3	4	12.318	9	0.25	15.6667	4.96774	220	368	0.5
HIF1A	4	0.30779	2	4	12.066	5	0.25	15.0833	4.80645	189.667	278	0.16667
SP1	5	0.30898	3	4	12.951	2	0.25	14.75	4.74194	69.3333	98	0.33333
NOTCH1	5	0.30898	3	4	12.808	2	0.25	14.5833	4.67742	66	92	0.33333
NFKB1	5	0.30898	3	4	13.06	2	0.25	14.4167	4.64516	64	98	0.33333
VEGFA	5	0.30898	3	4	9.625	3	0.2	12.4167	4.06452	93.6667	152	0.33333
RBX1	6	0.46346	3	3	10.72	1	0.2	12.5667	4.25806	0	0	1
DDB1	6	0.46346	3	3	11.086	1	0.2	12.5667	4.25806	0	0	1
KDR	3	0.30779	2	3	8.909	1	0.2	11.5	3.93548	28.3333	66	0.33333
NRP1	4	0.30898	3	3	8.12	1	0.16667	9.98333	3.19355	2	4	0.66667
CSNK1A1	2	0	1	2	11.036	1	0.25	14.6667	4.90323	132	276	0
CDH5	2	0	1	2	9.968	2	0.25	13.5833	4.64516	70.3333	120	0
PTEN	2	0.30779	2	2	10.763	1	0.25	13.25	4.54839	0	0	1
IKZF3	2	0.30779	2	2	8.49	1	0.16667	10.5167	3.51613	0	0	1
IKZF1	2	0.30779	2	2	8.674	1	0.16667	10.5167	3.51613	0	0	1
NRP2	2	0.30779	2	2	6.924	1	0.16667	9.31667	3.12903	0	0	1
ERBB2	1	0	1	1	8.138	1	0.25	12.4167	4.45161	0	0	0
WNT1	1	0	1	1	8.212	1	0.25	12.4167	4.45161	0	0	0
SOX17	1	0	1	1	7.96	1	0.25	12.4167	4.45161	0	0	0
PECAM1	1	0	1	1	8.067	1	0.25	12.4167	4.45161	0	0	0
BCL2	1	0	1	1	6.648	1	0.2	10.25	3.83871	0	0	0
EPAS1	1	0	1	1	6.704	1	0.2	10.0833	3.77419	0	0	0
PIK3CA	1	0	1	1	6.742	1	0.2	10.0667	3.70968	0	0	0
NOS3	1	0	1	1	7.145	1	0.2	10.0667	3.70968	0	0	0
SALL4	1	0	1	1	7.238	1	0.16667	10.0167	3.48387	0	0	0
ZFP91	1	0	1	1	6.343	1	0.16667	10.0167	3.48387	0	0	0
MEIS2	1	0	1	1	6.938	1	0.16667	10.0167	3.48387	0	0	0
DLL4	1	0	1	1	7.291	1	0.2	9.98333	3.70968	0	0	0
NFKB2	1	0	1	1	7.056	1	0.2	9.9	3.67742	0	0	0

## Sheet: Planilha1
Topological Analysis	Definition	Highest ranked nodes
Degree	Number of edges that connect to a node. Nodes with high degree are defined as hubs.	CTNNB1 (13), CRBN (9), and AKT1 (5)
Closeness	Measures how fast the flow of information travels through the nodes. High closeness centrality scores indicate fast information flow.	CTNNB1 (20.83), CUL4A (15.67), and CRBN (15.57)
Betweenness	Demonstrates how crowded a network is. High betweenness centrality score indicate nodes that can control the information flow.	CTNNB1 (713.67), CRBN (283), and CUL4A (220)
MCC	Maximal clique indicates subsets of nodes that cannot be extended by adding additional nodes, because all the nodes in the mentioned subset are already interacting with each other. This centrality is proposed by the developers of cytoHubba as the best method to obtain the essential proteins in a network.	CTNNB1 (17), CRBN (12), and CUL4A (7)
