# Supplementary material for: A New Strategy for the Old Challenge of Thalidomide: Systems Biology Prioritization of Potential Immunomodulatory Drug (IMiD)-Targeted Transcription Factors
Source: Int J Mol Sci. 2023 Jul 15;24(14):11515. doi: 10.3390/ijms241411515 (PMC10380514; doi:10.3390/ijms241411515)
Supplement: Supplementary file 1 [file ijms-24-11515-s001.zip › Kowalski et al., 2023 - Table S4.xlsx]

## Sheet: Página1
Assay	Cell Type / Tissue	Technology	Platform	IMiD	N Controls	N Exposed	PMID	Status	Observation
GSE162424	Skin biopsy	RNA-Seq	Illumina HiSeq 2000	thalidomide	12	12	34944673	Excluded - no significant gene
GSE179282	VCaP, Du145, and 22rv1 cells	RNA-Seq	Illumina HiSeq 2500	thalidomide	8	14	30918020	Included	Cell-types analyzed separately
GSE151239	Neuroprogenitor cells	Microarray	Agilent SurePrint G3 Human GE 8x60K Microarray	thalidomide	2	2	32756504	Excluded - no significant gene
GSE126786	H1-NPC cells	RNA-Seq	Illumina HiSeq 2500	thalidomide	11	11	32181450	Included
GSE89385	MOLT4 cells	RNA-Seq	Illumina NextSeq 500	thalidomide	3	3	NA	Excluded - multiple drugs exposure
GSE95375	MDA-MB-157, MDA-MB-231, and MDA-MB-468 cell lines	RNA-Seq	Illumina HiSeq 2500	thalidomide	18	18	28209615	Included	Cell-types analyzed separately
GSE63935	Human pluripotent stem cell	RNA-Seq	Illumina HiSeq 2500	thalidomide	6	6	26392547	Included	Times of exposure analyzed separately
GSE71224	Glioblastoma cells xenografts	Microarray	Affymetrix Human Gene 1.0 ST Array	thalidomide	3	3	26362268	Excluded - no significant gene
GSE60742	Bone marrow culture	Microarray	Affymetrix Human Gene 1.0 ST Array	thalidomide	3	4	NA	Excluded - no significant gene
GSE15913	Peripheral blood	Microarray	Affymetrix Human Genome U133 Plus 2.0 Array	thalidomide	20	20	19440214	Included
GSE8546	Human myeloma cell P0075	Microarray	Affymetrix Human Genome U95 Version 2 Array	thalidomide	42	42	18676754	Excluded - no significant gene
GSE31421	OPM2 cells	Microarray	Affymetrix Human Genome U133 Plus 2.0 Array	lenalidomide	2	3	21860026	Excluded - no significant gene
GSE94728	Hct116 cells	RNA-Seq	Illumina HiSeq 2500	lenalidomide	4	4	28530236	Included
GSE162212	CD41+ and CD105+	Microarray	Agilent SurePrint G3 Human GE 8x60K Microarray	lenalidomide	0	8	NA	Excluded - no control samples
GSE151607	Diffuse large B-cell lymphoma	RNA-Seq	Illumina NextSeq 550	lenalidomide	4	4	34168051	Excluded - raw data not available
GSE155597	KOPN-57bi cells	Microarray	Affymetrix Human Genome U133 Plus 2.0 Array	lenalidomide	3	3	34117218	Included
GSE115328	OSU-CLL cell line	RNA-Seq	Illumina HiSeq 2500	lenalidomide	6	6	NA	Excluded - no significant gene
GSE158438	CD4+, CD8+, and PD-1 cells	RNA-Seq	Illumina HiSeq 4000	lenalidomide	22	23	33877296	Included	Groups analyzed separately
GSE165332	Macrophages	RNA-Seq	Illumina HiSeq 2500	lenalidomide	5	5	NA	Included
GSE123660	OPM1 cells	RNA-Seq	Illumina NextSeq 500	lenalidomide	3	3	30760870	Included
GSE126265	MDS cell line	Microarray	Affymetrix Human Gene Expression Array	lenalidomide	12	12	32251398	Excluded - probes not defined
GSE128251	H929 cells	Microarray	Illumina HumanHT-12 V4.0 expression beadchip	lenalidomide	3	3	31714026	Included
GSE113281	CAR-T cells	RNA-Seq	Illumina NextSeq 500	lenalidomide	4	4	31395689	Excluded - genetically modified cells
GSE102976	Bone marrow mononuclear cells	Microarray	Affymetrix Human Gene 2.0 ST Array	lenalidomide	0	74	28972593	Excluded - no control samples
GSE122985	HCT116 cells	Microarray	Illumina HumanHT-12 V4.0 expression beadchip	lenalidomide	3	3	33093925	Included
GSE76425	Bone marrow plasma cells	RNA-Seq	Illumina HiSeq 2000	lenalidomide	7	7	NA	Excluded - no significant gene
GSE113031	OPM2 cells	RNA-Seq	Illumina NextSeq 500	lenalidomide	2	2	30228232	Included
GSE112953	CD19+ cells	Microarray	Affymetrix Human Genome U133 Plus 2.0 Array	lenalidomide	0	44	30104242	Excluded - no control samples
GSE111994	Hematopoietic stem/progenitor cells-derived megakaryocyte	Microarray	Agilent SurePrint G3 Human GE 8x60K Microarray	lenalidomide	4	4	NA	Included
GSE168462	Human acute myeloid leukemia cells	RNA-Seq	Illumina NextSeq 500	lenalidomide	9	9	35534777	Included
GSE87910	CD19+ cells	Microarray	Agilent Whole Human Genome Microarray 4x44K	lenalidomide	0	16	28639485	Excluded - no control samples
GSE102976	Bone marrow mononuclear cells	Microarray	Affymetrix Human Gene 2.0 ST Array	lenalidomide	0	74	28972593	Excluded - no control samples
GSE79660	Chronic lymphocytic leukemia cells	Microarray	Affymetrix Human Genome U133 Plus 2.0 Array	lenalidomide	3	3	27287425	Included
GSE84251	CD8+ T cells	Microarray	Affymetrix Human Genome U133 Plus 2.0 Array	lenalidomide	9	3	NA	Included
GSE60618	BC3 cells	Microarray	Illumina HumanHT-12 V4.0 expression beadchip	lenalidomide	6	6	26119939	Excluded - no significant gene
GSE75084	CD34+ HSPCs	Microarray	Affymetrix Human Genome U133A 2.0 Array	lenalidomide	5	5	27389073	Excluded - no significant gene
GSE57861	PBMC	Microarray	Agilent Whole Human Genome Microarray 4x44K	lenalidomide	4	4	25398834	Excluded - no significant gene
GSE37302	JJN3 cells	Microarray	Affymetrix Human Genome U133 Plus 2.0 Array	lenalidomide	3	6	23178378	Included
GSE31460	CD14+ monocytes	Microarray	Illumina HumanRef-8 v3.0 expression beadchip	lenalidomide	12	5	22608605	Excluded - no access to platform data
GSE28896	CD34+ cells	Microarray	Affymetrix HT Human Genome U133A Array	lenalidomide	3	3	21527522	Included
GSE147320	Lymphoma cell line	RNA-Seq	Illumina HiSeq 2000	pomalidomide	2	2	32906688	Included
GSE150341	CD34+ erythroid cells	RNA-Seq	Illumina NextSeq 500	pomalidomide	4	4	32956454	Included
GSE126463	MM.1S cells	RNA-Seq	Illumina NovaSeq 6000	pomalidomide	3	9	32958952	Included
GSE144052	CD34+ erythroid cells	RNA-Seq	Illumina NextSeq 500	pomalidomide	4	4	32268371	Included
GSE94341	Plasmacytoma	Microarray	Affymetrix Human Gene 2.0 ST Array	pomalidomide	3	3	28860344	Excluded - no access to platform data
NA = Not available
