# Supplementary material for: A New Strategy for the Old Challenge of Thalidomide: Systems Biology Prioritization of Potential Immunomodulatory Drug (IMiD)-Targeted Transcription Factors
Source: Int J Mol Sci. 2023 Jul 15;24(14):11515. doi: 10.3390/ijms241411515 (PMC10380514; doi:10.3390/ijms241411515)
Supplement: Supplementary file 1 [file ijms-24-11515-s001.zip › Kowalski et al., 2023 - Table S5.xlsx]

## Sheet: Sheet 1
SYMBOL	n
A1BG	1
A1CF	2
A2M	3
A2M-AS1	1
A4GALT	1
AACSP1	1
AAMDC	1
AANAT	1
AARS1	1
AASS	4
AATBC	1
AATK	2
ABAT	1
ABCA1	5
ABCA10	1
ABCA11P	1
ABCA12	2
ABCA13	1
ABCA2	1
ABCA3	2
ABCA5	1
ABCA6	1
ABCA7	1
ABCA9	3
ABCB10	1
ABCB4	4
ABCB9	1
ABCC11	1
ABCC3	2
ABCC6	1
ABCC6P1	1
ABCD1	1
ABCD2	2
ABCD4	1
ABCE1	1
ABCF2	1
ABCG1	6
ABCG2	3
ABCG5	1
ABHD1	2
ABHD10	1
ABHD11-AS1	2
ABHD6	2
ABI2	1
ABI3	2
ABI3BP	1
ABLIM2	1
ABLIM3	1
ABO	1
ABTB1	2
ABTB2	2
ACAA2	2
ACACA	2
ACADL	1
ACAP1	3
ACAT1	1
ACAT2	3
ACBD4	1
ACCS	1
ACCSL	1
ACD	1
ACE	3
ACHE	1
ACKR2	1
ACKR3	1
ACKR4	1
ACLY	1
ACOT12	1
ACOT13	1
ACOT7	3
ACOX1	1
ACOXL	2
ACP1	1
ACP5	1
ACSF2	1
ACSL1	1
ACSL3	1
ACSL6	2
ACSM1	1
ACSM3	3
ACSS1	2
ACSS2	2
ACTA2	2
ACTB	1
ACTG1P17	1
ACTL7B	1
ACTL8	3
ACTN1	2
ACTN1-AS1	1
ACTN2	1
ACTN3	1
ACTR2	1
ACTR3B	1
ACTR6	1
ACTRT3	2
ACVR1	2
ACVR1B	2
ACVR1C	1
ACVR2A	2
ACVR2B	2
ACVR2B-AS1	2
ACVRL1	3
ACY3	2
ACYP1	1
ADA	3
ADA2	3
ADAM11	1
ADAM12	2
ADAM19	1
ADAM20	1
ADAM20P1	1
ADAM21	1
ADAM23	2
ADAM28	4
ADAM33	1
ADAM9	1
ADAMDEC1	2
ADAMTS1	2
ADAMTS10	2
ADAMTS13	2
ADAMTS15	1
ADAMTS17	1
ADAMTS18	1
ADAMTS3	1
ADAMTS4	1
ADAMTS5	1
ADAMTS6	1
ADAMTS7	2
ADAMTS8	1
ADAMTS9	1
ADAMTSL2	2
ADAMTSL3	1
ADAMTSL4	2
ADAMTSL4-AS1	2
ADAMTSL5	1
ADAP1	1
ADAP2	2
ADARB1	1
ADCY10P1	1
ADCY4	1
ADCY6	1
ADCY7	1
ADCY9	1
ADGB	2
ADGRA1	1
ADGRB1	1
ADGRB2	1
ADGRB3	2
ADGRD1	1
ADGRE1	1
ADGRE2	3
ADGRE4P	1
ADGRE5	1
ADGRF3	2
ADGRF4	1
ADGRG2	1
ADGRG5	1
ADGRG7	1
ADGRL1	1
ADGRL2	1
ADGRL4	1
ADGRV1	2
ADHFE1	1
ADI1	1
ADIRF	1
ADK	1
ADM	4
ADM2	2
ADM5	1
ADNP-AS1	2
ADORA1	1
ADPGK-AS1	1
ADPRH	2
ADPRHL1	1
ADPRHL2	1
ADRA1A	2
ADRA1B	1
ADRA1D	1
ADRA2A	1
ADRA2B	1
ADRA2C	1
ADRB2	1
ADRM1	1
ADSL	1
ADSS2	1
AEBP1	2
AEN	2
AFAP1-AS1	1
AFAP1L2	3
AFDN	1
AFF1-AS1	1
AFF3	1
AFF4	1
AGAP1	1
AGAP2	1
AGAP2-AS1	1
AGBL1	1
AGBL2	2
AGBL3	1
AGBL4	1
AGBL5-AS1	1
AGFG2	1
AGMAT	1
AGPAT4	2
AGPAT4-IT1	1
AGPS	1
AGRN	1
AHCY	2
AHCYL2	1
AHNAK	1
AHNAK2	3
AHRR	2
AHSA1	2
AHSP	1
AICDA	1
AIF1	3
AIF1L	2
AIFM3	1
AJM1	1
AJUBA	3
AK2	1
AK4	2
AK6	1
AK7	1
AK8	1
AK9	1
AKAIN1	1
AKAP12	5
AKAP13	1
AKAP3	3
AKAP5	1
AKAP6	2
AKAP7	1
AKAP9	1
AKIP1	1
AKR1B10	1
AKR1B15	1
AKR1C1	5
AKR1C2	5
AKR1C3	4
AKR1C4	3
AKR1E2	1
AKT3	1
ALB	1
ALDH18A1	1
ALDH1A1	1
ALDH1A2	1
ALDH1B1	1
ALDH1L2	2
ALDH2	2
ALDH3A1	1
ALDH3B1	2
ALDH5A1	2
ALDH6A1	1
ALDH7A1	5
ALDH8A1	1
ALDOC	2
ALG10	1
ALG13	1
ALG1L2	1
ALG5	1
ALK	1
ALKAL1	2
ALKAL2	1
ALKBH2	1
ALKBH3-AS1	1
ALKBH7	1
ALMS1-IT1	2
ALOX12	1
ALOX12-AS1	1
ALOX15	3
ALOX5	2
ALOX5AP	2
ALOXE3	1
ALPG	1
ALPK1	5
ALPK3	2
ALS2CL	4
ALX1	1
ALX4	2
ALYREF	2
AMBN	1
AMBP	1
AMD1	1
AMIGO1	1
AMIGO2	5
AMOTL1	3
AMOTL2	2
AMPD1	1
AMPD3	5
AMT	1
AMY1B	1
AMY2A	1
ANAPC10	1
ANAPC13	1
ANAPC15	1
ANG	1
ANGPT1	1
ANGPT2	1
ANGPT4	1
ANGPTL1	2
ANGPTL3	1
ANGPTL4	2
ANGPTL6	1
ANK1	2
ANK2	1
ANK3	2
ANKDD1B	1
ANKK1	1
ANKMY1	1
ANKRD1	1
ANKRD12	1
ANKRD13B	1
ANKRD18B	1
ANKRD18DP	1
ANKRD2	1
ANKRD20A11P	1
ANKRD22	2
ANKRD23	1
ANKRD24	3
ANKRD26P1	1
ANKRD29	2
ANKRD30BP3	2
ANKRD31	1
ANKRD34A	1
ANKRD34B	1
ANKRD35	1
ANKRD36	2
ANKRD36B	1
ANKRD36BP1	1
ANKRD36BP2	2
ANKRD36C	1
ANKRD37	1
ANKRD39	1
ANKRD42	1
ANKRD44	1
ANKRD45	1
ANKRD55	1
ANKRD6	1
ANKRD9	1
ANKS1B	1
ANKS6	1
ANLN	1
ANO2	2
ANO4	1
ANO9	2
ANOS1	2
ANP32A	1
ANP32A-IT1	1
ANP32E	2
ANPEP	3
ANTXR1	6
ANTXR2	2
ANXA1	2
ANXA10	1
ANXA11	1
ANXA2R	1
ANXA3	3
ANXA4	2
ANXA9	1
AOAH	2
AOC1	1
AOC2	1
AOX1	1
AP1S1	1
AP1S2	2
AP1S3	1
AP2S1	1
AP3B2	1
AP4B1	1
APBB1IP	1
APBB3	1
APC2	2
APCDD1	1
APH1B	1
APIP	2
APLN	2
APLNR	2
APLP1	1
APOBEC3B	1
APOBEC3D	2
APOBEC3F	1
APOBEC3G	2
APOBEC3H	3
APOBR	1
APOL1	2
APOL3	2
APOL4	2
APOL6	6
APOLD1	1
APOO	2
APOOP5	1
APPL2	1
APTR	1
AQP1	4
AQP10	1
AQP3	3
AQP6	1
AR	2
ARAP2	1
ARAP3	1
AREG	1
ARF3	2
ARFGEF3	1
ARG1	1
ARG2	2
ARGFXP2	1
ARHGAP10	3
ARHGAP12	1
ARHGAP15	1
ARHGAP18	1
ARHGAP19	2
ARHGAP20	1
ARHGAP22	3
ARHGAP24	3
ARHGAP28	1
ARHGAP30	1
ARHGAP31	5
ARHGAP31-AS1	1
ARHGAP32	1
ARHGAP4	1
ARHGAP42	1
ARHGAP5-AS1	1
ARHGAP6	2
ARHGAP9	2
ARHGDIB	1
ARHGDIG	1
ARHGEF10L	1
ARHGEF11	1
ARHGEF16	1
ARHGEF17	2
ARHGEF25	1
ARHGEF26	2
ARHGEF3	5
ARHGEF34P	1
ARHGEF35	1
ARHGEF37	1
ARHGEF39	1
ARHGEF40	3
ARHGEF5	2
ARHGEF6	1
ARHGEF7	1
ARID3B	1
ARID5B	1
ARL10	1
ARL11	1
ARL14EPL	1
ARL15	1
ARL2BP	2
ARL3	1
ARL4A	1
ARL4C	3
ARL6IP5	1
ARL6IP6	1
ARL9	1
ARMC12	1
ARMC4	2
ARMC6	1
ARMC8	1
ARMC9	1
ARMCX1	2
ARMCX4	2
ARMH1	3
ARMH4	1
ARNT2	1
ARNTL2	3
ARPC1B	1
ARPC3	1
ARPC5	1
ARPIN	3
ARPP21	1
ARR3	2
ARRB1	2
ARRB2	2
ARRDC3	1
ARRDC4	4
ARSA	1
ART5	1
ARVCF	1
ARX	1
ASAH1	1
ASAP1-IT1	1
ASAP1-IT2	1
ASAP2	1
ASAP3	2
ASB11	1
ASB16-AS1	1
ASB2	3
ASB4	1
ASB9	1
ASCL1	1
ASCL2	1
ASCL5	1
ASF1B	4
ASGR2	1
ASIC1	1
ASIC3	1
ASIC4	1
ASIC5	1
ASIP	1
ASMTL-AS1	2
ASNS	3
ASPDH	3
ASS1	3
ASTL	1
ASXL3	2
ATAD2	3
ATAD3A	1
ATAD3B	1
ATAD5	2
ATE1-AS1	1
ATF3	1
ATF4	2
ATF5	1
ATF7	1
ATF7IP	1
ATG10	1
ATG12	1
ATG16L2	1
ATG5	1
ATG9B	1
ATL1	1
ATL3	1
ATOH1	1
ATOH8	2
ATOX1	1
ATP10B	3
ATP10D	3
ATP11AUN	2
ATP13A4	4
ATP1A1-AS1	1
ATP1A2	1
ATP1A3	3
ATP1A4	1
ATP1B2	1
ATP2A1	1
ATP2A1-AS1	2
ATP2A3	1
ATP2B1-AS1	1
ATP2B2	2
ATP2B3	1
ATP2B4	4
ATP2C2	1
ATP5F1B	1
ATP5F1E	1
ATP5MC1	2
ATP5MC3	1
ATP5MD	1
ATP5PB	1
ATP6AP1L	1
ATP6V0C	1
ATP6V0CP3	1
ATP6V1A	1
ATP6V1B1-AS1	1
ATP6V1C2	2
ATP6V1D	1
ATP6V1G2	2
ATP7A	1
ATP8A1	3
ATP8A2	1
ATP8B1	1
ATP8B2	3
ATP8B3	1
ATP9A	1
ATP9B	1
ATRIP	1
ATRNL1	2
ATXN1	2
ATXN1-AS1	1
ATXN3	1
ATXN7L1	3
AUH	1
AUNIP	3
AURKA	1
AURKAP1	2
AURKB	1
AUTS2	2
AVEN	1
AVIL	2
AVPI1	1
AVPR2	2
AXDND1	1
AXIN2	1
AXL	3
AZIN1-AS1	2
AZIN2	2
AZU1	1
B2M	1
B3GALNT1	2
B3GALNT2	1
B3GALT2	1
B3GALT4	2
B3GAT2	1
B3GLCT	1
B3GNT5	1
B3GNT7	2
B3GNT8	1
B4GALNT1	1
B4GALNT3	1
B4GALT1-AS1	1
B4GALT2	3
B4GALT6	1
BAALC	2
BAAT	1
BACE1	3
BACE1-AS	1
BACE2	3
BACH2	1
BAG2	2
BAHCC1	1
BAIAP2	1
BAIAP2-DT	2
BAIAP2L2	1
BAIAP3	3
BAMBI	2
BANK1	1
BARD1	1
BARX1	1
BASP1-AS1	1
BATF	1
BATF2	3
BATF3	3
BAX	1
BAZ2B	1
BBC3	4
BBS1	1
BBS10	1
BBS12	1
BBX	1
BCAM	1
BCAN	2
BCAP29	1
BCAP31	1
BCAR1	3
BCAR3	1
BCAS2	1
BCAS3	1
BCAS4	1
BCAT1	3
BCDIN3D	2
BCDIN3D-AS1	1
BCL10	1
BCL11A	2
BCL2A1	3
BCL2L10	1
BCL2L11	2
BCL2L12	1
BCL2L15	1
BCL2L2	1
BCL3	2
BCL6	5
BCL7A	1
BCL9L	2
BCLAF3	1
BCO1	1
BCR	1
BCS1L	1
BDH2	2
BDKRB2	1
BDNF	2
BDNF-AS	2
BEAN1	1
BEND3	1
BEND5	1
BEND6	2
BEND7	1
BEST1	1
BEST3	1
BEST4	1
BEX2	2
BEX3	3
BEX4	4
BGLAP	2
BGLT3	1
BGN	1
BHLHB9	2
BHLHE22	1
BHLHE40	5
BHLHE41	1
BICDL1	1
BICDL2	2
BICRA	1
BID	1
BIN1	2
BIN2	1
BIRC2	1
BIRC5	2
BIRC6-AS2	1
BISPR	2
BLACAT1	1
BLACE	1
BLK	1
BLM	3
BLMH	2
BLNK	5
BLOC1S1	1
BLOC1S2	1
BLVRA	3
BMF	3
BMI1	1
BMP2	4
BMP4	1
BMP7	2
BMPER	1
BMPR2	2
BMS1P1	4
BMS1P2	2
BMS1P21	1
BNC2	1
BNIP1	1
BNIP3L	1
BNIP5	2
BOK	1
BOK-AS1	1
BOLA2	1
BOLA2B	1
BOLA3	3
BOLA3-AS1	1
BOP1	1
BORA	2
BORCS6	1
BPI	1
BRCA1	4
BRCA2	3
BRCC3	1
BRD3OS	1
BRF2	1
BRI3BP	2
BRINP2	1
BRIP1	4
BRIX1	2
BRMS1	1
BRSK1	2
BRSK2	1
BRWD1	1
BRWD1-AS2	2
BSN	3
BST2	1
BTBD10	1
BTBD11	1
BTBD16	1
BTBD19	3
BTBD6	1
BTBD8	1
BTC	2
BTG1	2
BTG2	2
BTG3	1
BTN1A1	1
BTN2A3P	3
BTN3A1	2
BTN3A2	1
BTN3A3	2
BUB1	3
BUB1B	1
BUB3	2
BUD31	1
BVES	1
BYSL	1
C10orf105	1
C10orf143	1
C10orf71	1
C10orf71-AS1	1
C10orf90	1
C10orf95	1
C10orf99	2
C11orf42	1
C11orf45	4
C11orf53	1
C11orf68	2
C11orf91	1
C11orf95	6
C11orf96	1
C12orf45	2
C12orf57	1
C12orf60	2
C12orf71	1
C12orf75	3
C12orf76	1
C12orf77	1
C13orf46	1
C14orf177	1
C14orf28	2
C15orf41	1
C15orf48	2
C15orf56	1
C15orf62	1
C15orf65	1
C16orf71	1
C16orf74	3
C16orf86	1
C16orf87	1
C16orf89	1
C16orf95	1
C17orf102	1
C17orf107	1
C17orf58	2
C17orf67	1
C17orf97	1
C18orf32	1
C18orf54	3
C19orf48	2
C19orf57	2
C19orf67	1
C19orf81	1
C1orf105	1
C1orf112	1
C1orf115	2
C1orf116	1
C1orf127	2
C1orf174	1
C1orf194	1
C1orf21	2
C1orf220	1
C1orf43	1
C1orf53	1
C1orf61	1
C1orf74	1
C1QA	1
C1QBP	1
C1QL1	1
C1QTNF1	2
C1QTNF6	2
C1QTNF7-AS1	1
C1R	1
C1RL	3
C1RL-AS1	1
C1S	3
C2	3
C2-AS1	1
C20orf202	1
C20orf203	2
C20orf204	2
C20orf27	1
C21orf58	1
C21orf62	2
C22orf15	2
C22orf42	1
C2CD2	1
C2CD4A	1
C2CD4D	2
C2CD4D-AS1	1
C2orf16	2
C2orf68	1
C2orf72	1
C2orf73	1
C2orf81	1
C2orf88	1
C2orf91	1
C2orf92	1
C3	3
C3AR1	1
C3orf14	1
C3orf20	2
C3orf52	2
C3orf70	1
C3orf80	3
C4A	3
C4B	3
C4orf19	1
C4orf33	1
C4orf46	3
C4orf48	1
C4orf51	1
C4orf54	2
C5	2
C5AR1	3
C5AR2	1
C5orf34	1
C5orf49	1
C5orf64	1
C6orf141	1
C6orf15	1
C6orf163	1
C6orf201	1
C6orf223	1
C6orf99	1
C7orf33	1
C7orf57	1
C7orf77	1
C8G	1
C8orf31	1
C8orf37	1
C8orf37-AS1	1
C8orf44	2
C8orf49	1
C8orf58	2
C9orf139	1
C9orf163	1
C9orf24	1
C9orf40	3
C9orf47	1
C9orf50	1
CA1	1
CA11	6
CA12	1
CA13	3
CA14	1
CA2	3
CA3	1
CA5B	1
CA9	3
CABLES1	2
CABLES2	1
CABP1	1
CABP4	1
CABP5	1
CACNA1A	3
CACNA1B	1
CACNA1C-AS1	1
CACNA1E	1
CACNA1F	1
CACNA1G	1
CACNA1G-AS1	1
CACNA1H	1
CACNA1I	1
CACNA2D3	3
CACNA2D4	2
CACNB1	1
CACNB3	3
CACNB4	3
CACNG5	1
CACNG6	1
CACNG7	1
CACNG8	1
CACTIN-AS1	1
CACYBP	3
CADPS	2
CALB1	5
CALB2	2
CALCOCO1	2
CALCRL	3
CALD1	2
CALHM2	4
CALHM5	3
CALHM6	1
CALM2	1
CALML3	1
CALML4	1
CALML6	1
CALN1	1
CALU	1
CALY	1
CAMK1	2
CAMK2A	1
CAMK2B	1
CAMK4	1
CAMP	1
CAND1.11	1
CAP2	1
CAPG	2
CAPN11	1
CAPN12	2
CAPN14	1
CAPN2	2
CAPN3	3
CAPN5	4
CAPN6	2
CAPRIN2	1
CAPS	2
CAPS2	1
CAPZB	1
CARD10	2
CARD14	1
CARD16	1
CARD17	1
CARD6	4
CARHSP1	1
CARMIL1	1
CARMIL3	2
CARNMT1-AS1	1
CARNS1	2
CARS1	3
CASC8	1
CASK	1
CASKIN2	2
CASP1	1
CASP10	1
CASP2	1
CASP4	4
CASP5	2
CASP8AP2	1
CASS4	1
CASTOR1	2
CASTOR2	1
CASZ1	2
CATIP-AS1	1
CATIP-AS2	1
CATSPER2	1
CATSPERD	1
CATSPERG	2
CATSPERZ	1
CAV1	2
CAV2	1
CAVIN1	4
CAVIN2	3
CAVIN3	1
CAVIN4	1
CBFA2T2	1
CBFB	1
CBLB	2
CBLN2	1
CBLN4	1
CBR3	1
CBS	1
CBSL	2
CBX2	1
CBX3	1
CBX4	2
CBX5	2
CC2D2A	2
CC2D2B	2
CCBE1	1
CCDC102A	1
CCDC102B	1
CCDC103	2
CCDC106	1
CCDC110	1
CCDC112	1
CCDC114	2
CCDC120	1
CCDC125	1
CCDC126	1
CCDC134	1
CCDC136	1
CCDC138	2
CCDC140	1
CCDC141	1
CCDC144A	1
CCDC144B	1
CCDC144CP	2
CCDC146	1
CCDC149	2
CCDC15	1
CCDC150	2
CCDC152	2
CCDC155	1
CCDC157	1
CCDC159	1
CCDC162P	1
CCDC167	1
CCDC168	1
CCDC170	1
CCDC173	1
CCDC175	1
CCDC177	1
CCDC18	2
CCDC18-AS1	2
CCDC181	1
CCDC183-AS1	1
CCDC184	1
CCDC187	1
CCDC188	1
CCDC189	1
CCDC191	1
CCDC196	1
CCDC197	1
CCDC198	1
CCDC200	1
CCDC24	1
CCDC26	2
CCDC28B	1
CCDC30	1
CCDC34	3
CCDC40	1
CCDC50	1
CCDC63	1
CCDC65	1
CCDC73	1
CCDC78	1
CCDC85A	1
CCDC85B	1
CCDC85C	2
CCDC86	1
CCDC87	1
CCDC88A	2
CCDC88B	1
CCDC91	1
CCDC92	1
CCDC92B	1
CCDC96	1
CCDC9B	2
CCL1	1
CCL17	1
CCL2	7
CCL20	1
CCL22	2
CCL23	1
CCL3	6
CCL3L1	1
CCL3L3	5
CCL4	1
CCL4L2	3
CCL5	2
CCN1	2
CCN2	4
CCN3	1
CCN4	1
CCN5	1
CCNA2	1
CCNB1	1
CCNB2	1
CCNB3	1
CCND1	1
CCND2-AS1	2
CCND3	1
CCNE1	1
CCNE2	4
CCNG2	2
CCNJL	2
CCNL2	2
CCNT2-AS1	1
CCNYL2	1
CCPG1	1
CCR1	1
CCR2	2
CCR5	1
CCR6	1
CCR7	1
CCR8	1
CCSAP	1
CCSER1	1
CCSER2	1
CCT2	2
CCT3	1
CCT5	1
CCT6A	1
CCT6B	2
CCT7	1
CCZ1B	1
CD109	2
CD14	4
CD160	1
CD163	2
CD163L1	1
CD164L2	1
CD177	2
CD180	2
CD1A	1
CD1B	1
CD1C	2
CD1D	1
CD1E	1
CD2	1
CD200	1
CD207	2
CD209	2
CD226	2
CD244	1
CD247	3
CD27	1
CD27-AS1	2
CD274	4
CD276	1
CD300A	1
CD300C	1
CD320	1
CD33	1
CD34	1
CD36	1
CD37	1
CD38	2
CD3D	1
CD3EAP	2
CD3G	1
CD40	4
CD44	2
CD48	2
CD5	1
CD55	1
CD58	1
CD59	1
CD6	3
CD68	5
CD69	1
CD7	2
CD70	2
CD72	1
CD74	2
CD80	1
CD82	1
CD83	1
CD84	1
CD86	2
CD8A	2
CD9	2
CD93	1
CD96	1
CD99	1
CDA	1
CDC14A	1
CDC14B	2
CDC14C	3
CDC20	1
CDC23	1
CDC25A	4
CDC25C	2
CDC27	1
CDC37L1-DT	1
CDC42BPA	1
CDC42BPG	2
CDC42EP1	2
CDC42EP2	1
CDC42EP3	4
CDC42EP5	2
CDC45	4
CDC5L	1
CDC6	4
CDC7	1
CDCA2	1
CDCA3	1
CDCA4	2
CDCA5	3
CDCA7	2
CDCA8	2
CDCP1	4
CDH1	3
CDH11	1
CDH15	2
CDH17	1
CDH20	1
CDH23	1
CDH24	1
CDH5	1
CDHR1	2
CDHR2	2
CDHR3	1
CDHR4	1
CDK1	2
CDK13	1
CDK18	3
CDK2	3
CDK4	3
CDK5R1	3
CDK5R2	1
CDK6	2
CDK8	1
CDKL2	1
CDKL5	1
CDKN1A	2
CDKN1C	2
CDKN2AIPNL	1
CDKN2B	1
CDKN2D	2
CDKN3	1
CDNF	2
CDON	1
CDR1	1
CDR2L	2
CDRT1	1
CDRT15P1	1
CDSN	2
CDT1	3
CDV3	1
CDYL2	1
CEACAM1	3
CEACAM19	1
CEACAM21	1
CEACAM4	2
CEACAM6	3
CEBPA	2
CEBPB	3
CEBPB-AS1	2
CEBPD	4
CEBPE	2
CEBPG	2
CECR2	1
CEL	1
CELA2A	1
CELA2B	1
CELF2-AS1	2
CELF2-AS2	1
CELF4	1
CELF6	1
CELP	1
CELSR1	1
CELSR2	5
CEMIP2	4
CEND1	1
CENPA	2
CENPE	1
CENPH	3
CENPI	2
CENPJ	2
CENPK	2
CENPL	2
CENPM	2
CENPN	3
CENPO	2
CENPP	1
CENPQ	3
CENPS	1
CENPT	1
CENPU	3
CENPW	3
CENPX	2
CEP128	3
CEP135	1
CEP152	2
CEP170B	1
CEP295NL	3
CEP55	1
CEP70	1
CEP76	2
CEP78	1
CEP85L	1
CERCAM	2
CERNA1	1
CES3	1
CES4A	1
CES5A	1
CETN3	1
CETP	3
CFAP161	1
CFAP206	1
CFAP43	2
CFAP44-AS1	1
CFAP47	1
CFAP54	1
CFAP57	2
CFAP58	2
CFAP65	1
CFAP69	3
CFAP70	2
CFAP74	1
CFAP99	1
CFB	1
CFH	7
CFHR1	1
CFHR3	1
CFI	1
CFL1	1
CFL2	1
CFLAR	2
CFLAR-AS1	1
CFP	3
CGAS	1
CGN	4
CGNL1	1
CGREF1	1
CGRRF1	1
CH25H	1
CH507-42P11.6	1
CHAC1	4
CHAC2	3
CHAD	2
CHAF1A	4
CHAF1B	4
CHCHD2	1
CHCHD3	1
CHCHD7	1
CHD2	1
CHD3	3
CHDH	1
CHEK1	2
CHEK2	1
CHI3L1	4
CHI3L2	2
CHIC1	1
CHIT1	1
CHKB-DT	1
CHMP1B	1
CHMP4C	1
CHODL	1
CHP1	1
CHPT1	1
CHRD	1
CHRFAM7A	1
CHRM3	1
CHRM3-AS2	1
CHRM4	1
CHRNA1	1
CHRNA2	1
CHRNA5	1
CHRNA6	2
CHRNA7	1
CHRNA9	1
CHRNB1	1
CHRNB2	2
CHRNB4	1
CHRNE	1
CHRNG	1
CHROMR	1
CHST11	1
CHST13	1
CHST15	3
CHST2	5
CHST3	1
CHST6	1
CHST8	1
CHST9	1
CHSY3	1
CHTF18	1
CIAPIN1	1
CIB2	2
CIB3	1
CIB4	1
CIDECP1	1
CIITA	4
CINP	1
CIP2A	2
CIRBP-AS1	1
CISD1	1
CISD3	1
CISH	1
CISTR	1
CITED2	3
CITED4	1
CKAP2	1
CKAP2L	3
CKAP4	1
CKAP5	2
CKMT1A	3
CKMT1B	3
CKMT2	1
CKS1B	3
CKS2	2
CLASP1	2
CLBA1	1
CLC	1
CLCA4-AS1	2
CLCN1	3
CLCNKA	1
CLDN1	1
CLDN10	1
CLDN11	2
CLDN12	3
CLDN14	3
CLDN18	2
CLDN2	1
CLDN20	1
CLDN23	1
CLDN4	1
CLDN5	1
CLDN7	1
CLEC10A	2
CLEC11A	2
CLEC12A	1
CLEC12B	1
CLEC17A	1
CLEC18A	1
CLEC18C	1
CLEC19A	2
CLEC1A	2
CLEC1B	1
CLEC2B	1
CLEC2D	1
CLEC3B	1
CLEC4A	2
CLEC4G	1
CLEC4M	2
CLEC5A	2
CLEC9A	1
CLECL1	1
CLHC1	2
CLIC2	2
CLIC3	1
CLIC5	1
CLIC6	1
CLIP2	3
CLIP4	1
CLK1	1
CLK4	2
CLMN	2
CLMP	2
CLN5	2
CLN6	2
CLPB	1
CLRN3	1
CLSPN	4
CLSTN2	1
CLSTN2-AS1	1
CLSTN3	2
CLTA	1
CLTB	1
CLTCL1	2
CLU	1
CLUL1	1
CMA1	1
CMAHP	2
CMBL	3
CMC2	2
CMC4	1
CMPK2	2
CMSS1	2
CMTM3	1
CMTM7	2
CNBD2	1
CNDP1	1
CNFN	2
CNGA4	1
CNIH2	1
CNIH3	1
CNKSR1	1
CNKSR2	1
CNN3	1
CNOT2-DT	1
CNOT7	1
CNOT9	1
CNR1	2
CNRIP1	2
CNTLN	1
CNTN1	2
CNTN2	1
CNTN3	1
CNTN6	1
CNTNAP1	1
CNTNAP2	2
CNTNAP3C	1
CNTNAP5	1
CNTRL	2
COA1	1
COA4	1
COA6	1
COA6-AS1	2
COA7	1
COCH	2
COL10A1	1
COL11A2	1
COL12A1	2
COL13A1	1
COL14A1	2
COL15A1	1
COL16A1	3
COL18A1	1
COL18A1-AS1	1
COL1A1	3
COL20A1	1
COL21A1	2
COL24A1	1
COL27A1	3
COL28A1	2
COL4A2	1
COL5A1	2
COL5A2	1
COL6A1	4
COL6A2	1
COL6A3	1
COL6A4P1	1
COL6A4P2	1
COL6A5	1
COL9A3	3
COLCA1	1
COLCA2	1
COLEC10	1
COLGALT1	1
COLGALT2	1
COLQ	1
COMMD10	1
COMT	1
COPE	1
COPG2	1
COPG2IT1	1
COPRS	1
COPS3	2
COPS8	1
COQ2	2
COQ3	2
CORO1A	1
CORO1B	7
CORO1C	2
CORO2A	1
CORO2B	3
COTL1	3
COX16	1
COX17	1
COX20	1
COX6B2	1
COX7A1	1
COX7B	1
CP	1
CPA4	1
CPA5	1
CPAMD8	1
CPEB1	3
CPEB3	1
CPEB4	1
CPED1	2
CPLX1	1
CPM	1
CPNE2	1
CPNE3	2
CPNE4	1
CPNE7	1
CPNE9	1
CPPED1	1
CPQ	1
CPSF2	1
CPSF6	1
CPT1C	1
CPXM2	1
CPZ	3
CR1	1
CR2	2
CRABP2	1
CRACR2B	2
CRAT37	1
CRB2	2
CREB1	1
CREB3L1	1
CREB5	2
CREBRF	3
CRH	1
CRHBP	3
CRHR2	2
CRIM1	1
CRIP1	1
CRIP2	1
CRIPT	1
CRISPLD1	1
CRISPLD2	2
CRLF1	1
CRMP1	1
CROCCP3	3
CRTC1	1
CRY1	1
CRYAB	1
CRYBA2	1
CRYBA4	2
CRYBB1	2
CRYBG1	2
CRYBG2	1
CRYBG3	4
CRYGN	1
CRYM	1
CRYM-AS1	1
CRYZL1	1
CSAD	1
CSDC2	1
CSE1L	3
CSF1	2
CSF1R	3
CSF2	2
CSF2RB	3
CSGALNACT1	3
CSK	1
CSMD1	1
CSNK1E	1
CSPG4	1
CSPG5	1
CSRNP1	2
CSRP2	2
CSRP3	1
CST6	1
CST7	1
CSTF2	1
CSTF3-DT	1
CTAG1A	1
CTC-338M12.4	1
CTD-2201I18.1	1
CTDSP2	2
CTDSPL	2
CTDSPL2	1
CTH	3
CTHRC1	1
CTNNA1	1
CTNNA2	3
CTNNA3	1
CTNNAL1	2
CTNNBIP1	1
CTNNBL1	1
CTNND1	3
CTNS	1
CTPS1	3
CTRC	1
CTSB	1
CTSE	1
CTSF	1
CTSG	1
CTSH	2
CTSK	2
CTSL	1
CTSO	3
CTSS	2
CTSW	2
CTSZ	3
CTTN	2
CTTNBP2NL	6
CTU2	1
CTXN1	1
CTXN2	1
CTXND1	1
CUBN	1
CUEDC1	3
CUL1	1
CUX1	1
CUX2	1
CWC15	1
CX3CR1	5
CXADR	1
CXADRP3	1
CXCL1	1
CXCL10	4
CXCL11	2
CXCL12	3
CXCL13	1
CXCL16	1
CXCL2	4
CXCL3	1
CXCL5	1
CXCL8	3
CXCL9	1
CXCR3	1
CXCR4	1
CXCR5	1
CXCR6	1
CXorf65	1
CXXC5	1
CYB5B	1
CYB5D2	1
CYB5R2	1
CYB5RL	1
CYBA	1
CYBB	2
CYBRD1	2
CYCS	2
CYFIP1	2
CYGB	1
CYLC1	1
CYLD	1
CYP11A1	3
CYP19A1	5
CYP1A1	2
CYP1B1	6
CYP1B1-AS1	1
CYP20A1	1
CYP26A1	1
CYP2A6	2
CYP2B6	1
CYP2C18	1
CYP2C9	1
CYP2D6	2
CYP2D7	1
CYP2E1	1
CYP2G1P	1
CYP2S1	2
CYP3A5	1
CYP46A1	1
CYP4F11	1
CYP4F12	1
CYP4F2	1
CYP4F3	3
CYP4Z2P	1
CYP51A1	1
CYP7B1	1
CYS1	1
CYSLTR1	3
CYSLTR2	1
CYSRT1	1
CYTH3	1
CYTH4	2
CYTIP	1
CYTL1	2
CYTOR	1
CYYR1	1
DAAM1	1
DAB2	2
DAB2IP	1
DACT1	1
DACT3	1
DAGLA	2
DAGLB	2
DAND5	2
DANT2	1
DAPK1	1
DAPK2	4
DAPP1	2
DARS-AS1	2
DARS2	1
DAW1	1
DBF4	2
DBF4B	1
DBH	1
DBI	1
DBIL5P2	1
DBNDD2	1
DBP	2
DCAF13	1
DCAF13P3	1
DCAF4	1
DCAF8	1
DCC	1
DCDC2	1
DCDC2B	1
DCHS1	1
DCHS2	1
DCK	2
DCLK1	1
DCLK2	1
DCLRE1A	1
DCLRE1B	3
DCPS	2
DCST2	2
DCT	2
DCTN5	1
DCTPP1	3
DCUN1D1	1
DCXR	1
DDA1	1
DDAH1	1
DDI2	1
DDIAS	3
DDIT3	4
DDIT4	4
DDIT4L	4
DDN	3
DDO	4
DDOST	1
DDR1	2
DDR2	3
DDX10	1
DDX11-AS1	1
DDX12P	1
DDX17	1
DDX18	1
DDX21	1
DDX31	1
DDX39A	2
DDX47	1
DDX56	1
DDX58	2
DDX59-AS1	2
DDX60	5
DDX60L	6
DECR2	1
DEFB1	2
DENND11	2
DENND1C	1
DENND2B	4
DENND2C	2
DENND2D	1
DENND5A	2
DENR	1
DEPDC1	1
DEPDC1B	1
DEPDC4	1
DEPP1	4
DEPTOR	2
DES	2
DGAT2	2
DGCR10	2
DGCR9	1
DGKA	2
DGKB	1
DGLUCY	1
DHCR24	1
DHCR7	2
DHDH	2
DHFR	4
DHRS11	1
DHRS12	1
DHRS13	1
DHRS3	4
DHRS7B	2
DHRS9	1
DHX58	3
DIAPH1-AS1	1
DIAPH2	1
DIAPH3	2
DICER1-AS1	1
DIP2A	1
DIP2A-IT1	1
DIP2C	1
DIRAS1	2
DIRAS2	2
DIRAS3	1
DIS3L	1
DISC1	2
DISP2	1
DISP3	2
DIXDC1	1
DKC1	1
DKK1	2
DKK2	2
DLAT	2
DLC1	1
DLEC1	1
DLEU1	1
DLEU1-AS1	1
DLEU7	1
DLG4	3
DLG5	1
DLGAP1	1
DLGAP1-AS1	1
DLGAP1-AS3	1
DLGAP2	1
DLGAP3	3
DLGAP4	1
DLGAP4-AS1	1
DLGAP5	1
DLL1	1
DLL4	3
DLX1	1
DLX2	1
DLX4	1
DLX6-AS1	2
DMAC1	1
DMBT1	1
DMC1	2
DMD	1
DMPK	1
DMRT2	1
DMRTA1	1
DMRTA2	1
DMTN	1
DMXL2	2
DNA2	3
DNAAF1	2
DNAAF4	1
DNAH1	1
DNAH10	1
DNAH12	2
DNAH17-AS1	2
DNAH2	2
DNAH3	1
DNAH6	1
DNAH7	1
DNAJB5-DT	1
DNAJB6	1
DNAJC12	2
DNAJC15	1
DNAJC18	1
DNAJC2	1
DNAJC22	4
DNAJC27-AS1	1
DNAJC28	2
DNAJC30	1
DNAJC5B	1
DNAJC5G	1
DNAJC9	3
DNASE1L2	1
DNER	1
DNHD1	1
DNLZ	1
DNM1	1
DNM1P35	1
DNM3	3
DNMBP	1
DNMBP-AS1	1
DNMT1	1
DNMT3B	1
DOC2A	3
DOC2GP	1
DOCK1	1
DOCK10	1
DOCK11	3
DOCK2	1
DOCK4	2
DOCK6	2
DOCK7	1
DOCK9	3
DOK3	2
DOK4	7
DOK5	1
DOK7	1
DONSON	2
DOP1A	1
DOP1B	1
DPAGT1	1
DPCD	1
DPEP1	1
DPEP2	2
DPF1	1
DPF3	3
DPH2	1
DPH3	1
DPH5	1
DPP10-AS1	1
DPP4	4
DPP6	1
DPRXP4	1
DPY19L2P2	1
DPYD	1
DPYSL2	1
DPYSL3	2
DPYSL4	1
DQX1	2
DRAM1	1
DRC1	1
DRC3	1
DRD4	2
DRP2	1
DSC2	1
DSCAM	1
DSCC1	2
DSCR9	1
DSE	1
DSEL	5
DSN1	2
DSP	1
DST-AS1	1
DTL	3
DTX2P1-UPK3BP1-PMS2P11	1
DTX3L	6
DTX4	1
DTYMK	3
DUOX1	1
DUOX2	2
DUOXA2	1
[truncated: 6,625 more rows]
