# Supplementary material for: A New Strategy for the Old Challenge of Thalidomide: Systems Biology Prioritization of Potential Immunomodulatory Drug (IMiD)-Targeted Transcription Factors
Source: Int J Mol Sci. 2023 Jul 15;24(14):11515. doi: 10.3390/ijms241411515 (PMC10380514; doi:10.3390/ijms241411515)
Supplement: Supplementary file 1 [file ijms-24-11515-s001.zip › Kowalski et al., 2023 - Table S7.xlsx]

## Sheet: TableS7
	ONTOLOGY	ID	Description	setSize	enrichmentScore	NES	pvalue	p.adjust	qvalues	rank	leading_edge	core_enrichment
GO:0000165	BP	GO:0000165	MAPK cascade	412	0.33957	1.47066	9.999e-05	0.00242704	0.00187151	2819	tags=43%, list=33%, signal=31%	6347/6348/9590/414062/1950/2213/4914/650/1490/958/1116/2534/9290/3559/83729/4254/8829/25780/7099/677/84962/246/728/634/1436/1439/1742/1844/1848/1942/2043/2065/2149/338557/221472/2258/2261/2335/4616/2621/10457/1839/3082/28996/3486/3487/3560/3563/3624/128239/3976/4035/4055/5600/4233/4853/5031/5063/8654/5154/5155/10213/8482/153769/6653/10253/55333/7057/7078/7422/148/389658/51074/367/7984/408/409/655…
GO:0000228	CC	GO:0000228	nuclear chromosome	249	0.378552	1.61949	9.999e-05	0.00242704	0.00187151	2800	tags=47%, list=32%, signal=32%	157570/55723/672/8318/10036/8208/9837/51659/8365/55388/4173/4174/4436/4582/23397/4998/23594/7703/23649/5888/7015/641/675/699/113130/1051/1107/10370/64858/1763/8110/1869/146956/2237/84296/8330/8334/3015/8520/4172/4175/4176/10062/5111/5422/10714/10622/5557/5558/10592/6839/54962/7153/7273/51377/29128/11169/10189/81611/367/80816/332/57658/23468/983/1058/64105/79172/1111/11144/79980/2146/63979/8468/30…
GO:0000278	BP	GO:0000278	mitotic cell cycle	458	0.410268	1.7804	9.999e-05	0.00242704	0.00187151	2895	tags=51%, list=34%, signal=36%	6347/604/1950/84515/9088/388/58480/7280/672/9134/993/8318/990/63967/1719/2669/9837/55388/4173/4174/4436/4582/23397/4998/23594/22822/23649/5579/5888/5933/6241/7015/347733/51175/7298/677/81569/84632/199/84962/440/586/641/675/699/168448/113130/1017/1019/81620/387103/1163/64858/220042/1763/51514/1869/1894/1978/146956/10457/3280/3082/3398/3624/128239/3978/11178/4085/84930/4172/4175/4176/9833/27085/460…
GO:0001525	BP	GO:0001525	angiogenesis	263	0.384035	1.64546	9.999e-05	0.00242704	0.00187151	2889	tags=47%, list=33%, signal=32%	6347/2013/1545/6678/1524/1950/2034/10855/3690/388/133/358/672/1490/958/23670/1116/3627/5168/2113/3678/8829/5579/7015/94/154810/290/306/58504/83478/718/728/10203/634/3576/54567/1870/1942/51162/1960/2335/2822/10457/3082/28996/3162/126393/3696/4897/5154/5175/10769/54538/10253/90627/55333/7045/7057/22846/7422/90/8038/577/79924/51421/51129/301/8862/187/694/29775/857/3491/729230/1512/1536/79733/2022/19…
GO:0001568	BP	GO:0001568	blood vessel development	347	0.373986	1.61317	9.999e-05	0.00242704	0.00187151	2791	tags=45%, list=32%, signal=32%	6347/2013/84168/1545/6678/1524/79659/1950/2034/10855/3690/388/133/358/672/1490/958/23670/1116/3627/1649/5168/2113/3678/8829/639/5579/7015/677/94/154810/290/306/58504/83478/718/728/10203/634/1277/3576/54567/1870/1942/51162/1960/2335/2348/2822/10457/57493/3280/3082/28996/3162/126393/3696/4035/4036/4897/5154/5155/5175/10769/54538/9021/10253/90627/55333/7045/7049/7057/22846/7422/59/90/93/8038/577/799…
GO:0001667	BP	GO:0001667	ameboidal-type cell migration	208	0.379555	1.61435	9.999e-05	0.00242704	0.00187151	2545	tags=43%, list=29%, signal=31%	57175/2013/1545/6678/9590/3690/388/958/1803/5168/2113/4254/8829/11156/94/154810/306/9564/634/4921/54567/1942/1960/2335/2348/10755/2822/1839/3162/4233/4318/5063/5155/5175/10769/5872/10500/8482/6546/90627/55333/7057/22846/7422/90/91/51421/301/84913/655/659/29775/23332/23603/286204/1512/11221/1969/83481/2246/8817/27086/152007/2896/10014/3146/3565/3695/57608/9314/3868/5606/4763/7026/8828/5058/5629/56…
GO:0001775	BP	GO:0001775	cell activation	682	0.368711	1.61131	9.999e-05	0.00242704	0.00187151	2917	tags=47%, list=34%, signal=34%	6347/6348/2212/9590/272/604/29760/968/2213/11148/10855/3690/284021/64332/4914/6280/57823/340061/1490/929/29126/958/1116/3627/1803/2177/2534/2841/2934/3109/3115/3559/4436/639/57580/5579/91543/6279/6402/5270/7099/79865/677/100/51816/30817/199/290/306/10396/558/25825/116071/55509/718/728/825/923/634/4680/1051/5199/1277/23406/1503/1522/3576/54567/139818/1960/5169/9156/2149/10875/2621/9535/10457/3043/…
GO:0001816	BP	GO:0001816	cytokine production	375	0.331142	1.43137	9.999e-05	0.00242704	0.00187151	2912	tags=43%, list=34%, signal=30%	5142/6348/1545/19/9590/604/1524/55601/2213/11148/10855/6280/340061/672/929/29126/958/1116/1649/2841/3115/3665/4210/91543/6279/7099/84632/199/558/718/728/919/923/634/1051/1436/79132/2149/338557/2335/2621/10457/57493/51191/3082/3162/3566/3624/3696/3902/4035/5600/4602/22861/9111/10622/51728/338382/8482/6441/6556/7057/7100/7318/11326/225/301/307/384/408/409/468/554/602/11119/727/824/729230/10666/972/…
GO:0001932	BP	GO:0001932	regulation of protein phosphorylation	640	0.3482	1.52027	9.999e-05	0.00242704	0.00187151	2819	tags=44%, list=33%, signal=32%	6347/2013/6348/83666/9590/414062/1524/1950/2213/3690/4914/9088/9467/493/650/1490/9134/958/993/990/1116/63967/3627/54541/5168/2534/9290/83729/3678/4254/8829/54625/7099/1636/94/84632/199/84962/246/641/718/728/1019/8851/634/1163/1436/4921/1742/1844/1848/1894/1942/2043/2065/2149/338557/221472/2258/2261/2335/4616/2621/9535/10457/1839/57493/51191/3280/3082/28996/3486/3487/3624/389119/3843/128239/3976/4…
GO:0001934	BP	GO:0001934	positive regulation of protein phosphorylation	467	0.359448	1.5605	9.999e-05	0.00242704	0.00187151	2411	tags=40%, list=28%, signal=31%	6347/2013/6348/83666/9590/414062/1524/1950/2213/3690/4914/493/650/1490/958/990/1116/63967/5168/2534/9290/83729/3678/4254/8829/54625/7099/1636/94/84632/199/84962/246/718/728/8851/1163/1436/4921/1742/1848/1894/1942/2043/2065/2149/338557/221472/2258/2261/4616/2621/10457/1839/3280/3082/28996/3486/3487/3624/128239/3976/4035/4055/5600/22924/4318/54892/4853/5031/5063/8654/5154/5155/5175/5649/8482/153769…
GO:0001944	BP	GO:0001944	vasculature development	357	0.372424	1.60805	9.999e-05	0.00242704	0.00187151	2791	tags=45%, list=32%, signal=32%	6347/2013/84168/1545/6678/1524/79659/1950/2034/10855/3690/388/133/358/672/1490/958/23670/1116/3627/1649/5168/2113/3678/8829/639/5579/7015/677/94/154810/290/306/58504/83478/718/728/10203/634/1277/1491/3576/54567/1870/1942/51162/1960/2335/2348/2822/10457/57493/3280/3082/28996/3162/126393/3696/3976/4035/4036/4897/5154/5155/5175/10769/54538/9021/10253/90627/55333/7045/7049/7057/22846/7422/59/90/93/80…
GO:0002237	BP	GO:0002237	response to molecule of bacterial origin	161	0.387118	1.63029	9.999e-05	0.00242704	0.00187151	2817	tags=47%, list=33%, signal=32%	6347/5142/6348/6678/19/9590/968/1524/2213/133/929/29126/3627/2920/4360/6279/7099/445/558/721/728/923/1019/1051/1439/3576/2149/2353/2678/10062/6556/6590/11093/824/6352/4064/942/1053/129607/1268/1437/6373/1543/11221/27086/2679/55970/10014/3146/3248/3383/3587/3592/3593/3553/11213/345611/3726/3965/4016/114548/5144/5724/5732/5734/9536/5739/140885/4091/284297/6915/7056/7124/54209/10221
GO:0002250	BP	GO:0002250	adaptive immune response	263	0.368642	1.5795	9.999e-05	0.00242704	0.00187151	1934	tags=37%, list=22%, signal=29%	2013/604/2213/64332/57823/29126/958/2534/3109/3115/3119/3122/3127/3665/4436/639/5579/91543/7099/100/246/51279/716/717/718/720/721/919/923/634/9156/10875/3108/3117/3543/3566/3902/5819/5551/5896/6097/710/6556/28526/7374/301/384/79915/602/11119/10384/727/729230/911/30835/10666/962/924/970/972/942/925/10462/50856/10332/1380/1512/1520/11221/3077/3113/3120/3123/3134/3142/3146/57824/3329/3383/3493/3494/…
GO:0002252	BP	GO:0002252	immune effector process	561	0.38493	1.67709	9.999e-05	0.00242704	0.00187151	2585	tags=44%, list=30%, signal=33%	3075/2013/3437/6348/151636/2212/8519/4940/83666/5627/272/604/968/55601/2213/10855/284021/4600/64332/6280/57823/340061/929/958/1116/3627/54541/2534/2934/3109/3119/2537/3434/3559/3665/4436/4939/91543/64108/6279/6402/5272/7099/2/1636/100/51816/30817/290/306/164668/10396/51279/716/717/718/720/721/728/919/634/4680/5199/23406/1522/79132/139818/5169/9156/10875/9535/3043/51191/3162/3429/10964/3433/24138/…
GO:0002263	BP	GO:0002263	cell activation involved in immune response	331	0.37881	1.63267	9.999e-05	0.00242704	0.00187151	2609	tags=45%, list=30%, signal=33%	6348/2212/272/604/968/2213/10855/284021/64332/6280/340061/929/958/1116/2934/3109/4436/6279/6402/7099/100/51816/30817/290/306/10396/718/728/634/4680/5199/23406/1522/139818/5169/9156/10875/9535/3043/3162/3566/3956/4035/25840/4318/4602/4853/4973/5175/10213/25797/8635/6097/27180/6556/6518/6590/374403/203068/7374/221/230/240/301/64333/79915/602/729230/10576/57126/4064/911/960/942/23601/8895/83716/1512…
GO:0002274	BP	GO:0002274	myeloid leukocyte activation	312	0.370992	1.59633	9.999e-05	0.00242704	0.00187151	2609	tags=45%, list=30%, signal=32%	6348/2212/272/968/2213/10855/284021/6280/340061/929/1116/2934/57580/6279/6402/7099/51816/30817/199/290/306/10396/116071/55509/718/728/634/4680/5199/23406/1522/3576/5169/10875/9535/3043/3162/3566/4055/25840/4318/5819/10062/4973/5175/10213/25797/8635/27180/6556/6518/6590/374403/7057/203068/10537/11326/221/230/240/64333/6352/729230/10576/57126/10666/960/972/1050/23601/1268/8895/83716/1435/1437/1512/…
GO:0002275	BP	GO:0002275	myeloid cell activation involved in immune response	247	0.36435	1.55833	9.999e-05	0.00242704	0.00187151	2609	tags=44%, list=30%, signal=31%	6348/2212/272/968/10855/284021/6280/340061/929/1116/2934/6279/6402/51816/30817/290/306/10396/718/728/634/4680/5199/23406/1522/5169/10875/9535/3043/3162/3566/25840/4318/4973/5175/10213/25797/8635/27180/6556/6518/6590/374403/203068/221/230/240/64333/729230/10576/57126/960/23601/8895/83716/1512/1520/1536/23191/79930/79980/8288/2171/2204/2357/2358/84443/2717/2896/3146/3240/388697/3310/84329/3683/8514…
GO:0002366	BP	GO:0002366	leukocyte activation involved in immune response	330	0.377034	1.62508	9.999e-05	0.00242704	0.00187151	2609	tags=45%, list=30%, signal=33%	6348/2212/272/604/968/2213/10855/284021/64332/6280/340061/929/958/1116/2934/3109/4436/6279/6402/7099/100/51816/30817/290/306/10396/718/728/634/4680/5199/23406/1522/139818/5169/9156/10875/9535/3043/3162/3566/3956/25840/4318/4602/4853/4973/5175/10213/25797/8635/6097/27180/6556/6518/6590/374403/203068/7374/221/230/240/301/64333/79915/602/729230/10576/57126/4064/911/960/942/23601/8895/83716/1512/1520…
GO:0002443	BP	GO:0002443	leukocyte mediated immunity	387	0.3654	1.58057	9.999e-05	0.00242704	0.00187151	2423	tags=42%, list=28%, signal=31%	2013/6348/2212/272/604/968/2213/10855/284021/6280/57823/340061/929/958/1116/2934/3119/3665/4436/91543/6279/6402/5272/7099/1636/51816/30817/290/306/10396/51279/716/717/718/720/721/728/634/4680/5199/23406/1522/9156/10875/9535/3043/3162/3543/3566/3902/25840/4318/5819/4973/5175/5551/10213/25797/8635/710/27180/6556/6518/6590/374403/28526/203068/7374/221/230/240/64333/409/79915/602/10384/727/729230/105…
GO:0002444	BP	GO:0002444	myeloid leukocyte mediated immunity	251	0.373035	1.59646	9.999e-05	0.00242704	0.00187151	2609	tags=44%, list=30%, signal=32%	6348/2212/272/968/2213/10855/284021/6280/340061/929/1116/2934/6279/6402/5272/1636/51816/30817/290/306/10396/718/728/634/4680/5199/23406/1522/10875/9535/3043/3162/3566/25840/4318/4973/5175/10213/25797/8635/27180/6556/6518/6590/374403/203068/221/230/240/64333/729230/10576/57126/960/23601/8895/83716/1512/1520/1536/23191/23586/79930/79980/8288/2171/2204/2357/2358/84443/2717/2896/3146/3240/388697/3310…
GO:0002446	BP	GO:0002446	neutrophil mediated immunity	228	0.354818	1.51404	9.999e-05	0.00242704	0.00187151	2609	tags=43%, list=30%, signal=31%	2212/272/968/10855/6280/340061/929/1116/2934/6279/6402/1636/51816/290/306/10396/718/728/634/4680/5199/23406/1522/10875/9535/3043/25840/4318/4973/5175/10213/25797/8635/27180/6556/6518/6590/374403/203068/221/230/240/64333/10576/57126/960/23601/8895/83716/1512/1520/1536/23191/79930/79980/8288/2171/2204/2357/2358/84443/2717/2896/3146/3240/388697/3310/84329/3683/8514/116844/199675/8972/4311/64386/2311…
GO:0002460	BP	GO:0002460	adaptive immune response based on somatic recombination of immune receptors built from immunoglobulin superfamily domains	164	0.393107	1.65637	9.999e-05	0.00242704	0.00187151	1862	tags=39%, list=22%, signal=31%	2013/604/2213/64332/29126/958/3119/3665/4436/91543/7099/100/51279/716/717/718/720/721/634/9156/10875/3543/3566/5819/5551/6097/710/6556/28526/7374/301/79915/602/10384/727/729230/911/10666/970/972/925/1380/1512/3077/3134/3142/3146/3329/3383/3493/3494/3514/3592/3593/8809/8807/3553/9173/51561/3565/3575/3662/182/3718
GO:0002520	BP	GO:0002520	immune system development	468	0.335995	1.45861	9.999e-05	0.00242704	0.00187151	2917	tags=44%, list=34%, signal=31%	6348/604/29760/2034/157570/2213/64332/4914/29126/958/1052/2113/2177/2841/9290/8365/55008/3559/3665/4254/4436/639/57580/5579/91543/7099/10100/677/1636/100/558/116071/55509/675/760/634/1051/10370/1436/54567/139818/1960/9156/10875/2353/10468/2621/3280/28996/3398/3566/3624/84623/3902/3956/3976/4055/4151/9833/407975/4318/4602/54892/4830/4853/128506/8544/10721/10213/338382/5896/6097/9644/29887/85439/70…
GO:0002521	BP	GO:0002521	leukocyte differentiation	262	0.392843	1.68326	9.999e-05	0.00242704	0.00187151	2917	tags=50%, list=34%, signal=34%	6348/604/29760/2213/64332/4914/2177/2841/9290/3559/3665/4254/4436/639/57580/91543/7099/10100/677/100/558/116071/55509/760/634/1051/1436/54567/139818/1960/10875/2353/2621/3398/3566/3624/3902/3956/3976/4055/407975/4318/4602/4830/4853/128506/8544/5896/6097/9644/29887/10537/7422/6935/301/602/632/729230/135228/972/942/925/1021/1050/1053/1054/51208/112616/1380/1435/1437/25979/11221/1969/2124/2175/2200/…
GO:0002682	BP	GO:0002682	regulation of immune system process	738	0.360014	1.57555	9.999e-05	0.00242704	0.00187151	2917	tags=45%, list=34%, signal=33%	6347/3075/5142/6348/151636/2212/8519/83666/5627/1831/80216/604/968/1524/1588/55601/2213/11148/284021/64332/6280/57823/340061/929/29126/958/3627/23604/1803/2113/2177/2534/2841/9290/2934/8365/3109/3115/3119/3122/3127/3434/3559/3665/4254/4436/4582/54625/639/5579/91543/6279/6402/5272/7099/54210/79865/677/2/1636/100/30817/199/246/360/558/9564/54718/51279/716/717/718/720/721/728/760/784/919/923/634/105…
GO:0002683	BP	GO:0002683	negative regulation of immune system process	232	0.387852	1.65565	9.999e-05	0.00242704	0.00187151	2885	tags=49%, list=33%, signal=33%	6347/6348/1831/604/968/1588/2213/284021/929/29126/2841/9290/8365/3559/4254/54625/5272/7099/677/2/100/246/558/634/1051/6387/79132/5169/10875/10457/3280/3162/3398/3566/3624/3902/54892/4830/9111/10062/8654/338382/710/6441/7057/11326/301/384/409/727/729230/972/942/1021/51208/1268/1843/11221/2200/10272/2737/2852/29909/2896/121504/8370/8366/3077/3134/3142/3146/3205/5654/3593/9173/133396/3565/3575/3623/…
GO:0002684	BP	GO:0002684	positive regulation of immune system process	522	0.349906	1.52276	9.999e-05	0.00242704	0.00187151	2911	tags=44%, list=34%, signal=31%	6347/3075/5142/6348/2212/83666/5627/80216/604/55601/2213/11148/64332/6280/340061/929/29126/958/3627/23604/1803/2113/2534/3109/3115/3119/3122/3127/3559/3665/4254/4436/4582/5579/91543/6279/7099/677/2/100/30817/199/360/558/9564/54718/51279/716/717/718/720/721/728/760/784/919/923/634/5199/6387/3576/79132/1960/5169/2353/2621/2822/3280/3117/3162/3398/3543/3566/3624/3902/3956/3976/4602/5819/10062/128506…
GO:0002694	BP	GO:0002694	regulation of leukocyte activation	281	0.370812	1.59166	9.999e-05	0.00242704	0.00187151	2917	tags=48%, list=34%, signal=33%	6347/6348/604/2213/11148/284021/64332/29126/958/1803/2177/2534/2934/3109/3115/3559/4436/639/7099/677/100/30817/199/558/923/634/1051/1960/5169/10875/2621/10457/3280/3162/3398/3543/3566/3624/3902/3956/407975/4602/5819/10062/5063/8654/5896/6441/7057/28526/11326/6935/301/384/79915/857/6352/729230/57126/30835/10666/952/970/972/942/1026/1050/1141/1268/11221/1949/2175/2737/2852/2896/3077/3113/3134/3142/…
GO:0002696	BP	GO:0002696	positive regulation of leukocyte activation	181	0.376197	1.59066	9.999e-05	0.00242704	0.00187151	2910	tags=49%, list=34%, signal=33%	6347/6348/604/11148/64332/29126/958/1803/2534/3109/3115/3559/4436/7099/100/199/558/923/1960/2621/3280/3543/3566/3956/4602/5819/5063/5896/7057/28526/301/79915/857/6352/729230/57126/30835/10666/952/970/972/942/1026/1050/1141/11221/1949/2737/3113/3134/3142/3146/3329/3485/3493/3494/3514/3592/3593/3553/9173/51561/3565/3567/3574/3575/3718/3965/4323/114548/8013/7468/5058/5724/5788/140885/10326/8651/9840…
GO:0002697	BP	GO:0002697	regulation of immune effector process	211	0.381274	1.6225	9.999e-05	0.00242704	0.00187151	1862	tags=36%, list=22%, signal=29%	3075/151636/83666/5627/604/55601/2213/64332/340061/958/3109/3434/3559/4436/91543/5272/7099/2/30817/716/717/718/720/721/728/634/5199/79132/5169/10875/51191/3162/3566/3902/4602/5819/8482/710/54765/11326/7448/301/60489/409/79915/727/729230/57126/911/10666/972/942/1380/23586/11221/2896/3077/3134/3142/3146/3329/5654/3514/3592/3593/8809/8807/3553/51561/3565/3567/3575/11213/3662/3718
GO:0003682	MF	GO:0003682	chromatin binding	197	0.375574	1.59352	9.999e-05	0.00242704	0.00187151	2832	tags=47%, list=33%, signal=32%	604/84515/26471/9768/83990/8318/10036/8208/4436/23397/10360/4998/7703/639/5579/5888/5933/6472/84962/29028/113130/81620/1051/10370/1959/9156/2353/3015/8820/2494/5111/5422/10721/11107/6839/90381/7153/29089/29128/7443/11169/6935/367/80816/26053/221336/57658/8535/23468/983/1058/1164/2078/2146/57697/2735/2737/51053/2852/3005/8357/126961/333932/8353/10014/3159/8091/122953/23135/9314/56917/2956/23310/10…
GO:0004888	MF	GO:0004888	transmembrane signaling receptor activity	446	0.340875	1.47871	9.999e-05	0.00242704	0.00187151	1851	tags=34%, list=21%, signal=28%	84168/5157/19/1952/1524/1950/2213/132014/4914/929/2564/27239/2841/2857/9290/8111/3119/3122/3597/3559/3872/4360/4886/8829/7099/94/30817/558/728/10203/919/1436/1439/10800/4921/2043/2057/2065/2149/9103/338557/2261/2565/2570/387509/2894/3117/3601/3560/3563/3566/3902/59352/57121/4233/4883/5026/5031/11251/5792/6344/10280/6653/6272/7049/7100/8793/7436/90/91/92/93/577/165082/84059/148/118429/187/554/659/…
GO:0005102	MF	GO:0005102	signaling receptor binding	687	0.33352	1.45787	9.999e-05	0.00242704	0.00187151	2900	tags=44%, list=34%, signal=32%	6347/2013/6348/19/29760/414062/1950/11148/3690/4914/11247/4983/6280/133/650/672/1490/79094/3627/2920/1803/2534/83729/3678/4254/3872/5579/64108/6279/5270/7099/2/1636/51816/27018/54718/718/8851/1051/1307/1500/6387/3576/1742/54567/26052/1942/51162/2043/2149/343413/2258/2335/10468/2565/2621/10755/9535/10457/64388/1839/3082/7087/3487/3543/3624/3696/3902/59352/3976/4035/9053/81831/5111/5154/5155/5649/5…
GO:0005126	MF	GO:0005126	cytokine receptor binding	133	0.407268	1.69853	9.999e-05	0.00242704	0.00187151	1835	tags=38%, list=21%, signal=30%	6347/6348/414062/3690/4914/650/3627/2920/83729/3678/4254/27018/6387/3576/3624/3976/10572/7049/7100/8743/9966/7185/7422/92/93/25805/655/387695/727/6367/6352/729230/970/8837/1435/1437/6373/1672/1896/2022/3589/3592/3593/3553/51561/3565/3567/3574/3623/3626
GO:0005524	MF	GO:0005524	ATP binding	587	0.347665	1.51586	9.999e-05	0.00242704	0.00187151	3108	tags=49%, list=36%, signal=34%	9619/91351/4940/19/80216/55601/79659/85441/84515/55930/4914/9088/388228/5244/84239/493/83990/990/4261/23604/2534/23046/3801/4173/4174/4436/89797/4939/4998/5091/5579/5888/8438/83694/10350/9429/6296/94/440/445/29028/23120/57205/478/10396/57198/558/641/699/833/5129/1017/1019/1107/548596/1159/1436/1503/4921/79132/1763/1841/2043/2065/2261/2617/3070/28996/81618/8997/347240/3978/5600/84930/4172/4175/417…
GO:0005694	CC	GO:0005694	chromosome	443	0.385344	1.67165	9.999e-05	0.00242704	0.00187151	2801	tags=48%, list=32%, signal=34%	83666/604/157570/84515/55723/672/8318/10036/8208/2177/9837/51659/8365/55388/4173/4174/4436/4582/23397/4998/23594/7703/23649/5888/5933/5983/7015/79000/641/675/699/113130/1017/1019/81620/1051/64946/55839/55166/79682/387103/1107/10370/64858/1763/8110/51514/1869/146956/2237/84296/8330/8334/3015/8349/8520/3070/4085/4172/4175/4176/54069/27085/4605/54892/10062/79023/55010/5111/23481/10769/10733/5422/107…
GO:0005768	CC	GO:0005768	endosome	333	0.33249	1.43327	9.999e-05	0.00242704	0.00187151	2990	tags=44%, list=35%, signal=30%	9619/84168/151636/19/968/4914/23682/388/340061/91947/929/29126/1649/6764/2534/3109/3115/3119/3122/3127/3665/4360/8829/11156/7099/9744/1636/23621/25825/8938/10203/999/1017/1393/2043/2149/221472/2348/10457/3108/3117/10410/3601/3560/6453/4035/4036/5063/6490/5551/84440/5872/338382/153020/219285/6441/6556/1318/285195/29887/6653/6272/6948/284417/23555/10791/57406/51421/118429/301/408/409/554/274/857/91…
GO:0005773	CC	GO:0005773	vacuole	303	0.346341	1.48934	9.999e-05	0.00242704	0.00187151	3423	tags=55%, list=40%, signal=34%	151636/259307/968/1950/10855/284021/23682/340061/27113/1291/23604/1803/3109/3115/3119/3122/3127/4210/375775/80183/54847/1636/100/51816/290/445/10396/23621/718/10203/4680/1393/1519/1522/8448/59345/2822/3108/3117/10410/81618/4035/4036/5551/338382/8635/6383/6441/6448/6556/6272/8406/6948/284417/203068/7436/8714/57406/288/301/8905/408/245973/534/63827/824/10576/911/972/1203/8895/1512/1513/1520/1521/79…
GO:0005783	CC	GO:0005783	endoplasmic reticulum	697	0.309072	1.35134	9.999e-05	0.00242704	0.00187151	2877	tags=40%, list=33%, signal=29%	871/2052/7162/9619/1545/5627/19/1588/9088/8605/23682/340061/837/284119/1116/1291/9249/342184/2534/3115/3119/3122/3127/3678/8516/11343/8974/375775/5742/91543/55304/9911/54972/445/23120/57205/478/10396/57198/23621/25825/718/720/10203/168448/5199/23562/1307/1277/85301/1299/1522/4051/23109/1742/2043/2161/2261/2335/2348/2353/2621/51280/401494/3117/3162/3429/3433/3486/3487/3488/3490/3601/3638/11015/395…
GO:0005788	CC	GO:0005788	endoplasmic reticulum lumen	131	0.440098	1.83422	9.999e-05	0.00242704	0.00187151	2416	tags=50%, list=28%, signal=37%	871/1291/8974/54972/23621/718/720/5199/1307/1277/85301/1299/1522/2335/2621/51280/3486/3487/3488/3490/3956/11320/5154/5155/8635/6383/6696/8614/7057/23555/7448/81029/11093/11173/54507/8542/632/3491/51148/54982/1303/7373/81578/340267/1289/1435/30001/2200/2322/10272/2882/493869/9563/3270/3592/3593/51561/3913/4241/54587/56034/80310/5329/11098/5799/5768
GO:0005912	CC	GO:0005912	adherens junction	266	0.357553	1.53249	9.999e-05	0.00242704	0.00187151	2533	tags=41%, list=29%, signal=30%	57175/23150/8496/23336/9590/57514/3690/388/58480/5244/726/1803/342184/2934/3678/3655/8516/3801/8829/8470/165904/84962/58504/83478/9564/999/634/10391/1496/1500/4921/2037/2043/2261/3696/54800/4035/143098/5819/90102/10544/22800/171024/7041/7052/9414/64759/7422/8936/87/83543/301/55616/659/824/857/960/928/11135/1013/10518/23332/23603/8895/1466/2017/23191/1601/1674/2022/1969/54751/10979/2274/23769/5569…
GO:0006066	BP	GO:0006066	alcohol metabolic process	148	0.384642	1.61341	9.999e-05	0.00242704	0.00187151	2688	tags=47%, list=31%, signal=33%	9619/1545/26509/19/1645/1646/8644/650/1719/9249/39/1109/1071/1583/3613/3638/5031/5106/6319/81537/6653/6697/158219/7436/10449/31/84532/55902/217/221/8542/1050/54982/27235/51805/1543/1565/84649/1717/57540/10682/10613/2222/2224/2246/8811/2710/2819/2852/3157/3553/3565/8821/117283/3949/114879/151056/5333/5334/23228/122618/5724/5901/145226/130367/6526/8877/6713/6720
GO:0006082	BP	GO:0006082	organic acid metabolic process	486	0.34443	1.49649	9.999e-05	0.00242704	0.00187151	2619	tags=41%, list=30%, signal=30%	1545/259307/1645/1646/501/9435/92126/1950/26471/26227/51268/8605/29968/23428/9806/10157/8644/493/672/23670/54541/8528/1719/84706/11343/8974/5091/5742/6472/6999/7298/10090/9429/39/11332/6296/1109/246/440/445/8704/586/718/833/634/51363/548596/1159/55790/1491/1503/4051/2203/2348/2617/2653/2678/2875/401494/3082/84842/3638/4200/166785/10797/55706/1728/10062/2494/79023/114880/5106/5155/5166/5226/5625/1…
GO:0006259	BP	GO:0006259	DNA metabolic process	419	0.393022	1.7033	9.999e-05	0.00242704	0.00187151	2493	tags=44%, list=29%, signal=33%	151636/83666/604/157570/84515/9768/672/83990/1490/9134/958/8318/990/10036/8208/63967/2187/2177/9837/51659/64785/8365/55388/4173/4174/4436/4998/23594/23649/5888/8438/5983/6241/7015/7298/94/306/164668/79000/641/675/27101/113130/1017/81620/64858/79077/1763/51514/1854/146956/9156/55215/2237/2353/84296/3070/3082/3669/3978/4172/4175/4176/54069/84057/55247/4830/4521/57523/5063/55010/5111/5155/5422/10714…
GO:0006260	BP	GO:0006260	DNA replication	139	0.536453	2.24285	9.999e-05	0.00242704	0.00187151	1654	tags=51%, list=19%, signal=42%	604/157570/84515/9768/672/83990/9134/8318/990/10036/8208/63967/9837/51659/64785/55388/4173/4174/4998/23594/23649/5888/5983/6241/94/641/675/27101/1017/81620/1763/51514/1854/146956/9156/2237/84296/3978/4172/4175/4176/5111/5422/10714/10721/5557/5558/9401/5982/5984/5985/116028/10535/6240/90381/54962/11169/10189/79915/55704/983/201254/1111/10926/29980/79075/79733/57697/26271/2735/51053
GO:0006281	BP	GO:0006281	DNA repair	211	0.440371	1.87399	9.999e-05	0.00242704	0.00187151	2519	tags=50%, list=29%, signal=36%	151636/83666/157570/84515/9768/672/83990/8318/10036/8208/63967/2187/2177/51659/8365/4173/4174/4436/5888/8438/5983/79000/641/675/113130/1017/64858/1763/51514/146956/9156/55215/2237/84296/3978/4172/4175/4176/55247/4521/55010/5111/5422/10714/10721/10213/56852/5889/9401/5982/5984/5985/116028/10535/90381/29089/51377/29128/7374/11169/7516/7832/8555/983/1032/1054/201254/1111/8533/11144/64789/2175/2178/2…
GO:0006629	BP	GO:0006629	lipid metabolic process	523	0.328977	1.43173	9.999e-05	0.00242704	0.00187151	3150	tags=48%, list=37%, signal=33%	9619/1545/19/1645/1646/1588/85441/8605/23682/144110/5244/133/8644/650/672/9249/5168/51171/11343/114884/5091/375775/5742/5933/80183/55304/39/11332/6296/84962/1109/246/718/1019/634/1071/1436/1583/4051/2261/2528/50486/2678/51280/2822/401494/3398/3490/3613/3638/3696/4035/4036/84879/166785/10062/2494/115209/114880/5106/5154/5155/5166/23590/113791/51365/23179/6097/6319/6383/81537/9021/6653/6696/55151/1…
GO:0006869	BP	GO:0006869	lipid transport	139	0.422493	1.76639	9.999e-05	0.00242704	0.00187151	1261	tags=32%, list=15%, signal=28%	9619/80830/19/1645/1588/1950/3690/5244/114884/10350/1636/1109/23120/57205/10396/57198/634/1071/3624/4035/84879/4602/4833/10062/114880/140606/81537/10280/11309/6653/6696/7057/158219/7436/26154/21/8714/31/301/8542/80833/80832/79135/114897/857
GO:0006887	BP	GO:0006887	exocytosis	400	0.380582	1.64717	9.999e-05	0.00242704	0.00187151	2748	tags=46%, list=32%, signal=33%	2162/3959/6348/2212/5627/6414/6678/272/968/1950/2213/10855/3690/284021/6280/340061/440279/929/1116/2934/5579/6279/6402/2/51816/30817/290/306/10396/23621/8938/718/728/634/4680/5199/23406/1393/1522/8448/283849/10875/2335/2621/10755/9535/3043/3082/3162/3566/6453/25840/4318/4973/5154/5155/5175/112476/10213/25797/8635/5414/710/27180/6556/6518/6590/80725/8676/54843/8407/374403/7057/7078/7273/203068/742…
GO:0006897	BP	GO:0006897	endocytosis	359	0.331254	1.4306	9.999e-05	0.00242704	0.00187151	3332	tags=51%, list=39%, signal=32%	3959/6347/2212/54453/6678/19/1950/2213/3690/4983/58480/133/929/5168/2534/2934/4360/7099/199/246/306/558/717/718/720/721/10203/919/923/634/3576/1742/26052/5169/54874/2348/2621/3043/7087/3543/3601/3560/6453/4035/4036/4233/4830/10062/5031/29763/5175/338382/6441/6614/6556/29887/6653/6272/8406/85439/55333/7052/7057/28526/7422/7436/7448/8936/301/8862/8542/407/408/409/274/857/9332/57126/50489/30835/928/…
GO:0006915	BP	GO:0006915	apoptotic process	800	0.365933	1.60237	9.999e-05	0.00242704	0.00187151	2876	tags=46%, list=33%, signal=33%	6347/3437/6348/1545/1831/9590/347902/50650/604/1524/4914/26471/388/6280/133/8644/358/27113/650/672/51063/84674/837/1490/929/29126/958/79094/1116/3627/23604/1649/54541/55840/2534/2934/2537/3559/83729/3665/3678/3655/4254/23263/4436/4582/8829/7703/22822/57580/5579/6279/5272/7015/7099/677/100/199/79658/440/558/23621/9564/597/27018/90427/675/699/728/825/1019/8851/4680/1051/10370/1436/1491/1522/6387/22…
GO:0006935	BP	GO:0006935	chemotaxis	317	0.349325	1.50405	9.999e-05	0.00242704	0.00187151	2545	tags=40%, list=29%, signal=30%	6347/57175/55715/5142/6348/414062/1524/1588/3690/4914/4983/6280/3627/2920/23604/5168/2534/2841/8829/57580/6279/347733/30817/199/9564/728/8851/1436/6387/3576/10800/1942/1959/1960/2043/2621/10457/1839/3082/59352/4035/4233/4897/5154/5155/11251/5872/5649/54538/10500/8482/6441/7057/7422/7436/3730/301/7984/409/627/655/659/387695/727/6367/6352/3491/729230/972/112616/1435/6373/23191/1672/9732/1843/1907/1…
GO:0006952	BP	GO:0006952	defense response	757	0.386527	1.69224	9.999e-05	0.00242704	0.00187151	1862	tags=35%, list=22%, signal=30%	3959/6347/3075/3437/6348/151636/8519/4940/83666/5627/80216/604/29760/414062/968/9435/1524/1588/55601/2213/132014/4600/64332/26471/8605/6280/57823/340061/133/650/837/929/958/1116/4261/3627/2920/54541/1803/2113/2177/2534/115361/8111/2934/3115/3119/3122/3127/2537/3434/3559/3665/4210/11343/4360/4582/4939/54625/639/5742/91543/64108/6279/6335/5272/6472/6775/7099/54210/79865/10100/2/100/30817/84632/199/…
GO:0006954	BP	GO:0006954	inflammatory response	383	0.398218	1.72209	9.999e-05	0.00242704	0.00187151	2413	tags=43%, list=28%, signal=32%	6347/3075/6348/5627/604/29760/414062/968/9435/1588/2213/132014/64332/26471/8605/6280/133/650/837/929/958/1116/4261/3627/2920/2113/2177/8111/3559/4210/11343/5742/6279/6335/7099/54210/10100/2/100/30817/84632/199/246/445/558/25825/716/717/718/720/721/728/10203/923/1051/5199/1393/1436/3576/10800/5169/2161/2149/338557/2335/2353/2678/3082/3162/3487/3566/4035/4318/22861/9111/10062/4973/8482/710/6614/655…
GO:0006974	BP	GO:0006974	cellular response to DNA damage stimulus	342	0.395864	1.70709	9.999e-05	0.00242704	0.00187151	2942	tags=50%, list=34%, signal=34%	151636/83666/604/157570/84515/26471/9768/672/83990/8318/10036/8208/63967/1649/54541/2187/2177/51659/8365/3665/55388/4173/4174/4436/4582/5888/8438/5983/79000/597/641/675/113130/1017/6387/64858/220042/1763/51514/1869/146956/9156/55215/2237/84296/28996/3162/3978/84930/4172/4175/4176/55247/4521/55010/5111/10769/5422/10714/10721/23645/10213/56852/5889/9401/5982/5984/5985/116028/10535/6446/6839/7027/90…
GO:0006979	BP	GO:0006979	response to oxidative stress	185	0.388191	1.64298	9.999e-05	0.00242704	0.00187151	2380	tags=43%, list=28%, signal=32%	1545/6414/2034/388/8644/358/1719/2113/2177/2534/7703/5742/7099/100/199/558/1017/1277/1894/2119/2353/3043/3082/3162/4151/9833/4233/4318/4602/1728/4521/5111/5625/143686/10110/10280/23657/6546/8614/221/301/468/655/694/824/952/983/8837/1536/54205/50506/1843/8288/30001/2146/10516/2686/51022/2882/493869/3240/8807/26034/3741/23135/9314/4323/4689/4700/10276/51314/4929/8013/5074/80310/5159/65018/59338/544…
GO:0007010	BP	GO:0007010	cytoskeleton organization	610	0.337758	1.47346	9.999e-05	0.00242704	0.00187151	2898	tags=44%, list=34%, signal=31%	6347/57175/2013/84168/6348/23336/604/4606/4983/9768/388/58480/6280/7280/358/672/1490/10602/342184/6624/2934/3872/8829/57580/6279/285590/57698/8470/11346/347733/51175/165904/81569/199/84962/246/154810/79658/348110/79000/9564/675/825/168448/1017/8851/387103/100653515/1107/10391/23406/1436/1496/6387/1894/2036/2037/221472/2258/9535/347240/54800/4035/4085/4133/9053/22924/4233/4605/58529/10529/5819/485…
GO:0007015	BP	GO:0007015	actin filament organization	189	0.386477	1.63728	9.999e-05	0.00242704	0.00187151	2708	tags=46%, list=31%, signal=32%	57175/2013/4606/388/58480/1490/10602/342184/6624/2934/8829/57580/285590/57698/8470/11346/165904/199/246/348110/9564/10391/23406/1496/6387/9535/4233/10529/5063/90102/130271/389/201191/171024/29767/7273/8936/87/83543/395/7984/408/55616/10677/274/822/11135/148170/23332/23603/2017/23191/81624/1809/221061/8522/8477/3092/3383/283284/3693/133746/11133/10787/4739/5058/5074/221692/5358/5629/5734/10411/592…
GO:0007049	BP	GO:0007049	cell cycle	782	0.377192	1.65171	9.999e-05	0.00242704	0.00187151	2917	tags=47%, list=34%, signal=34%	6347/604/1950/157570/84515/4600/26471/9768/26227/9088/388/58480/7280/493/650/672/83990/1490/9134/993/8318/990/10036/8208/63967/1649/1719/2177/2669/9837/55388/4173/4174/4436/4582/23397/4998/23594/7703/22822/23649/5579/5888/8438/5933/5983/6241/7015/347733/51175/7298/677/81569/84632/199/84962/440/79000/586/641/675/699/825/168448/113130/5129/1017/1019/8851/81620/55166/387103/100653515/1107/10370/1163…
GO:0007155	BP	GO:0007155	cell adhesion	760	0.348582	1.52609	9.999e-05	0.00242704	0.00187151	2411	tags=39%, list=28%, signal=31%	3959/6347/2013/7162/84168/1545/8496/347902/604/1952/1524/2213/11148/10855/3690/3914/4606/64332/388/6280/57823/9806/650/1490/29126/1291/1803/2113/342184/2534/2934/3109/3115/3559/3678/3655/8516/3801/4254/4582/8829/57580/6279/6402/5270/23145/677/94/100/30817/199/84962/246/306/445/558/9564/923/999/8851/634/4680/1051/10370/9069/23562/1307/1277/10391/1496/1500/6387/3576/4921/1742/1942/51162/1960/2043/2…
GO:0007159	BP	GO:0007159	leukocyte cell-cell adhesion	184	0.418428	1.77056	9.999e-05	0.00242704	0.00187151	2910	tags=53%, list=34%, signal=36%	6347/604/1524/2213/11148/64332/6280/29126/1803/2113/2534/3109/3115/3559/3678/6279/6402/100/199/445/923/634/1051/6387/1960/10875/10457/3280/3566/3902/3956/4602/5063/8654/5175/5896/6441/11326/301/384/655/857/6352/729230/57126/30835/960/970/972/942/51148/10332/11221/1949/2737/3077/3113/3142/3146/3329/3383/3485/3592/3593/3553/51561/3565/3574/3575/3683/3695/3718/9314/3965/10725/114548/8013/4907/5058/5…
GO:0007167	BP	GO:0007167	enzyme linked receptor protein signaling pathway	469	0.329568	1.43074	9.999e-05	0.00242704	0.00187151	2701	tags=42%, list=31%, signal=30%	26509/5157/29760/1950/3690/4914/650/1490/57530/54541/2534/2537/83729/3678/8516/8829/5579/11156/94/84632/10566/558/9564/1019/8851/634/10370/1277/1436/4921/1942/1978/2043/2065/79633/2261/2348/2353/100132074/10468/2621/10755/2822/64388/1839/3280/3082/28996/3486/3487/3488/3624/6453/8997/3976/4035/4036/5600/4233/407975/4318/5063/5046/5154/5155/5166/5792/6383/143686/9021/6653/6272/10253/7041/7049/7057/…
GO:0007186	BP	GO:0007186	G protein-coupled receptor signaling pathway	426	0.332831	1.4428	9.999e-05	0.00242704	0.00187151	3099	tags=48%, list=36%, signal=32%	6347/5142/6348/5157/19/9590/1646/50650/414062/1952/1524/11247/388/133/8644/493/3627/2920/2564/27239/2841/2857/9290/8111/23263/11343/4886/57580/100/30817/8938/9564/718/728/760/10203/8851/6387/3576/10800/1894/2149/338557/221472/2565/2570/10755/387509/6453/8997/59352/57121/4035/4233/4883/84033/5031/11251/9628/389/6344/10280/6272/7052/29767/57406/577/165082/84059/79924/148/301/8862/187/9828/26084/798…
GO:0007264	BP	GO:0007264	small GTPase mediated signal transduction	275	0.398759	1.71136	9.999e-05	0.00242704	0.00187151	2708	tags=47%, list=31%, signal=33%	54453/19/57514/50650/604/4914/4983/57480/23682/388/58480/10602/2841/9290/4254/23263/8829/57580/23362/25780/121268/6236/57698/117289/2/199/79658/58504/83478/55701/1017/139818/23348/1894/2057/2149/2203/221472/10750/57493/3162/128239/6453/8997/5600/4233/4853/84033/5175/26030/10769/5872/338382/153020/10235/5649/23179/389/22800/10253/90627/50861/55333/8936/148/84986/395/64333/9828/26084/7984/408/26053…
GO:0007265	BP	GO:0007265	Ras protein signal transduction	211	0.407524	1.73421	9.999e-05	0.00242704	0.00187151	2509	tags=46%, list=29%, signal=33%	19/50650/604/4914/4983/57480/23682/388/58480/10602/2841/9290/4254/23263/8829/57580/23362/25780/57698/199/55701/1017/1894/2057/2149/2203/221472/10750/57493/128239/6453/8997/5600/4233/4853/84033/5175/26030/10769/5872/338382/10235/389/22800/10253/50861/55333/8936/148/395/9828/26084/7984/408/26053/11135/148170/1026/1435/8727/23191/27128/79930/2151/9002/10160/121512/2305/2828/8477/23096/440073/23101/1…
GO:0007346	BP	GO:0007346	regulation of mitotic cell cycle	283	0.354106	1.51989	9.999e-05	0.00242704	0.00187151	1918	tags=36%, list=22%, signal=29%	6347/604/1950/9088/672/993/8318/990/63967/4436/4582/4998/5933/7015/677/84632/199/440/641/675/699/168448/113130/1017/1019/81620/1163/64858/220042/51514/1869/1978/146956/10457/3280/3398/4085/27085/5111/5155/10769/10733/10213/5889/54908/7027/90381/54962/7153/203068/10537/7480/55055/11130/9510/301/79915/655/79866/84446/685/694/7832/9184/8555/995/983/1021/1026/1028/1032/55835/22995/79959/1111/9793/116…
GO:0007596	BP	GO:0007596	blood coagulation	147	0.381179	1.59805	9.999e-05	0.00242704	0.00187151	1730	tags=35%, list=20%, signal=28%	2162/5627/10855/3690/958/2534/23764/5579/5270/7099/2/558/634/1277/139818/23348/2161/2149/2621/3043/5026/5154/5155/10544/5889/710/23657/7057/7448/11093/408/409/114897/857/23468/57126/928/1606/57572/2151/9002/2152/2192/2769/54331/2815/8357/126961/333932/8353/3045
GO:0007599	BP	GO:0007599	hemostasis	149	0.382252	1.60357	9.999e-05	0.00242704	0.00187151	1730	tags=35%, list=20%, signal=28%	2162/5627/10855/3690/958/2534/23764/5579/5270/7099/2/558/634/1277/139818/23348/2161/2149/2621/3043/5026/5154/5155/10544/5889/710/23657/7057/7448/11093/408/409/554/114897/857/23468/57126/928/1606/57572/2151/9002/2152/2192/2769/54331/2815/8357/126961/333932/8353/3045
GO:0008047	MF	GO:0008047	enzyme activator activity	204	0.381441	1.62064	9.999e-05	0.00242704	0.00187151	3376	tags=59%, list=39%, signal=37%	6348/151636/54453/57514/1950/26471/4983/259173/650/23397/8829/57580/25780/285590/117289/23158/9744/84632/79658/58504/83478/27018/8851/1163/1894/2065/2258/2335/2621/9535/3486/6453/22861/5155/23645/10213/9628/9644/10253/90627/374403/9882/55803/577/141/10598/389658/241/84986/395/64333/408/55616/113451/857/6352/1026/8837/1164/1512/10926/9732/10144/2192/345611/654817/4689/4763/3084/9141/65018/5364/590…
GO:0008144	MF	GO:0008144	drug binding	705	0.345963	1.51311	9.999e-05	0.00242704	0.00187151	3036	tags=47%, list=35%, signal=33%	9619/1545/91351/4940/19/80216/1588/55601/79659/85441/84515/55930/4914/9088/388228/340061/5244/84239/493/83990/990/1116/4261/23604/1719/6624/2534/84706/23046/3801/4173/4174/4436/89797/4939/4998/5091/5480/5579/5888/8438/83694/6472/55304/6999/7298/10350/9429/1636/6296/94/440/445/29028/23120/57205/478/10396/57198/558/641/699/833/5129/1017/1019/1107/548596/1159/1436/1491/1503/4921/79132/1763/1841/2043…
GO:0008284	BP	GO:0008284	positive regulation of cell proliferation	442	0.349126	1.5145	9.999e-05	0.00242704	0.00187151	2945	tags=46%, list=34%, signal=32%	2013/1646/604/1524/1950/11148/10855/3690/378938/133/8644/358/650/1490/29126/958/990/3627/1803/2113/3109/3115/3559/4254/8829/6472/7015/7099/94/100/199/728/10203/923/1017/1019/4680/1436/1522/6387/4921/54567/1869/51162/1960/2065/2119/2149/2261/2335/2621/1839/3280/28996/3162/3398/3488/128239/3976/4036/407975/4318/4602/4830/4853/128506/5031/5154/5155/6474/7049/7052/7057/54962/64759/7422/7480/9510/301/…
GO:0008285	BP	GO:0008285	negative regulation of cell proliferation	326	0.339249	1.46174	9.999e-05	0.00242704	0.00187151	2913	tags=43%, list=34%, signal=30%	6347/3437/1545/8519/6678/604/414062/2213/4914/26471/133/650/83990/29126/990/55840/2113/3559/5270/7015/94/199/675/162681/634/1051/1436/3576/54567/1869/5169/2149/2822/10457/8334/3280/3162/3398/3486/3488/3490/3624/3976/5600/407975/27085/4830/4883/8654/11251/6441/10253/8406/55333/7027/7041/7049/7057/22846/11326/7480/6935/9510/148/8862/367/384/84913/655/659/694/7832/857/135228/942/928/1021/1026/1028/1…
GO:0009607	BP	GO:0009607	response to biotic stimulus	449	0.386555	1.67672	9.999e-05	0.00242704	0.00187151	1871	tags=36%, list=22%, signal=30%	6347/3437/5142/6348/151636/8519/4940/83666/6678/19/9590/968/1524/55601/2213/4600/6280/340061/133/650/929/29126/958/3627/2920/1649/54541/115361/55008/2537/3434/3559/3665/4360/4939/91543/64108/6279/5272/7099/306/164668/445/558/116071/55509/718/721/728/923/1019/634/1051/5199/23406/1439/6387/3576/79132/146956/2149/10875/2353/2634/2678/8349/51191/3429/10964/3433/24138/10410/3543/3566/3669/23658/5600/4…
GO:0009611	BP	GO:0009611	response to wounding	316	0.388588	1.67281	9.999e-05	0.00242704	0.00187151	1931	tags=38%, list=22%, signal=30%	2162/57175/26509/5627/6678/1524/10855/3690/4914/133/1490/958/1719/2113/2534/2934/3678/23764/8829/5579/349667/6279/5270/7099/677/2/94/199/84962/246/558/825/634/1277/139818/23348/2043/2065/2161/2149/2335/2348/2621/3043/1839/3162/3956/59352/4035/58529/5026/5154/5155/5175/90102/51090/10544/5792/5889/389/710/6556/23657/6696/7057/22846/7448/7480/81029/11093/301/408/409/114897/857/23468/3491/729230/1352…
GO:0009615	BP	GO:0009615	response to virus	151	0.447266	1.87737	9.999e-05	0.00242704	0.00187151	1847	tags=42%, list=21%, signal=33%	3437/151636/8519/4940/83666/55601/4600/340061/958/3627/54541/2537/3434/3559/3665/4939/91543/64108/164668/55509/6387/79132/10875/51191/3429/10964/3433/24138/10410/3669/5600/4599/4938/10622/51728/5551/6773/54765/59/140564/60489/10018/602/6367/6352/50489/1021/1543/23586/50506/3159/8091/5654/10561/64135/3459/3592/3593/3553/51561/11213/10379/345611
GO:0009617	BP	GO:0009617	response to bacterium	304	0.345873	1.48753	9.999e-05	0.00242704	0.00187151	2877	tags=44%, list=33%, signal=30%	6347/5142/6348/6678/19/9590/968/1524/2213/6280/133/650/929/29126/3627/2920/115361/55008/4360/4939/6279/5272/7099/306/445/558/718/721/728/923/1019/1051/5199/1439/3576/79132/2149/2353/2634/2678/8349/3543/23658/4502/22861/10062/6441/6556/6590/7100/28526/11093/384/602/387695/84419/824/857/6352/4064/942/1053/8837/129607/1268/1690/1437/6373/1543/1672/11221/1969/8288/27086/2358/163351/2679/55970/2896/30…
GO:0009628	BP	GO:0009628	response to abiotic stimulus	566	0.316166	1.37774	9.999e-05	0.00242704	0.00187151	2525	tags=37%, list=29%, signal=28%	26509/6678/1831/9590/8553/2034/378938/4914/9768/388/133/358/493/650/672/83990/1490/929/958/993/1116/3627/54541/1803/2113/2177/2534/8111/4436/5888/8438/5270/11346/85461/7015/7099/677/94/100/199/84962/360/440/8704/23621/641/90427/675/760/768/784/825/1019/10370/1277/64506/6387/51514/1869/1894/1978/2237/2353/2822/28996/3162/3398/3490/4055/9053/4151/4602/55706/1728/79023/5111/10714/10213/56852/5896/62…
GO:0009636	BP	GO:0009636	response to toxic substance	238	0.377138	1.61141	9.999e-05	0.00242704	0.00187151	2877	tags=47%, list=33%, signal=32%	2052/6348/1545/6678/4914/26471/388/6280/23428/358/83990/929/1719/2113/2534/2934/7703/5742/6279/6335/7298/9429/100/440/445/558/999/1019/1277/1393/1894/1978/2353/3043/3082/3162/4151/4233/4502/4602/1728/5111/5155/10213/10280/23657/6546/25841/11093/241/301/468/632/642/655/824/6352/983/1026/8973/1141/51208/1193/1268/1536/1543/1815/50506/1843/8288/2146/10516/51022/2882/493869/3045/3042/3240/3248/3383/8…
GO:0009719	BP	GO:0009719	response to endogenous stimulus	698	0.33534	1.46621	9.999e-05	0.00242704	0.00187151	2917	tags=43%, list=34%, signal=31%	6347/57175/5142/9619/6678/19/1645/1646/968/1524/2213/4914/133/8644/358/493/650/672/83990/837/1490/990/57530/1291/54541/2113/114907/2534/8516/5579/5888/6472/6775/7099/7298/677/94/199/1109/306/440/445/478/23621/9564/641/760/768/773/27101/999/1019/8851/634/1051/10370/1307/1277/64506/153222/1393/6387/3576/1583/54567/1869/1959/1960/1978/146956/2043/79633/2261/2348/2353/100132074/10468/2678/10755/2822/…
GO:0009725	BP	GO:0009725	response to hormone	413	0.331771	1.43703	9.999e-05	0.00242704	0.00187151	3036	tags=46%, list=35%, signal=31%	9619/6678/1645/1646/133/8644/358/493/672/83990/1490/990/54541/2113/114907/2534/5579/6775/7298/677/199/1109/306/440/445/478/9564/760/768/27101/1019/8851/634/1277/64506/153222/1393/6387/1583/1959/1978/2353/100132074/2678/2822/3015/3488/3490/3624/4151/4830/1728/10062/2494/5031/5106/5111/5166/5872/6097/143686/9021/6653/6272/6696/6773/8614/9882/7041/7049/7057/7078/8743/7480/7533/21/31/148/301/367/409/…
GO:0009897	CC	GO:0009897	external side of plasma membrane	194	0.390787	1.65722	9.999e-05	0.00242704	0.00187151	1850	tags=37%, list=21%, signal=29%	2217/9619/84168/19/1524/2213/11148/929/29126/958/3627/3597/3559/3678/3655/349667/5270/7099/1636/100/290/54718/923/6387/5169/343413/2348/57493/3543/3560/3563/3902/4036/4897/5175/8482/7049/7057/28526/118429/301/11119/10384/824/729230/9332/911/30835/10666/972/942/925/928/1141/2022/2152/2675/2690/3077/3134/3383/3493/3494/3514/3590/3593/9173/3561/133396/3575/3672
GO:0009967	BP	GO:0009967	positive regulation of signal transduction	748	0.359157	1.57192	9.999e-05	0.00242704	0.00187151	2569	tags=42%, list=30%, signal=32%	6347/2013/6348/1545/83666/9590/1646/80216/29760/414062/1524/55601/79659/1950/2213/10855/3690/4914/26471/6280/8644/27113/650/837/1490/929/958/1116/1649/2534/2841/9290/2934/83729/3665/3678/8516/4254/8829/54625/5579/11156/91543/6279/7015/7099/94/100/84632/84962/246/558/90427/718/728/784/10370/1277/153222/1436/1491/79132/1742/54567/1848/1869/1894/1942/2043/2057/2065/2149/338557/221472/2261/50486/4616…
GO:0009968	BP	GO:0009968	negative regulation of signal transduction	530	0.318916	1.38801	9.999e-05	0.00242704	0.00187151	2823	tags=42%, list=33%, signal=30%	604/1524/1950/2213/133/493/650/672/929/79094/1649/54541/115265/9249/2534/2537/3655/4582/8829/54625/7703/5579/5270/7015/7099/100/84962/597/634/153222/1393/1491/1500/6387/3576/220042/79132/54567/1844/1848/1942/51162/2065/2203/10468/2621/64388/1839/57493/3082/28996/3162/3486/3487/3488/3638/3976/4035/4036/4233/407975/4318/58529/10062/113791/23645/10213/338382/27303/9628/54894/143686/153769/9021/6653/…
GO:0009986	CC	GO:0009986	cell surface	465	0.375682	1.6309	9.999e-05	0.00242704	0.00187151	2888	tags=47%, list=33%, signal=33%	2013/2217/7162/9619/84168/6678/19/1524/2213/11148/3690/4914/650/726/929/29126/958/3627/1803/3115/3122/3597/3559/3678/3655/8516/4360/8829/349667/64108/5270/7099/79865/1636/94/100/290/558/23621/8927/54718/718/728/923/999/634/4680/1436/1522/6387/51162/5169/2043/2149/343413/2261/2348/1839/57493/3108/3543/3601/3560/3563/3679/3696/3757/3902/3956/4036/4233/5819/4853/4897/5046/5154/5155/5175/10544/6383/8…
GO:0010035	BP	GO:0010035	response to inorganic substance	247	0.38742	1.657	9.999e-05	0.00242704	0.00187151	2957	tags=50%, list=34%, signal=34%	1545/6414/6678/4914/388/8644/358/493/929/1719/2113/2534/2934/7703/6279/7015/100/246/360/445/558/23621/641/760/27101/825/999/1017/1019/1277/1393/1742/1841/1894/2203/2353/2822/3043/3082/3162/3398/4151/4233/4318/4502/4602/1728/4521/5111/10235/140606/10280/6546/7057/7273/11093/84059/241/288/301/468/632/655/824/857/928/983/1050/8837/8895/1437/1536/79901/1543/1843/1917/2146/10516/10272/51022/3077/3157/…
GO:0010243	BP	GO:0010243	response to organonitrogen compound	395	0.349228	1.5111	9.999e-05	0.00242704	0.00187151	2877	tags=44%, list=33%, signal=31%	5142/6678/19/968/2213/133/358/493/672/83990/837/1490/990/1291/1719/2534/2934/4837/5579/5888/6472/6775/7099/7298/677/100/199/440/445/478/23621/9564/641/728/760/773/27101/999/1019/634/1051/1307/1277/64506/1393/6387/1583/1959/1978/2043/2348/2353/100132074/2822/3488/3843/4035/4318/22861/4830/5026/5031/5106/5111/5166/5872/143686/6546/9021/6653/6272/6773/8614/9882/7049/55151/8743/7480/6935/11093/9472/3…
GO:0010562	BP	GO:0010562	positive regulation of phosphorus metabolic process	515	0.348327	1.51527	9.999e-05	0.00242704	0.00187151	2411	tags=39%, list=28%, signal=30%	6347/2013/6348/83666/9590/414062/1524/1950/2213/3690/4914/26471/23682/493/650/1490/958/990/1116/63967/5168/2534/9290/83729/3678/3655/4254/8829/54625/7099/1636/94/84632/199/84962/246/718/728/8851/1163/1436/4921/1742/1848/1894/1942/2043/2065/2149/338557/221472/2258/2261/4616/2621/2822/10457/1839/3280/3082/28996/3486/3487/3624/128239/6453/3976/4035/4055/5600/22924/4318/54892/4853/5031/5063/8654/5154…
GO:0010564	BP	GO:0010564	regulation of cell cycle process	322	0.344958	1.48591	9.999e-05	0.00242704	0.00187151	1918	tags=35%, list=22%, signal=28%	6347/604/1950/9088/493/672/1490/993/8318/990/63967/4582/4998/7703/5888/5933/6241/7015/677/199/641/675/699/168448/113130/1017/1019/8851/81620/100653515/51514/1869/1894/2237/10755/10457/3398/3976/4085/27085/5111/5155/10769/10733/25886/10213/84440/5889/116028/54908/7027/90381/54962/203068/10537/7480/9510/301/79915/274/655/79866/84446/685/7832/9184/387695/23468/8555/995/983/1021/1026/1028/1032/55835/…
GO:0010648	BP	GO:0010648	negative regulation of cell communication	580	0.311105	1.35624	9.999e-05	0.00242704	0.00187151	2905	tags=42%, list=34%, signal=30%	604/1524/1950/2213/133/493/650/672/929/79094/1649/54541/115265/9249/2534/2537/3655/4582/8829/54625/7703/5579/5270/7015/7099/100/84962/597/634/153222/1393/1491/1500/6387/3576/220042/79132/54567/1844/1848/1942/51162/2065/2203/10468/2621/64388/1839/57493/3082/28996/3162/3486/3487/3488/3624/3638/8997/3976/4035/4036/4233/407975/4318/58529/10062/113791/10769/23645/10213/338382/27303/9628/54894/143686/1…
GO:0010941	BP	GO:0010941	regulation of cell death	706	0.373275	1.63258	9.999e-05	0.00242704	0.00187151	1876	tags=36%, list=22%, signal=30%	6347/3437/6348/1545/1831/9590/347902/50650/604/1524/2213/4914/26471/388/6280/133/8644/358/27113/650/672/51063/84674/837/1490/29126/958/3627/23604/1649/54541/2534/2934/2537/83729/3665/3678/3655/4254/23263/4436/4582/8829/7703/57580/6279/5272/7015/7099/677/100/199/79658/440/558/23621/9564/597/27018/90427/728/27101/825/1019/8851/4680/1051/10370/1436/1491/1522/6387/220042/1848/1869/1894/1942/1960/2065…
GO:0010942	BP	GO:0010942	positive regulation of cell death	318	0.415356	1.78855	9.999e-05	0.00242704	0.00187151	2410	tags=46%, list=28%, signal=34%	6347/6348/1545/9590/50650/604/2213/4914/26471/388/6280/133/8644/27113/650/51063/837/1490/29126/958/1649/54541/2534/2934/3655/23263/57580/6279/7099/23621/27018/90427/1019/8851/1522/1848/1869/1894/2149/221472/2353/50486/4616/2822/3043/3162/3433/3486/3624/81618/6453/8997/4035/4055/9833/4318/4602/4605/22861/1728/84033/5063/5625/5414/6272/8406/7027/7052/7057/7078/8743/9966/7153/10537/7480/7533/54507/3…
GO:0014070	BP	GO:0014070	response to organic cyclic compound	396	0.357798	1.54809	9.999e-05	0.00242704	0.00187151	3018	tags=47%, list=35%, signal=32%	6347/2052/5142/6348/1545/6678/19/340061/5244/133/8644/358/493/650/672/1490/3627/54541/1719/2113/114907/2934/3434/3655/5888/6472/7298/677/100/199/306/360/440/445/478/641/760/768/999/1019/1051/1277/153222/1393/1848/1978/2348/2353/2678/2822/3015/3488/3490/3624/3638/3956/4830/1728/10062/2494/5026/5031/5063/5106/5111/5155/6097/6520/23657/6546/6696/8614/7041/7057/55151/7480/7533/21/9472/301/367/409/468…
GO:0015629	CC	GO:0015629	actin cytoskeleton	259	0.353053	1.51208	9.999e-05	0.00242704	0.00187151	3008	tags=47%, list=35%, signal=32%	57175/55917/793/4606/55930/4983/58480/5244/10602/57530/342184/6624/2534/2934/10360/285590/8470/11346/165904/81569/199/9564/90427/8436/999/55166/10391/23406/1496/4921/2037/2634/9535/24138/6453/8997/57644/58529/55706/10529/130271/201191/9644/80725/171024/29767/7273/8936/31/59/87/84517/83543/301/10297/395/7984/26053/10677/274/794/800/822/824/10518/23603/2017/23586/1809/54751/10979/8522/55970/3005/90…
GO:0016032	BP	GO:0016032	viral process	299	0.351186	1.50982	9.999e-05	0.00242704	0.00187151	2864	tags=44%, list=33%, signal=30%	6347/3075/6348/8519/4940/1524/2213/3690/340061/1803/2534/2934/3122/3434/3665/3678/4360/5091/5933/91543/7298/290/164668/558/699/919/79682/1436/6387/3576/79132/2621/28996/3429/24138/10410/3560/3843/3669/6453/3956/4055/4599/55706/5819/22861/2494/79023/4938/5111/5422/84440/10572/6510/6590/6773/6839/7153/7374/91703/10189/8905/140564/60489/10018/274/857/23468/6352/729230/30835/972/942/995/983/1050/1058…
GO:0016462	MF	GO:0016462	pyrophosphatase activity	382	0.384887	1.66425	9.999e-05	0.00242704	0.00187151	2974	tags=50%, list=34%, signal=34%	9619/91351/19/55601/79659/85441/84515/4600/55930/23682/388/58480/7280/5244/84239/493/83990/8318/57530/5168/115361/2669/9837/51659/23046/3801/4173/4174/4436/89797/5888/8438/5983/121268/6236/347733/51175/10350/9429/10123/29028/478/10396/641/1107/79077/79132/1763/26052/1854/5169/2617/2634/84296/3070/347240/4172/4175/4176/166785/4599/57644/4521/10721/5872/338382/56852/5889/9401/5982/5984/5985/9628/38…
GO:0016477	BP	GO:0016477	cell migration	730	0.354895	1.55287	9.999e-05	0.00242704	0.00187151	2885	tags=44%, list=33%, signal=32%	6347/57175/2013/5142/6348/1545/8519/83666/5627/6678/9590/414062/1524/1588/1950/3690/3914/4983/388/6280/8140/23428/56271/650/1490/29126/958/3627/2920/23604/54541/1803/5168/2113/6624/2534/2841/3678/3655/4254/8829/57580/11156/6279/6402/5270/57698/7015/54210/347733/1636/94/100/30817/199/84962/154810/306/348110/10396/558/9564/728/999/8851/634/4680/10370/1277/1436/1496/6387/3576/4921/54567/1942/1960/20…
GO:0016772	MF	GO:0016772	transferase activity, transferring phosphorus-containing groups	340	0.330587	1.42533	9.999e-05	0.00242704	0.00187151	2382	tags=37%, list=28%, signal=28%	6347/6348/4940/5157/80216/4914/9088/388228/9134/4261/23604/2534/8829/4939/23649/5579/83694/7015/94/558/699/5129/1017/1019/8851/548596/1159/1436/4921/1841/2043/2065/2261/28996/8997/5600/84930/9833/4233/4830/4833/54981/4938/84033/5063/5166/91461/10769/10733/5422/10714/10721/10622/51728/5557/5558/6446/10110/7049/9414/7083/7273/7443/9625/90/91/92/93/205/57538/659/84446/8536/6352/901/79616/10849/55561…
GO:0016817	MF	GO:0016817	hydrolase activity, acting on acid anhydrides	383	0.383797	1.65973	9.999e-05	0.00242704	0.00187151	2974	tags=50%, list=34%, signal=34%	9619/91351/19/55601/79659/85441/84515/4600/55930/23682/388/58480/7280/5244/84239/493/83990/8318/57530/5168/115361/2669/9837/51659/23046/3801/4173/4174/4436/89797/5888/8438/5983/121268/6236/347733/51175/10350/9429/10123/29028/478/10396/641/1107/79077/79132/1763/26052/1854/5169/2617/2634/84296/3070/347240/4172/4175/4176/166785/4599/57644/4521/10721/5872/338382/56852/5889/9401/5982/5984/5985/9628/38…
GO:0016818	MF	GO:0016818	hydrolase activity, acting on acid anhydrides, in phosphorus-containing anhydrides	383	0.383797	1.65973	9.999e-05	0.00242704	0.00187151	2974	tags=50%, list=34%, signal=34%	9619/91351/19/55601/79659/85441/84515/4600/55930/23682/388/58480/7280/5244/84239/493/83990/8318/57530/5168/115361/2669/9837/51659/23046/3801/4173/4174/4436/89797/5888/8438/5983/121268/6236/347733/51175/10350/9429/10123/29028/478/10396/641/1107/79077/79132/1763/26052/1854/5169/2617/2634/84296/3070/347240/4172/4175/4176/166785/4599/57644/4521/10721/5872/338382/56852/5889/9401/5982/5984/5985/9628/38…
GO:0016887	MF	GO:0016887	ATPase activity	164	0.395274	1.6655	9.999e-05	0.00242704	0.00187151	3315	tags=62%, list=38%, signal=39%	9619/19/79659/5244/84239/493/23046/3801/4174/4436/5888/8438/5983/10350/9429/29028/478/10396/641/1107/1763/347240/4175/4176/10721/56852/5889/5982/5984/5985/7153/7516/26154/21/8714/225/79915/491/516/245973/534/57571/10212/11144/146754/79075/54821/63979/3306/3310/3329/63971/56992/547/3835/11004/24137/221458/3833/4171/2956/4643/4647/5702/5890/25788/8458/10349/79963/154664/20/23461/23460/10347/23456/2…
GO:0017076	MF	GO:0017076	purine nucleotide binding	764	0.347821	1.52272	9.999e-05	0.00242704	0.00187151	3119	tags=48%, list=36%, signal=34%	5142/9619/91351/4940/19/80216/55601/79659/85441/84515/4600/55930/4914/9088/23682/388/58480/388228/340061/7280/5244/84239/493/83990/990/4261/23604/2534/115361/2669/23046/3801/4173/4174/4436/89797/4939/4998/5091/5579/5888/8438/121268/83694/6236/347733/51175/10350/9429/11332/6296/94/10123/440/445/29028/23120/57205/478/10396/57198/558/641/699/833/5129/1017/1019/1107/51363/548596/1159/1436/1503/4921/7…
GO:0017111	MF	GO:0017111	nucleoside-triphosphatase activity	365	0.385212	1.66417	9.999e-05	0.00242704	0.00187151	2974	tags=50%, list=34%, signal=34%	9619/91351/19/55601/79659/85441/84515/4600/55930/23682/388/58480/7280/5244/84239/493/83990/8318/57530/115361/2669/9837/51659/23046/3801/4173/4174/4436/89797/5888/8438/5983/121268/6236/347733/51175/10350/9429/10123/29028/478/10396/641/1107/79132/1763/26052/2634/84296/3070/347240/4172/4175/4176/166785/4599/57644/4521/10721/5872/338382/56852/5889/9401/5982/5984/5985/9628/389/22800/5414/7153/203068/7…
GO:0018108	BP	GO:0018108	peptidyl-tyrosine phosphorylation	189	0.392377	1.66228	9.999e-05	0.00242704	0.00187151	2910	tags=50%, list=34%, signal=34%	83666/1950/3690/4914/9467/958/5168/2534/3678/4254/8829/54625/1636/84632/558/1436/4921/1742/1942/2043/2065/2261/2621/1839/3280/3082/3976/9833/4233/54892/5154/5155/5175/91461/5649/9021/80725/55620/7273/7422/7448/90/148/389658/23568/409/627/857/868/6352/960/972/57396/1272/1437/780/2202/1969/2264/2322/2690/3383/3589/3592/3593/51561/133396/3565/3567/3574/3645/3718/5606/4486/4739/9148/3084/56034/80310/…
GO:0018212	BP	GO:0018212	peptidyl-tyrosine modification	191	0.38809	1.64476	9.999e-05	0.00242704	0.00187151	2910	tags=50%, list=34%, signal=34%	83666/1950/3690/4914/9467/958/5168/2534/3678/4254/8829/54625/1636/84632/558/1436/4921/1742/1942/2043/2065/2261/2621/1839/3280/3082/3976/9833/4233/54892/5154/5155/5175/91461/5649/9021/80725/55620/7273/7422/7448/90/148/389658/23568/409/627/857/868/6352/960/972/57396/1272/1437/780/2202/1969/2264/2322/2690/3383/3589/3592/3593/51561/133396/3565/3567/3574/3645/3718/5606/4486/4739/9148/3084/56034/80310/…
GO:0019058	BP	GO:0019058	viral life cycle	137	0.388169	1.62163	9.999e-05	0.00242704	0.00187151	1945	tags=38%, list=23%, signal=30%	6347/8519/4940/3690/1803/2934/3434/3678/4360/5091/91543/290/164668/558/3576/2621/3429/24138/10410/3669/3956/4599/55706/5819/2494/79023/4938/10572/6510/6590/7153/140564/60489/857/6352/30835/972/942/983/10332/23601/1380/1949/1969/8468/8091/3383/3693/3695/27074/3949/3965
GO:0019216	BP	GO:0019216	regulation of lipid metabolic process	169	0.391544	1.65181	9.999e-05	0.00242704	0.00187151	3075	tags=54%, list=36%, signal=36%	9619/19/85441/23682/5244/133/8644/650/672/5933/80183/718/1019/634/2261/50486/51280/2822/3398/3490/3638/10062/5154/5155/5166/113791/23179/6097/6319/9021/6653/158219/225/57406/31/51129/301/824/857/3491/972/1268/1543/84649/1717/57540/1917/151176/10613/2171/2222/2224/2246/2264/2274/2322/2358/2852/3157/3553/9314/3949/85329/51599/4199/51085/8013/5159/8398/5629/5901/6095/85414/6591/8651/10580/8877/6713/…
GO:0019220	BP	GO:0019220	regulation of phosphate metabolic process	769	0.32921	1.4414	9.999e-05	0.00242704	0.00187151	2411	tags=38%, list=28%, signal=30%	6347/2013/6348/83666/9590/414062/1524/1950/2213/3690/4914/26471/9088/23682/9467/493/650/1490/9134/958/993/990/1116/63967/3627/54541/5168/2534/9290/83729/3678/3655/4254/8829/54625/5933/6472/7099/1636/94/84632/199/84962/246/641/718/728/1019/8851/634/1163/1436/4921/1742/1844/1848/1894/1942/114794/2043/2065/2149/2203/338557/221472/2258/2261/2335/4616/2621/9535/2822/10457/1839/57493/51191/3280/3082/28…
GO:0019221	BP	GO:0019221	cytokine-mediated signaling pathway	380	0.397568	1.71902	9.999e-05	0.00242704	0.00187151	1871	tags=37%, list=22%, signal=30%	2162/6347/3437/6348/8519/4940/83666/604/414062/1524/132014/4600/58480/837/958/1052/4261/3627/2920/6624/2534/3115/3119/3122/3127/2537/3434/3597/3559/3665/4582/4939/54625/91543/6775/246/558/634/153222/1436/1439/6387/3576/2057/2335/2353/2621/2634/64388/3082/3117/3162/3429/3433/10410/3601/3560/3563/3566/3669/3976/4055/4318/4502/4599/9111/10062/4938/5155/10213/6097/9021/6773/9966/7185/54765/11274/7422…
GO:0019725	BP	GO:0019725	cellular homeostasis	394	0.333023	1.44105	9.999e-05	0.00242704	0.00187151	2886	tags=44%, list=33%, signal=30%	6347/6348/793/1524/23682/6280/133/358/84239/493/958/3627/1649/2534/2841/9290/23649/5579/5983/6279/11346/9429/478/8938/728/760/773/784/825/6387/10800/1742/1763/2149/2237/2621/2822/9843/3162/3956/4035/4502/4830/5026/5031/5106/5111/5422/10714/5557/5558/5982/5984/5985/6344/6556/1318/113235/83697/6546/285195/8614/7052/55151/26154/148/9472/187/408/468/491/245973/534/114897/794/857/6352/729230/952/10518…
GO:0019752	BP	GO:0019752	carboxylic acid metabolic process	447	0.347445	1.5072	9.999e-05	0.00242704	0.00187151	2415	tags=39%, list=28%, signal=30%	1545/259307/1645/1646/501/92126/1950/26471/26227/51268/8605/29968/23428/10157/8644/493/672/23670/54541/8528/1719/84706/11343/8974/5091/5742/6472/6999/7298/10090/39/11332/6296/1109/246/440/445/586/718/833/634/548596/1159/55790/1491/1503/4051/2203/2348/2617/2653/2678/2875/401494/3082/84842/3638/4200/166785/10797/55706/1728/10062/2494/79023/114880/5106/5155/5166/5226/5625/10213/6319/23539/113235/236…
GO:0022402	BP	GO:0022402	cell cycle process	594	0.389961	1.7006	9.999e-05	0.00242704	0.00187151	2917	tags=49%, list=34%, signal=35%	6347/604/1950/157570/84515/9768/26227/9088/388/58480/493/672/83990/1490/9134/993/8318/990/63967/1649/1719/2177/2669/9837/55388/4173/4174/4436/4582/23397/4998/23594/7703/22822/23649/5579/5888/8438/5933/5983/6241/7015/51175/7298/677/81569/199/84962/79000/586/641/675/699/825/168448/113130/1017/1019/8851/81620/55166/387103/100653515/1107/3576/64858/220042/1763/51514/1869/1894/1978/146956/2237/2621/10…
GO:0022407	BP	GO:0022407	regulation of cell-cell adhesion	226	0.369263	1.57525	9.999e-05	0.00242704	0.00187151	2957	tags=48%, list=34%, signal=33%	6347/604/1952/2213/11148/64332/650/29126/1803/2113/2534/3109/3115/3559/3655/5270/100/199/246/445/923/999/634/4680/1051/10370/6387/1960/10875/10457/3280/3566/3902/3956/266727/4602/5063/8654/5896/6441/55714/7422/11326/288/301/384/655/114897/857/6352/729230/30835/960/970/972/942/928/1041/11221/1949/10272/2737/3077/3113/3142/3146/3329/3383/3485/3592/3593/3553/51561/3565/3574/3575/182/3718/9314/3965/7…
GO:0022414	BP	GO:0022414	reproductive process	577	0.310678	1.35438	9.999e-05	0.00242704	0.00187151	2459	tags=36%, list=29%, signal=28%	2013/84168/6414/604/1588/2034/84515/4914/26471/9088/8605/10863/133/8644/55723/493/83990/9134/993/8528/55840/2113/2177/3678/4254/23764/4436/23397/639/5888/8438/5270/285590/144195/677/1636/100/10566/558/675/699/1017/1051/79846/10370/1307/1299/153222/1393/1869/146956/2057/2119/9156/2353/2678/3280/3488/3490/3566/3624/3696/8997/3976/4036/84930/4318/84057/55706/5819/4861/4521/51294/5111/8654/5155/10733…
GO:0022603	BP	GO:0022603	regulation of anatomical structure morphogenesis	507	0.346649	1.50771	9.999e-05	0.00242704	0.00187151	2791	tags=43%, list=32%, signal=31%	6347/57175/2013/6348/1545/6678/604/1952/1524/388/58480/133/358/650/672/958/10602/23670/1116/3627/5168/2113/2534/3678/8829/57580/5579/57698/7015/347733/10090/94/100/306/348110/718/728/8851/634/10370/1436/6387/3576/1742/54567/26052/1870/1942/2043/2119/221472/2258/2335/10457/3280/3082/28996/3162/126393/3566/3679/3696/8997/3976/4035/11178/4133/4897/128506/115209/4974/5063/5154/23187/90102/10769/10213…
GO:0022604	BP	GO:0022604	regulation of cell morphogenesis	227	0.362658	1.54726	9.999e-05	0.00242704	0.00187151	2789	tags=44%, list=32%, signal=31%	6347/57175/6348/6678/388/58480/10602/5168/2534/8829/57580/57698/347733/10090/348110/8851/1436/6387/1742/26052/1942/2043/221472/2258/2335/3679/8997/4035/11178/4133/4897/4974/5063/5649/389/6383/10500/8482/6474/6696/80725/7422/7533/577/301/25805/53335/283149/627/80823/659/84446/960/11135/148170/1141/1690/23603/2017/23191/27185/1949/23136/221061/54751/2192/10979/121512/3383/4241/4739/54413/5058/55742…
GO:0022610	BP	GO:0022610	biological adhesion	763	0.347068	1.5194	9.999e-05	0.00242704	0.00187151	2411	tags=39%, list=28%, signal=31%	3959/6347/2013/7162/84168/1545/8496/347902/604/1952/1524/2213/11148/10855/3690/3914/4606/64332/388/6280/57823/9806/650/1490/29126/1291/1803/2113/342184/2534/2934/3109/3115/3559/3678/3655/8516/3801/4254/4582/8829/57580/6279/6402/5270/23145/677/94/100/30817/199/84962/246/306/445/558/9564/923/999/8851/634/4680/1051/10370/9069/23562/1307/1277/10391/1496/1500/6387/3576/4921/1742/1942/51162/1960/2043/2…
GO:0023014	BP	GO:0023014	signal transduction by protein phosphorylation	415	0.336604	1.45823	9.999e-05	0.00242704	0.00187151	2819	tags=43%, list=33%, signal=31%	6347/6348/9590/414062/1950/2213/4914/650/1490/958/1116/2534/9290/3559/83729/4254/8829/25780/7099/677/84962/246/728/634/1436/1439/1742/1844/1848/1942/2043/2065/2149/338557/221472/2258/2261/2335/4616/2621/10457/1839/3082/28996/3486/3487/3560/3563/3624/128239/3976/4035/4055/5600/4233/4853/5031/5063/8654/5154/5155/10213/8482/153769/6653/10253/55333/7057/7078/7422/148/389658/51074/367/7984/408/409/655…
GO:0030029	BP	GO:0030029	actin filament-based process	347	0.336599	1.4519	9.999e-05	0.00242704	0.00187151	2708	tags=41%, list=31%, signal=29%	57175/2013/5142/84168/604/4606/4983/388/58480/358/1490/10602/342184/6624/2934/8829/57580/55800/6330/285590/57698/8470/11346/165904/199/246/154810/348110/9564/825/8851/10391/23406/1436/1496/6387/1894/2036/2037/221472/54874/9535/3757/4035/4233/58529/10529/4853/84033/5063/5154/90102/130271/5872/389/201191/171024/29767/7273/8936/87/83543/51421/301/395/9828/7984/408/55616/26053/10677/274/822/857/55704…
GO:0030036	BP	GO:0030036	actin cytoskeleton organization	302	0.350086	1.50541	9.999e-05	0.00242704	0.00187151	2804	tags=43%, list=32%, signal=30%	57175/2013/84168/604/4606/4983/388/58480/358/1490/10602/342184/6624/2934/8829/57580/285590/57698/8470/11346/165904/199/246/154810/348110/9564/825/8851/10391/23406/1436/1496/6387/1894/2036/2037/221472/9535/4035/4233/58529/10529/4853/84033/5063/5154/90102/130271/5872/389/201191/171024/29767/7273/8936/87/83543/51421/301/395/9828/7984/408/55616/26053/10677/274/822/55704/55561/11135/148170/8837/23332/…
GO:0030054	CC	GO:0030054	cell junction	631	0.334351	1.45963	9.999e-05	0.00242704	0.00187151	2806	tags=42%, list=33%, signal=31%	57175/23150/8496/23336/9590/57514/157570/3690/4983/388/58480/6280/440279/5244/726/57530/1803/342184/6624/2564/2934/3678/3655/8516/3801/8829/57716/23362/6330/285590/8470/11346/85461/165904/100/84962/154810/360/58504/83478/9564/8927/720/721/999/1019/634/9069/23562/10391/64506/1496/1500/4921/1742/58512/8448/1894/2037/2043/2258/2261/2565/2570/2700/2894/57493/128239/3696/6453/54800/4035/11178/143098/5…
GO:0030097	BP	GO:0030097	hemopoiesis	428	0.339471	1.47201	9.999e-05	0.00242704	0.00187151	2917	tags=44%, list=34%, signal=31%	6348/604/29760/2034/157570/2213/64332/4914/1052/2113/2177/2841/9290/8365/55008/3559/3665/4254/4436/639/57580/5579/91543/7099/10100/677/1636/100/558/116071/55509/675/760/634/1051/1436/54567/139818/1960/10875/2353/10468/2621/3280/28996/3398/3566/3624/84623/3902/3956/3976/4055/4151/9833/407975/4318/4602/54892/4830/4853/128506/8544/10213/338382/5896/6097/9644/29887/85439/7049/7057/7153/10537/7422/748…
GO:0030099	BP	GO:0030099	myeloid cell differentiation	196	0.405552	1.7202	9.999e-05	0.00242704	0.00187151	1871	tags=40%, list=22%, signal=32%	6348/604/2034/2113/9290/8365/3665/4254/5579/7099/10100/677/116071/55509/760/634/1051/1436/2353/28996/3398/3624/3976/4055/4151/4318/54892/4830/4853/128506/8544/338382/9644/29887/7049/7057/10537/7422/87/91/92/632/135228/972/1021/1028/1050/1053/1054/51208/23601/1435/1437/25979/1969/2124/2200/27086/10272/29909/8357/126961/333932/8353/121504/8370/8366/3205/3589/3593/51561/133396/3565/3567/3623/3662/18…
GO:0030141	CC	GO:0030141	secretory granule	380	0.359776	1.55561	9.999e-05	0.00242704	0.00187151	2748	tags=44%, list=32%, signal=31%	2162/3959/2212/5627/6414/6678/272/968/1950/10855/3690/6280/340061/929/1116/2934/6279/6402/5270/2/51816/10566/290/306/10396/25825/90427/675/718/728/634/4680/5199/1277/23406/1393/1522/283849/10875/2335/2617/2621/9535/3043/3082/4035/25840/4318/4521/4973/5154/5155/5175/51365/10213/25797/5872/8635/710/27180/6556/6518/6590/29887/374403/7057/7078/203068/7422/26154/21/87/221/230/240/64333/857/10576/13522…
GO:0030155	BP	GO:0030155	regulation of cell adhesion	365	0.344952	1.49024	9.999e-05	0.00242704	0.00187151	2957	tags=45%, list=34%, signal=31%	6347/2013/1545/604/1952/2213/11148/64332/9806/650/29126/1803/2113/342184/2534/2934/3109/3115/3559/3678/3655/4582/8829/57580/5270/94/100/199/246/445/923/999/634/4680/1051/10370/1307/1277/10391/6387/3576/4921/1942/1960/2065/10875/2335/10457/3280/3566/3902/3956/4035/266727/4602/5063/8654/90102/5896/6441/55714/7045/7052/7057/7422/11326/7448/27299/288/301/384/395/655/114897/857/6352/3491/729230/30835/…
GO:0030162	BP	GO:0030162	regulation of proteolysis	326	0.338637	1.4591	9.999e-05	0.00242704	0.00187151	2380	tags=37%, list=28%, signal=28%	871/3075/84168/5627/1950/26471/4983/6280/9806/358/27113/837/1490/79094/2534/2934/2537/4210/6279/5272/5270/23145/2/27018/716/717/718/720/721/728/825/5199/1522/1942/2043/2161/2149/2335/2621/10755/2822/3082/28996/4318/22861/29763/10769/10213/5896/255488/710/153769/6590/6653/7057/7078/8743/9966/51377/7422/11326/7448/7480/3730/408/409/9532/10018/274/332/727/838/857/3491/135228/960/1032/1050/8837/54982…
GO:0030198	BP	GO:0030198	extracellular matrix organization	208	0.436443	1.85631	9.999e-05	0.00242704	0.00187151	2247	tags=46%, list=26%, signal=35%	871/84168/1545/6678/3690/3914/9806/1490/1291/1803/2113/6624/3678/3655/8516/285590/2/999/1307/1277/85301/1299/55790/4921/2335/2621/7087/3679/3696/4035/4320/4318/169611/5154/5155/5175/23187/90102/9644/6696/7045/7057/55151/7448/8038/9719/54507/165/63827/602/824/3491/960/8837/23332/1303/7373/340267/1289/83716/1513/1520/780/2022/30001/56605/2192/10516/2200/2201/2264/2331/60495/5654/3383/3384/3672/3683…
GO:0030234	MF	GO:0030234	enzyme regulator activity	401	0.33689	1.45818	9.999e-05	0.00242704	0.00187151	3233	tags=49%, list=37%, signal=32%	871/6348/151636/83666/5627/54453/57514/1950/26471/4983/9467/9806/259173/493/650/9134/3627/23397/8829/57580/25780/5272/5270/285590/23145/117289/23158/2/9744/84632/306/79658/58504/83478/27018/718/720/721/825/1019/8851/1163/1894/114794/2065/2258/2335/2621/9535/3486/389119/3843/6453/58529/22861/5111/5155/23645/10213/10231/9628/710/9644/153769/6590/9021/10253/90627/374403/9882/7078/51377/55803/577/840…
GO:0030334	BP	GO:0030334	regulation of cell migration	438	0.390123	1.69208	9.999e-05	0.00242704	0.00187151	2748	tags=47%, list=32%, signal=34%	6347/57175/2013/6348/1545/8519/6678/9590/1524/1588/1950/3690/388/56271/650/29126/958/3627/23604/5168/2113/2841/3678/3655/4254/8829/57580/5270/57698/7015/1636/94/100/199/84962/154810/306/348110/10396/9564/728/999/634/4680/10370/1277/1436/1496/6387/3576/4921/54567/1942/2149/2335/2621/2822/10457/1839/3082/3162/3486/3488/285313/59352/4035/4233/4318/5031/5063/5154/5155/5175/90102/10769/5649/389/54538/…
GO:0030335	BP	GO:0030335	positive regulation of cell migration	274	0.392046	1.68233	9.999e-05	0.00242704	0.00187151	2742	tags=48%, list=32%, signal=34%	6348/6678/9590/1950/3690/388/650/29126/958/3627/23604/5168/2113/3678/3655/4254/8829/57580/57698/7015/199/154810/306/10396/9564/728/4680/1277/1436/6387/3576/4921/2149/2335/2621/2822/10457/1839/3082/3162/3488/59352/4035/4233/4318/5031/5063/5154/5155/5175/10769/5649/389/22800/10500/8482/153769/6546/10253/7057/7422/7448/81029/90/91/9510/301/84913/655/659/857/6352/3491/729230/972/23332/8895/1435/1512/…
GO:0030554	MF	GO:0030554	adenyl nucleotide binding	617	0.348865	1.52214	9.999e-05	0.00242704	0.00187151	3119	tags=49%, list=36%, signal=34%	5142/9619/91351/4940/19/80216/55601/79659/85441/84515/55930/4914/9088/388228/340061/5244/84239/493/83990/990/4261/23604/2534/23046/3801/4173/4174/4436/89797/4939/4998/5091/5579/5888/8438/83694/10350/9429/11332/6296/94/440/445/29028/23120/57205/478/10396/57198/558/641/699/833/5129/1017/1019/1107/51363/548596/1159/1436/1503/4921/79132/1763/1841/2043/2065/2203/2261/2617/3070/28996/81618/8997/347240/…
GO:0031012	CC	GO:0031012	extracellular matrix	286	0.37105	1.59345	9.999e-05	0.00242704	0.00187151	2247	tags=39%, list=26%, signal=30%	2162/3959/871/6678/10855/3914/6280/9806/1490/1116/1291/83729/3655/89797/349667/6279/5272/5270/2/5199/1307/1277/85301/1299/1522/6387/51162/114794/2161/10875/2335/2822/3490/3956/339398/4320/4318/169611/5046/5155/5649/6383/8482/710/6590/8406/7041/7045/7049/7052/7057/7078/7422/7448/81029/27299/9510/81794/11093/9719/54507/165/3730/301/307/63827/655/284018/3491/4064/1101/1690/1303/7373/81578/340267/128…
GO:0031252	CC	GO:0031252	cell leading edge	203	0.372883	1.58392	9.999e-05	0.00242704	0.00187151	2437	tags=42%, list=28%, signal=31%	57175/23150/84168/57514/3690/1803/6624/2564/2934/3678/8516/4254/4210/23362/57698/8470/30817/199/84962/154810/348110/9564/999/1496/1500/23109/221472/2565/24138/6453/4830/90102/130271/5872/10235/10253/80725/8936/51225/59/87/84059/83543/286/10297/26084/55616/468/822/55704/57126/960/55561/1021/26047/23603/2017/23191/23586/1809/50506/23136/1969/10979/121512/2852/3691/57608/133746/3745/11133/9788/64005…
GO:0031347	BP	GO:0031347	regulation of defense response	368	0.354812	1.53305	9.999e-05	0.00242704	0.00187151	2911	tags=44%, list=34%, signal=31%	3075/6348/151636/83666/5627/80216/604/414062/1588/55601/2213/64332/26471/6280/340061/929/2113/2177/2534/3434/3559/3665/4210/11343/4582/54625/91543/6279/5272/7099/79865/2/100/716/717/718/720/721/728/10203/923/634/1051/5199/79132/5169/2161/338557/10875/2678/51191/3082/3902/4318/5819/22861/9111/10062/5063/10622/10213/338382/5896/8482/710/6441/9021/7052/7100/54765/11274/11326/7448/225/301/60489/384/4…
GO:0031399	BP	GO:0031399	regulation of protein modification process	766	0.334265	1.46339	9.999e-05	0.00242704	0.00187151	2819	tags=42%, list=33%, signal=31%	6347/2013/6348/151636/83666/9590/604/414062/1524/1950/2213/3690/4914/26471/9088/9467/91947/493/56271/650/672/1490/9134/958/993/990/1116/63967/3627/54541/5168/2534/9290/83729/3678/4254/4582/8829/54625/7099/1636/94/84632/199/84962/246/641/718/728/825/1019/8851/634/1163/1436/4921/1742/1844/1848/1894/1942/114794/2043/2065/2149/55215/338557/221472/2258/2261/2335/4616/2621/9535/10457/1839/57493/51191/3…
GO:0031401	BP	GO:0031401	positive regulation of protein modification process	546	0.336509	1.46507	9.999e-05	0.00242704	0.00187151	2439	tags=38%, list=28%, signal=29%	6347/2013/6348/83666/9590/604/414062/1524/1950/2213/3690/4914/26471/91947/493/650/672/1490/958/990/1116/63967/5168/2534/9290/83729/3678/4254/4582/8829/54625/7099/1636/94/84632/199/84962/246/718/728/8851/1163/1436/4921/1742/1848/1894/1942/2043/2065/2149/55215/338557/221472/2258/2261/4616/2621/10457/1839/3280/3082/28996/3486/3487/3624/128239/3976/4035/4055/5600/22924/84930/4318/4602/54892/9111/4853…
GO:0032101	BP	GO:0032101	regulation of response to external stimulus	392	0.378985	1.63951	9.999e-05	0.00242704	0.00187151	2817	tags=46%, list=33%, signal=32%	6347/3075/57175/6348/151636/83666/5627/604/414062/1588/55601/2213/10855/64332/26471/6280/340061/3627/23604/2113/2177/2841/3434/3559/4210/11343/8829/6279/5270/7099/347733/2/100/199/23621/716/717/718/720/721/728/784/10203/825/923/634/1051/5199/1496/6387/3576/79132/5169/2043/2161/2149/338557/10875/2621/2678/51191/3082/4035/4233/4318/58529/22861/10062/5154/5155/90102/5792/10500/8482/710/9021/6696/705…
GO:0032102	BP	GO:0032102	negative regulation of response to external stimulus	167	0.420742	1.77386	9.999e-05	0.00242704	0.00187151	3056	tags=57%, list=35%, signal=37%	6347/57175/5627/1588/2213/2113/2841/3559/4210/8829/5270/100/199/23621/784/10203/634/1496/79132/5169/2043/2161/338557/10875/3082/58529/10062/5154/5155/90102/10500/8482/710/9021/6696/7057/7448/225/384/114897/727/135228/928/1026/23332/1843/11221/83481/2358/2852/2896/5654/3593/3565/9314/83999/3949/23005/114548/171389/4907/11240/55872/5329/5734/5740/5788/6095/65078/7869/10512/223117/6405/56920/64218/5…
GO:0032269	BP	GO:0032269	negative regulation of cellular protein metabolic process	397	0.327961	1.41921	9.999e-05	0.00242704	0.00187151	2917	tags=43%, list=34%, signal=30%	871/151636/5627/4983/9467/9806/358/493/56271/672/79094/54541/1719/2534/2537/54625/5272/5270/23145/7099/7298/677/2/27018/718/720/721/825/634/64506/1522/1844/1848/1942/1978/114794/2043/4616/2621/10755/9535/57493/3082/28996/3486/3488/389119/3843/3976/4085/84930/4318/58529/23645/5896/710/153769/6590/9021/6653/10253/80725/55333/7057/7078/54765/51377/7422/11326/7448/84327/3730/408/409/468/9532/274/332/…
GO:0032270	BP	GO:0032270	positive regulation of cellular protein metabolic process	680	0.338086	1.47754	9.999e-05	0.00242704	0.00187151	2439	tags=38%, list=28%, signal=30%	6347/2013/84168/6348/83666/9590/604/414062/1524/1950/2213/3690/4914/26471/6280/91947/493/27113/650/672/837/1490/958/990/1116/63967/5168/2534/9290/2934/83729/3678/4254/3872/4210/4582/8829/54625/6279/7099/1636/94/84632/199/84962/246/27018/718/728/825/1019/8851/1163/1436/4921/1742/1848/1894/1942/2043/2065/2161/2149/55215/338557/221472/2258/2261/2335/4616/2621/2822/10457/1839/3280/3082/28996/3486/348…
GO:0032553	MF	GO:0032553	ribonucleotide binding	759	0.347102	1.51956	9.999e-05	0.00242704	0.00187151	3119	tags=48%, list=36%, signal=34%	5142/9619/91351/4940/19/80216/55601/79659/85441/84515/4600/55930/4914/9088/23682/388/58480/388228/340061/7280/5244/84239/493/83990/990/4261/23604/2534/115361/2669/23046/3801/4173/4174/4436/89797/4939/4998/5091/5579/5888/8438/121268/83694/6236/347733/51175/10350/9429/11332/6296/94/10123/440/445/29028/23120/57205/478/10396/57198/558/641/699/833/5129/1017/1019/1107/51363/548596/1159/1436/1503/4921/7…
GO:0032555	MF	GO:0032555	purine ribonucleotide binding	759	0.347102	1.51956	9.999e-05	0.00242704	0.00187151	3119	tags=48%, list=36%, signal=34%	5142/9619/91351/4940/19/80216/55601/79659/85441/84515/4600/55930/4914/9088/23682/388/58480/388228/340061/7280/5244/84239/493/83990/990/4261/23604/2534/115361/2669/23046/3801/4173/4174/4436/89797/4939/4998/5091/5579/5888/8438/121268/83694/6236/347733/51175/10350/9429/11332/6296/94/10123/440/445/29028/23120/57205/478/10396/57198/558/641/699/833/5129/1017/1019/1107/51363/548596/1159/1436/1503/4921/7…
GO:0032559	MF	GO:0032559	adenyl ribonucleotide binding	613	0.348985	1.52257	9.999e-05	0.00242704	0.00187151	3119	tags=49%, list=36%, signal=34%	5142/9619/91351/4940/19/80216/55601/79659/85441/84515/55930/4914/9088/388228/340061/5244/84239/493/83990/990/4261/23604/2534/23046/3801/4173/4174/4436/89797/4939/4998/5091/5579/5888/8438/83694/10350/9429/11332/6296/94/440/445/29028/23120/57205/478/10396/57198/558/641/699/833/5129/1017/1019/1107/51363/548596/1159/1436/1503/4921/79132/1763/1841/2043/2065/2203/2261/2617/3070/28996/81618/8997/347240/…
GO:0032940	BP	GO:0032940	secretion by cell	669	0.342918	1.49821	9.999e-05	0.00242704	0.00187151	2908	tags=44%, list=34%, signal=31%	2162/3959/3790/9619/6348/2212/5627/6414/6678/19/9590/272/968/1588/1950/2213/10855/3690/284021/6280/340061/440279/133/284119/1490/929/29126/958/1116/1803/2934/5579/91543/6279/6402/5270/7099/2/51816/30817/199/290/306/10396/558/23621/8938/718/728/773/634/4680/5199/23406/1393/1436/1522/6387/8448/283849/2149/338557/10875/2335/2621/10755/9535/2822/3043/3082/3162/3566/3624/6453/8997/3976/4035/5600/25840…
GO:0032943	BP	GO:0032943	mononuclear cell proliferation	134	0.3881	1.61943	9.999e-05	0.00242704	0.00187151	2910	tags=51%, list=34%, signal=34%	604/2213/11148/29126/958/2534/3109/3115/3559/7099/1636/100/199/923/1051/1503/10457/3070/3280/8654/6441/6556/11326/301/384/79915/11119/6352/729230/4064/30835/952/970/972/942/1026/1141/1380/1435/2322/3113/3146/3329/3485/3592/3593/3553/51561/3565/3567/3574/3575/3718/3965/5074/23228/5621/5788/6304/6385/7037/27242/7293/944/8744/7412/64115/7535
GO:0033674	BP	GO:0033674	positive regulation of kinase activity	264	0.354365	1.51844	9.999e-05	0.00242704	0.00187151	2410	tags=41%, list=28%, signal=30%	2013/1950/3690/4914/493/650/958/990/1116/63967/2534/4254/7099/1636/84632/84962/728/8851/1163/1436/4921/1742/1848/1894/1942/2043/2065/2149/221472/2258/2261/4616/2621/3082/128239/6453/5600/22924/54892/5063/8654/5154/5155/5649/6556/10253/80725/7057/9966/7422/7436/93/148/389658/7984/408/627/79866/727/8536/29775/55704/6352/3491/972/983/1026/1164/1435/10926/22943/1815/1849/1917/10595/2146/2246/8817/232…
GO:0033993	BP	GO:0033993	response to lipid	398	0.360742	1.56122	9.999e-05	0.00242704	0.00187151	2491	tags=41%, list=29%, signal=31%	6347/5142/9619/6348/6678/19/9590/1646/968/1524/5244/133/8644/358/672/1490/929/29126/3627/2920/54541/2113/114907/4360/6279/7099/7298/677/199/306/360/445/478/558/728/760/768/923/1019/1051/1277/153222/1393/1439/3576/1869/1978/2149/2353/2678/2822/3015/3490/3624/3638/4602/4830/1728/10062/2494/5031/5106/5111/5166/6097/6319/6556/6590/6696/8614/7041/7049/7057/7480/81029/7533/21/31/11093/301/367/409/10018…
GO:0034097	BP	GO:0034097	response to cytokine	581	0.370519	1.61529	9.999e-05	0.00242704	0.00187151	1945	tags=35%, list=23%, signal=29%	2162/6347/3437/6348/8519/4940/83666/6678/9590/604/414062/1524/132014/4600/58480/9806/672/837/929/29126/958/1052/1116/4261/3627/2920/2113/6624/2534/115361/2934/3115/3119/3122/3127/2537/3434/3597/3559/3665/4210/4360/4582/4939/54625/11156/91543/6472/6775/7099/7298/677/199/246/445/558/27101/1019/634/1051/1277/153222/1393/1436/1439/1491/6387/3576/2057/2335/2353/2621/2634/2678/10755/64388/3082/3117/316…
GO:0034774	CC	GO:0034774	secretory granule lumen	148	0.396024	1.66116	9.999e-05	0.00242704	0.00187151	2459	tags=43%, list=29%, signal=31%	2162/3959/5627/6414/6678/272/1950/10855/6280/1116/2934/6279/2/51816/718/5199/23406/1522/2335/2621/9535/3082/5154/5155/10213/25797/8635/710/6590/7057/7078/203068/7422/87/230/240/64333/10576/83716/1512/1521/23191/79980/8288/2171/2717/2896/3146/3240/388697/3310/3671/3700/116844/5036/11240/5122/51316/10394/5702/5806/5768/56729
GO:0035239	BP	GO:0035239	tube morphogenesis	426	0.348171	1.5093	9.999e-05	0.00242704	0.00187151	2800	tags=43%, list=32%, signal=31%	6347/2013/1545/6678/1524/1950/2034/10855/3690/388/133/358/650/672/1490/958/23670/1116/3627/5168/2113/342184/3678/8829/639/5579/7015/677/94/154810/290/306/58504/83478/718/728/10203/634/1436/1522/3576/54567/1870/1942/51162/1960/2043/2119/79633/2335/2348/2822/10457/57493/3280/8820/3082/28996/3162/126393/3398/3696/4035/4036/4233/4897/5154/5175/10769/54538/6474/10253/90627/55333/7045/7049/7052/7057/22…
GO:0035295	BP	GO:0035295	tube development	506	0.361289	1.57133	9.999e-05	0.00242704	0.00187151	2800	tags=44%, list=32%, signal=32%	6347/2013/1545/6678/793/1524/1950/2034/10855/3690/26227/388/133/358/650/672/83990/1490/958/23670/1116/3627/5168/2113/342184/3678/3655/8829/639/5579/5270/7015/7298/677/94/100/154810/290/306/58504/83478/445/718/728/10203/634/10370/1436/1522/3576/54567/1870/1942/51162/1960/1978/2043/2119/79633/2335/2348/2822/10457/57493/3280/8820/3082/28996/3162/126393/3398/3488/3696/3976/4035/4036/4233/407975/4897/…
GO:0035639	MF	GO:0035639	purine ribonucleoside triphosphate binding	729	0.347063	1.51859	9.999e-05	0.00242704	0.00187151	3108	tags=48%, list=36%, signal=34%	9619/91351/4940/19/80216/55601/79659/85441/84515/4600/55930/4914/9088/23682/388/58480/388228/7280/5244/84239/493/83990/990/4261/23604/2534/115361/2669/23046/3801/4173/4174/4436/89797/4939/4998/5091/5579/5888/8438/121268/83694/6236/347733/51175/10350/9429/6296/94/10123/440/445/29028/23120/57205/478/10396/57198/558/641/699/833/5129/1017/1019/1107/548596/1159/1436/1503/4921/79132/1763/26052/1841/204…
GO:0035690	BP	GO:0035690	cellular response to drug	159	0.414914	1.74632	9.999e-05	0.00242704	0.00187151	2828	tags=51%, list=33%, signal=35%	5142/1545/4914/388/358/493/672/54541/2113/114907/2534/7703/5888/199/445/558/641/999/1017/1019/8851/1393/1894/1978/2203/2348/2621/2822/3082/3162/3757/4233/4502/4602/4830/1728/5106/5111/5155/10280/6546/55151/301/468/53335/652968/983/8837/1141/10518/1536/28960/2146/2769/8091/3383/8807/3553/9992/23135/9314/687/10276/8013/5024/5074/5141/80310/65018/59338/5621/5724/6261/140885/56833/8877/7037/8914/7098…
GO:0036230	BP	GO:0036230	granulocyte activation	234	0.377301	1.61089	9.999e-05	0.00242704	0.00187151	2609	tags=45%, list=30%, signal=32%	6348/2212/272/968/2213/10855/6280/340061/929/1116/2934/57580/6279/6402/51816/290/306/10396/718/728/634/4680/5199/23406/1522/3576/5169/10875/9535/3043/25840/4318/4973/5175/10213/25797/8635/27180/6556/6518/6590/374403/203068/221/230/240/64333/6352/729230/10576/57126/960/23601/8895/83716/1512/1520/1536/23191/79930/79980/8288/2171/2204/2357/2358/84443/2717/2896/3146/3240/388697/3310/84329/8807/3683/8…
GO:0038023	MF	GO:0038023	signaling receptor activity	547	0.33471	1.45727	9.999e-05	0.00242704	0.00187151	3065	tags=47%, list=36%, signal=32%	84168/5157/19/1952/1524/1950/2213/132014/3690/4914/929/958/2564/27239/2841/2857/9290/8111/3119/3122/3597/3559/3872/4360/4886/8829/93035/349667/7099/54210/79865/94/30817/290/558/728/10203/919/1436/1439/10800/4921/2043/2057/2065/2149/9103/338557/2261/2348/2565/2570/387509/2894/3117/3601/3560/3563/3566/3696/3902/59352/57121/4035/4233/5819/4853/4883/10062/2494/5026/5031/10544/11251/5792/54538/6097/63…
GO:0040007	BP	GO:0040007	growth	414	0.331293	1.43515	9.999e-05	0.00242704	0.00187151	2920	tags=44%, list=34%, signal=30%	6414/604/1588/6280/133/1291/55840/342184/9837/2934/3872/4886/8829/6279/5270/285590/57698/8470/7298/677/94/9564/675/825/1019/8851/634/85301/6387/4921/1848/2203/2258/2261/2335/2621/84296/1839/57493/3486/3487/3488/3490/3624/59352/4035/4133/5600/407975/4502/58529/54892/4853/4897/91461/25886/10848/10235/140606/10500/8482/6446/10110/9021/6696/10253/54879/8614/7049/55151/7422/8936/7480/7516/8089/91/93/1…
GO:0040012	BP	GO:0040012	regulation of locomotion	488	0.375248	1.63049	9.999e-05	0.00242704	0.00187151	2822	tags=46%, list=33%, signal=33%	6347/57175/2013/6348/1545/8519/6678/9590/1524/1588/1950/3690/378938/388/9806/56271/650/284119/29126/958/3627/23604/5168/2113/2841/3678/3655/4254/8829/5091/57580/5270/57698/7015/347733/1636/94/100/199/84962/154810/306/348110/10396/9564/728/999/634/4680/79846/10370/1277/1436/1496/6387/3576/4921/54567/1942/2065/2149/2335/2621/2822/10457/1839/3082/3162/3486/3488/285313/59352/4035/4233/4318/5031/5063/…
GO:0040017	BP	GO:0040017	positive regulation of locomotion	296	0.392297	1.68618	9.999e-05	0.00242704	0.00187151	2742	tags=47%, list=32%, signal=33%	6348/6678/9590/1950/3690/378938/388/9806/650/284119/29126/958/3627/23604/5168/2113/3678/3655/4254/8829/5091/57580/57698/7015/347733/199/154810/306/10396/9564/728/4680/79846/1277/1436/6387/3576/4921/2149/2335/2621/2822/10457/1839/3082/3162/3488/59352/4035/4233/4318/5031/5063/5154/5155/5175/10769/5649/389/22800/10500/8482/153769/6546/10253/7057/7422/7448/81029/90/91/9510/301/84913/655/659/857/6352/…
GO:0042060	BP	GO:0042060	wound healing	256	0.378225	1.6193	9.999e-05	0.00242704	0.00187151	1730	tags=35%, list=20%, signal=29%	2162/57175/26509/5627/6678/10855/3690/958/2113/2534/2934/3678/23764/5579/6279/5270/7099/2/94/84962/246/558/825/634/1277/139818/23348/2065/2161/2149/2335/2621/3043/1839/3162/59352/58529/5026/5154/5155/5175/90102/10544/5889/389/710/6556/23657/7057/7448/7480/81029/11093/301/408/409/114897/857/23468/3491/135228/57126/960/928/1026/8837/23332/1289/780/1606/57572/50506/11221/83481/2146/2151/9002/2152/21…
GO:0042119	BP	GO:0042119	neutrophil activation	231	0.368108	1.5714	9.999e-05	0.00242704	0.00187151	2609	tags=44%, list=30%, signal=32%	2212/272/968/2213/10855/6280/340061/929/1116/2934/57580/6279/6402/51816/290/306/10396/718/728/634/4680/5199/23406/1522/3576/10875/9535/3043/25840/4318/4973/5175/10213/25797/8635/27180/6556/6518/6590/374403/203068/221/230/240/64333/6352/10576/57126/960/23601/8895/83716/1512/1520/1536/23191/79930/79980/8288/2171/2204/2357/2358/84443/2717/2896/3146/3240/388697/3310/84329/8807/3683/8514/116844/199675…
GO:0042127	BP	GO:0042127	regulation of cell proliferation	754	0.345841	1.51377	9.999e-05	0.00242704	0.00187151	2913	tags=44%, list=34%, signal=32%	6347/2013/3437/1545/8519/6678/1646/604/414062/1524/1950/2213/11148/10855/3690/378938/4914/26471/133/8644/358/56271/650/672/83990/1490/29126/958/990/3627/1803/55840/2113/3109/3115/3559/4254/8829/639/5742/5270/6472/6775/7015/7099/677/1636/94/100/199/675/162681/728/10203/923/1017/1019/634/4680/1051/1436/1522/6387/3576/4921/54567/1869/51162/1960/5169/2065/2119/2149/2261/2335/2621/2822/10457/8334/1839…
GO:0042325	BP	GO:0042325	regulation of phosphorylation	706	0.332828	1.45568	9.999e-05	0.00242704	0.00187151	2819	tags=42%, list=33%, signal=31%	6347/2013/6348/83666/9590/414062/1524/1950/2213/3690/4914/26471/9088/9467/493/650/1490/9134/958/993/990/1116/63967/3627/54541/5168/2534/9290/83729/3678/3655/4254/8829/54625/5933/6472/7099/1636/94/84632/199/84962/246/641/718/728/1019/8851/634/1163/1436/4921/1742/1844/1848/1894/1942/2043/2065/2149/2203/338557/221472/2258/2261/2335/4616/2621/9535/10457/1839/57493/51191/3280/3082/28996/3486/3487/3624…
GO:0042327	BP	GO:0042327	positive regulation of phosphorylation	489	0.357307	1.5526	9.999e-05	0.00242704	0.00187151	2411	tags=40%, list=28%, signal=31%	6347/2013/6348/83666/9590/414062/1524/1950/2213/3690/4914/26471/493/650/1490/958/990/1116/63967/5168/2534/9290/83729/3678/3655/4254/8829/54625/7099/1636/94/84632/199/84962/246/718/728/8851/1163/1436/4921/1742/1848/1894/1942/2043/2065/2149/338557/221472/2258/2261/4616/2621/10457/1839/3280/3082/28996/3486/3487/3624/128239/6453/3976/4035/4055/5600/22924/4318/54892/4853/5031/5063/8654/5154/5155/5175/…
GO:0042330	BP	GO:0042330	taxis	318	0.351352	1.51295	9.999e-05	0.00242704	0.00187151	2545	tags=41%, list=29%, signal=30%	6347/57175/55715/5142/6348/414062/1524/1588/3690/4914/4983/6280/3627/2920/23604/5168/2534/2841/8829/57580/6279/347733/30817/199/9564/728/8851/1436/6387/3576/10800/1942/1959/1960/2043/2621/10457/1839/3082/3398/59352/4035/4233/4897/5154/5155/11251/5872/5649/54538/10500/8482/6441/7057/7422/7436/3730/301/7984/409/627/655/659/387695/727/6367/6352/3491/729230/972/112616/1435/6373/23191/1672/9732/1843/1…
GO:0042493	BP	GO:0042493	response to drug	449	0.329637	1.42983	9.999e-05	0.00242704	0.00187151	3035	tags=45%, list=35%, signal=31%	5142/1545/6678/19/4914/388/8140/5244/358/493/672/929/54541/1719/2113/114907/2534/2934/4837/7703/5888/8438/6279/6999/7298/100/199/440/445/558/641/760/768/999/1017/1019/8851/1277/1393/1503/6387/1848/1894/1978/2203/2348/2353/2621/2822/3043/3082/3162/3490/3624/3757/3956/4036/4151/4176/4233/4502/4602/22861/4830/1728/10062/5026/5106/5111/5155/10213/10280/6556/6510/113235/6541/23657/6546/6948/7057/55151…
GO:0042802	MF	GO:0042802	identical protein binding	752	0.31991	1.40022	9.999e-05	0.00242704	0.00187151	1896	tags=31%, list=22%, signal=27%	57175/3437/9619/6348/604/8553/3690/4914/56952/57823/340061/259173/358/672/284119/1052/10036/23604/1649/1803/2113/2534/115361/2941/51171/22807/55388/4210/11343/4436/5091/5888/6241/6472/6775/6999/7015/7099/7298/9429/11332/51816/154810/440/445/586/597/27018/641/675/716/27101/833/919/923/999/634/4680/1051/1180/9069/23562/1277/1436/1491/1496/1503/64858/79077/1894/2043/2057/2065/2203/2261/2335/2617/263…
GO:0042981	BP	GO:0042981	regulation of apoptotic process	649	0.374033	1.6332	9.999e-05	0.00242704	0.00187151	1876	tags=36%, list=22%, signal=30%	6347/3437/6348/1545/1831/9590/347902/50650/604/1524/4914/26471/388/6280/133/8644/358/27113/650/672/51063/84674/837/1490/29126/958/3627/23604/1649/2534/2934/2537/83729/3665/3678/3655/4254/23263/4436/4582/8829/7703/57580/6279/5272/7015/677/100/199/79658/440/558/23621/9564/597/27018/90427/728/825/1019/8851/4680/1051/10370/1436/1491/1522/6387/220042/1848/1869/1894/1942/1960/2065/2149/338557/221472/50…
GO:0043062	BP	GO:0043062	extracellular structure organization	233	0.410129	1.75079	9.999e-05	0.00242704	0.00187151	2247	tags=43%, list=26%, signal=33%	871/9619/84168/1545/6678/19/3690/3914/9806/1490/1291/1803/2113/6624/3678/3655/8516/285590/2/999/1071/1307/1277/85301/1299/55790/4921/2335/2621/7087/3679/3696/4035/4320/4318/169611/5154/5155/5175/23187/90102/9644/6696/7045/7057/55151/7448/8038/9719/54507/165/63827/602/655/824/3491/960/8837/23332/1303/7373/340267/1289/83716/1513/1520/780/2022/30001/56605/2192/10516/2200/2201/2264/2331/60495/5654/33…
GO:0043065	BP	GO:0043065	positive regulation of apoptotic process	294	0.401819	1.72663	9.999e-05	0.00242704	0.00187151	2410	tags=45%, list=28%, signal=33%	6347/6348/1545/9590/50650/604/26471/388/6280/133/8644/27113/650/51063/837/1490/29126/958/1649/2934/3655/23263/57580/6279/23621/27018/90427/1019/8851/1522/1848/1869/1894/2149/221472/50486/4616/2822/3162/3433/3486/3624/81618/6453/8997/4055/9833/4318/4602/4605/22861/1728/84033/5063/5414/6272/8406/7027/7052/7057/7078/8743/9966/7153/10537/7480/7533/54507/301/9828/26084/7984/408/409/468/10018/274/655/6…
GO:0043066	BP	GO:0043066	negative regulation of apoptotic process	359	0.354742	1.53204	9.999e-05	0.00242704	0.00187151	1933	tags=35%, list=22%, signal=28%	6347/3437/1831/347902/604/1524/4914/26471/358/672/2534/2537/3665/3678/3655/4254/4436/4582/8829/7703/5272/7015/100/199/79658/440/558/597/27018/728/825/4680/1051/10370/1436/1491/6387/220042/1942/1960/2065/2149/338557/2621/3082/28996/3162/126393/3560/6453/4035/4085/407975/4318/4853/1728/5166/10769/5896/255488/153769/9021/10253/7057/8793/8743/7374/7422/7516/10449/90/51129/301/307/51074/367/384/408/40…
GO:0043067	BP	GO:0043067	regulation of programmed cell death	655	0.375283	1.63885	9.999e-05	0.00242704	0.00187151	1876	tags=36%, list=22%, signal=31%	6347/3437/6348/1545/1831/9590/347902/50650/604/1524/4914/26471/388/6280/133/8644/358/27113/650/672/51063/84674/837/1490/29126/958/3627/23604/1649/2534/2934/2537/83729/3665/3678/3655/4254/23263/4436/4582/8829/7703/57580/6279/5272/7015/677/100/199/79658/440/558/23621/9564/597/27018/90427/728/825/1019/8851/4680/1051/10370/1436/1491/1522/6387/220042/1848/1869/1894/1942/1960/2065/2149/338557/221472/50…
GO:0043068	BP	GO:0043068	positive regulation of programmed cell death	296	0.406133	1.74565	9.999e-05	0.00242704	0.00187151	2410	tags=45%, list=28%, signal=34%	6347/6348/1545/9590/50650/604/4914/26471/388/6280/133/8644/27113/650/51063/837/1490/29126/958/1649/2934/3655/23263/57580/6279/23621/27018/90427/1019/8851/1522/1848/1869/1894/2149/221472/50486/4616/2822/3162/3433/3486/3624/81618/6453/8997/4055/9833/4318/4602/4605/22861/1728/84033/5063/5414/6272/8406/7027/7052/7057/7078/8743/9966/7153/10537/7480/7533/54507/301/9828/26084/7984/408/409/468/10018/274/…
GO:0043069	BP	GO:0043069	negative regulation of programmed cell death	364	0.357894	1.54605	9.999e-05	0.00242704	0.00187151	1933	tags=35%, list=22%, signal=29%	6347/3437/1831/347902/604/1524/4914/26471/358/672/2534/2537/3665/3678/3655/4254/4436/4582/8829/7703/5272/7015/100/199/79658/440/558/597/27018/728/825/4680/1051/10370/1436/1491/6387/220042/1942/1960/2065/2149/338557/2621/3082/28996/3162/126393/3560/6453/4035/4085/4233/407975/4318/4853/1728/5166/10769/5896/255488/153769/9021/10253/7057/8793/8743/7374/7422/7516/10449/90/51129/301/307/51074/367/384/4…
GO:0043085	BP	GO:0043085	positive regulation of catalytic activity	616	0.348775	1.5217	9.999e-05	0.00242704	0.00187151	3234	tags=51%, list=37%, signal=34%	6347/2013/84168/6348/151636/54453/57514/414062/1950/3690/4914/26471/4983/6280/259173/91947/493/27113/650/837/1490/958/990/1116/63967/1719/2534/9290/2934/3655/4254/4210/4436/23397/8829/57580/25780/5983/6279/285590/117289/23158/7015/7099/9744/1636/84632/84962/79658/58504/83478/27018/728/8851/1163/1436/4921/1742/23234/139818/23348/1848/1894/1942/2043/2065/2149/221472/2258/2261/2335/4616/2621/9535/28…
GO:0043086	BP	GO:0043086	negative regulation of catalytic activity	323	0.335428	1.445	9.999e-05	0.00242704	0.00187151	2897	tags=44%, list=34%, signal=30%	871/151636/83666/5627/9088/9467/9806/358/493/2537/3434/5272/5270/23145/2/84962/306/27018/718/720/721/634/1844/1848/114794/4616/2621/9535/57493/3082/389119/3843/4085/4133/84930/4318/58529/4883/1728/113791/23645/5896/710/153769/6590/9021/6653/6272/10253/80725/54843/7057/7078/51377/7422/7448/84059/51129/3730/81611/301/307/408/409/9532/274/332/655/727/857/868/729230/135228/960/1026/1028/1032/1050/883…
GO:0043207	BP	GO:0043207	response to external biotic stimulus	437	0.378873	1.64321	9.999e-05	0.00242704	0.00187151	2817	tags=46%, list=33%, signal=32%	6347/3437/5142/6348/151636/8519/4940/83666/6678/19/9590/968/1524/55601/2213/4600/6280/340061/133/650/929/29126/958/3627/2920/54541/115361/55008/2537/3434/3559/3665/4360/4939/91543/64108/6279/5272/7099/306/164668/445/558/116071/55509/718/721/728/923/1019/1051/5199/23406/1439/6387/3576/79132/2149/10875/2353/2634/2678/8349/51191/3429/10964/3433/24138/10410/3543/3566/3669/23658/5600/4502/4599/22861/1…
GO:0043235	CC	GO:0043235	receptor complex	245	0.362119	1.54831	9.999e-05	0.00242704	0.00187151	1858	tags=36%, list=22%, signal=29%	1950/3690/4914/650/929/958/2564/3597/3559/3678/3655/8516/8829/7099/94/558/10203/919/923/634/1436/1439/4921/1742/2043/2065/2261/2565/2570/3560/3563/3566/3679/3696/4035/4036/4233/4853/10062/4973/55333/7049/28526/7436/57406/90/91/92/93/84059/659/960/972/925/8973/1141/1380/780/2022/1969/2264/2322/9568/2563/2675/2690/26996/81491/2897/2899/2900/2901/2906/3077/3329/3590/3593/8809/8807/3561/133396/50939/…
GO:0043299	BP	GO:0043299	leukocyte degranulation	245	0.373909	1.59872	9.999e-05	0.00242704	0.00187151	2609	tags=44%, list=30%, signal=32%	6348/2212/272/968/2213/10855/284021/6280/340061/929/1116/2934/6279/6402/51816/30817/290/306/10396/718/728/634/4680/5199/23406/1522/10875/9535/3043/3162/3566/25840/4318/4973/5175/10213/25797/8635/27180/6556/6518/6590/374403/203068/221/230/240/64333/729230/10576/57126/960/23601/8895/83716/1512/1520/1536/23191/79930/79980/8288/2171/2204/2357/2358/84443/2717/2896/3134/3146/3240/388697/3310/84329/3683…
GO:0043408	BP	GO:0043408	regulation of MAPK cascade	335	0.343878	1.48233	9.999e-05	0.00242704	0.00187151	2819	tags=44%, list=33%, signal=31%	6347/6348/9590/414062/1950/2213/4914/650/1490/958/1116/9290/83729/4254/8829/7099/84962/246/728/634/1436/1844/1848/1942/2043/2149/338557/221472/2261/2335/4616/2621/10457/3082/28996/3486/3487/3624/128239/3976/4035/4055/5600/4853/5031/5063/8654/5154/5155/8482/153769/6653/10253/55333/7057/7078/7422/148/389658/51074/367/7984/408/409/655/114897/727/857/6367/6352/3491/960/972/983/8837/22943/1815/1843/11…
GO:0043410	BP	GO:0043410	positive regulation of MAPK cascade	258	0.358081	1.53356	9.999e-05	0.00242704	0.00187151	2411	tags=40%, list=28%, signal=30%	6347/6348/9590/414062/1950/2213/4914/650/1490/958/1116/9290/4254/8829/7099/84962/246/728/1436/1848/1942/2043/2149/338557/221472/2261/4616/2621/10457/3082/28996/3486/3487/128239/3976/4035/4055/5600/4853/5031/5063/8654/5154/5155/8482/153769/10253/7057/7422/148/389658/367/7984/408/409/114897/727/6367/6352/960/972/983/8837/22943/1815/1849/10595/2146/2246/8817/2264/2322/2357/2358/64762/2690/152007/285…
GO:0043436	BP	GO:0043436	oxoacid metabolic process	479	0.342146	1.48603	9.999e-05	0.00242704	0.00187151	2619	tags=40%, list=30%, signal=30%	1545/259307/1645/1646/501/9435/92126/1950/26471/26227/51268/8605/29968/23428/9806/10157/8644/493/672/23670/54541/8528/1719/84706/11343/8974/5091/5742/6472/6999/7298/10090/39/11332/6296/1109/246/440/445/8704/586/718/833/634/51363/548596/1159/55790/1491/1503/4051/2203/2348/2617/2653/2678/2875/401494/3082/84842/3638/4200/166785/10797/55706/1728/10062/2494/79023/114880/5106/5155/5166/5226/5625/10213/…
GO:0043549	BP	GO:0043549	regulation of kinase activity	376	0.352878	1.52532	9.999e-05	0.00242704	0.00187151	3143	tags=51%, list=36%, signal=34%	2013/1950/3690/4914/9088/9467/493/650/9134/958/993/990/1116/63967/3627/2534/4254/5933/7099/1636/84632/84962/641/728/1019/8851/634/1163/1436/4921/1742/1844/1848/1894/1942/2043/2065/2149/221472/2258/2261/4616/2621/9535/57493/51191/3082/389119/3843/128239/6453/5600/22924/54892/5063/8654/5154/5155/113791/5649/6556/9021/6653/10253/80725/7057/9966/7273/7422/7436/93/148/389658/7984/408/627/655/79866/727…
GO:0044092	BP	GO:0044092	negative regulation of molecular function	455	0.327686	1.42196	9.999e-05	0.00242704	0.00187151	2897	tags=43%, list=34%, signal=30%	871/55917/1545/151636/83666/5627/8553/26471/9088/9467/9806/358/493/1649/2669/2537/3434/6236/5272/5270/23145/165904/2/1636/84962/306/27018/718/720/721/784/634/1393/1522/1844/1848/1869/114794/4616/2621/9535/57493/3082/3162/3398/3433/389119/3843/4085/4133/84930/4233/4318/58529/4883/1728/5155/113791/23645/5792/5896/710/6441/153769/6590/9021/6653/6272/10253/80725/54843/7057/7078/51377/7422/7448/84059/…
GO:0044093	BP	GO:0044093	positive regulation of molecular function	762	0.349987	1.53221	9.999e-05	0.00242704	0.00187151	3236	tags=51%, list=38%, signal=35%	6347/2013/84168/6348/151636/83666/54453/57514/414062/1524/1950/3690/4914/26471/4983/6280/340061/259173/91947/493/27113/650/837/1490/958/990/1116/63967/1649/1719/2534/9290/2934/3655/4254/4210/4436/23397/8829/57580/5579/25780/5983/121268/6279/285590/117289/23158/7015/7099/9744/1636/84632/84962/306/79658/58504/83478/27018/728/784/825/113130/8851/81620/1163/1436/1491/4921/1742/23234/139818/23348/1848…
GO:0044283	BP	GO:0044283	small molecule biosynthetic process	352	0.369338	1.59394	9.999e-05	0.00242704	0.00187151	2688	tags=44%, list=31%, signal=32%	5142/9619/272/1588/92126/1950/26471/26227/56952/29968/10157/133/8644/493/650/672/54541/1719/84706/11343/5091/5742/6472/10090/39/11332/6296/100/51816/1109/246/440/554235/445/586/634/51363/1491/1503/79077/1841/1854/5169/2203/2678/2875/401494/3613/3638/166785/55706/4830/4833/10062/4521/79023/114880/5031/5106/8654/5155/5166/23590/5226/6319/6697/7083/7374/7378/225/84696/10449/31/84532/55902/230/240/24…
GO:0044403	BP	GO:0044403	symbiont process	319	0.355396	1.53058	9.999e-05	0.00242704	0.00187151	1945	tags=34%, list=23%, signal=28%	6347/3075/6348/8519/4940/1524/2213/3690/340061/358/1803/2534/2934/3122/3434/3665/3678/4360/5091/5933/91543/5272/7298/290/164668/558/699/919/999/79682/1436/1500/6387/3576/79132/2335/2621/28996/3429/24138/10410/3560/3843/3669/6453/3956/4055/4233/4599/55706/5819/22861/2494/79023/4938/5111/5422/84440/6441/10572/6510/6590/6773/6839/7153/7374/91703/10189/8905/140564/60489/10018/274/857/23468/6352/72923…
GO:0044419	BP	GO:0044419	interspecies interaction between organisms	330	0.354825	1.52936	9.999e-05	0.00242704	0.00187151	1945	tags=34%, list=23%, signal=28%	6347/3075/6348/8519/4940/1524/2213/3690/6280/340061/358/1803/2534/2934/3122/3434/3665/3678/4360/5091/5933/91543/5272/7298/290/164668/558/699/919/999/79682/1436/1500/6387/3576/79132/2335/2621/28996/3429/24138/10410/3560/3843/3669/6453/3956/4055/4233/4599/55706/5819/22861/2494/79023/4938/5111/5422/5551/84440/6441/10572/6510/6590/6773/6839/7153/7374/91703/10189/8905/140564/60489/8542/10018/274/857/2…
GO:0044427	CC	GO:0044427	chromosomal part	401	0.396452	1.71598	9.999e-05	0.00242704	0.00187151	2801	tags=49%, list=32%, signal=35%	83666/604/157570/55723/672/8318/10036/8208/9837/51659/8365/55388/4173/4174/4436/4582/23397/4998/23594/7703/23649/5888/5933/5983/7015/79000/641/675/699/113130/1017/1019/81620/1051/64946/55839/55166/79682/387103/1107/10370/64858/1763/8110/1869/146956/2237/84296/8330/8334/3015/8349/8520/3070/4085/4172/4175/4176/54069/27085/4605/54892/10062/79023/55010/5111/10769/5422/10714/10622/5557/5558/56852/5889…
GO:0044432	CC	GO:0044432	endoplasmic reticulum part	486	0.327394	1.42247	9.999e-05	0.00242704	0.00187151	2856	tags=42%, list=33%, signal=30%	871/2052/9619/1545/5627/19/1588/9088/8605/340061/837/1291/9249/342184/2534/3115/3119/3122/3127/11343/8974/5742/91543/55304/9911/54972/23120/57205/57198/23621/718/720/168448/5199/1307/1277/85301/1299/1522/4051/23109/2335/2348/2621/51280/401494/3117/3162/3429/3486/3487/3488/3490/3601/3638/11015/3956/84879/11320/10335/4599/4853/114880/5154/5155/6490/23645/8635/54894/6319/6383/6441/6446/81537/10280/2…
GO:0044433	CC	GO:0044433	cytoplasmic vesicle part	617	0.339188	1.47991	9.999e-05	0.00242704	0.00187151	2806	tags=42%, list=33%, signal=30%	2162/3959/84168/151636/2212/26509/5627/6414/6678/272/968/1950/10855/3690/4914/23682/388/6280/9467/340061/440279/929/29126/1116/2841/2934/3109/3115/3119/3122/3127/3665/3801/4360/6279/6402/7099/2/9744/100/51816/113146/290/306/23120/10396/23621/8938/8927/718/728/634/4680/5199/23406/1522/1742/8448/2043/221472/10875/2335/2348/2621/9535/10457/3043/1839/3082/3108/3117/10410/3601/11015/4035/4036/25840/43…
GO:0044454	CC	GO:0044454	nuclear chromosome part	233	0.369048	1.57542	9.999e-05	0.00242704	0.00187151	2800	tags=45%, list=32%, signal=31%	157570/55723/672/8318/10036/8208/9837/51659/8365/55388/4173/4174/4436/4582/23397/4998/23594/7703/23649/5888/7015/641/675/699/113130/1051/1107/10370/64858/1763/8110/1869/146956/2237/84296/8330/8334/3015/8520/4172/4175/4176/10062/5111/5422/10714/10622/5557/5558/54962/51377/29128/11169/10189/81611/367/80816/57658/23468/983/1058/64105/79172/79980/2146/8468/3005/8329/723790/8357/8353/121504/8370/8366/…
GO:0044770	BP	GO:0044770	cell cycle phase transition	280	0.420975	1.80687	9.999e-05	0.00242704	0.00187151	1778	tags=40%, list=21%, signal=33%	6347/84515/9088/58480/493/672/9134/993/8318/990/63967/1719/55388/4173/4174/4582/4998/23594/22822/23649/5933/6241/7015/7298/677/199/84962/586/641/699/168448/113130/1017/1019/81620/51514/1869/1978/10457/3398/3624/128239/11178/4085/84930/4172/4175/4176/9833/27085/5111/10769/10733/5422/5557/5558/10213/5889/54908/7027/90381/54962/203068/10537/7480/90/91/9510/301/79915/79866/84446/7832/9184/387695/901/…
GO:0044772	BP	GO:0044772	mitotic cell cycle phase transition	264	0.428384	1.83561	9.999e-05	0.00242704	0.00187151	1778	tags=41%, list=21%, signal=34%	6347/84515/9088/58480/672/9134/993/8318/990/63967/1719/55388/4173/4174/4582/4998/23594/22822/23649/5933/6241/7015/7298/677/199/84962/586/641/699/168448/113130/1017/1019/81620/51514/1869/1978/10457/3398/3624/128239/11178/4085/84930/4172/4175/4176/9833/27085/5111/10769/10733/5422/5557/5558/10213/5889/54908/7027/90381/203068/10537/7480/90/91/9510/301/79915/79866/84446/7832/9184/901/79616/8555/995/98…
GO:0044843	BP	GO:0044843	cell cycle G1/S phase transition	131	0.508698	2.12013	9.999e-05	0.00242704	0.00187151	1675	tags=47%, list=19%, signal=39%	6347/84515/58480/493/9134/993/8318/990/1719/55388/4173/4174/4582/4998/23594/23649/5933/6241/7015/7298/199/586/1017/1019/81620/1869/1978/10457/3398/3624/128239/4172/4175/4176/27085/5111/10769/5422/5557/5558/7027/90/91/9510/301/7832/387695/995/983/1021/1026/1032/10106/10217/1543/10926/79733/2146/26271/2735/51053/29933
GO:0044877	MF	GO:0044877	protein-containing complex binding	506	0.360378	1.56737	9.999e-05	0.00242704	0.00187151	1940	tags=35%, list=22%, signal=29%	871/57175/2013/2217/84168/2212/6678/23336/19/2213/3690/3914/84515/4606/55930/23682/9806/1490/4261/63967/6624/2534/2934/3109/3122/3678/3655/4436/57698/165904/94/199/84962/113130/1019/8851/64946/1307/10391/23406/64506/1496/6387/64858/4921/1742/9103/2335/10468/9535/59345/10457/3015/3108/7087/3696/4035/4318/57644/10529/4830/5111/5154/5155/23481/10769/10213/8624/5792/56852/201191/8482/6632/6653/54908/…
GO:0045055	BP	GO:0045055	regulated exocytosis	363	0.383768	1.65773	9.999e-05	0.00242704	0.00187151	2748	tags=46%, list=32%, signal=33%	2162/3959/6348/2212/5627/6414/6678/272/968/1950/2213/10855/3690/284021/6280/340061/440279/929/1116/2934/5579/6279/6402/2/51816/30817/290/306/10396/23621/8938/718/728/634/4680/5199/23406/1393/1522/8448/10875/2335/2621/10755/9535/3043/3082/3162/3566/25840/4318/4973/5154/5155/5175/112476/10213/25797/8635/710/27180/6556/6518/6590/8676/8407/374403/7057/7078/7273/203068/7422/26154/87/148/221/230/240/64…
GO:0045087	BP	GO:0045087	innate immune response	415	0.399104	1.72899	9.999e-05	0.00242704	0.00187151	1862	tags=37%, list=22%, signal=30%	6347/3075/3437/6348/151636/8519/4940/83666/80216/414062/1524/55601/2213/4600/6280/57823/340061/837/929/4261/2534/115361/2934/3115/3119/3122/3127/2537/3434/3665/4210/4360/4582/4939/54625/639/91543/6279/5272/6472/7099/54210/79865/2/199/164668/445/558/51279/716/717/718/720/721/923/634/5199/1436/79132/2161/2634/8349/51191/3117/3429/3433/24138/10410/3543/3669/3902/4502/4599/5819/22861/9111/10062/4938/…
GO:0045321	BP	GO:0045321	leukocyte activation	609	0.366407	1.59852	9.999e-05	0.00242704	0.00187151	2917	tags=47%, list=34%, signal=33%	6347/6348/2212/272/604/29760/968/2213/11148/10855/284021/64332/4914/6280/57823/340061/929/29126/958/1116/1803/2177/2534/2841/2934/3109/3115/3559/4436/639/57580/5579/91543/6279/6402/7099/79865/677/100/51816/30817/199/290/306/10396/558/116071/55509/718/728/923/634/4680/1051/5199/23406/1503/1522/3576/54567/139818/1960/5169/9156/10875/2621/9535/10457/3043/3070/3280/3162/3398/3543/3566/3624/3902/3956/…
GO:0045596	BP	GO:0045596	negative regulation of cell differentiation	332	0.335969	1.44819	9.999e-05	0.00242704	0.00187151	2828	tags=43%, list=33%, signal=30%	9619/6348/19/604/2213/3690/650/3627/1649/9290/8365/8829/349667/7015/7099/677/94/8851/634/1071/1522/26052/1869/1942/2043/2258/10875/3280/3398/3488/3566/3624/3638/81618/3902/3956/4035/4133/4320/4318/54892/4830/10062/4974/5155/10769/10500/8482/6653/6272/6696/7041/7422/7480/7533/6935/11173/84059/301/53335/627/655/857/952/972/1021/1041/8837/51208/1289/23603/23258/57540/22943/1809/11221/2202/1949/2146/…
GO:0045786	BP	GO:0045786	negative regulation of cell cycle	273	0.377453	1.61932	9.999e-05	0.00242704	0.00187151	2502	tags=44%, list=29%, signal=32%	6347/604/26471/388/650/672/83990/8318/990/63967/1649/4436/4582/4998/7703/5888/5933/6241/677/641/699/168448/1017/1019/8851/81620/3576/64858/220042/1763/51514/1869/146956/2621/10457/3398/3624/3843/3976/4085/27085/4853/5111/10769/23645/10213/54908/7027/7057/90381/54962/7153/22846/79968/7480/55055/11130/274/655/84446/694/7832/9184/387695/23468/8555/995/983/1021/1026/1028/1032/1050/1111/10106/10217/29…
GO:0045787	BP	GO:0045787	positive regulation of cell cycle	173	0.388169	1.63896	9.999e-05	0.00242704	0.00187151	1874	tags=38%, list=22%, signal=30%	1950/672/1490/993/8318/990/4582/7015/199/440/675/168448/113130/1017/1019/8851/81620/10370/1163/51514/1869/1894/1978/2237/10755/3280/3398/4085/22924/27085/5111/5155/10769/10733/25886/84440/5889/7027/7480/9510/301/79915/10018/685/7832/8555/995/983/1026/55835/1111/1164/1543/10926/6990/79733/9700/2124/2146/26271/2735/2852/8091/3306/3553/3741
GO:0045859	BP	GO:0045859	regulation of protein kinase activity	345	0.365627	1.57691	9.999e-05	0.00242704	0.00187151	2819	tags=46%, list=33%, signal=32%	2013/1950/3690/4914/9088/9467/493/650/9134/958/993/990/1116/63967/3627/2534/4254/7099/1636/84632/84962/641/728/1019/8851/634/1163/1436/4921/1742/1844/1848/1894/1942/2043/2065/2149/221472/2258/4616/2621/9535/57493/51191/3082/389119/3843/128239/5600/22924/54892/5063/8654/5154/5155/5649/6556/9021/6653/10253/80725/7057/9966/7273/7422/7436/93/148/389658/7984/408/627/655/79866/727/8536/29775/857/868/55…
GO:0045860	BP	GO:0045860	positive regulation of protein kinase activity	249	0.363378	1.55458	9.999e-05	0.00242704	0.00187151	2490	tags=42%, list=29%, signal=31%	2013/1950/3690/4914/493/650/958/990/1116/63967/2534/4254/7099/1636/84632/84962/728/8851/1163/1436/4921/1742/1848/1894/1942/2043/2065/2149/221472/2258/4616/2621/3082/128239/5600/22924/54892/5063/8654/5154/5155/5649/6556/10253/80725/7057/9966/7422/7436/93/148/389658/7984/408/627/79866/727/8536/29775/55704/6352/3491/972/983/1026/1164/1435/10926/22943/1815/1849/10595/2146/2246/8817/2322/2357/2690/809…
GO:0045861	BP	GO:0045861	negative regulation of proteolysis	147	0.375645	1.57485	9.999e-05	0.00242704	0.00187151	1406	tags=31%, list=16%, signal=26%	871/5627/4983/9806/358/79094/2537/5272/5270/23145/2/27018/718/720/721/1522/1942/2043/2621/10755/3082/28996/4318/5896/710/6590/6653/7057/7078/51377/7422/11326/7448/3730/408/409/274/332/727/135228/960/1032/8837/340267/286204
GO:0045930	BP	GO:0045930	negative regulation of mitotic cell cycle	145	0.400515	1.67764	9.999e-05	0.00242704	0.00187151	1675	tags=37%, list=19%, signal=31%	6347/604/672/990/63967/4436/4582/4998/5933/677/641/699/168448/1017/1019/81620/64858/220042/1869/146956/10457/4085/27085/5111/10769/10213/54908/7027/90381/54962/7153/55055/11130/655/84446/694/7832/9184/8555/995/983/1021/1026/1032/1111/10106/10217/29980/1843/79733/2146/26271/2619/29933
GO:0045937	BP	GO:0045937	positive regulation of phosphate metabolic process	515	0.348327	1.51527	9.999e-05	0.00242704	0.00187151	2411	tags=39%, list=28%, signal=30%	6347/2013/6348/83666/9590/414062/1524/1950/2213/3690/4914/26471/23682/493/650/1490/958/990/1116/63967/5168/2534/9290/83729/3678/3655/4254/8829/54625/7099/1636/94/84632/199/84962/246/718/728/8851/1163/1436/4921/1742/1848/1894/1942/2043/2065/2149/338557/221472/2258/2261/4616/2621/2822/10457/1839/3280/3082/28996/3486/3487/3624/128239/6453/3976/4035/4055/5600/22924/4318/54892/4853/5031/5063/8654/5154…
GO:0046649	BP	GO:0046649	lymphocyte activation	357	0.350863	1.51495	9.999e-05	0.00242704	0.00187151	2917	tags=45%, list=34%, signal=31%	6347/604/29760/2213/11148/64332/4914/57823/29126/958/1803/2177/2534/2841/2934/3109/3115/3559/4436/639/57580/5579/91543/7099/79865/677/100/199/558/923/634/1051/1503/54567/139818/1960/9156/10875/2621/10457/3070/3280/3398/3543/3566/3624/3902/3956/407975/4602/4853/5063/8654/5551/5896/6097/6441/6556/28526/7374/11326/6935/301/384/79915/602/11119/857/6352/729230/4064/911/30835/952/960/924/970/972/942/92…
GO:0046677	BP	GO:0046677	response to antibiotic	142	0.387506	1.62146	9.999e-05	0.00242704	0.00187151	3035	tags=52%, list=35%, signal=34%	1545/6678/388/358/929/4261/2113/2534/2934/7703/6279/7298/100/558/1277/1393/1894/1978/3043/3082/3162/4151/4233/4602/1728/5111/5155/10213/10280/6546/301/632/824/983/1141/51208/1268/1536/1543/1815/1843/2146/51022/3240/3248/3383/3399/8807/3741/23135/9314/10276/8013/5019/5074/80310/5159/65018/59338/5999/140885/6507/6531/8877/6915/8914/10628/7412/51157/18/10097/8754/112/113
GO:0046903	BP	GO:0046903	secretion	724	0.345384	1.5112	9.999e-05	0.00242704	0.00187151	2711	tags=42%, list=31%, signal=31%	2162/3959/3790/9619/6348/2212/5627/6414/6678/19/9590/272/968/1588/1950/2213/10855/3690/284021/6280/340061/440279/5244/133/358/284119/1490/929/29126/958/1116/1803/2934/4939/5579/91543/6279/6402/5270/7099/2/1636/100/51816/30817/199/290/306/10396/558/23621/8938/718/728/760/768/773/634/4680/5199/23406/1393/1436/1522/6387/8448/2065/283849/2149/338557/10875/2335/2621/10755/9535/2822/3043/3082/3162/3566…
GO:0048285	BP	GO:0048285	organelle fission	202	0.369493	1.56925	9.999e-05	0.00242704	0.00187151	2860	tags=48%, list=33%, signal=33%	1950/4600/9088/83990/9134/990/2177/23397/5888/8438/675/699/168448/113130/81620/146956/3976/4085/84930/84057/27085/113115/4599/4605/55706/5155/29893/5889/10592/54908/6773/400629/7153/7273/11130/332/655/79866/685/9184/8555/995/55143/1028/64105/201254/1111/1164/23332/11144/79075/79980/1843/9700/2175/57697/286151/26271/63979/2827/83903/3306/3553/3835/11004/24137/3833/90417/9735/51537/4603/440145/2331…
GO:0048514	BP	GO:0048514	blood vessel morphogenesis	305	0.372944	1.60413	9.999e-05	0.00242704	0.00187151	2905	tags=46%, list=34%, signal=32%	6347/2013/1545/6678/1524/1950/2034/10855/3690/388/133/358/672/1490/958/23670/1116/3627/5168/2113/3678/8829/639/5579/7015/677/94/154810/290/306/58504/83478/718/728/10203/634/3576/54567/1870/1942/51162/1960/2335/2348/2822/10457/57493/3280/3082/28996/3162/126393/3696/4035/4036/4897/5154/5175/10769/54538/10253/90627/55333/7045/7049/7057/22846/7422/90/8038/577/79924/51421/51129/301/8862/187/659/694/29…
GO:0048534	BP	GO:0048534	hematopoietic or lymphoid organ development	444	0.332489	1.44237	9.999e-05	0.00242704	0.00187151	2917	tags=43%, list=34%, signal=30%	6348/604/29760/2034/157570/2213/64332/4914/1052/2113/2177/2841/9290/8365/55008/3559/3665/4254/4436/639/57580/5579/91543/7099/10100/677/1636/100/558/116071/55509/675/760/634/1051/10370/1436/54567/139818/1960/10875/2353/10468/2621/3280/28996/3398/3566/3624/84623/3902/3956/3976/4055/4151/9833/407975/4318/4602/54892/4830/4853/128506/8544/10213/338382/5896/6097/9644/29887/85439/7049/7057/7153/10537/74…
GO:0048585	BP	GO:0048585	negative regulation of response to stimulus	720	0.341453	1.49378	9.999e-05	0.00242704	0.00187151	2905	tags=44%, list=34%, signal=32%	6347/57175/5627/604/1524/1588/1950/2213/133/493/650/672/929/79094/1649/54541/115265/9249/2113/2187/2534/2841/2537/3559/3655/4210/4582/8829/54625/7703/5579/5933/5272/5270/7015/7099/2/100/199/84962/246/79000/23621/597/784/10203/634/153222/1393/1491/1496/1500/6387/3576/220042/79132/54567/1844/1848/1942/51162/5169/2043/2065/2161/2203/338557/10875/10468/2621/64388/1839/57493/3082/28996/3162/3486/3487/…
GO:0048646	BP	GO:0048646	anatomical structure formation involved in morphogenesis	527	0.353478	1.53826	9.999e-05	0.00242704	0.00187151	2813	tags=43%, list=33%, signal=31%	6347/2013/1545/26509/6678/604/793/1524/1950/2034/24147/10855/3690/3914/4606/4983/388/133/358/672/1490/958/23670/1116/1291/3627/5168/2113/342184/3678/3655/8516/8829/5579/85461/7015/94/100/154810/290/306/58504/83478/718/728/10203/825/8851/634/10370/1277/3576/54567/1870/1942/51162/1959/1960/2335/2348/2822/10457/3280/8820/3082/28996/3162/126393/3566/3624/3679/3696/4036/4318/58529/10529/5819/4897/8403…
GO:0048870	BP	GO:0048870	cell motility	796	0.344345	1.50789	9.999e-05	0.00242704	0.00187151	2892	tags=43%, list=34%, signal=32%	6347/57175/2013/5142/6348/1545/8519/83666/5627/6678/9590/414062/1524/1588/1950/3690/3914/378938/4983/388/6280/8140/23428/9806/493/56271/650/284119/1490/29126/958/3627/2920/23604/54541/1803/5168/2113/6624/2534/2841/3678/3655/4254/8829/57580/11156/6279/6402/5270/57698/7015/54210/347733/1636/94/100/30817/199/84962/154810/306/348110/10396/558/9564/728/999/8851/634/4680/79846/10370/1277/1436/1496/6387…
GO:0048878	BP	GO:0048878	chemical homeostasis	491	0.319566	1.38867	9.999e-05	0.00242704	0.00187151	3062	tags=45%, list=35%, signal=31%	9619/6348/19/1645/793/1524/2034/23682/6280/23428/5244/133/358/84239/493/958/3627/1649/2534/2841/9290/2537/3434/5579/6279/55800/11346/9429/6296/360/478/25825/8938/728/760/773/784/825/1071/6387/10800/1742/2149/100132074/2621/2822/9843/3162/3488/3638/3757/3956/4035/4233/4502/4830/10062/2494/4938/5026/5031/5106/5166/6344/143686/6441/6556/1318/113235/83697/23657/6546/285195/29887/8614/7052/55151/15821…
GO:0050727	BP	GO:0050727	regulation of inflammatory response	191	0.383709	1.6262	9.999e-05	0.00242704	0.00187151	2896	tags=47%, list=34%, signal=32%	3075/6348/5627/604/414062/1588/2213/64332/26471/6280/2113/2177/3559/4210/11343/6279/7099/2/100/716/717/718/720/721/728/10203/923/1051/5199/5169/2161/338557/2678/3082/4318/22861/10062/8482/710/9021/7052/11274/11326/7448/225/301/727/6352/729230/1050/1268/1380/11221/2175/27086/2358/2679/2852/2896/3514/3593/23765/84818/3553/9173/51561/3565/9314/3949/283131/114548/171389/4907/55872/5245/118788/5734/57…
GO:0050730	BP	GO:0050730	regulation of peptidyl-tyrosine phosphorylation	133	0.44274	1.84647	9.999e-05	0.00242704	0.00187151	1827	tags=44%, list=21%, signal=35%	83666/1950/3690/9467/958/5168/2534/3678/4254/8829/54625/1636/84632/1436/1742/1942/2043/2065/2261/2621/1839/3280/3082/3976/54892/5154/5155/5175/5649/9021/80725/55620/7422/7448/90/148/389658/23568/409/627/857/868/6352/960/972/1272/1437/2322/2690/3383/3589/3592/3593/51561/133396/3565/3567/3574
GO:0050776	BP	GO:0050776	regulation of immune response	474	0.34725	1.5081	9.999e-05	0.00242704	0.00187151	2911	tags=44%, list=34%, signal=31%	3075/5142/2212/8519/83666/5627/80216/604/55601/2213/11148/64332/6280/57823/340061/929/29126/958/2534/3109/3115/3119/3122/3127/3559/3665/4436/4582/54625/5579/91543/6279/6402/5272/7099/54210/79865/2/100/30817/246/9564/54718/51279/716/717/718/720/721/728/784/919/634/5199/1277/79132/5169/10875/2353/2822/3117/3162/7087/3543/3566/3902/4602/5819/9111/10062/5063/10622/10213/338382/8482/710/6441/27180/655…
GO:0050778	BP	GO:0050778	positive regulation of immune response	373	0.345507	1.49338	9.999e-05	0.00242704	0.00187151	2414	tags=39%, list=28%, signal=29%	3075/5142/2212/83666/5627/80216/55601/2213/11148/64332/6280/340061/929/29126/958/2534/3109/3115/3119/3122/3127/3665/4436/4582/5579/91543/6279/7099/2/100/9564/54718/51279/716/717/718/720/721/728/784/919/634/5199/79132/2822/3117/3543/3566/3902/4602/5819/10062/5063/10622/10213/338382/8482/710/6441/6556/9473/7100/28526/11326/7448/301/409/79915/11119/10384/727/857/6352/729230/57126/911/30835/10666/952…
GO:0050801	BP	GO:0050801	ion homeostasis	344	0.333683	1.43887	9.999e-05	0.00242704	0.00187151	2828	tags=42%, list=33%, signal=30%	9619/6348/19/793/1524/2034/23682/6280/23428/133/84239/493/958/3627/1649/2534/2841/9290/2537/5579/6279/55800/11346/9429/478/728/760/773/784/825/1071/6387/10800/1742/2149/9843/3162/3757/4035/4502/5026/5031/5166/6556/1318/113235/83697/23657/6546/285195/29887/8614/7052/55151/148/9472/288/187/468/491/245973/534/554/56898/114897/794/857/6352/729230/952/10518/1193/1203/54982/1268/6373/79901/84649/27185/…
GO:0050817	BP	GO:0050817	coagulation	149	0.376694	1.58025	9.999e-05	0.00242704	0.00187151	1730	tags=34%, list=20%, signal=28%	2162/5627/10855/3690/958/2534/23764/5579/5270/7099/2/558/634/1277/139818/23348/2161/2149/2621/3043/5026/5154/5155/10544/5889/710/23657/7057/7448/11093/408/409/114897/857/23468/57126/928/1606/57572/2151/9002/2152/2192/2769/54331/2815/8357/126961/333932/8353/3045
GO:0050863	BP	GO:0050863	regulation of T cell activation	173	0.375319	1.5847	9.999e-05	0.00242704	0.00187151	2910	tags=48%, list=34%, signal=32%	6347/604/2213/11148/64332/29126/1803/2177/2534/2934/3109/3115/3559/639/100/199/923/634/1051/1960/10875/10457/3280/3566/3902/3956/4602/5063/8654/5896/6441/11326/6935/301/384/857/6352/729230/30835/970/972/942/11221/1949/2175/2737/3077/3113/3142/3146/3329/3485/3592/3593/3553/51561/3565/3574/3575/3662/3718/3965/114548/5058/5074/5621/5788/6385/140885/10326/57864/8651/9840/7037/7070/201633/79626/27242/…
GO:0050865	BP	GO:0050865	regulation of cell activation	302	0.369074	1.58706	9.999e-05	0.00242704	0.00187151	2917	tags=47%, list=34%, signal=32%	6347/6348/604/2213/11148/284021/64332/1490/29126/958/1803/2177/2534/2934/3109/3115/3559/4436/639/5270/7099/677/100/30817/199/558/825/923/634/1051/1960/5169/10875/2621/10457/3280/3162/3398/3543/3566/3624/3902/3956/407975/4602/5819/10062/5063/8654/5154/5155/5896/6441/7057/28526/11326/6935/301/384/79915/114897/857/6352/729230/57126/30835/10666/952/970/972/942/928/1026/1050/1141/1268/11221/1949/2175/…
GO:0050878	BP	GO:0050878	regulation of body fluid levels	221	0.367018	1.56462	9.999e-05	0.00242704	0.00187151	1776	tags=34%, list=21%, signal=28%	2162/2013/5627/10855/3690/133/358/958/2534/23764/4939/5579/5270/7099/2/100/360/558/634/1277/10391/139818/23348/2161/2149/2621/3043/57493/8997/4233/4830/4883/10062/5026/5154/5155/10544/5889/710/23657/54843/7057/7422/7448/26154/11093/8862/187/408/409/554/685/114897/857/23468/57126/928/780/1606/57572/2151/9002/2152/2192/2702/2769/54331/2815/8357/126961/333932/8353/3045/3099/388697/3291
GO:0050900	BP	GO:0050900	leukocyte migration	244	0.3689	1.5773	9.999e-05	0.00242704	0.00187151	1866	tags=34%, list=22%, signal=28%	6347/5142/6348/5627/414062/1524/1588/3690/6280/8140/23428/3627/2920/23604/2534/2841/3678/3655/4254/57580/6279/6402/54210/100/30817/199/728/634/4680/1277/6387/3576/2335/2621/3162/3543/4973/5155/5175/6383/6441/23539/6520/23657/9056/7057/8793/7422/7441/301/7984/387695/727/857/6367/6352/729230/57126/960/962/972/928/1435/6373/1843/1907/8288/2358/2995/3146/3383/3493/3494/3514/3592/23765/84818/3553/5156…
GO:0051050	BP	GO:0051050	positive regulation of transport	432	0.330704	1.43427	9.999e-05	0.00242704	0.00187151	3005	tags=45%, list=35%, signal=31%	6347/9619/6348/19/9590/1588/1950/2213/58480/5244/358/27113/929/29126/3627/2534/6279/55800/6330/7015/7099/199/10396/558/8938/717/718/720/721/760/784/825/999/8851/1051/1436/6387/26052/1869/1894/2149/2621/2822/3601/3560/3566/3624/3843/6453/3757/4035/4133/5600/4602/22861/10062/5026/5031/5155/5649/6441/6446/10110/6556/6653/6696/54843/7027/7273/7422/7448/7533/26154/9472/288/301/8862/187/7984/408/409/46…
GO:0051056	BP	GO:0051056	regulation of small GTPase mediated signal transduction	167	0.432733	1.82442	9.999e-05	0.00242704	0.00187151	3234	tags=63%, list=37%, signal=40%	19/57514/50650/604/4914/4983/57480/388/58480/2841/9290/4254/23263/8829/57580/23362/117289/2/79658/58504/83478/55701/1894/2057/2149/2203/221472/57493/6453/8997/4233/4853/84033/26030/5649/389/10253/90627/50861/148/84986/395/64333/9828/26084/7984/408/26053/1435/27128/2151/9002/10144/10160/121512/2305/2828/8477/23096/440073/23101/10276/4763/3084/5159/5662/5909/23108/5921/22821/221002/5923/171177/6507…
GO:0051090	BP	GO:0051090	regulation of DNA-binding transcription factor activity	175	0.367058	1.55052	9.999e-05	0.00242704	0.00187151	2823	tags=46%, list=33%, signal=31%	1545/8553/1524/4914/26471/6280/340061/958/1649/2177/5579/121268/6279/7099/306/825/1491/4921/2353/2621/28996/3162/3398/57121/5600/338382/5649/6446/7185/7422/7480/307/367/7984/408/409/655/857/1054/8837/54360/23586/1896/2146/2175/2535/10014/3383/3399/8809/8807/3553/3567/11213/133746/9314/3965/5602/4188/11043/84166/114548/65018/5314/8613/5621/5629/5740/28984/4919/219790/6424/8877/7098/7124/7293/4796/…
GO:0051093	BP	GO:0051093	negative regulation of developmental process	452	0.329249	1.42871	9.999e-05	0.00242704	0.00187151	2828	tags=42%, list=33%, signal=30%	9619/6348/6678/19/604/1524/2213/3690/650/3627/1649/55840/9290/8365/8829/5933/349667/7015/7099/677/94/348110/675/8851/634/1071/1522/54567/26052/1869/1870/1942/2043/2258/2261/10875/2621/3280/3398/3488/3566/3624/3638/81618/3902/3956/4035/4133/5600/407975/4320/4318/58529/54892/4830/10062/115209/4974/5155/90102/10769/10500/8482/6653/6272/6696/10253/90627/8614/55333/7041/7057/22846/7422/7480/7533/6935/…
GO:0051094	BP	GO:0051094	positive regulation of developmental process	666	0.332681	1.45336	9.999e-05	0.00242704	0.00187151	2828	tags=42%, list=33%, signal=31%	57175/7162/6348/1545/8519/347902/604/1524/1950/10855/64332/4914/388/6280/133/358/650/672/1490/29126/958/1052/1116/5168/2113/2534/3559/3678/3655/4254/3872/4436/8829/57580/5579/5270/285590/57698/7015/347733/677/94/100/306/558/718/728/760/825/634/1051/10370/1277/1491/1496/6387/3576/4921/1742/1869/1894/1960/2043/2065/2119/2335/2353/100132074/10468/2621/3280/3082/28996/3162/126393/3398/3486/3566/3624/…
GO:0051129	BP	GO:0051129	negative regulation of cellular component organization	304	0.336274	1.44625	9.999e-05	0.00242704	0.00187151	2826	tags=43%, list=33%, signal=30%	57175/84168/2213/26471/672/3627/1803/2534/2934/4210/8829/349667/1636/94/348110/29028/699/8851/81620/10391/1496/1522/1742/26052/1942/1978/2043/2258/9535/3082/3638/81618/3956/3976/4035/4085/4133/4233/27085/10062/115209/4974/29763/90102/130271/10769/112476/10500/8482/6653/54908/6696/10253/9882/7057/29767/7153/7422/7533/10449/10297/367/395/409/10677/53335/655/9184/822/857/952/8837/1111/23332/23603/23…
GO:0051174	BP	GO:0051174	regulation of phosphorus metabolic process	769	0.32921	1.4414	9.999e-05	0.00242704	0.00187151	2411	tags=38%, list=28%, signal=30%	6347/2013/6348/83666/9590/414062/1524/1950/2213/3690/4914/26471/9088/23682/9467/493/650/1490/9134/958/993/990/1116/63967/3627/54541/5168/2534/9290/83729/3678/3655/4254/8829/54625/5933/6472/7099/1636/94/84632/199/84962/246/641/718/728/1019/8851/634/1163/1436/4921/1742/1844/1848/1894/1942/114794/2043/2065/2149/2203/338557/221472/2258/2261/2335/4616/2621/9535/2822/10457/1839/57493/51191/3280/3082/28…
GO:0051186	BP	GO:0051186	cofactor metabolic process	247	0.357463	1.52888	9.999e-05	0.00242704	0.00187151	2415	tags=40%, list=28%, signal=30%	83666/1645/1646/26471/51268/29968/10157/8644/79094/54541/1719/2534/84706/2941/4837/5091/6472/6999/7298/11332/6296/1109/554235/644/494143/2203/2348/79017/2678/3043/3145/3162/4200/166785/10797/55706/54981/79023/5166/23590/5226/6319/113235/23657/6697/6948/31/23305/84532/55902/191/160428/7915/230/51074/56898/952/27235/51805/1536/1543/84649/1737/50506/387712/8288/10841/2679/2686/51022/10539/27232/2819…
GO:0051241	BP	GO:0051241	negative regulation of multicellular organismal process	593	0.319233	1.39213	9.999e-05	0.00242704	0.00187151	2828	tags=41%, list=33%, signal=30%	5142/6348/5627/6678/604/1524/2213/133/493/650/29126/3627/1649/55840/2841/9290/8365/4210/8829/349667/5270/7015/7099/677/94/100/558/675/784/10203/8851/634/1393/1522/79132/54567/26052/1870/1942/2043/2161/2149/338557/2258/10875/2335/2621/10457/51191/3280/3082/3162/3398/3488/3566/3624/81618/3902/3956/4035/4133/5600/407975/4318/54892/4830/9111/4883/10062/4974/8654/5154/5155/10769/10544/11251/10500/8482…
GO:0051247	BP	GO:0051247	positive regulation of protein metabolic process	722	0.334942	1.46537	9.999e-05	0.00242704	0.00187151	2439	tags=38%, list=28%, signal=30%	6347/2013/9619/84168/6348/83666/9590/604/414062/1524/1950/2213/3690/4914/26471/6280/91947/493/27113/650/672/837/1490/958/990/1116/63967/5168/2534/9290/2934/83729/3678/4254/3872/4210/4582/8829/54625/6279/7099/1636/94/84632/199/84962/246/27018/718/728/825/1019/8851/1163/1436/4921/1742/51514/1848/1894/1942/2043/2065/2161/2149/55215/338557/221472/2258/2261/2335/4616/2621/2822/10457/1839/3280/3082/289…
GO:0051248	BP	GO:0051248	negative regulation of protein metabolic process	433	0.333659	1.44709	9.999e-05	0.00242704	0.00187151	2917	tags=43%, list=34%, signal=30%	871/151636/5627/3690/4983/9467/9806/358/493/56271/672/79094/54541/1719/2534/2537/54625/5272/5270/23145/7099/7298/677/2/25825/27018/718/720/721/825/634/64506/1522/1844/1848/1942/1978/114794/2043/4616/2621/10755/9535/1839/57493/3082/28996/3486/3488/3624/389119/3843/81618/3902/3976/4085/84930/4318/58529/9111/23645/5896/710/6441/153769/6590/9021/6653/10253/80725/55333/7057/7078/54765/51377/7422/11326…
GO:0051249	BP	GO:0051249	regulation of lymphocyte activation	237	0.36667	1.56629	9.999e-05	0.00242704	0.00187151	2917	tags=47%, list=34%, signal=32%	6347/604/2213/11148/64332/29126/958/1803/2177/2534/2934/3109/3115/3559/4436/639/7099/677/100/199/558/923/634/1051/1960/10875/2621/10457/3280/3398/3543/3566/3624/3902/3956/407975/4602/5063/8654/5896/6441/28526/11326/6935/301/384/79915/857/6352/729230/30835/952/970/972/942/1026/1141/11221/1949/2175/2737/3077/3113/3134/3142/3146/3329/3485/3493/3494/3514/3592/3593/3553/51561/3565/3567/3574/3575/3623/…
GO:0051270	BP	GO:0051270	regulation of cellular component movement	505	0.383158	1.66637	9.999e-05	0.00242704	0.00187151	2748	tags=46%, list=32%, signal=33%	6347/57175/2013/5142/6348/1545/8519/6678/9590/604/1524/1588/1950/3690/378938/388/9806/56271/650/284119/29126/958/3627/23604/5168/2113/2841/3678/3655/4254/8829/57580/5270/57698/7015/347733/1636/94/100/199/84962/154810/306/348110/10396/9564/728/999/634/4680/79846/10370/1277/1436/1496/6387/3576/4921/54567/1942/2065/2149/2258/2335/2621/2822/10457/1839/3082/3162/3486/3488/285313/59352/4035/4133/4233/4…
GO:0051271	BP	GO:0051271	negative regulation of cellular component movement	164	0.381707	1.60834	9.999e-05	0.00242704	0.00187151	2748	tags=47%, list=32%, signal=33%	6347/57175/1545/8519/1524/1588/388/2841/8829/94/100/199/348110/999/10370/6387/54567/3162/3486/3488/4035/90102/10500/8482/90627/55333/7049/7057/22846/57406/87/274/727/29775/972/928/23332/23603/1809/1843/11221/2022/83481/2192/10014/3146/3565/182/9314/3868/753/65009/4763/7026/3084/11240/138429/5314/5734/5764/5795/28984/6237/7869/10512/223117/6405/56920/64218/57715/9037/10501/56833/57522/6915/7070/70…
GO:0051272	BP	GO:0051272	positive regulation of cellular component movement	292	0.400959	1.72245	9.999e-05	0.00242704	0.00187151	2828	tags=49%, list=33%, signal=34%	6348/6678/9590/604/1950/3690/378938/388/9806/650/284119/29126/958/3627/23604/5168/2113/3678/3655/4254/8829/57580/57698/7015/347733/199/154810/306/10396/9564/728/4680/79846/1277/1436/6387/3576/4921/2149/2335/2621/2822/10457/1839/3082/3162/3488/59352/4035/4133/4233/4318/5031/5063/5154/5155/5175/10769/5649/389/22800/10500/8482/153769/6546/10253/7057/7422/7448/81029/90/91/9510/301/84913/655/659/857/6…
GO:0051276	BP	GO:0051276	chromosome organization	462	0.341334	1.4814	9.999e-05	0.00242704	0.00187151	1917	tags=34%, list=22%, signal=28%	151636/604/157570/84515/55723/672/83990/9134/8318/990/10036/8208/2177/2669/9837/51659/8365/4173/4174/4436/4582/89797/23397/10360/7703/23649/5579/5888/8438/5933/5983/7015/29028/641/675/699/113130/1017/81620/64946/55839/55166/79682/387103/1107/64858/1763/8110/9156/2237/84296/8330/8334/3015/8349/8520/3070/3976/4085/4172/4175/4176/54069/4602/54892/55706/5111/5422/10714/10721/11107/5557/5558/56852/588…
GO:0051336	BP	GO:0051336	regulation of hydrolase activity	534	0.351764	1.53122	9.999e-05	0.00242704	0.00187151	2467	tags=39%, list=29%, signal=30%	871/6347/84168/6348/4940/5627/54453/57514/604/414062/4914/4983/9088/6280/9806/259173/358/27113/650/837/1490/958/2534/9290/2934/2537/3434/3655/4210/4436/23397/8829/4939/57580/25780/6279/5272/5270/23145/117289/23158/2/9744/84962/79658/58504/83478/27018/718/720/721/728/23234/139818/23348/1894/1942/114794/2043/2149/221472/2261/2335/2621/2822/3082/3486/3843/128239/8997/4035/4133/84930/4318/58529/22861…
GO:0051338	BP	GO:0051338	regulation of transferase activity	423	0.345603	1.49803	9.999e-05	0.00242704	0.00187151	3143	tags=49%, list=36%, signal=33%	2013/151636/1950/3690/4914/9088/9467/91947/493/650/9134/958/993/990/1116/63967/3627/2534/4254/5933/5983/7099/1636/84632/84962/641/728/1019/8851/634/1163/1436/4921/1742/1844/1848/1894/1942/2043/2065/2149/221472/2258/2261/4616/2621/9535/57493/51191/3082/389119/3843/128239/6453/4085/5600/22924/84930/54892/5063/8654/5154/5155/113791/5649/5982/5984/5985/6556/9021/6653/10253/80725/7057/9966/7273/7422/7…
GO:0051345	BP	GO:0051345	positive regulation of hydrolase activity	327	0.352882	1.52065	9.999e-05	0.00242704	0.00187151	3376	tags=54%, list=39%, signal=34%	6347/84168/6348/54453/57514/414062/4914/4983/6280/259173/27113/650/837/1490/958/2534/9290/2934/3655/4210/4436/23397/8829/57580/25780/6279/117289/23158/9744/79658/58504/83478/27018/728/23234/139818/23348/1894/1942/2043/2149/2261/2335/2822/8997/22861/10062/5031/5111/23645/10213/10235/9628/389/90627/374403/9882/8743/9966/29128/7422/55803/577/141/148/10598/10297/84986/395/64333/7984/408/55616/10018/6…
GO:0051347	BP	GO:0051347	positive regulation of transferase activity	306	0.350755	1.50878	9.999e-05	0.00242704	0.00187151	3143	tags=50%, list=36%, signal=33%	2013/151636/1950/3690/4914/91947/493/650/958/990/1116/63967/2534/4254/5983/7099/1636/84632/84962/728/8851/1163/1436/4921/1742/1848/1894/1942/2043/2065/2149/221472/2258/2261/4616/2621/3082/128239/6453/5600/22924/84930/54892/5063/8654/5154/5155/5649/5982/5984/5985/6556/6653/10253/80725/7057/9966/7422/7436/93/148/389658/7984/408/627/79866/727/8536/29775/55704/6352/3491/10576/972/8555/983/1026/1164/1…
GO:0051493	BP	GO:0051493	regulation of cytoskeleton organization	239	0.356479	1.52332	9.999e-05	0.00242704	0.00187151	2712	tags=43%, list=31%, signal=30%	57175/388/58480/6280/672/1490/10602/342184/6624/2934/8829/57580/6279/285590/11346/246/348110/8851/100653515/10391/23406/1436/1496/6387/1894/2258/9535/4035/4133/22924/4233/4853/5063/5154/23187/90102/130271/10769/10733/25886/389/220134/50861/171024/29767/8936/10297/395/7984/55616/10677/274/79866/822/824/827/55704/11135/148170/55835/79959/1111/23332/11064/2017/23191/2288/8477/3383/133746/4130/10787/…
GO:0051674	BP	GO:0051674	localization of cell	796	0.344345	1.50789	9.999e-05	0.00242704	0.00187151	2892	tags=43%, list=34%, signal=32%	6347/57175/2013/5142/6348/1545/8519/83666/5627/6678/9590/414062/1524/1588/1950/3690/3914/378938/4983/388/6280/8140/23428/9806/493/56271/650/284119/1490/29126/958/3627/2920/23604/54541/1803/5168/2113/6624/2534/2841/3678/3655/4254/8829/57580/11156/6279/6402/5270/57698/7015/54210/347733/1636/94/100/30817/199/84962/154810/306/348110/10396/558/9564/728/999/8851/634/4680/79846/10370/1277/1436/1496/6387…
GO:0051707	BP	GO:0051707	response to other organism	436	0.379791	1.64705	9.999e-05	0.00242704	0.00187151	2817	tags=46%, list=33%, signal=32%	6347/3437/5142/6348/151636/8519/4940/83666/6678/19/9590/968/1524/55601/2213/4600/6280/340061/133/650/929/29126/958/3627/2920/54541/115361/55008/2537/3434/3559/3665/4360/4939/91543/64108/6279/5272/7099/306/164668/445/558/116071/55509/718/721/728/923/1019/1051/5199/23406/1439/6387/3576/79132/2149/10875/2353/2634/2678/8349/51191/3429/10964/3433/24138/10410/3543/3566/3669/23658/5600/4502/4599/22861/1…
GO:0051726	BP	GO:0051726	regulation of cell cycle	509	0.351328	1.52822	9.999e-05	0.00242704	0.00187151	1918	tags=35%, list=22%, signal=29%	6347/604/1950/4600/26471/9768/9088/388/493/650/672/83990/1490/9134/993/8318/990/63967/1649/4436/4582/4998/7703/5888/5933/6241/7015/677/84632/199/440/641/675/699/168448/113130/5129/1017/1019/8851/81620/100653515/10370/1163/3576/64858/220042/1763/51514/1869/1870/1894/1978/146956/2237/4616/2621/10755/10457/51191/3280/28996/3398/3624/3843/3976/4085/22924/84930/27085/4605/4853/5111/5155/23481/10769/10…
GO:0052547	BP	GO:0052547	regulation of peptidase activity	195	0.381948	1.62007	9.999e-05	0.00242704	0.00187151	1945	tags=37%, list=23%, signal=30%	871/84168/5627/6280/9806/358/27113/837/1490/2534/2934/2537/4210/6279/5272/5270/23145/2/27018/718/720/721/1942/2043/2149/2335/2621/3082/4318/22861/10213/5896/710/6590/6653/7057/7078/8743/9966/51377/7422/7448/3730/408/409/10018/274/332/727/838/857/3491/135228/960/1032/8837/340267/286204/1512/54205/112399/2152/2192/2852/2896/3092/3146/3329/3336/3700/9314/27074/3965
GO:0052548	BP	GO:0052548	regulation of endopeptidase activity	182	0.375207	1.58699	9.999e-05	0.00242704	0.00187151	1945	tags=37%, list=23%, signal=29%	871/5627/6280/9806/358/27113/837/1490/2534/2934/2537/4210/6279/5272/5270/2/27018/718/720/721/1942/2043/2149/2621/3082/4318/22861/10213/5896/710/6590/6653/7057/7078/8743/9966/51377/7422/7448/3730/408/409/10018/274/332/727/838/3491/135228/960/1032/8837/340267/286204/1512/54205/112399/2152/2852/3092/3146/3329/3336/3700/9314/27074/3965
GO:0060089	MF	GO:0060089	molecular transducer activity	567	0.33103	1.44258	9.999e-05	0.00242704	0.00187151	3065	tags=47%, list=36%, signal=32%	84168/5157/19/1952/1524/1950/2213/132014/3690/4914/929/958/2564/27239/2841/2857/9290/8111/3119/3122/3597/3559/3872/4360/4886/8829/93035/349667/7099/54210/79865/94/30817/290/558/728/10203/919/5129/1017/1019/1436/1439/10800/4921/2043/2057/2065/2149/9103/338557/2261/2348/2565/2570/387509/2894/3117/3601/3560/3563/3566/3696/3902/59352/57121/4035/4233/5819/4853/4883/10062/2494/5026/5031/10544/11251/579…
GO:0060326	BP	GO:0060326	cell chemotaxis	161	0.388506	1.63614	9.999e-05	0.00242704	0.00187151	1866	tags=36%, list=22%, signal=29%	6347/57175/5142/6348/414062/1524/1588/6280/3627/2920/23604/2841/8829/57580/6279/30817/199/9564/728/6387/3576/1960/2621/1839/3082/4233/5155/5872/6441/7057/7422/301/7984/409/387695/727/6367/6352/729230/972/1435/6373/9732/1843/1907/1969/2246/8817/2358/2549/3146/3592/23765/84818/3553/51561/3672/120425
GO:0060548	BP	GO:0060548	negative regulation of cell death	402	0.348003	1.50644	9.999e-05	0.00242704	0.00187151	1828	tags=33%, list=21%, signal=28%	6347/3437/1831/347902/604/1524/4914/26471/358/672/1490/2534/2537/3665/3678/3655/4254/4436/4582/8829/7703/5272/7015/100/199/79658/440/558/597/27018/728/27101/825/4680/1051/10370/1436/1491/6387/220042/1942/1960/2065/2149/338557/2621/10457/3082/28996/3162/126393/3560/6453/4035/4085/4233/407975/4318/4853/1728/5166/10769/56852/5896/255488/153769/23657/9021/6653/10253/7057/8793/8743/7374/7422/7516/1044…
GO:0060627	BP	GO:0060627	regulation of vesicle-mediated transport	216	0.372986	1.58891	9.999e-05	0.00242704	0.00187151	2886	tags=48%, list=33%, signal=33%	6347/1950/2213/3690/4983/929/8829/5579/30817/246/558/23621/8938/717/718/720/721/634/1742/8448/2621/10755/3162/3601/3560/3566/3638/6453/4035/4133/10062/29763/91461/112476/5414/6441/6556/6653/85439/55333/9882/7422/7448/148/301/8862/408/409/274/8618/857/729230/57126/8973/1141/23332/1268/1601/22943/1815/2358/2619/2901/9001/3077/3092/3134/3146/3553/3561/3565/3745/3965/55646/65009/5023/27445/65018/8398…
GO:0062023	CC	GO:0062023	collagen-containing extracellular matrix	228	0.354834	1.51411	9.999e-05	0.00242704	0.00187151	1945	tags=34%, list=23%, signal=27%	2162/3959/871/6678/3914/6280/1490/1291/83729/3655/89797/6279/5272/5270/2/5199/1307/1277/85301/1299/1522/6387/51162/2161/10875/2335/3490/3956/4318/5046/5155/6383/8482/710/6590/8406/7041/7045/7052/7057/7078/7448/81029/27299/9510/81794/54507/165/301/307/655/284018/3491/1690/1303/7373/81578/340267/1289/1512/1520/2202/2152/2192/10516/2200/2201/2331/388697/5654/3383/3574/50939/3700/3913/3918/3965
GO:0070161	CC	GO:0070161	anchoring junction	270	0.354918	1.52232	9.999e-05	0.00242704	0.00187151	2533	tags=41%, list=29%, signal=30%	57175/23150/8496/23336/9590/57514/3690/388/58480/5244/726/1803/342184/2934/3678/3655/8516/3801/8829/8470/165904/84962/58504/83478/9564/999/634/10391/1496/1500/4921/2037/2043/2261/3696/54800/4035/143098/5819/90102/10544/22800/171024/7041/7052/9414/64759/7422/8936/87/83543/301/55616/659/824/857/960/928/11135/1013/1041/10518/23332/23603/8895/1466/2017/23191/1601/1674/2022/1969/54751/10979/2274/23769…
GO:0070372	BP	GO:0070372	regulation of ERK1 and ERK2 cascade	145	0.427455	1.79049	9.999e-05	0.00242704	0.00187151	2339	tags=47%, list=27%, signal=35%	6347/6348/9590/414062/4914/650/1490/1116/9290/8829/7099/246/728/634/1436/1848/2149/338557/2261/2335/2621/10457/3976/4035/4853/5031/5154/5155/8482/10253/55333/7078/148/389658/51074/408/409/6367/6352/3491/960/972/8837/1843/11221/1969/2192/8817/2264/2322/2358/64762/152007/2852/3146/3383/3553/9314/3965/8685/65009/171389/255743/56034/80310/5159/5245/5314
GO:0070661	BP	GO:0070661	leukocyte proliferation	146	0.390836	1.63745	9.999e-05	0.00242704	0.00187151	2910	tags=51%, list=34%, signal=34%	604/2213/11148/29126/958/2534/3109/3115/3559/4254/7099/1636/100/199/923/1051/1436/1503/5169/10457/3070/3280/4883/128506/8654/6441/6556/11326/301/384/79915/11119/6352/729230/4064/30835/952/970/972/942/1026/1141/1380/1435/2322/3113/3146/3329/3485/3592/3593/3553/51561/3565/3567/3574/3575/3718/3965/5074/23228/5621/5788/6304/6385/7037/27242/7293/944/8744/54209/7412/64115/7535
GO:0070848	BP	GO:0070848	response to growth factor	322	0.34467	1.48467	9.999e-05	0.00242704	0.00187151	1908	tags=34%, list=22%, signal=28%	6347/57175/26509/6678/1524/3690/4914/650/1490/57530/54541/2534/3678/8516/8829/5579/11156/677/94/306/9564/10370/1277/3576/54567/1841/1848/1869/1960/79633/2261/2348/2353/10468/2621/10755/64388/3280/3082/28996/4036/4176/407975/5046/5155/6653/6272/10253/7041/7049/7057/7422/7448/8936/6935/90/91/92/93/11173/9719/3730/301/8862/409/25805/283149/627/632/655/659/857/6352/3491/135228/960/1028/8837/8895/2862…
GO:0071103	BP	GO:0071103	DNA conformation change	137	0.538017	2.24764	9.999e-05	0.00242704	0.00187151	1757	tags=53%, list=20%, signal=43%	84515/55723/83990/8318/10036/8208/9837/51659/8365/4173/4174/89797/23397/5888/8438/5983/641/113130/64946/55839/55166/79682/387103/1107/1763/84296/8349/8520/3070/4172/4175/4176/54069/54892/10721/56852/9401/5982/5984/5985/10592/7153/7273/301/983/1058/2491/64105/91687/79019/79172/201254/165545/79075/54821/10595/2852/3005/8348/440689/8347/3017/8357/126961/333932/8353/121504/8370/8366/3159/8091/3146
GO:0071345	BP	GO:0071345	cellular response to cytokine stimulus	530	0.366068	1.59323	9.999e-05	0.00242704	0.00187151	1871	tags=34%, list=22%, signal=28%	2162/6347/3437/6348/8519/4940/83666/9590/604/414062/1524/132014/4600/58480/9806/672/837/958/1052/1116/4261/3627/2920/6624/2534/115361/2934/3115/3119/3122/3127/2537/3434/3597/3559/3665/4360/4582/4939/54625/11156/91543/6775/7099/677/199/246/445/558/27101/1019/634/1051/1277/153222/1393/1436/1439/1491/6387/3576/2057/2335/2353/2621/2634/10755/64388/3082/3117/3162/3429/3433/10410/3601/3560/3563/3566/36…
GO:0071363	BP	GO:0071363	cellular response to growth factor stimulus	308	0.350762	1.50889	9.999e-05	0.00242704	0.00187151	1908	tags=35%, list=22%, signal=28%	6347/57175/26509/6678/1524/3690/4914/650/1490/57530/54541/2534/3678/8516/8829/5579/11156/677/94/9564/10370/1277/3576/54567/1841/1869/1960/79633/2261/2348/2353/10468/2621/10755/64388/3280/3082/28996/4036/4176/407975/5046/5155/6653/6272/10253/7041/7049/7057/7422/7448/8936/6935/90/91/92/93/11173/9719/3730/301/8862/409/25805/283149/627/632/655/659/857/6352/3491/135228/960/1028/8837/8895/286204/23191/…
GO:0071407	BP	GO:0071407	cellular response to organic cyclic compound	231	0.373897	1.59612	9.999e-05	0.00242704	0.00187151	2954	tags=48%, list=34%, signal=32%	6347/5142/6348/1545/19/340061/5244/8644/358/493/650/672/54541/114907/3434/3655/5888/6472/677/199/445/478/641/999/1019/1051/1277/153222/1393/1978/2348/2822/3015/3488/3624/3638/3956/10062/2494/5031/5063/5106/5155/6097/6546/6696/7041/55151/7480/7533/9472/301/367/409/468/10018/632/655/57658/857/6352/1050/8837/10518/1543/1601/23586/2146/2274/2288/2322/27086/54331/2819/2852/3157/3383/3399/64135/3553/93…
GO:0071495	BP	GO:0071495	cellular response to endogenous stimulus	585	0.331506	1.44536	9.999e-05	0.00242704	0.00187151	2917	tags=43%, list=34%, signal=31%	6347/57175/5142/1645/1646/1524/2213/4914/8644/358/493/650/672/83990/837/1490/990/57530/1291/54541/114907/2534/8516/5579/5888/6472/7099/677/94/199/1109/440/445/478/23621/9564/641/760/773/999/1019/8851/634/1051/10370/1307/1277/64506/153222/1393/3576/1583/54567/1869/1960/1978/146956/2043/79633/2261/2348/2353/100132074/10468/10755/2822/64388/3015/3280/28996/3488/3490/3624/3843/4035/4036/4176/407975/1…
GO:0071900	BP	GO:0071900	regulation of protein serine/threonine kinase activity	228	0.366089	1.56214	9.999e-05	0.00242704	0.00187151	2819	tags=47%, list=33%, signal=32%	1950/4914/9088/493/650/9134/958/993/990/4254/7099/84962/641/728/1019/8851/1163/1436/1844/1848/2043/2149/221472/4616/57493/51191/3082/389119/3843/128239/5600/22924/5063/8654/5154/5155/6653/10253/7057/7422/7984/408/655/727/8536/857/901/79616/81669/972/995/983/1026/1028/1032/1050/1164/10926/22943/1815/1843/11221/1849/10595/2146/2246/8817/2322/2357/2690/124790/8091/3553/388324/11213/345611/3672/5606/…
GO:0072358	BP	GO:0072358	cardiovascular system development	361	0.370161	1.59873	9.999e-05	0.00242704	0.00187151	2791	tags=45%, list=32%, signal=32%	6347/2013/84168/1545/6678/1524/79659/1950/2034/10855/3690/388/133/358/672/1490/958/23670/1116/3627/1649/5168/2113/3678/8829/639/5579/7015/677/94/154810/290/306/58504/83478/718/728/10203/634/1277/1491/3576/54567/1870/1942/51162/1960/2335/2348/2822/10457/57493/3280/3082/28996/3162/126393/3696/3976/4035/4036/4897/5154/5155/5175/10769/54538/9021/10253/90627/55333/7045/7049/7057/22846/7422/59/90/93/80…
GO:0072359	BP	GO:0072359	circulatory system development	513	0.354681	1.54277	9.999e-05	0.00242704	0.00187151	2801	tags=44%, list=32%, signal=31%	6347/2013/84168/1545/6678/1524/79659/1950/2034/10855/3690/4606/388/133/358/650/672/1490/958/23670/1116/3627/1649/9249/5168/2113/3678/4886/8829/639/5579/285590/8470/7015/677/94/154810/290/306/58504/83478/718/728/27101/10203/634/10370/1277/1491/3576/54567/1848/1870/1942/51162/1960/2057/2065/79633/2335/2348/2822/10457/57493/3280/3082/28996/3162/126393/3398/3696/3976/4035/4036/5600/4151/407975/10529/…
GO:0080134	BP	GO:0080134	regulation of response to stress	675	0.3236	1.41418	9.999e-05	0.00242704	0.00187151	2911	tags=41%, list=34%, signal=30%	3075/6348/151636/83666/5627/80216/604/414062/1588/55601/2213/10855/64332/26471/6280/340061/493/650/672/1490/929/1649/1719/2113/2187/2177/2534/3434/3559/3665/4210/11343/4582/54625/5888/5933/91543/6279/5272/5270/7015/7099/79865/2/100/84962/79000/716/717/718/720/721/728/10203/825/923/634/1051/5199/10391/1393/6387/220042/79132/5169/2043/2161/2149/338557/221472/10875/4616/2678/1839/51191/3082/28996/36…
GO:0090068	BP	GO:0090068	positive regulation of cell cycle process	129	0.41936	1.74638	9.999e-05	0.00242704	0.00187151	1874	tags=41%, list=22%, signal=33%	1950/672/1490/993/8318/990/4582/7015/199/168448/113130/1017/1019/8851/81620/51514/1869/1894/2237/10755/3398/4085/27085/5111/5155/10769/10733/25886/84440/5889/7027/7480/9510/301/79915/685/7832/8555/995/983/1026/55835/1543/10926/79733/9700/2146/26271/2735/8091/3306/3553/3741
GO:0097190	BP	GO:0097190	apoptotic signaling pathway	264	0.396504	1.69901	9.999e-05	0.00242704	0.00187151	1945	tags=40%, list=23%, signal=32%	1545/1524/26471/6280/27113/672/837/929/79094/23604/1649/54541/2534/2934/2537/3655/4254/4436/4582/8829/7703/6279/7015/7099/597/27018/90427/675/1051/1491/6387/220042/1869/1870/2065/2261/50486/79017/3082/28996/3162/3429/3624/81618/4055/9833/4318/23645/5625/5414/81537/10572/6272/8406/7027/7057/7078/8743/7185/7533/10449/90/91/64782/367/409/79915/468/10018/602/627/838/857/952/960/970/972/1026/1032/8837…
GO:0097435	BP	GO:0097435	supramolecular fiber organization	311	0.342544	1.47378	9.999e-05	0.00242704	0.00187151	2479	tags=39%, list=29%, signal=29%	871/57175/2013/1545/4606/388/58480/1490/10602/342184/6624/2934/3872/8829/57580/285590/57698/8470/11346/165904/199/246/348110/9564/825/8851/1277/10391/23406/1496/6387/4921/2258/9535/347240/54800/4133/22924/4233/4320/58529/10529/84033/5063/90102/130271/389/201191/50861/171024/7062/29767/7273/8936/87/165/83543/10297/395/7984/408/55616/10677/274/822/55704/11135/148170/55835/8837/9793/23332/1303/7373/…
GO:0098542	BP	GO:0098542	defense response to other organism	226	0.414939	1.77011	9.999e-05	0.00242704	0.00187151	1847	tags=38%, list=21%, signal=31%	3437/151636/8519/4940/83666/55601/4600/6280/340061/958/3627/54541/115361/2537/3434/3559/3665/4939/91543/64108/6279/7099/306/164668/116071/728/1051/5199/23406/79132/10875/2634/8349/51191/3429/10964/3433/24138/10410/3543/3566/3669/4599/22861/4938/10622/51728/5551/6441/6556/6590/6773/7100/28526/54765/140564/60489/384/602/387695/50489/1053/1690/23586/1672/1969/8288/27086/2358/163351/2896/8347/3240/56…
GO:0098552	CC	GO:0098552	side of membrane	276	0.36958	1.58634	9.999e-05	0.00242704	0.00187151	1875	tags=35%, list=22%, signal=28%	2217/9619/84168/19/1524/2213/11148/929/29126/958/3627/2534/2669/3115/3119/3122/3127/3597/3559/3678/3655/349667/5270/7099/1636/100/246/290/54718/785/923/999/6387/1742/5169/343413/2348/57493/3117/3543/3560/3563/3902/4036/4897/5175/8482/7049/7057/28526/286/118429/301/11119/10384/824/729230/9332/911/30835/10666/972/942/925/928/1141/1917/2022/2152/10160/10979/2675/2690/2769/2774/2791/55970/54331/2788/…
GO:0098588	CC	GO:0098588	bounding membrane of organelle	781	0.30178	1.32142	9.999e-05	0.00242704	0.00187151	2884	tags=40%, list=33%, signal=29%	2013/9619/84168/151636/2212/5627/6678/968/9435/92126/1950/10855/3690/4914/9088/23682/388/58480/340061/440279/929/29126/1291/9249/1803/11226/115361/3109/3115/3119/3122/3127/3665/4360/375775/91543/80183/6402/7099/54972/10090/9744/290/306/445/10396/8704/23621/8938/597/90427/8927/728/634/4680/51363/55790/1522/1742/8448/2043/221472/2348/2523/2528/2634/59345/2822/10457/1839/3108/3117/3429/10410/3601/81…
GO:0098609	BP	GO:0098609	cell-cell adhesion	461	0.336399	1.46005	9.999e-05	0.00242704	0.00187151	2410	tags=39%, list=28%, signal=29%	6347/1545/347902/604/1952/1524/2213/11148/3690/64332/6280/650/29126/1803/2113/2534/3109/3115/3559/3678/3655/8516/3801/6279/6402/5270/677/100/199/84962/246/306/445/923/999/8851/634/4680/1051/10370/9069/23562/1496/1500/6387/1742/1960/79633/10875/2621/10457/3043/3280/7087/3566/3679/84623/3902/3956/266727/4602/5819/4897/5063/51294/56123/56128/26025/56097/8654/5175/5792/5896/54538/6441/6614/23657/5533…
GO:0098687	CC	GO:0098687	chromosomal region	161	0.447847	1.88604	9.999e-05	0.00242704	0.00187151	2733	tags=56%, list=32%, signal=39%	157570/8365/4173/4174/4436/4998/5888/7015/641/675/699/113130/1017/81620/1051/64946/55839/55166/79682/387103/64858/1763/2237/8520/3070/4085/4172/4175/4176/54069/27085/79023/5111/9401/220134/54908/6839/55055/11130/10189/332/9184/23468/55143/983/1058/2491/64105/91687/79019/79172/201254/1111/9793/23332/11144/79075/79980/6990/54821/2146/121504/8370/8366/23421/3835/11004/90417/9735/4171/79035/23310/641…
GO:0098772	MF	GO:0098772	molecular function regulator	738	0.342178	1.4975	9.999e-05	0.00242704	0.00187151	2900	tags=43%, list=34%, signal=32%	871/6347/3790/6348/151636/83666/5627/54453/57514/50650/414062/1950/26471/4983/57480/9467/9806/133/259173/493/650/1490/9134/3627/2920/6764/2669/83729/4254/23263/23397/8829/57580/5579/23362/25780/6236/55800/6330/5272/5270/285590/23145/117289/23158/2/9744/51816/84632/306/79658/58504/83478/55701/27018/718/720/721/784/825/1019/8851/1163/6387/3576/139818/23348/1894/114794/2065/221472/2258/2335/10468/26…
GO:0098797	CC	GO:0098797	plasma membrane protein complex	330	0.358677	1.54596	9.999e-05	0.00242704	0.00187151	1887	tags=35%, list=22%, signal=28%	3790/5142/3690/6329/8140/650/958/3109/3115/3119/3122/3127/3597/3559/3678/3655/8516/55800/6330/6335/94/478/773/55799/784/785/10203/919/923/999/634/1439/1500/1742/2700/3108/3117/3560/3679/3696/3757/9132/56479/4035/143098/6520/55333/7049/28526/7448/57406/90/91/92/93/10297/727/93589/57828/972/925/1013/8837/8973/1141/26047/23603/2017/1536/50506/5348/9568/2702/2707/349149/2769/2774/2791/55970/54331/278…
GO:0098805	CC	GO:0098805	whole membrane	673	0.313033	1.36794	9.999e-05	0.00242704	0.00187151	2971	tags=42%, list=34%, signal=30%	871/2013/84168/151636/2212/26509/6678/19/968/1950/10855/3690/4914/23682/388/340061/440279/5244/493/284119/929/29126/1291/1803/2534/3109/3115/3119/3122/3127/3665/4360/375775/91543/349667/80183/6402/7099/9744/290/306/445/10396/23621/8938/597/90427/8927/728/8436/999/634/4680/1742/8448/2043/2149/221472/2348/59345/2822/10457/1839/3108/3117/3162/3429/10410/81618/11015/4035/4036/4830/4973/5175/51365/510…
GO:0099080	CC	GO:0099080	supramolecular complex	415	0.334166	1.44767	9.999e-05	0.00242704	0.00187151	2898	tags=44%, list=34%, signal=31%	57175/5142/23336/79659/4606/7280/493/56271/1291/114907/342184/2534/23046/3801/3872/4210/8829/57326/55800/57698/8470/11346/347733/51175/113146/199/825/8851/7461/1277/85301/23406/1393/26052/92235/2258/347240/338785/144501/3887/3892/4133/9053/22924/57644/58529/10529/4830/84033/5175/283726/6344/220134/6546/10253/171024/29767/7273/203068/59/87/81794/148/83543/286/288/301/10297/395/9532/274/332/800/827…
GO:0099081	CC	GO:0099081	supramolecular polymer	415	0.334166	1.44767	9.999e-05	0.00242704	0.00187151	2898	tags=44%, list=34%, signal=31%	57175/5142/23336/79659/4606/7280/493/56271/1291/114907/342184/2534/23046/3801/3872/4210/8829/57326/55800/57698/8470/11346/347733/51175/113146/199/825/8851/7461/1277/85301/23406/1393/26052/92235/2258/347240/338785/144501/3887/3892/4133/9053/22924/57644/58529/10529/4830/84033/5175/283726/6344/220134/6546/10253/171024/29767/7273/203068/59/87/81794/148/83543/286/288/301/10297/395/9532/274/332/800/827…
GO:0099503	CC	GO:0099503	secretory vesicle	444	0.362683	1.57336	9.999e-05	0.00242704	0.00187151	2748	tags=44%, list=32%, signal=32%	2162/3959/5142/2212/5627/6414/6678/272/968/1950/10855/3690/6280/340061/440279/929/1116/2934/6279/6402/5270/2/51816/10566/290/306/10396/23621/25825/90427/675/8927/718/728/634/4680/5199/1277/23406/1393/1522/1742/8448/283849/10875/2335/2617/2621/10755/9535/3043/3082/4035/25840/4318/4521/4973/5154/5155/5175/51365/112476/10213/25797/5872/8635/5414/710/27180/6556/6518/6590/29887/85439/8676/54843/374403…
GO:0099512	CC	GO:0099512	supramolecular fiber	414	0.335169	1.45194	9.999e-05	0.00242704	0.00187151	2898	tags=44%, list=34%, signal=31%	57175/5142/23336/79659/4606/7280/493/56271/1291/114907/342184/2534/23046/3801/3872/4210/8829/57326/55800/57698/8470/11346/347733/51175/113146/199/825/8851/7461/1277/85301/23406/1393/26052/92235/2258/347240/338785/144501/3887/3892/4133/9053/22924/57644/58529/10529/4830/84033/5175/283726/6344/220134/6546/10253/171024/29767/7273/203068/59/87/81794/148/83543/286/288/301/10297/395/9532/274/332/800/827…
GO:1901214	BP	GO:1901214	regulation of neuron death	146	0.400287	1.67705	9.999e-05	0.00242704	0.00187151	1282	tags=31%, list=15%, signal=27%	6347/6348/1524/2213/4914/26471/1649/54541/2534/4436/8829/7015/7099/558/23621/728/8851/1051/1522/2065/2149/2353/10457/28996/3162/6453/4035/4602/4605/1728/5063/22800/10280/23657/6653/7516/408/409/468/10018/627/80823/7832/824/6352
GO:1901342	BP	GO:1901342	regulation of vasculature development	181	0.404945	1.71222	9.999e-05	0.00242704	0.00187151	1908	tags=39%, list=22%, signal=31%	2013/1545/6678/1524/388/133/358/672/958/23670/1116/3627/5168/2113/3678/8829/5579/7015/94/306/718/728/634/1491/3576/54567/1870/1942/10457/3082/28996/3162/126393/3696/5155/10769/10253/90627/55333/7057/22846/7422/8038/577/79924/51129/301/187/655/694/29775/729230/8837/1512/1536/2022/1969/2152/2246/8817/2549/2852/2828/2896/10014/3099/8091/3553/140862/57608/9314
GO:1901698	BP	GO:1901698	response to nitrogen compound	429	0.348269	1.51018	9.999e-05	0.00242704	0.00187151	2877	tags=44%, list=33%, signal=31%	5142/6678/19/968/2213/340061/133/358/493/672/83990/837/1490/990/1291/1719/2534/2934/3434/4837/5579/5888/6472/6775/6999/7099/7298/677/100/199/440/445/478/23621/9564/641/728/760/773/27101/999/1017/1019/8851/634/1051/1307/1277/64506/1393/6387/1583/1959/1978/2043/2348/2353/100132074/2822/3488/3843/4035/4318/22861/4830/1728/5026/5031/5106/5111/5166/5872/143686/6520/6546/9021/6653/6272/6773/8614/9882/7…
GO:1901700	BP	GO:1901700	response to oxygen-containing compound	697	0.361961	1.58258	9.999e-05	0.00242704	0.00187151	2467	tags=41%, list=29%, signal=32%	6347/5142/6348/1545/6678/19/9590/1645/1646/968/1524/2213/4914/388/5244/133/8644/358/493/672/83990/837/1490/929/29126/990/1291/3627/2920/54541/1719/2113/114907/2534/2934/4360/7703/5579/5888/6279/6472/6775/6999/7099/7298/677/100/199/1109/360/440/445/478/558/23621/8938/9564/641/728/760/768/773/27101/10203/923/999/1017/1019/8851/81620/634/1051/1307/1277/64506/1393/1439/6387/3576/1583/1869/1894/1959/1…
GO:1901701	BP	GO:1901701	cellular response to oxygen-containing compound	489	0.356958	1.55108	9.999e-05	0.00242704	0.00187151	3110	tags=49%, list=36%, signal=33%	6347/5142/6348/1545/19/1645/1646/968/1524/2213/388/5244/8644/358/493/672/83990/837/929/29126/990/1291/3627/2920/54541/1719/2113/114907/2534/4360/7703/5579/5888/6472/7099/677/199/1109/445/478/558/23621/8938/9564/641/760/773/10203/923/999/1017/1019/8851/634/1051/1307/1277/64506/1393/3576/1583/1869/1894/1978/2043/2348/2353/100132074/2621/2822/3015/3082/3488/3624/3638/3843/3956/4035/4233/4318/4602/48…
GO:1901987	BP	GO:1901987	regulation of cell cycle phase transition	206	0.382329	1.6254	9.999e-05	0.00242704	0.00187151	1918	tags=39%, list=22%, signal=31%	6347/493/672/993/8318/990/63967/4582/4998/5933/7015/677/199/641/699/168448/113130/1017/1019/81620/51514/1869/10457/3398/4085/27085/5111/10769/10733/10213/5889/54908/7027/90381/203068/10537/7480/9510/301/79915/84446/7832/9184/387695/8555/995/983/1021/1026/1028/1032/55835/22995/79959/1111/9793/23332/11064/10106/10217/1543/10926/29980/1843/79733/9700/2146/26271/2735/29933/115106/55142/54801/55559/93…
GO:1901990	BP	GO:1901990	regulation of mitotic cell cycle phase transition	193	0.382106	1.62006	9.999e-05	0.00242704	0.00187151	1918	tags=39%, list=22%, signal=31%	6347/672/993/8318/990/63967/4582/4998/5933/7015/677/199/641/699/168448/113130/1017/1019/81620/51514/1869/10457/3398/4085/27085/5111/10769/10733/10213/5889/54908/7027/90381/203068/10537/7480/9510/301/79915/84446/7832/9184/8555/995/983/1021/1026/1028/1032/55835/22995/79959/9793/23332/11064/10106/10217/1543/29980/1843/79733/9700/2146/26271/29933/115106/55142/54801/55559/93323/8091/3306/3741/9314/9735
GO:1902105	BP	GO:1902105	regulation of leukocyte differentiation	151	0.417221	1.75125	9.999e-05	0.00242704	0.00187151	2917	tags=54%, list=34%, signal=36%	6348/604/2213/64332/2177/9290/3559/3665/4254/639/7099/677/100/558/760/634/1051/1960/10875/2353/2621/3398/3566/3624/3902/3976/407975/4602/4830/4853/128506/5896/6935/301/632/729230/972/942/1021/51208/1435/11221/2124/2175/2200/27086/10272/2737/3142/3146/3592/3593/51561/3565/3567/3574/3575/3623/3662/3718/3965/10234/9935/4323/4763/114548/5788/4920/56833/57864/8651/9840/7098/7124/8744/9760/54209/10221/…
GO:1902533	BP	GO:1902533	positive regulation of intracellular signal transduction	477	0.381286	1.65593	9.999e-05	0.00242704	0.00187151	2513	tags=43%, list=29%, signal=32%	6347/6348/1545/83666/9590/1646/80216/414062/1524/55601/1950/2213/10855/4914/26471/6280/8644/27113/650/1490/929/958/1116/1649/2534/2841/9290/4254/8829/54625/5579/11156/6279/7099/100/84962/246/558/90427/728/1436/1491/79132/1848/1894/1942/2043/2057/2065/2149/338557/221472/2261/4616/2621/10457/1839/3280/3082/28996/3162/24138/3486/3487/3488/128239/6453/3956/3976/4035/4055/5600/4233/4853/5026/5031/5063…
GO:1903037	BP	GO:1903037	regulation of leukocyte cell-cell adhesion	168	0.393049	1.65786	9.999e-05	0.00242704	0.00187151	2910	tags=51%, list=34%, signal=34%	6347/604/2213/11148/64332/29126/1803/2113/2534/3109/3115/3559/100/199/445/923/634/1051/6387/1960/10875/10457/3280/3566/3902/3956/4602/5063/8654/5896/6441/11326/301/384/857/6352/729230/30835/960/970/972/942/11221/1949/2737/3077/3113/3142/3146/3329/3383/3485/3592/3593/3553/51561/3565/3574/3575/3718/9314/3965/10725/114548/8013/5058/5074/5621/5724/5788/6385/140885/10326/8651/9840/7037/7070/201633/712…
GO:1903047	BP	GO:1903047	mitotic cell cycle process	393	0.401619	1.73761	9.999e-05	0.00242704	0.00187151	2917	tags=51%, list=34%, signal=35%	6347/604/1950/84515/9088/388/58480/672/9134/993/8318/990/63967/1719/9837/55388/4173/4174/4436/4582/23397/4998/23594/22822/23649/5579/5888/5933/6241/7015/7298/677/81569/199/84962/586/641/675/699/168448/113130/1017/1019/81620/64858/1763/51514/1869/1894/1978/146956/10457/3398/3624/128239/3978/11178/4085/84930/4172/4175/4176/9833/27085/4605/5111/5155/10769/10733/25886/5422/5557/5558/10213/5889/389/10…
GO:1903706	BP	GO:1903706	regulation of hemopoiesis	238	0.356552	1.52345	9.999e-05	0.00242704	0.00187151	2917	tags=47%, list=34%, signal=32%	6348/604/2213/64332/2113/2177/9290/8365/3559/3665/4254/639/5579/7099/677/1636/100/558/760/634/1051/1960/10875/2353/2621/3280/3398/3566/3624/3902/3976/407975/4602/54892/4830/4853/128506/10213/338382/5896/7057/6935/91/92/301/632/729230/972/942/1021/51208/1435/1437/11221/2124/2175/2200/27086/10272/2737/29909/8357/126961/333932/8353/121504/8370/8366/3142/3146/3205/3592/3593/51561/3565/3567/3574/3575/…
GO:2000145	BP	GO:2000145	regulation of cell motility	464	0.387725	1.6828	9.999e-05	0.00242704	0.00187151	2748	tags=47%, list=32%, signal=34%	6347/57175/2013/6348/1545/8519/6678/9590/1524/1588/1950/3690/378938/388/9806/56271/650/284119/29126/958/3627/23604/5168/2113/2841/3678/3655/4254/8829/57580/5270/57698/7015/1636/94/100/199/84962/154810/306/348110/10396/9564/728/999/634/4680/79846/10370/1277/1436/1496/6387/3576/4921/54567/1942/2065/2149/2335/2621/2822/10457/1839/3082/3162/3486/3488/285313/59352/4035/4233/4318/5031/5063/5154/5155/51…
GO:2000147	BP	GO:2000147	positive regulation of cell motility	283	0.400249	1.71795	9.999e-05	0.00242704	0.00187151	2545	tags=46%, list=29%, signal=34%	6348/6678/9590/1950/3690/378938/388/9806/650/284119/29126/958/3627/23604/5168/2113/3678/3655/4254/8829/57580/57698/7015/199/154810/306/10396/9564/728/4680/79846/1277/1436/6387/3576/4921/2149/2335/2621/2822/10457/1839/3082/3162/3488/59352/4035/4233/4318/5031/5063/5154/5155/5175/10769/5649/389/22800/10500/8482/153769/6546/10253/7057/7422/7448/81029/90/91/9510/301/84913/655/659/857/6352/3491/729230/…
GO:2001233	BP	GO:2001233	regulation of apoptotic signaling pathway	166	0.384771	1.62214	9.999e-05	0.00242704	0.00187151	1833	tags=37%, list=21%, signal=30%	1524/26471/6280/27113/672/23604/1649/2534/2934/2537/3655/4582/8829/7703/6279/7015/597/90427/1491/6387/220042/1869/50486/3082/3162/3624/81618/4055/4318/5414/8406/7027/7057/7078/8743/7185/7533/10449/90/367/409/79915/10018/627/857/960/972/1032/8837/1437/1512/2017/64798/80237/55179/63979/2852/8739/3383/3553/3574/388324
GO:0000082	BP	GO:0000082	G1/S transition of mitotic cell cycle	126	0.504584	2.09896	0.0001	0.00242704	0.00187151	1675	tags=47%, list=19%, signal=38%	6347/84515/58480/9134/993/8318/990/1719/55388/4173/4174/4582/4998/23594/23649/5933/6241/7015/7298/199/586/1017/1019/81620/1869/1978/10457/3398/3624/128239/4172/4175/4176/27085/5111/10769/5422/5557/5558/7027/90/91/9510/301/7832/995/983/1021/1026/1032/10106/10217/1543/10926/79733/2146/26271/51053/29933
GO:0001101	BP	GO:0001101	response to acid chemical	162	0.424753	1.78874	0.0001	0.00242704	0.00187151	2408	tags=46%, list=28%, signal=34%	6678/19/1645/1646/4914/5244/8644/358/493/1490/1291/1719/2534/2934/6472/7298/1109/360/440/445/1019/1051/1307/1277/64506/1869/2348/3490/3843/4602/4830/1728/5031/5111/5155/5166/6319/143686/7049/7422/7480/81029/6935/31/53335/824/652968/952/928/1032/1512/1536/84649/22943/1843/2707/54331/3383/3399/3485/9314/3856/3949/5602/9148/56034/80310/5159/65018/9033/5724/5732/5734/9536/5764
GO:0002449	BP	GO:0002449	lymphocyte mediated immunity	156	0.389607	1.63824	0.0001	0.00242704	0.00187151	1861	tags=38%, list=22%, signal=31%	2013/604/2213/57823/958/3119/3665/4436/91543/5272/51279/716/717/718/720/721/634/9156/10875/3543/3566/3902/5819/5551/710/6556/28526/203068/7374/409/79915/602/10384/727/729230/911/10666/970/972/925/1054/1380/1512/3077/3134/3146/3329/3383/3493/3494/3514/3592/3593/8809/8807/3553/51561/3565/3575/182
GO:0006310	BP	GO:0006310	DNA recombination	126	0.45102	1.87614	0.0001	0.00242704	0.00187151	2903	tags=57%, list=34%, signal=38%	604/84515/672/83990/958/8318/2187/51659/4173/4174/4436/5888/8438/79000/641/675/146956/9156/2237/84296/4172/4175/4176/84057/55010/10721/29893/10213/5889/5896/9401/116028/400629/7153/51377/7374/7516/10189/79915/201254/1111/11144/57697/63979/3005/3146/3329/3565/3575/54891/4171/253714/2956/79035/7468/5788/10635/5890/25788/5932/9985/6118/6119/25939/6932/7011/7037/8914/4796/9319/55135/7518
GO:0006909	BP	GO:0006909	phagocytosis	158	0.375478	1.57973	0.0001	0.00242704	0.00187151	2898	tags=47%, list=34%, signal=32%	6347/2212/19/2213/3690/929/2534/2934/7099/199/246/306/558/717/718/720/721/919/2621/7087/3543/3601/3560/4035/4233/10062/5031/5175/338382/6441/6556/8406/7052/7057/28526/301/1089/1053/23603/23191/2358/3146/3493/3494/3514/3553/3561/3683/3949/55646/8685/84466/64005/4647/4689/10787/5058/375033/8398/122618/5788/5795/5806/55647/11031/653509/729238/140885/10326/8877/7124/54209/7301/7410/644150
GO:0007568	BP	GO:0007568	aging	126	0.400508	1.66603	0.0001	0.00242704	0.00187151	2907	tags=52%, list=34%, signal=35%	604/968/4914/133/1490/2934/4436/8438/5933/7015/7298/100/445/597/675/27101/2353/3398/3488/4035/1728/4521/10769/710/22846/148/384/632/983/1021/1026/1028/1111/1268/1543/22943/9521/2022/30001/26271/2305/51022/3159/8091/3383/3485/9992/3868/3889/4311/2956/9891/5074/5079/5144/5159/5621/56729/6531/6720/7012/7076/8626/7412/83719
GO:0007611	BP	GO:0007611	learning or memory	116	0.390671	1.61797	0.0001	0.00242704	0.00187151	2441	tags=43%, list=28%, signal=31%	793/1524/4914/2534/3678/8516/11346/85461/10396/8704/1051/1393/1742/1959/2237/2258/2353/100132074/8997/10769/5896/5649/6446/23657/29767/7436/577/6310/627/80823/84446/7832/1141/1268/26047/22943/8811/3949/4130/4311/65009/4763/54413/4900/5021/56924/8398/5621/5764/5923
GO:0010466	BP	GO:0010466	negative regulation of peptidase activity	116	0.389893	1.61475	0.0001	0.00242704	0.00187151	1406	tags=32%, list=16%, signal=27%	871/5627/9806/358/2537/5272/5270/23145/2/27018/718/720/721/2621/3082/4318/5896/710/6590/6653/7057/7078/51377/7422/7448/3730/408/409/274/332/727/135228/960/1032/8837/340267/286204
GO:0010631	BP	GO:0010631	epithelial cell migration	155	0.383893	1.61394	0.0001	0.00242704	0.00187151	1923	tags=36%, list=22%, signal=29%	57175/2013/1545/6678/3690/388/958/1803/5168/2113/8829/11156/94/154810/306/9564/634/54567/1942/1960/10755/2822/1839/3162/4233/4318/5155/5175/10769/5872/90627/55333/7057/22846/7422/301/84913/659/29775/23332/23603/1512/11221/1969/83481/2246/8817/27086/152007/2896/10014/3146/3565/57608/9314/3868
GO:0010632	BP	GO:0010632	regulation of epithelial cell migration	123	0.404012	1.67784	0.0001	0.00242704	0.00187151	2544	tags=46%, list=29%, signal=33%	2013/6678/3690/388/958/5168/2113/8829/94/154810/306/9564/634/54567/1942/2822/1839/3162/4233/4318/5155/10769/90627/55333/7057/22846/7422/301/84913/659/29775/23332/23603/1512/11221/1969/83481/2246/8817/27086/152007/2896/10014/3146/3565/57608/9314/5606/4763/7026/8828/8613/5629/5764/28984/64218/9037
GO:0010876	BP	GO:0010876	lipid localization	154	0.387756	1.62968	0.0001	0.00242704	0.00187151	1261	tags=30%, list=15%, signal=26%	9619/80830/19/1645/1588/1950/3690/5244/114884/10350/1636/1109/23120/57205/10396/57198/718/634/1071/3624/4035/84879/4602/4833/10062/114880/140606/81537/10280/11309/6653/6696/7057/158219/7436/26154/21/8714/31/301/8542/80833/80832/79135/114897/857
GO:0031983	CC	GO:0031983	vesicle lumen	153	0.402613	1.69122	0.0001	0.00242704	0.00187151	1857	tags=37%, list=22%, signal=29%	2162/3959/5627/6414/6678/272/1950/10855/6280/1116/2934/6279/2/100/51816/23621/718/5199/23406/1522/2335/2621/9535/3043/3082/5154/5155/10213/25797/8635/710/6590/7057/7078/203068/7422/87/230/240/64333/10576/83716/1512/1521/23191/79980/8288/2171/2717/2896/3146/3240/388697/3310/3671/3700
GO:0032496	BP	GO:0032496	response to lipopolysaccharide	154	0.386876	1.62598	0.0001	0.00242704	0.00187151	2877	tags=47%, list=33%, signal=32%	6347/5142/6348/6678/19/9590/968/1524/133/929/29126/3627/2920/4360/6279/7099/445/558/728/923/1019/1051/1439/3576/2149/2353/2678/10062/6556/6590/11093/824/6352/4064/942/1053/129607/1268/1437/6373/1543/11221/27086/2679/55970/10014/3146/3248/3383/3587/3592/3593/3553/11213/345611/3726/3965/4016/114548/5144/5724/5732/5734/9536/5739/140885/4091/6915/7056/7124/54209/10221/7412
GO:0042623	MF	GO:0042623	ATPase activity, coupled	128	0.413369	1.72042	0.0001	0.00242704	0.00187151	3315	tags=64%, list=38%, signal=40%	9619/19/79659/5244/493/3801/4174/4436/5888/8438/5983/10350/9429/478/10396/641/1107/1763/4175/4176/10721/56852/5889/5982/5984/5985/7153/7516/26154/21/8714/225/79915/491/516/245973/534/11144/146754/79075/54821/63979/3306/3310/547/4171/2956/4643/4647/5890/25788/8458/10349/79963/154664/20/23461/23460/10347/23456/23457/85320/368/215/5826/64240/477/480/482/487/489/492/9914/506/514/518/515/92270/527/523…
GO:0043491	BP	GO:0043491	protein kinase B signaling	117	0.433605	1.79647	0.0001	0.00242704	0.00187151	2554	tags=50%, list=30%, signal=35%	6347/6348/1646/1524/1950/10855/8644/958/1116/1649/2534/4254/677/558/2065/2261/2621/1839/3082/3488/6453/4233/5154/5155/143686/10253/7057/409/685/114897/6352/942/2022/1969/2152/2246/8817/2264/2549/2852/3092/3553/152831/9314/56917/4486/3084/5159/375033/118788/65018/5314/59338/5795/23551/6237/9037/83667
GO:0043542	BP	GO:0043542	endothelial cell migration	116	0.428113	1.77304	0.0001	0.00242704	0.00187151	2544	tags=47%, list=29%, signal=34%	57175/2013/1545/6678/3690/388/958/1803/2113/8829/11156/94/154810/306/9564/634/54567/1942/1960/10755/2822/3162/4233/5155/5175/10769/5872/90627/55333/7057/22846/7422/301/84913/659/29775/1969/2246/8817/27086/2896/10014/3146/57608/9314/5606/4763/7026/8828/5629/5646/5764/28984/64218/9037
GO:0043900	BP	GO:0043900	regulation of multi-organism process	155	0.404625	1.7011	0.0001	0.00242704	0.00187151	2866	tags=50%, list=33%, signal=34%	6348/151636/8519/4940/83666/55601/340061/2934/3434/3559/5091/91543/100/164668/79846/1436/3576/79132/10875/51191/3429/24138/10410/3624/3669/3956/4599/5819/2494/4938/8654/5551/11251/6441/6590/7153/54765/91/140564/60489/384/10018/857/6352/4064/972/1268/23586/8468/27086/2896/8091/5654/3593/3553/51561/27074/3965/10184/23005/11043/8638/5021/151056/5629/5702/5724/5806/114132/400709/9126/7076/7113/7124/1…
GO:0045765	BP	GO:0045765	regulation of angiogenesis	163	0.418181	1.76157	0.0001	0.00242704	0.00187151	1908	tags=40%, list=22%, signal=32%	2013/1545/6678/1524/388/133/358/672/958/23670/1116/3627/5168/2113/3678/8829/5579/7015/94/306/718/728/634/3576/54567/1870/1942/10457/3082/28996/3162/126393/3696/10769/10253/90627/55333/7057/22846/7422/8038/577/79924/51129/301/187/694/29775/729230/1512/1536/2022/1969/2152/2246/8817/2549/2828/2896/10014/3099/8091/3553/140862/57608/9314
GO:0051251	BP	GO:0051251	positive regulation of lymphocyte activation	158	0.381956	1.60699	0.0001	0.00242704	0.00187151	2910	tags=49%, list=34%, signal=33%	6347/604/11148/64332/29126/958/1803/2534/3109/3115/3559/4436/7099/100/199/558/923/1960/2621/3280/3543/3566/3956/4602/5063/5896/28526/301/79915/857/6352/729230/30835/952/970/972/942/1026/1141/11221/1949/2737/3113/3134/3142/3146/3329/3485/3493/3494/3514/3592/3593/3553/51561/3565/3567/3574/3575/3718/3965/4323/114548/7468/5058/5788/140885/10326/8651/9840/7037/7070/7293/8744/9760/7412/64115/7535
GO:0060205	CC	GO:0060205	cytoplasmic vesicle lumen	153	0.402613	1.69122	0.0001	0.00242704	0.00187151	1857	tags=37%, list=22%, signal=29%	2162/3959/5627/6414/6678/272/1950/10855/6280/1116/2934/6279/2/100/51816/23621/718/5199/23406/1522/2335/2621/9535/3043/3082/5154/5155/10213/25797/8635/710/6590/7057/7078/203068/7422/87/230/240/64333/10576/83716/1512/1521/23191/79980/8288/2171/2717/2896/3146/3240/388697/3310/3671/3700
GO:0070371	BP	GO:0070371	ERK1 and ERK2 cascade	156	0.430871	1.81174	0.0001	0.00242704	0.00187151	2410	tags=48%, list=28%, signal=35%	6347/6348/9590/414062/1950/4914/650/1490/1116/9290/8829/7099/677/246/728/634/1436/1848/2149/338557/2261/2335/2621/10457/128239/3976/4035/4853/5031/5154/5155/8482/10253/55333/7078/148/389658/51074/408/409/6367/6352/3491/960/972/8837/1512/1843/11221/1969/2192/8817/2264/2322/2358/64762/152007/2852/3146/3383/3553/9314/3965/8685/65009/171389/255743/5021/56034/80310/5159/5245/5314/5734/5788
GO:0070663	BP	GO:0070663	regulation of leukocyte proliferation	116	0.386097	1.59903	0.0001	0.00242704	0.00187151	2910	tags=50%, list=34%, signal=34%	604/2213/11148/29126/958/3109/3115/3559/4254/7099/100/199/923/1051/5169/10457/3280/128506/8654/6441/11326/301/384/79915/6352/729230/30835/952/970/972/942/1026/1141/1435/3113/3146/3485/3592/3593/3553/51561/3565/3567/3574/3718/3965/5074/5621/5788/6385/7037/27242/7293/944/8744/7412/64115/7535
GO:0072593	BP	GO:0072593	reactive oxygen species metabolic process	126	0.389205	1.619	0.0001	0.00242704	0.00187151	2580	tags=46%, list=30%, signal=33%	1545/1524/8644/493/672/1490/54541/1719/2534/2537/57580/285590/7099/199/445/3043/1728/5155/5166/6441/9644/6697/7057/225/384/655/857/3491/57126/1026/8837/1536/1543/50506/8288/10516/2305/2358/2717/3045/3042/3099/3240/3383/3553/9314/654817/4689/91942/5159/65018/5366/10394/5740/5806/6095/83667/140885
GO:0090130	BP	GO:0090130	tissue migration	158	0.38248	1.60919	0.0001	0.00242704	0.00187151	1923	tags=36%, list=22%, signal=29%	57175/2013/1545/6678/3690/388/958/1803/5168/2113/8829/11156/94/154810/306/9564/634/54567/1942/1960/10755/2822/1839/3162/4233/4318/5155/5175/10769/5872/90627/55333/7057/22846/7422/59/301/84913/659/29775/23332/23603/1512/11221/1969/83481/2246/8817/27086/152007/2896/10014/3146/3565/57608/9314/3868
GO:0090132	BP	GO:0090132	epithelium migration	157	0.379601	1.59671	0.0001	0.00242704	0.00187151	1923	tags=36%, list=22%, signal=28%	57175/2013/1545/6678/3690/388/958/1803/5168/2113/8829/11156/94/154810/306/9564/634/54567/1942/1960/10755/2822/1839/3162/4233/4318/5155/5175/10769/5872/90627/55333/7057/22846/7422/301/84913/659/29775/23332/23603/1512/11221/1969/83481/2246/8817/27086/152007/2896/10014/3146/3565/57608/9314/3868
GO:1903039	BP	GO:1903039	positive regulation of leukocyte cell-cell adhesion	126	0.398997	1.65974	0.0001	0.00242704	0.00187151	2910	tags=52%, list=34%, signal=35%	6347/604/11148/64332/29126/1803/2113/2534/3109/3115/3559/100/199/923/1960/3280/3566/3956/4602/5063/5896/301/857/6352/729230/30835/960/970/972/942/11221/1949/2737/3113/3142/3146/3329/3383/3485/3592/3593/3553/51561/3565/3574/3575/3718/3965/10725/114548/8013/5058/5724/5788/140885/10326/8651/9840/7037/7070/7124/8744/7412/64115/7535
GO:0000793	CC	GO:0000793	condensed chromosome	110	0.454599	1.87706	0.00010001	0.00242704	0.00187151	2850	tags=59%, list=33%, signal=40%	672/2177/23397/5888/641/675/699/113130/1017/81620/1051/64946/55839/79682/387103/4085/54892/79023/23481/220134/10592/54908/6839/7153/7273/55055/11130/332/9184/1058/64105/79019/79172/201254/1111/9793/23332/11144/79980/6990/54821/8468/3146/3306/23421/11004/90417/9735/23310/64151/4751/83540/5810/1104/9985/151246/348235/221150/9126/10615/57405/10734/56155/11073/7283
GO:0007050	BP	GO:0007050	cell cycle arrest	108	0.419834	1.73136	0.00010001	0.00242704	0.00187151	2499	tags=50%, list=29%, signal=36%	672/1649/4436/4582/168448/1017/1019/8851/3576/220042/1869/2621/3398/3624/27085/4853/5111/10769/23645/7027/7057/22846/7480/274/7832/8555/995/983/1021/1026/1028/1032/1843/79733/10595/2124/2305/2619/10634/8522/2852/26959/8091/3592/3593/3623/133746/51776/51085/53632/3276/5621/28984/56475
GO:0007266	BP	GO:0007266	Rho protein signal transduction	111	0.432129	1.78484	0.00010001	0.00242704	0.00187151	3234	tags=62%, list=37%, signal=39%	19/50650/604/4983/57480/388/58480/10602/2841/9290/23263/8829/57580/57698/55701/1894/2149/221472/57493/6453/8997/4233/84033/5175/26030/389/55333/148/395/9828/26084/7984/408/11135/148170/8727/2151/9002/10160/121512/2828/8477/23101/10276/5159/5923/171177/27289/8153/390/65078/221178/3925/79933/7410/150/11214/393/143872/397/398/55160/9826/27237/115557/389337/84904/9459/8874
GO:0010951	BP	GO:0010951	negative regulation of endopeptidase activity	110	0.39754	1.64146	0.00010001	0.00242704	0.00187151	1406	tags=33%, list=16%, signal=28%	871/5627/9806/358/2537/5272/5270/2/27018/718/720/721/2621/3082/4318/5896/710/6590/6653/7057/7078/51377/7422/7448/3730/408/409/274/332/727/135228/960/1032/8837/340267/286204
GO:0030100	BP	GO:0030100	regulation of endocytosis	118	0.403233	1.67162	0.00010001	0.00242704	0.00187151	2813	tags=50%, list=33%, signal=34%	6347/1950/2213/3690/4983/929/246/558/717/718/720/721/1742/2621/3601/3560/6453/4035/10062/29763/6441/6556/85439/55333/7422/7448/8862/408/409/274/857/57126/1601/22943/1815/2358/3077/3092/3146/3553/3561/3565/55646/5788/5795/5806/64284/55647/11031/6424/653509/729238/140885/10326/8877/112755/7124/10188/54209
GO:0030246	MF	GO:0030246	carbohydrate binding	118	0.391176	1.62164	0.00010001	0.00242704	0.00187151	2609	tags=47%, list=30%, signal=34%	80216/1116/131544/5168/11226/3122/4360/8974/6402/721/5169/2203/3956/4973/6441/6614/27180/6518/7448/26033/63827/50489/30835/1117/10462/6320/728276/51267/50856/10332/23601/1203/1272/202/112399/8909/2022/79695/8693/56261/3099/80201/3123/55600/85329/3965/8972/10536/10394/5806/22934/653509/729238/114132/400709/6515
GO:0030595	BP	GO:0030595	leukocyte chemotaxis	120	0.389466	1.61552	0.00010001	0.00242704	0.00187151	1945	tags=37%, list=23%, signal=29%	6347/5142/6348/414062/1588/6280/3627/2920/23604/2841/57580/6279/30817/199/728/6387/3576/2621/5155/6441/7057/7422/301/7984/387695/727/6367/6352/729230/972/1435/6373/1843/1907/2358/3146/3592/23765/84818/3553/51561/3672/120425/3965
GO:0034599	BP	GO:0034599	cellular response to oxidative stress	119	0.413191	1.71338	0.00010001	0.00242704	0.00187151	2352	tags=45%, list=27%, signal=33%	1545/2034/388/8644/358/1719/2113/2177/2534/7703/7099/199/558/1017/1894/2119/2353/3082/3162/9833/4233/4318/4602/1728/5111/5625/10280/23657/221/301/468/655/983/8837/1536/54205/30001/2146/10516/51022/2882/493869/8807/23135/9314/4689/10276/51314/4929/8013/5074/80310/65018/59338
GO:0046578	BP	GO:0046578	regulation of Ras protein signal transduction	120	0.422327	1.75183	0.00010001	0.00242704	0.00187151	3234	tags=61%, list=37%, signal=39%	19/50650/604/4914/4983/57480/2841/9290/4254/23263/8829/57580/23362/55701/1894/2057/2149/2203/221472/57493/6453/8997/4233/4853/84033/26030/10253/50861/148/9828/26084/7984/408/26053/1435/27128/2151/9002/10160/121512/2305/2828/8477/23096/440073/23101/10276/4763/3084/5159/5662/5921/22821/221002/5923/65078/221178/10251/3925/79933/7410/11214/57221/143872/397/55160/9826/27237/115557/389337/84904/9459/88…
GO:0048872	BP	GO:0048872	homeostasis of number of cells	109	0.412511	1.70231	0.00010001	0.00242704	0.00187151	2083	tags=41%, list=24%, signal=32%	5142/1831/272/604/2034/2113/3559/4254/677/100/558/139818/2149/28996/3162/3398/3624/4151/407975/54892/5896/23657/7049/7422/91/92/301/10018/729230/972/1021/1054/1435/2146/2271/2322/3146/3574/3575/387597/3623/3718/3965/55646/9935
GO:0050731	BP	GO:0050731	positive regulation of peptidyl-tyrosine phosphorylation	109	0.489125	2.01847	0.00010001	0.00242704	0.00187151	1826	tags=49%, list=21%, signal=39%	83666/1950/3690/958/5168/2534/3678/4254/8829/54625/1636/84632/1436/1742/1942/2043/2065/2261/2621/1839/3280/3082/3976/54892/5155/5175/5649/9021/80725/55620/7422/7448/90/148/389658/23568/409/627/6352/960/972/1272/1437/2322/2690/3383/3589/3592/3593/51561/133396/3565/3567
GO:0050870	BP	GO:0050870	positive regulation of T cell activation	114	0.395792	1.63741	0.00010001	0.00242704	0.00187151	2910	tags=51%, list=34%, signal=34%	6347/604/11148/64332/29126/1803/2534/3109/3115/3559/100/199/923/1960/3280/3566/3956/4602/5063/5896/301/857/6352/729230/30835/970/972/942/11221/1949/2737/3113/3142/3146/3329/3485/3592/3593/3553/51561/3565/3574/3575/3718/3965/114548/5058/5788/140885/10326/8651/9840/7037/7070/8744/7412/64115/7535
GO:0050920	BP	GO:0050920	regulation of chemotaxis	111	0.398673	1.64666	0.00010001	0.00242704	0.00187151	2585	tags=47%, list=30%, signal=33%	6347/57175/6348/1588/3627/23604/2841/8829/347733/199/728/6387/3576/2621/4233/5155/10500/8482/7057/7422/659/727/6352/729230/972/1435/1843/1907/2152/2246/8817/2358/3146/3592/51561/3965/11223/11240/80310/5159/91584/5764/7869/10512/223117/6405/56920/64218/57715/9037/10501/56833
GO:0051402	BP	GO:0051402	neuron apoptotic process	108	0.431467	1.77933	0.00010001	0.00242704	0.00187151	1211	tags=33%, list=14%, signal=29%	6347/6348/1524/4914/26471/1649/2534/4436/8829/7015/558/23621/728/8851/1051/1522/2065/2149/28996/3162/6453/4035/4602/4605/22861/1728/5063/10280/7516/408/409/468/10018/627/80823/7832
GO:0071216	BP	GO:0071216	cellular response to biotic stimulus	108	0.40544	1.672	0.00010001	0.00242704	0.00187151	1847	tags=36%, list=21%, signal=29%	6347/5142/6348/19/968/1524/2213/929/29126/3627/2920/1649/4360/7099/445/558/923/1019/1051/3576/146956/10062/11093/10018/824/6352/4064/942/1053/129607/1437/6373/10014/3146/3383/3592/3593/3553/345611
GO:0071824	BP	GO:0071824	protein-DNA complex subunit organization	110	0.427997	1.76722	0.00010001	0.00242704	0.00187151	1757	tags=42%, list=20%, signal=34%	55723/8318/10036/8208/8365/4173/4174/5888/81620/64946/55839/55166/79682/387103/8349/8520/3070/4172/4175/4176/54069/7480/81611/1058/2491/64105/91687/79019/79172/201254/11144/51053/3005/8348/440689/8347/3017/8357/126961/333932/8353/121504/8370/8366/3159/3146
GO:0090092	BP	GO:0090092	regulation of transmembrane receptor protein serine/threonine kinase signaling pathway	114	0.388834	1.60862	0.00010001	0.00242704	0.00187151	1835	tags=40%, list=21%, signal=32%	650/83729/8516/94/10370/2348/10468/10755/64388/3280/28996/3624/4036/407975/5046/6653/7041/7049/7057/6935/90/91/92/93/9719/25805/283149/655/659/857/3491/135228/1028/286204/1601/199699/22943/2022/2200/2201/2297/10272/3077/5654/3623/3626
GO:0097193	BP	GO:0097193	intrinsic apoptotic signaling pathway	122	0.427294	1.77394	0.00010001	0.00242704	0.00187151	1589	tags=38%, list=18%, signal=31%	1545/26471/6280/27113/672/837/79094/23604/1649/54541/2537/4436/4582/6279/597/90427/675/1051/6387/220042/1869/1870/28996/3162/9833/4318/23645/5625/5414/81537/64782/79915/468/10018/602/857/960/972/1026/1032/80237/1969/10595/30001/2272/63979
GO:0097237	BP	GO:0097237	cellular response to toxic substance	111	0.394838	1.63081	0.00010001	0.00242704	0.00187151	3107	tags=55%, list=36%, signal=36%	1545/4914/388/6280/358/1719/2113/7703/5742/9429/558/1894/3043/3082/3162/4233/4602/1728/5111/5155/10280/25841/241/301/655/983/1193/1536/50506/8288/2146/10516/2882/493869/3045/3042/3240/8807/26034/23135/9314/10276/8013/5074/80310/65018/59338/145226/83667/140885/8877/8914/7124/7173/84817/51157/60/113/10974/57016/213
GO:0097529	BP	GO:0097529	myeloid leukocyte migration	111	0.421146	1.73948	0.00010001	0.00242704	0.00187151	1866	tags=40%, list=22%, signal=31%	6347/5142/6348/414062/1524/1588/6280/3627/2920/23604/57580/6279/30817/199/728/6387/3576/5155/5175/6441/7057/7422/301/7984/727/6367/6352/729230/57126/972/928/1435/6373/1843/1907/8288/2358/3146/23765/84818/3553/51561/3672/120425
GO:1901605	BP	GO:1901605	alpha-amino acid metabolic process	111	0.421443	1.7407	0.00010001	0.00242704	0.00187151	1661	tags=37%, list=19%, signal=30%	259307/501/26227/51268/29968/10157/493/8528/84706/8974/6472/6999/440/445/586/548596/1159/1491/1503/2653/2678/2875/5625/23657/9056/6611/191/7915/51074/384/113451/642/57571/102724560/1638/112399/30001/56605/10841/23464/27232
GO:1901988	BP	GO:1901988	negative regulation of cell cycle phase transition	114	0.396823	1.64167	0.00010001	0.00242704	0.00187151	1576	tags=36%, list=18%, signal=30%	6347/672/990/63967/4582/4998/5933/677/641/699/1017/1019/81620/51514/1869/10457/4085/5111/10769/10213/54908/7027/90381/84446/7832/9184/387695/8555/995/983/1021/1026/1032/1111/10106/10217/29980/1843/79733/2146/26271
GO:1904018	BP	GO:1904018	positive regulation of vasculature development	111	0.457774	1.89076	0.00010001	0.00242704	0.00187151	1908	tags=45%, list=22%, signal=36%	1545/1524/388/133/358/672/958/1116/2113/3678/8829/5579/7015/94/306/718/728/634/1491/3576/3082/28996/3162/126393/3696/5155/10769/7057/7422/8038/79924/51129/301/187/694/8837/1512/1536/2022/2152/2246/8817/2549/2852/2896/3099/8091/3553/57608/9314
GO:2000116	BP	GO:2000116	regulation of cysteine-type endopeptidase activity	109	0.402064	1.6592	0.00010001	0.00242704	0.00187151	2361	tags=44%, list=27%, signal=32%	6280/358/27113/837/1490/2534/2934/2537/4210/6279/5272/27018/2149/2621/3082/4318/22861/5896/7057/8743/9966/7422/408/409/10018/332/838/3491/960/1032/8837/1512/54205/112399/2152/2852/3092/3146/3329/3336/9314/27074/3965/114548/5023/9141/5329/5366
GO:0002573	BP	GO:0002573	myeloid leukocyte differentiation	107	0.45956	1.89407	0.00010002	0.00242704	0.00187151	1871	tags=47%, list=22%, signal=37%	6348/9290/3665/4254/7099/10100/677/116071/55509/760/634/1051/1436/2353/3398/3624/3976/4055/4318/4830/4853/128506/8544/9644/29887/10537/7422/632/135228/972/1021/1050/1053/51208/1435/1437/25979/1969/2124/2200/27086/10272/3593/51561/133396/3565/3567/3623/3662/3726
GO:0070374	BP	GO:0070374	positive regulation of ERK1 and ERK2 cascade	107	0.452858	1.86645	0.00010002	0.00242704	0.00187151	2410	tags=50%, list=28%, signal=36%	6347/6348/9590/414062/4914/650/1490/1116/9290/8829/7099/246/728/1436/2149/338557/2261/2621/10457/4035/4853/5031/5154/5155/8482/10253/148/389658/408/409/6367/6352/960/972/8837/8817/2264/2322/2358/64762/152007/2852/3146/3383/3965/8685/65009/255743/56034/80310/5159/5245/5788
GO:0072331	BP	GO:0072331	signal transduction by p53 class mediator	115	0.392645	1.62508	0.00010002	0.00242704	0.00187151	2801	tags=50%, list=32%, signal=34%	26471/672/83990/54541/4436/4582/5983/641/675/1017/8851/1107/1763/1869/1870/9156/28996/5600/5111/10769/10848/5982/5984/5985/116028/7027/64782/79915/602/7832/960/972/995/983/1026/1111/79733/9521/80237/2272/2305/133746/10397/9891/5366/53632/3276/5810/5932/28984/6118/6119/83667/6591/11073/8626/7161
GO:0006302	BP	GO:0006302	double-strand break repair	104	0.477517	1.96412	0.00010004	0.00242704	0.00187151	2903	tags=60%, list=34%, signal=40%	151636/83666/157570/84515/672/83990/8318/2187/51659/8365/4173/4174/4436/5888/8438/79000/641/675/113130/64858/1763/146956/2237/84296/4172/4175/4176/55010/5422/10721/10213/5889/9401/116028/7516/1111/11144/63979/2305/121504/8370/8366/8091/4171/253714/79035/7468/10038/286257/10635/5890/25788/5932/9985/6118/6119/25939/8914/4796/9319/55135/7518
GO:0034341	BP	GO:0034341	response to interferon-gamma	105	0.483497	1.98994	0.00010004	0.00242704	0.00187151	1847	tags=45%, list=21%, signal=36%	6347/6348/8519/4940/83666/414062/4261/115361/2934/3115/3119/3122/3127/3665/4210/4360/4939/54625/7099/199/445/2634/3117/10410/4502/9111/10062/4938/338382/6556/9021/10537/11093/6367/6352/960/163351/3113/3120/3123/3134/3383/3459/3593/3662/10379/345611
GO:0051607	BP	GO:0051607	defense response to virus	106	0.489695	2.01667	0.00010004	0.00242704	0.00187151	1134	tags=35%, list=13%, signal=31%	3437/151636/8519/4940/83666/55601/4600/340061/958/3627/54541/2537/3434/3559/3665/4939/91543/64108/164668/79132/10875/51191/3429/10964/3433/24138/10410/3669/4599/4938/10622/51728/5551/6773/54765/140564/60489
GO:0051896	BP	GO:0051896	regulation of protein kinase B signaling	103	0.432056	1.77566	0.00010004	0.00242704	0.00187151	2544	tags=50%, list=29%, signal=35%	6348/1646/1524/1950/10855/8644/1116/1649/2534/4254/558/2065/2261/2621/1839/3082/3488/6453/4233/5154/5155/143686/10253/7057/409/685/114897/942/2022/1969/2152/2246/8817/2264/2549/2852/3092/152831/9314/56917/4486/3084/5159/118788/65018/5314/59338/5795/23551/6237/9037
GO:0065004	BP	GO:0065004	protein-DNA complex assembly	101	0.445973	1.83029	0.00010005	0.00242704	0.00187151	2493	tags=51%, list=29%, signal=37%	55723/8318/10036/8208/8365/4173/4174/5888/81620/64946/55839/55166/79682/387103/8349/8520/3070/4172/4175/4176/54069/7480/1058/2491/64105/91687/79019/79172/201254/11144/51053/3005/8348/440689/8347/3017/8357/126961/333932/8353/121504/8370/8366/3146/23421/4171/4678/11339/23569/5702/6118/6119
GO:0000075	BP	GO:0000075	cell cycle checkpoint	100	0.432326	1.77283	0.00010006	0.00242704	0.00187151	1496	tags=39%, list=17%, signal=33%	672/83990/8318/990/63967/4436/4582/4998/641/699/1017/81620/64858/1763/51514/1869/146956/4085/5111/10769/54908/7027/90381/54962/7153/79968/55055/11130/84446/7832/9184/8555/995/983/1026/1111/29980/1843/79733
GO:0005085	MF	GO:0005085	guanyl-nucleotide exchange factor activity	100	0.430132	1.76383	0.00010006	0.00242704	0.00187151	3234	tags=62%, list=37%, signal=39%	54453/50650/1950/57480/9467/6764/23263/57580/23362/25780/117289/55701/139818/23348/1894/221472/6453/8997/84033/26030/153020/10235/23179/9828/26084/7984/27128/163259/23258/9732/57572/8891/10160/121512/390637/23096/440073/23101/10276/5662/5739/5866/29098/10411/221002/5923/1104/10044/221178/6915/100128327/7410/11214/57221/55160/9826/27237/115557/389337/84904/9459/8874
GO:0030027	CC	GO:0030027	lamellipodium	100	0.449275	1.84233	0.00010006	0.00242704	0.00187151	1582	tags=39%, list=18%, signal=32%	57175/84168/57514/3690/1803/6624/2934/4254/4210/57698/8470/199/84962/154810/348110/9564/999/1496/1500/221472/6453/130271/5872/80725/8936/51225/59/10297/822/55704/57126/960/23603/2017/23191/1809/1969/10979/121512
GO:0031348	BP	GO:0031348	negative regulation of defense response	100	0.420252	1.72332	0.00010006	0.00242704	0.00187151	2585	tags=51%, list=30%, signal=36%	1588/2213/2113/3559/4210/54625/5272/2/100/10203/634/79132/5169/338557/10875/3082/9111/10062/710/9021/11326/225/384/409/11221/2358/2852/2896/3134/5654/3593/3565/11213/9314/3949/3965/23005/100507436/84166/114548/171389/4907/55872/5734/5740/5788/6095/25939/114132/140885/56833
GO:0000775	CC	GO:0000775	chromosome, centromeric region	97	0.459048	1.87964	0.00010007	0.00242704	0.00187151	2733	tags=59%, list=32%, signal=41%	157570/699/113130/81620/1051/64946/55839/55166/79682/387103/3070/4085/54069/27085/79023/220134/54908/6839/55055/11130/332/9184/23468/55143/1058/2491/64105/91687/79019/79172/201254/9793/23332/79075/79980/6990/54821/23421/3835/11004/90417/9735/23310/64151/4751/83540/11339/5314/9985/151246/348235/221150/9126/10615/57405/10734/56155
GO:0002285	BP	GO:0002285	lymphocyte activation involved in immune response	95	0.430266	1.75961	0.00010007	0.00242704	0.00187151	2542	tags=51%, list=29%, signal=36%	604/2213/64332/958/3109/4436/7099/100/634/139818/9156/10875/3566/3956/4602/4853/6097/6556/7374/301/79915/602/4064/911/942/27086/3134/3142/3146/3329/3383/3593/8809/51561/3565/3662/3683/3718/3965/4063/2956/114548/7468/23228/5734/5788/6095/64218
GO:0043523	BP	GO:0043523	regulation of neuron apoptotic process	97	0.460088	1.8839	0.00010007	0.00242704	0.00187151	1211	tags=36%, list=14%, signal=31%	6347/6348/1524/4914/26471/1649/2534/4436/8829/7015/558/23621/728/8851/1051/1522/2065/2149/28996/3162/6453/4035/4602/4605/1728/5063/10280/7516/408/409/468/10018/627/80823/7832
GO:0045766	BP	GO:0045766	positive regulation of angiogenesis	99	0.46362	1.90003	0.00010007	0.00242704	0.00187151	1908	tags=45%, list=22%, signal=36%	1545/1524/388/133/358/672/958/1116/2113/3678/8829/5579/7015/94/306/718/728/3576/3082/28996/3162/126393/3696/10769/7057/7422/8038/79924/51129/301/187/694/1512/1536/2022/2152/2246/8817/2549/2896/3099/8091/3553/57608/9314
GO:0051701	BP	GO:0051701	interaction with host	95	0.424794	1.73723	0.00010007	0.00242704	0.00187151	1945	tags=42%, list=23%, signal=33%	8519/3690/1803/2934/3434/3678/4360/5091/5272/7298/290/558/999/1500/3576/2621/28996/10410/3956/4233/5819/10572/6510/10189/10018/857/30835/972/942/983/10332/23601/1380/1949/1969/3383/3693/3695/3949/3965
GO:0097305	BP	GO:0097305	response to alcohol	97	0.438671	1.79621	0.00010007	0.00242704	0.00187151	1909	tags=41%, list=22%, signal=32%	6348/6678/19/1646/8644/672/929/2534/2934/5888/6279/7298/641/999/1019/1393/1978/2353/2822/3490/3624/1728/5031/10213/7049/31/632/983/1026/1141/51208/1268/1536/1815/54331/3157/3248/3383/9314/687
GO:0006323	BP	GO:0006323	DNA packaging	94	0.477491	1.95164	0.00010008	0.00242704	0.00187151	2274	tags=53%, list=26%, signal=40%	55723/10036/8208/8365/23397/113130/64946/55839/55166/79682/387103/8349/8520/3070/54069/54892/10592/7153/7273/983/1058/2491/64105/91687/79019/79172/201254/10595/2852/3005/8348/440689/8347/3017/8357/126961/333932/8353/121504/8370/8366/3159/8091/23421/4171/4678/23310/64151/11339/23569
GO:0010594	BP	GO:0010594	regulation of endothelial cell migration	92	0.444904	1.81559	0.00010008	0.00242704	0.00187151	2544	tags=51%, list=29%, signal=36%	2013/6678/3690/388/958/2113/8829/94/154810/306/9564/634/54567/1942/2822/3162/4233/5155/10769/90627/55333/7057/22846/7422/301/84913/659/29775/1969/2246/8817/27086/2896/10014/3146/57608/9314/5606/4763/7026/8828/8613/5629/5764/28984/64218/9037
GO:0071346	BP	GO:0071346	cellular response to interferon-gamma	94	0.47506	1.9417	0.00010008	0.00242704	0.00187151	1847	tags=45%, list=21%, signal=36%	6347/6348/4940/83666/414062/4261/115361/2934/3115/3119/3122/3127/3665/4360/4939/54625/7099/199/445/2634/3117/4502/9111/10062/4938/338382/9021/11093/6367/6352/960/163351/3113/3120/3123/3134/3383/3459/3593/3662/10379/345611
GO:0031099	BP	GO:0031099	regeneration	93	0.464304	1.89627	0.00010009	0.00242704	0.00187151	1931	tags=47%, list=22%, signal=37%	133/1719/2934/4837/349667/7298/306/558/728/825/1019/1051/6387/2043/2348/2621/3082/3162/59352/4035/58529/4974/5111/5792/6696/7049/7448/7480/301/928/983/1026/8837/11221/83481/2146/2322/2735/2737/2896/3077/9314/83999/3913
GO:0032993	CC	GO:0032993	protein-DNA complex	93	0.439003	1.79294	0.00010009	0.00242704	0.00187151	1845	tags=42%, list=21%, signal=33%	26471/8318/1649/9837/51659/8365/23649/7015/2353/84296/8330/8334/3015/8349/4172/5111/5422/10714/5557/5558/5896/1058/29980/3005/8329/723790/8348/440689/8347/3017/8357/126961/333932/8353/121504/8370/8366/8091/3662
GO:0006261	BP	GO:0006261	DNA-dependent DNA replication	89	0.569416	2.3181	0.0001001	0.00242704	0.00187151	1654	tags=57%, list=19%, signal=47%	604/9134/8318/990/9837/51659/64785/55388/4173/4174/4998/23594/23649/5888/5983/641/675/1017/81620/1763/146956/2237/84296/3978/4172/4175/4176/5111/5422/10714/10721/5557/5558/9401/5982/5984/5985/10535/90381/54962/11169/10189/79915/201254/10926/29980/79075/79733/57697/26271/51053
GO:0007093	BP	GO:0007093	mitotic cell cycle checkpoint	79	0.444646	1.79806	0.0001001	0.00242704	0.00187151	1496	tags=41%, list=17%, signal=34%	672/990/63967/4436/4582/4998/641/699/1017/81620/64858/1869/146956/4085/5111/10769/54908/7027/90381/54962/7153/55055/11130/84446/7832/9184/995/983/1026/29980/1843/79733
GO:0071466	BP	GO:0071466	cellular response to xenobiotic stimulus	79	0.494069	1.99791	0.0001001	0.00242704	0.00187151	1433	tags=39%, list=17%, signal=33%	2052/1545/1645/26227/358/54541/114907/2941/5742/199/445/134147/1393/1869/1978/2678/4176/1728/5106/5111/5155/6097/6546/55151/91703/57491/8837/1543/1548/1565/29785
GO:0019838	MF	GO:0019838	growth factor binding	88	0.484465	1.96973	0.00010011	0.00242704	0.00187151	1904	tags=49%, list=22%, signal=38%	3690/4914/1490/1291/3559/3655/8829/2/94/1277/2065/2261/3486/3487/3488/3490/3560/5046/5154/5155/6272/7049/7057/90/91/92/93/659/3491/135228/1289/1843/2022/2264/2690/9001/5654/3485/3587/3590/3561/3691/152831
GO:0046890	BP	GO:0046890	regulation of lipid biosynthetic process	85	0.456399	1.85292	0.00010011	0.00242704	0.00187151	2999	tags=62%, list=35%, signal=41%	9619/23682/133/8644/650/672/718/1019/634/2822/3490/3638/10062/5154/5155/5166/6319/225/57406/31/301/824/3491/972/84649/1717/10613/2171/2222/2224/2246/2264/2358/2852/3157/3553/3949/51085/8398/5629/5901/85414/6591/10580/8877/6713/6720/7124/57761/26137/215/33/2181
GO:0051897	BP	GO:0051897	positive regulation of protein kinase B signaling	85	0.448335	1.82018	0.00010011	0.00242704	0.00187151	2439	tags=49%, list=28%, signal=36%	6348/1646/1524/1950/10855/8644/1116/2534/4254/558/2065/2261/2621/1839/3082/3488/6453/4233/5154/5155/10253/7057/409/685/114897/942/2022/2152/2246/8817/2264/2549/3092/152831/56917/4486/3084/5159/118788/65018/5795/23551
GO:0140097	MF	GO:0140097	catalytic activity, acting on DNA	84	0.585684	2.37657	0.00010012	0.00242704	0.00187151	1009	tags=49%, list=12%, signal=44%	84515/83990/8318/9837/51659/4173/4174/89797/23649/5888/8438/5983/7015/641/1107/64858/1763/146956/9156/2237/84296/3669/3978/4172/4175/4176/55247/4830/5111/5422/10714/10721/56852/5889/5896/9401/5982/5984/5985/7153/7374
GO:0005178	MF	GO:0005178	integrin binding	83	0.439923	1.78322	0.00010016	0.00242704	0.00187151	3026	tags=61%, list=35%, signal=40%	2013/3690/1490/3678/1307/6387/2335/10457/7087/3696/8482/6696/7045/7057/7448/87/8745/11093/3491/57126/10666/928/10518/1289/10516/2200/2246/3146/3383/3384/3553/26548/3691/3693/3695/120425/3913/4323/255743/3084/5764/7060/7070/7402/7412/88/89/4185/8754/11096/11095
GO:0006333	BP	GO:0006333	chromatin assembly or disassembly	83	0.452081	1.83251	0.00010016	0.00242704	0.00187151	2274	tags=51%, list=26%, signal=38%	55723/10036/8208/8365/64946/55839/55166/79682/387103/1107/8349/8520/3070/54069/1058/2491/64105/91687/79019/79172/201254/3005/8348/440689/8347/3017/8357/126961/333932/8353/121504/8370/8366/8479/3159/8091/23421/4171/4678/11339/11240/23569
GO:0008083	MF	GO:0008083	growth factor activity	83	0.439992	1.7835	0.00010016	0.00242704	0.00187151	1861	tags=46%, list=22%, signal=36%	1950/650/1490/83729/4254/51816/6387/2258/9535/1839/3082/3624/3976/5154/5155/7422/627/655/685/441549/6320/1435/1437/22943/2202/8909/2246/8817/2896/3589/3592/3593/3565/3567/3574/3623/3626/182
GO:0034728	BP	GO:0034728	nucleosome organization	78	0.435449	1.75843	0.00010016	0.00242704	0.00187151	2274	tags=49%, list=26%, signal=36%	55723/10036/8208/8365/64946/55839/55166/79682/387103/8349/8520/54069/81611/1058/2491/64105/91687/79019/79172/201254/3005/8348/440689/8347/3017/8357/126961/333932/8353/121504/8370/8366/3159/23421/4171/4678/11339/23569
GO:0035023	BP	GO:0035023	regulation of Rho protein signal transduction	78	0.451249	1.82223	0.00010016	0.00242704	0.00187151	3234	tags=65%, list=37%, signal=41%	19/50650/604/4983/57480/2841/9290/23263/8829/57580/55701/1894/2149/221472/57493/6453/8997/4233/84033/26030/148/9828/26084/7984/408/2151/9002/10160/121512/2828/8477/23101/10276/5159/5923/65078/221178/3925/79933/7410/11214/143872/397/55160/9826/27237/115557/389337/84904/9459/8874
GO:0051099	BP	GO:0051099	positive regulation of binding	83	0.428126	1.73541	0.00010016	0.00242704	0.00187151	1908	tags=41%, list=22%, signal=32%	151636/83666/1950/340061/650/8829/7015/1636/113130/81620/2043/3280/28996/4035/22924/4233/4318/4830/10769/7448/408/25805/627/857/1054/1193/1203/51053/3005/3077/8091/3146/3662/9314
GO:0061572	BP	GO:0061572	actin filament bundle organization	78	0.432898	1.74812	0.00010016	0.00242704	0.00187151	2708	tags=53%, list=31%, signal=36%	57175/388/1490/6624/8829/285590/57698/11346/199/10391/4233/90102/389/171024/87/83543/395/7984/408/55616/23332/1809/221061/8477/3693/4739/5058/5074/221692/5358/5734/10411/359845/28984/27289/8153/390/6385/10580/3925/79933
GO:0070665	BP	GO:0070665	positive regulation of leukocyte proliferation	78	0.464034	1.87386	0.00010016	0.00242704	0.00187151	1945	tags=49%, list=23%, signal=38%	604/11148/29126/958/3109/3115/3559/4254/7099/100/199/923/3280/128506/301/79915/6352/729230/30835/952/970/972/942/1026/1141/1435/3113/3146/3485/3592/3593/3553/51561/3565/3567/3574/3718/3965
GO:1901654	BP	GO:1901654	response to ketone	83	0.4465	1.80989	0.00010016	0.00242704	0.00187151	2408	tags=52%, list=28%, signal=38%	1646/5244/8644/358/54541/114907/7298/445/768/1019/1978/2353/3490/4830/10062/5031/5106/5111/6696/7049/7057/31/367/632/57828/857/952/1026/8837/1536/28960/1843/54331/3383/9314/687/4678/5021/5723/5724/5732/5734/5764
GO:1902107	BP	GO:1902107	positive regulation of leukocyte differentiation	83	0.431184	1.7478	0.00010016	0.00242704	0.00187151	2910	tags=57%, list=34%, signal=38%	604/64332/3559/4254/677/100/558/760/1960/2353/2621/3398/3566/3976/4602/128506/5896/301/972/942/1435/11221/2124/2737/3142/3146/3592/3593/51561/3565/3567/3574/3575/3965/4323/114548/5788/4920/8651/9840/7124/8744/9760/54209/10221/64115/7535
GO:0045807	BP	GO:0045807	positive regulation of endocytosis	73	0.440148	1.76649	0.00010018	0.00242704	0.00187151	2813	tags=55%, list=33%, signal=37%	6347/1950/2213/929/558/717/718/720/721/2621/3601/3560/6453/4035/6441/6556/7422/7448/8862/408/409/1601/2358/3077/3092/3553/3561/3565/55646/5788/5795/5806/11031/6424/653509/729238/140885/10326/7124/54209
GO:0006633	BP	GO:0006633	fatty acid biosynthetic process	74	0.441695	1.77458	0.00010019	0.00242704	0.00187151	3126	tags=65%, list=36%, signal=42%	8644/672/11343/5742/11332/6296/246/634/401494/3638/10062/5166/6319/225/84696/31/84532/55902/240/241/301/972/1543/1565/1907/10613/2171/9415/3248/7923/3553/344967/51085/53632/5730/9536/5740/79966/85414/57761/215/33/47/134526/2181/116285/239/59344
GO:0030260	BP	GO:0030260	entry into host cell	74	0.436053	1.75191	0.00010019	0.00242704	0.00187151	1945	tags=45%, list=23%, signal=35%	8519/3690/1803/2934/3678/4360/290/558/999/1500/3576/2621/10410/3956/4233/5819/10572/6510/857/30835/972/942/983/10332/23601/1380/1949/1969/3383/3693/3695/3949/3965
GO:0044409	BP	GO:0044409	entry into host	74	0.436053	1.75191	0.00010019	0.00242704	0.00187151	1945	tags=45%, list=23%, signal=35%	8519/3690/1803/2934/3678/4360/290/558/999/1500/3576/2621/10410/3956/4233/5819/10572/6510/857/30835/972/942/983/10332/23601/1380/1949/1969/3383/3693/3695/3949/3965
GO:0050671	BP	GO:0050671	positive regulation of lymphocyte proliferation	74	0.448245	1.8009	0.00010019	0.00242704	0.00187151	1945	tags=47%, list=23%, signal=37%	604/11148/29126/958/3109/3115/3559/7099/100/199/923/3280/301/79915/6352/729230/30835/952/970/972/942/1026/1141/3113/3146/3485/3592/3593/3553/51561/3565/3567/3574/3718/3965
GO:0051806	BP	GO:0051806	entry into cell of other organism involved in symbiotic interaction	74	0.436053	1.75191	0.00010019	0.00242704	0.00187151	1945	tags=45%, list=23%, signal=35%	8519/3690/1803/2934/3678/4360/290/558/999/1500/3576/2621/10410/3956/4233/5819/10572/6510/857/30835/972/942/983/10332/23601/1380/1949/1969/3383/3693/3695/3949/3965
GO:0051828	BP	GO:0051828	entry into other organism involved in symbiotic interaction	74	0.436053	1.75191	0.00010019	0.00242704	0.00187151	1945	tags=45%, list=23%, signal=35%	8519/3690/1803/2934/3678/4360/290/558/999/1500/3576/2621/10410/3956/4233/5819/10572/6510/857/30835/972/942/983/10332/23601/1380/1949/1969/3383/3693/3695/3949/3965
GO:0097530	BP	GO:0097530	granulocyte migration	74	0.449699	1.80674	0.00010019	0.00242704	0.00187151	1866	tags=41%, list=22%, signal=32%	6347/5142/6348/414062/6280/3627/2920/23604/57580/6279/30817/728/3576/5175/7057/301/6367/6352/57126/972/1435/6373/1907/8288/23765/84818/3553/51561/3672/120425
GO:1902806	BP	GO:1902806	regulation of cell cycle G1/S phase transition	74	0.461199	1.85294	0.00010019	0.00242704	0.00187151	1647	tags=43%, list=19%, signal=35%	6347/493/8318/990/4582/5933/7015/199/1017/1019/1869/10457/3398/27085/5111/10769/7027/9510/301/7832/387695/995/983/1021/1026/1032/10106/10217/1543/79733/2146/2735
GO:0031497	BP	GO:0031497	chromatin assembly	76	0.458355	1.84582	0.00010021	0.00242704	0.00187151	2274	tags=51%, list=26%, signal=38%	55723/10036/8208/8365/64946/55839/55166/79682/387103/8349/8520/3070/54069/1058/2491/64105/91687/79019/79172/201254/3005/8348/440689/8347/3017/8357/126961/333932/8353/121504/8370/8366/3159/8091/23421/4171/4678/11339/23569
GO:0031960	BP	GO:0031960	response to corticosteroid	76	0.470525	1.89483	0.00010021	0.00242704	0.00187151	1909	tags=46%, list=22%, signal=36%	6678/133/8644/358/1490/54541/114907/7298/677/199/306/445/1277/153222/1978/2353/3490/5106/5111/21/301/10018/632/1026/8837/1536/1843/2022/2322/2852/3176/3291/3383/3485/687
GO:0006334	BP	GO:0006334	nucleosome assembly	71	0.453907	1.81691	0.00010022	0.00242704	0.00187151	2274	tags=51%, list=26%, signal=38%	55723/10036/8208/8365/64946/55839/55166/79682/387103/8349/8520/54069/1058/2491/64105/91687/79019/79172/201254/3005/8348/440689/8347/3017/8357/126961/333932/8353/121504/8370/8366/23421/4171/4678/11339/23569
GO:0031570	BP	GO:0031570	DNA integrity checkpoint	71	0.485938	1.94512	0.00010022	0.00242704	0.00187151	1496	tags=44%, list=17%, signal=36%	672/83990/8318/990/63967/4436/4582/4998/641/1017/81620/1763/51514/1869/146956/5111/10769/7027/90381/54962/7153/79968/84446/7832/8555/995/983/1026/1111/29980/79733
GO:0000776	CC	GO:0000776	kinetochore	70	0.463335	1.85162	0.000100231	0.00242704	0.00187151	2733	tags=60%, list=32%, signal=41%	699/81620/64946/55839/55166/79682/387103/4085/27085/79023/220134/54908/55055/11130/332/9184/23468/1058/2491/64105/79019/79172/201254/9793/23332/79980/6990/54821/23421/3835/11004/90417/9735/4751/83540/9985/151246/348235/221150/10615/57405/56155
GO:0000781	CC	GO:0000781	chromosome, telomeric region	66	0.448052	1.7842	0.000100231	0.00242704	0.00187151	1720	tags=42%, list=20%, signal=34%	8365/4173/4174/4436/4998/5888/7015/641/675/1017/64858/1763/2237/8520/4172/4175/4176/5111/9401/10189/23468/983/1111/11144/2146/121504/8370/8366
GO:0001890	BP	GO:0001890	placenta development	70	0.449278	1.79544	0.000100231	0.00242704	0.00187151	2408	tags=50%, list=28%, signal=36%	2034/133/639/677/100/1051/2057/3280/3696/3976/51294/5155/10733/9021/6696/8614/400629/22846/655/659/3491/1028/1050/1437/79733/2707/5654/3726/3856/4188/4311/7026/5333/5740/5764
GO:0005875	CC	GO:0005875	microtubule associated complex	75	0.453121	1.82297	0.000100231	0.00242704	0.00187151	1906	tags=47%, list=22%, signal=37%	79659/23046/3801/4210/57698/81569/7461/347240/4133/9053/332/388389/93233/55143/27185/201625/146754/6990/2009/115106/55142/54801/55559/93323/63971/56992/547/3835/26153/11004/24137/221458/3833/64837/89953
GO:0032946	BP	GO:0032946	positive regulation of mononuclear cell proliferation	75	0.453062	1.82273	0.000100231	0.00242704	0.00187151	1945	tags=48%, list=23%, signal=38%	604/11148/29126/958/3109/3115/3559/7099/100/199/923/3280/301/79915/6352/729230/30835/952/970/972/942/1026/1141/1435/3113/3146/3485/3592/3593/3553/51561/3565/3567/3574/3718/3965
GO:0042542	BP	GO:0042542	response to hydrogen peroxide	70	0.474291	1.8954	0.000100231	0.00242704	0.00187151	2352	tags=54%, list=27%, signal=40%	1545/388/358/2113/2534/7703/100/558/1277/1894/3043/3082/3162/4151/4233/4602/1728/5111/10280/6546/301/824/983/1843/2146/51022/3240/8807/3741/23135/9314/10276/8013/5074/80310/5159/65018/59338
GO:0061008	BP	GO:0061008	hepaticobiliary system development	66	0.45335	1.8053	0.000100231	0.00242704	0.00187151	1758	tags=45%, list=20%, signal=36%	7298/100/440/445/634/1051/10370/3280/3082/3162/4233/5106/5111/7049/7448/205/301/1050/1054/8837/1543/1628/123872/79733/2146/2735/2737/3077/3142/3157
GO:0097696	BP	GO:0097696	STAT cascade	66	0.534817	2.12971	0.000100231	0.00242704	0.00187151	1862	tags=53%, list=22%, signal=42%	6347/1545/83666/1950/958/2534/54625/6775/1436/2149/2261/3280/3976/9111/5175/9021/55620/6773/23568/602/857/6352/729230/1437/2322/2690/3587/3592/3593/51561/133396/3565/3567/3575/3718
GO:2000045	BP	GO:2000045	regulation of G1/S transition of mitotic cell cycle	70	0.456911	1.82595	0.000100231	0.00242704	0.00187151	1541	tags=41%, list=18%, signal=34%	6347/8318/990/4582/5933/7015/199/1017/1019/1869/10457/3398/27085/5111/10769/7027/9510/301/7832/995/983/1021/1026/1032/10106/10217/1543/79733/2146
GO:0000779	CC	GO:0000779	condensed chromosome, centromeric region	67	0.460434	1.83549	0.000100251	0.00242704	0.00187151	2733	tags=60%, list=32%, signal=41%	699/81620/1051/64946/55839/79682/387103/4085/79023/220134/54908/55055/11130/332/9184/1058/64105/79019/79172/201254/9793/23332/79980/6990/54821/23421/11004/90417/9735/23310/64151/4751/83540/9985/151246/348235/221150/10615/57405/56155
GO:0051384	BP	GO:0051384	response to glucocorticoid	67	0.444399	1.77157	0.000100251	0.00242704	0.00187151	1909	tags=43%, list=22%, signal=34%	6678/133/358/54541/114907/7298/677/199/306/445/153222/1978/2353/3490/5106/5111/21/301/10018/632/1026/8837/1843/2322/3176/3291/3383/3485/687
GO:0072376	BP	GO:0072376	protein activation cascade	67	0.45997	1.83364	0.000100251	0.00242704	0.00187151	1819	tags=40%, list=21%, signal=32%	2162/3075/5627/2/51279/716/717/718/720/721/728/5199/2161/3543/710/28526/11326/7448/727/1380/2152/2192/2815/3493/3494/3514/3553
GO:0005088	MF	GO:0005088	Ras guanyl-nucleotide exchange factor activity	68	0.469297	1.87296	0.000100261	0.00242704	0.00187151	3234	tags=68%, list=37%, signal=43%	54453/50650/1950/57480/9467/6764/23263/57580/25780/55701/139818/1894/221472/6453/8997/84033/26030/153020/23179/9828/26084/7984/163259/23258/10160/121512/23101/10276/5866/29098/10411/221002/5923/1104/221178/100128327/7410/11214/55160/9826/27237/115557/389337/84904/9459/8874
GO:0001889	BP	GO:0001889	liver development	65	0.459071	1.82525	0.000100271	0.00242704	0.00187151	1758	tags=46%, list=20%, signal=37%	7298/100/440/445/634/1051/10370/3280/3082/3162/4233/5106/5111/7049/7448/205/301/1050/1054/8837/1543/1628/123872/79733/2146/2735/2737/3077/3142/3157
GO:0002262	BP	GO:0002262	myeloid cell homeostasis	65	0.461306	1.83413	0.000100271	0.00242704	0.00187151	1333	tags=37%, list=15%, signal=31%	5142/272/604/2034/2113/4254/677/558/28996/3162/3398/3624/4151/54892/23657/7049/7422/91/92/301/10018/729230/1021/1054
GO:0002576	BP	GO:0002576	platelet degranulation	65	0.479979	1.90838	0.000100271	0.00242704	0.00187151	1423	tags=37%, list=16%, signal=31%	2162/3959/5627/6414/6678/1950/3690/2/2335/2621/3082/5154/5155/5175/710/8407/7057/7078/7273/7422/87/135228/928/1521
GO:0002761	BP	GO:0002761	regulation of myeloid leukocyte differentiation	65	0.462866	1.84033	0.000100271	0.00242704	0.00187151	2817	tags=58%, list=33%, signal=40%	6348/9290/3665/4254/7099/677/760/634/1051/2353/3398/3624/3976/4830/4853/128506/632/972/1021/51208/1435/2124/2200/27086/10272/3593/51561/3565/3567/3623/10234/9935/4763/4920/7098/7124/54209/10221
GO:0043524	BP	GO:0043524	negative regulation of neuron apoptotic process	65	0.449856	1.78861	0.000100271	0.00242704	0.00187151	1211	tags=34%, list=14%, signal=29%	6347/1524/4914/2534/4436/8829/7015/558/728/1051/2065/2149/28996/3162/6453/4035/7516/408/409/627/80823/7832
GO:0071621	BP	GO:0071621	granulocyte chemotaxis	65	0.472739	1.87959	0.000100271	0.00242704	0.00187151	1866	tags=42%, list=22%, signal=33%	6347/5142/6348/414062/6280/3627/2920/23604/57580/6279/30817/728/3576/7057/301/6367/6352/972/1435/6373/1907/23765/84818/3553/51561/3672/120425
GO:0072562	CC	GO:0072562	blood microparticle	65	0.471329	1.87398	0.000100271	0.00242704	0.00187151	1857	tags=42%, list=22%, signal=33%	2162/3959/3075/5627/2934/2/716/718/720/721/2335/3043/710/7448/51129/8542/10518/2022/3045/3240/3250/3306/3310/3493/3494/3514/3700
GO:0000725	BP	GO:0000725	recombinational repair	64	0.501666	1.99039	0.000100321	0.00242704	0.00187151	2519	tags=59%, list=29%, signal=42%	84515/672/8318/2187/51659/4173/4174/5888/8438/79000/641/675/2237/84296/4172/4175/4176/55010/10721/10213/5889/9401/116028/7516/1111/11144/63979/4171/253714/79035/10635/5890/25788/5932/9985/6118/6119/25939
GO:0007259	BP	GO:0007259	JAK-STAT cascade	64	0.536548	2.12879	0.000100321	0.00242704	0.00187151	1862	tags=53%, list=22%, signal=42%	6347/1545/83666/1950/958/2534/54625/6775/1436/2149/2261/3280/3976/9111/5175/9021/55620/6773/23568/602/857/6352/729230/1437/2322/2690/3587/3592/3593/51561/133396/3565/3567/3718
GO:0000724	BP	GO:0000724	double-strand break repair via homologous recombination	63	0.507434	2.01032	0.000100351	0.00242704	0.00187151	2519	tags=60%, list=29%, signal=43%	84515/672/8318/2187/51659/4173/4174/5888/8438/79000/641/675/2237/84296/4172/4175/4176/55010/10721/10213/5889/9401/116028/7516/1111/11144/63979/4171/253714/79035/10635/5890/25788/5932/9985/6118/6119/25939
GO:0002831	BP	GO:0002831	regulation of response to biotic stimulus	61	0.462861	1.82792	0.000100371	0.00242704	0.00187151	1821	tags=44%, list=21%, signal=35%	151636/83666/55601/340061/29126/3434/3559/634/79132/10875/51191/5819/54765/60489/384/4064/10666/23586/27086/2896/3146/3329/5654/3592/3593/3553/51561
GO:0006690	BP	GO:0006690	icosanoid metabolic process	62	0.4597	1.81786	0.000100371	0.00242704	0.00187151	2406	tags=52%, list=28%, signal=37%	1545/1646/8605/8644/11343/5742/1109/246/4051/2678/240/241/301/972/1543/1548/1565/29785/747/221955/1907/2171/2679/2686/3248/3553/5445/10394/5730/9536/5740/22949
GO:0007189	BP	GO:0007189	adenylate cyclase-activating G protein-coupled receptor signaling pathway	61	0.465732	1.83925	0.000100371	0.00242704	0.00187151	3256	tags=75%, list=38%, signal=47%	19/133/493/3627/30817/10203/577/79924/148/6373/8811/2774/54331/2852/2827/8477/5144/5732/5734/5739/6915/7253/196883/112/113/115/575/576/283383/2015/976/10149/221188/84873/22859/23266/64123/147/146/150/151/152/154/11214/333/57561
GO:0000777	CC	GO:0000777	condensed chromosome kinetochore	60	0.474332	1.87053	0.000100432	0.00242704	0.00187151	2733	tags=62%, list=32%, signal=42%	699/81620/64946/55839/79682/387103/4085/79023/220134/54908/55055/11130/332/9184/1058/64105/79019/79172/201254/9793/23332/79980/6990/54821/23421/11004/90417/9735/4751/83540/9985/151246/348235/221150/10615/57405/56155
GO:1903900	BP	GO:1903900	regulation of viral life cycle	59	0.479636	1.88927	0.000100492	0.00242704	0.00187151	2822	tags=59%, list=33%, signal=40%	8519/4940/2934/3434/5091/91543/164668/3576/3429/24138/10410/3669/3956/4599/5819/2494/4938/6590/7153/140564/60489/6352/972/8468/8091/27074/3965/11043/8638/5629/5806/9126/7113/7124/11074
GO:1904892	BP	GO:1904892	regulation of STAT cascade	58	0.525844	2.06784	0.000100513	0.00242704	0.00187151	1862	tags=53%, list=22%, signal=42%	1545/83666/1950/958/2534/54625/8851/1436/2149/2261/3280/3976/5175/9021/55620/23568/602/857/6352/1437/2322/2690/3587/3592/3593/51561/133396/3565/3567/3575/3718
GO:0004896	MF	GO:0004896	cytokine receptor activity	56	0.522804	2.04656	0.000100533	0.00242704	0.00187151	1828	tags=52%, list=21%, signal=41%	1524/132014/3597/3559/1439/2057/3601/3560/3563/3566/729230/960/972/2152/2322/2675/2690/3459/3587/3590/3593/23765/84818/8809/8807/9173/3561/133396/3575
GO:0046425	BP	GO:0046425	regulation of JAK-STAT cascade	56	0.52766	2.06557	0.000100533	0.00242704	0.00187151	1862	tags=54%, list=22%, signal=42%	1545/83666/1950/958/2534/54625/8851/1436/2149/2261/3280/3976/5175/9021/55620/23568/602/857/6352/1437/2322/2690/3587/3592/3593/51561/133396/3565/3567/3718
GO:0004386	MF	GO:0004386	helicase activity	57	0.640702	2.51367	0.000100563	0.00242704	0.00187151	1567	tags=61%, list=18%, signal=51%	91351/55601/85441/84515/83990/8318/9837/51659/4173/4174/89797/5888/8438/5983/641/1107/79132/1763/84296/3070/4172/4175/4176/10721/56852/9401/5982/5984/5985/10212/23586/165545/79075/54821/57697
GO:0014812	BP	GO:0014812	muscle cell migration	52	0.478545	1.85639	0.000100806	0.00242704	0.00187151	2356	tags=54%, list=27%, signal=39%	57175/3690/8829/7015/1636/199/3486/3488/4035/5031/5154/5155/6653/7448/9510/301/6352/780/9732/84466/65009/10276/8013/5058/55742/80310/5159/51177
GO:0015399	MF	GO:0015399	primary active transmembrane transporter activity	52	0.559413	2.1701	0.000100806	0.00242704	0.00187151	3315	tags=90%, list=38%, signal=56%	9619/19/5244/493/10350/9429/478/10396/26154/21/8714/225/491/516/245973/534/10440/10349/79963/154664/20/23461/23460/10347/23456/23457/85320/368/215/5826/64240/477/480/482/487/489/492/9914/506/514/518/515/92270/527/523/51382/538
GO:0015405	MF	GO:0015405	P-P-bond-hydrolysis-driven transmembrane transporter activity	52	0.559413	2.1701	0.000100806	0.00242704	0.00187151	3315	tags=90%, list=38%, signal=56%	9619/19/5244/493/10350/9429/478/10396/26154/21/8714/225/491/516/245973/534/10440/10349/79963/154664/20/23461/23460/10347/23456/23457/85320/368/215/5826/64240/477/480/482/487/489/492/9914/506/514/518/515/92270/527/523/51382/538
GO:0090100	BP	GO:0090100	positive regulation of transmembrane receptor protein serine/threonine kinase signaling pathway	52	0.507929	1.97038	0.000100806	0.00242704	0.00187151	1835	tags=52%, list=21%, signal=41%	650/83729/8516/94/10370/10755/3280/28996/3624/7041/7049/7057/90/91/92/93/655/659/3491/1028/286204/1601/2022/2297/3077/3623/3626
GO:1902106	BP	GO:1902106	negative regulation of leukocyte differentiation	52	0.473958	1.8386	0.000100806	0.00242704	0.00187151	2207	tags=52%, list=26%, signal=39%	6348/604/2213/9290/7099/634/10875/3398/3566/3624/3902/4830/301/972/1021/51208/2200/10272/2737/3142/3146/3565/3623/3718/10234/9935/4763
GO:0003697	MF	GO:0003697	single-stranded DNA binding	51	0.519013	2.00873	0.000100867	0.00242704	0.00187151	2519	tags=61%, list=29%, signal=43%	84515/8318/55388/4173/4174/4436/5888/641/675/4172/4175/4176/55247/4830/5422/5557/56852/10592/170463/301/11144/3146/3329/4171/79035/10635/5890/5932/6118/6119/25939
GO:0044786	BP	GO:0044786	cell cycle DNA replication	51	0.600323	2.32342	0.000100867	0.00242704	0.00187151	2637	tags=76%, list=31%, signal=53%	604/8318/9837/4173/4174/23649/5888/5983/675/81620/1763/2237/3978/4172/4175/4176/5111/5422/10714/5557/5558/5982/5984/5985/54962/79915/10926/29980/79733/26271/51053/4171/2956/5424/5427/6118/6119/7884/9126
GO:0060333	BP	GO:0060333	interferon-gamma-mediated signaling pathway	51	0.52198	2.02021	0.000100867	0.00242704	0.00187151	2877	tags=67%, list=33%, signal=45%	4940/83666/4261/3115/3119/3122/3127/3665/4939/54625/2634/3117/4502/9111/10062/4938/9021/960/3113/3120/3123/3134/3383/3459/3662/10379/345611/84166/8638/5724/8651/11074/7294/7412
GO:0000784	CC	GO:0000784	nuclear chromosome, telomeric region	50	0.478819	1.84764	0.000100959	0.00242704	0.00187151	1720	tags=44%, list=20%, signal=35%	8365/4173/4174/4436/4998/5888/7015/675/64858/1763/2237/8520/4172/4175/4176/5111/10189/23468/983/121504/8370/8366
GO:0006275	BP	GO:0006275	regulation of DNA replication	50	0.554206	2.13853	0.000100959	0.00242704	0.00187151	1790	tags=56%, list=21%, signal=45%	604/157570/990/5983/94/641/675/27101/1017/81620/1763/5111/5982/5984/5985/90381/54962/79915/55704/983/10926/29980/79075/79733/26271/2735/51053/3399
GO:0042626	MF	GO:0042626	ATPase activity, coupled to transmembrane movement of substances	50	0.569526	2.19765	0.000100959	0.00242704	0.00187151	3315	tags=92%, list=38%, signal=57%	9619/19/5244/493/10350/9429/478/10396/26154/21/8714/225/491/516/245973/534/10349/79963/154664/20/23461/23460/10347/23456/23457/85320/368/215/5826/64240/477/480/482/487/489/492/9914/506/514/518/515/92270/527/523/51382/538
GO:0043492	MF	GO:0043492	ATPase activity, coupled to movement of substances	50	0.569526	2.19765	0.000100959	0.00242704	0.00187151	3315	tags=92%, list=38%, signal=57%	9619/19/5244/493/10350/9429/478/10396/26154/21/8714/225/491/516/245973/534/10349/79963/154664/20/23461/23460/10347/23456/23457/85320/368/215/5826/64240/477/480/482/487/489/492/9914/506/514/518/515/92270/527/523/51382/538
GO:0031091	CC	GO:0031091	platelet alpha granule	49	0.501009	1.93002	0.000101041	0.00242704	0.00187151	1309	tags=39%, list=15%, signal=33%	2162/5627/6678/1950/3690/5270/2/2335/2621/3082/5154/5155/5175/710/7057/7422/87/135228/928
GO:0034340	BP	GO:0034340	response to type I interferon	49	0.566598	2.18268	0.000101041	0.00242704	0.00187151	1029	tags=41%, list=12%, signal=36%	3437/8519/4940/4600/2537/3434/3665/4939/91543/6472/2634/3429/3433/10410/3669/4599/4938/6773/11274/54739
GO:0019079	BP	GO:0019079	viral genome replication	48	0.54493	2.0925	0.000101082	0.00242704	0.00187151	1369	tags=46%, list=16%, signal=39%	6347/8519/4940/3434/91543/164668/3576/2621/3429/24138/10410/3669/4599/2494/4938/6590/7153/140564/60489/6352/30835/10332
GO:0032392	BP	GO:0032392	DNA geometric change	47	0.645012	2.47049	0.000101194	0.00242704	0.00187151	1757	tags=66%, list=20%, signal=53%	84515/83990/8318/9837/51659/4173/4174/89797/5888/8438/5983/641/1107/1763/84296/4172/4175/4176/10721/56852/9401/5982/5984/5985/7153/301/165545/79075/54821/3159/3146
GO:0033260	BP	GO:0033260	nuclear DNA replication	46	0.619971	2.36867	0.000101194	0.00242704	0.00187151	973	tags=54%, list=11%, signal=48%	604/8318/9837/4173/4174/23649/5888/5983/675/81620/1763/2237/3978/4172/4175/4176/5111/5422/10714/5557/5558/5982/5984/5985/54962
GO:0044774	BP	GO:0044774	mitotic DNA integrity checkpoint	47	0.509076	1.94984	0.000101194	0.00242704	0.00187151	1496	tags=47%, list=17%, signal=39%	990/63967/4436/4582/4998/641/1017/1869/146956/5111/10769/7027/90381/54962/7153/84446/7832/995/983/1026/29980/79733
GO:0060337	BP	GO:0060337	type I interferon signaling pathway	47	0.561197	2.14947	0.000101194	0.00242704	0.00187151	1029	tags=40%, list=12%, signal=36%	3437/8519/4940/4600/2537/3434/3665/4939/91543/2634/3429/3433/10410/3669/4599/4938/6773/11274/54739
GO:0071357	BP	GO:0071357	cellular response to type I interferon	47	0.561197	2.14947	0.000101194	0.00242704	0.00187151	1029	tags=40%, list=12%, signal=36%	3437/8519/4940/4600/2537/3434/3665/4939/91543/2634/3429/3433/10410/3669/4599/4938/6773/11274/54739
GO:0061097	BP	GO:0061097	regulation of protein tyrosine kinase activity	45	0.526995	2.00656	0.000101245	0.00242704	0.00187151	1282	tags=47%, list=15%, signal=40%	1950/9467/2534/1636/84632/1436/1742/1942/2043/2065/2621/54892/5155/5649/80725/148/389658/627/857/868/6352
GO:1904894	BP	GO:1904894	positive regulation of STAT cascade	45	0.568997	2.16649	0.000101245	0.00242704	0.00187151	1828	tags=58%, list=21%, signal=46%	1545/83666/958/2534/54625/1436/2149/2261/3280/3976/5175/9021/55620/23568/6352/1437/2322/2690/3587/3592/3593/51561/133396/3565/3567/3575
GO:0046427	BP	GO:0046427	positive regulation of JAK-STAT cascade	44	0.564385	2.13962	0.00010144	0.00242704	0.00187151	1826	tags=57%, list=21%, signal=45%	1545/83666/958/2534/54625/1436/2149/2261/3280/3976/5175/9021/55620/23568/6352/1437/2322/2690/3587/3592/3593/51561/133396/3565/3567
GO:0032508	BP	GO:0032508	DNA duplex unwinding	43	0.660721	2.49797	0.000101543	0.00242704	0.00187151	1523	tags=65%, list=18%, signal=54%	84515/83990/8318/9837/51659/4173/4174/89797/5888/5983/641/1107/1763/84296/4172/4175/4176/10721/56852/9401/5982/5984/5985/7153/301/165545/79075/54821
GO:0007260	BP	GO:0007260	tyrosine phosphorylation of STAT protein	41	0.544875	2.04512	0.00010176	0.00242704	0.00187151	1862	tags=56%, list=22%, signal=44%	83666/958/2534/54625/1436/2261/3280/3976/5175/9021/55620/23568/857/6352/1437/2322/2690/3592/3593/51561/133396/3565/3718
GO:0005657	CC	GO:0005657	replication fork	40	0.635219	2.37672	0.000101792	0.00242704	0.00187151	1030	tags=57%, list=12%, signal=51%	604/8318/51659/55388/23649/5983/641/84296/4172/5111/5422/10714/5557/5558/56852/5889/5982/5984/5985/54962/29128/11169/7516
GO:0045069	BP	GO:0045069	regulation of viral genome replication	40	0.538864	2.01621	0.000101792	0.00242704	0.00187151	1282	tags=45%, list=15%, signal=38%	8519/4940/3434/91543/164668/3576/3429/24138/10410/3669/4599/2494/4938/6590/7153/140564/60489/6352
GO:0005518	MF	GO:0005518	collagen binding	39	0.572377	2.13692	0.000101947	0.00242704	0.00187151	1448	tags=51%, list=17%, signal=43%	871/84168/6678/9806/4921/2335/4318/5154/5155/7045/7057/7448/165/114897/960/1690/7373/1513/1520/780
GO:0031902	CC	GO:0031902	late endosome membrane	39	0.533818	1.99296	0.000101947	0.00242704	0.00187151	1050	tags=38%, list=12%, signal=34%	968/4914/388/3109/3122/3127/8938/3108/10410/6490/338382/6556/285195/23555/57406
GO:0042509	BP	GO:0042509	regulation of tyrosine phosphorylation of STAT protein	39	0.55258	2.06301	0.000101947	0.00242704	0.00187151	1825	tags=56%, list=21%, signal=45%	83666/958/2534/54625/1436/2261/3280/3976/5175/9021/55620/23568/857/6352/1437/2322/2690/3592/3593/51561/133396/3565
GO:0031100	BP	GO:0031100	animal organ regeneration	38	0.584577	2.17473	0.000101968	0.00242704	0.00187151	1742	tags=58%, list=20%, signal=46%	133/4837/7298/306/558/728/1019/1051/6387/2621/3082/3162/5111/7049/7448/983/1026/2146/2322/2735/2737/3077
GO:0097327	BP	GO:0097327	response to antineoplastic agent	37	0.584906	2.16574	0.000102239	0.00242704	0.00187151	790	tags=43%, list=9%, signal=39%	358/672/54541/1719/114907/5888/440/445/641/999/1019/1978/3162/5106/5111/5155
GO:0003678	MF	GO:0003678	DNA helicase activity	36	0.719841	2.66004	0.000102249	0.00242704	0.00187151	852	tags=64%, list=10%, signal=58%	84515/83990/8318/9837/51659/4173/4174/89797/5888/5983/641/1107/1763/84296/4172/4175/4176/10721/56852/9401/5982/5984/5985
GO:0031093	CC	GO:0031093	platelet alpha granule lumen	36	0.557155	2.05886	0.000102249	0.00242704	0.00187151	1061	tags=39%, list=12%, signal=34%	2162/5627/6678/1950/2/2335/2621/3082/5154/5155/710/7057/7422/87
GO:0042531	BP	GO:0042531	positive regulation of tyrosine phosphorylation of STAT protein	36	0.576704	2.1311	0.000102249	0.00242704	0.00187151	1825	tags=58%, list=21%, signal=46%	83666/958/2534/54625/1436/2261/3280/3976/5175/9021/55620/23568/6352/1437/2322/2690/3592/3593/51561/133396/3565
GO:1902554	CC	GO:1902554	serine/threonine protein kinase complex	36	0.556162	2.05519	0.000102249	0.00242704	0.00187151	1359	tags=53%, list=16%, signal=45%	9134/94/1017/1019/8851/1163/24138/5111/90/91/92/93/901/79616/983/1021/1026/1032/1164
GO:0033273	BP	GO:0033273	response to vitamin	35	0.534078	1.96364	0.000102365	0.00242704	0.00187151	1430	tags=46%, list=17%, signal=38%	6678/83990/3627/2934/7298/100/360/1277/2348/2621/6696/8614/632/655/1032/1543
GO:0061098	BP	GO:0061098	positive regulation of protein tyrosine kinase activity	35	0.56912	2.09248	0.000102365	0.00242704	0.00187151	1282	tags=51%, list=15%, signal=44%	1950/2534/1636/84632/1436/1742/1942/2043/2065/2621/54892/5155/5649/80725/148/389658/627/6352
GO:0008094	MF	GO:0008094	DNA-dependent ATPase activity	33	0.61793	2.253	0.00010269	0.00242962	0.0018735	1523	tags=64%, list=18%, signal=53%	4174/4436/5888/8438/5983/641/1107/1763/4175/4176/10721/56852/5889/5982/5984/5985/7153/7516/11144/79075/54821
GO:0006270	BP	GO:0006270	DNA replication initiation	28	0.729302	2.58295	0.000104069	0.00245704	0.00189464	970	tags=64%, list=11%, signal=57%	9134/8318/990/55388/4173/4174/4998/23594/23649/1017/81620/4172/4175/4176/5422/5557/5558/90381
GO:0019748	BP	GO:0019748	secondary metabolic process	26	0.643872	2.24158	0.000104921	0.00247193	0.00190613	1447	tags=58%, list=17%, signal=48%	1545/1645/1646/8644/1109/1491/10755/6490/23657/56898/102724560/1543/1548/1565/1638
GO:0008009	MF	GO:0008009	chemokine activity	25	0.599391	2.07185	0.000105296	0.00247557	0.00190893	1425	tags=48%, list=17%, signal=40%	6347/6348/414062/3627/2920/6387/3576/387695/727/6367/6352/6373
GO:0003684	MF	GO:0003684	damaged DNA binding	24	0.62783	2.14751	0.000106045	0.00248273	0.00191445	2493	tags=83%, list=29%, signal=59%	672/4436/79000/641/64858/2237/55247/5111/10721/56852/9401/7374/2189/3146/2956/5424/5810/5932/6118/6119
GO:0046686	BP	GO:0046686	response to cadmium ion	24	0.606354	2.07405	0.000106045	0.00248273	0.00191445	786	tags=46%, list=9%, signal=42%	6678/8644/2934/7015/1841/2353/3162/4318/4502/4521/5111
GO:0022616	BP	GO:0022616	DNA strand elongation	22	0.839894	2.81524	0.000107273	0.00250625	0.00193259	858	tags=82%, list=10%, signal=74%	9837/51659/64785/4173/5983/7015/64858/1763/2237/84296/3978/4172/4176/5111/5422/10714/5984/10535
GO:0032201	BP	GO:0032201	telomere maintenance via semi-conservative replication	20	0.662416	2.17488	0.000108272	0.00251893	0.00194237	852	tags=60%, list=10%, signal=54%	23649/5983/1763/2237/5111/5422/10714/5557/5558/5982/5984/5985
GO:0000083	BP	GO:0000083	regulation of transcription involved in G1/S transition of mitotic cell cycle	18	0.746922	2.38829	0.000109975	0.00251893	0.00194237	961	tags=67%, list=11%, signal=59%	8318/990/1719/4998/6241/7298/81620/1869/3398/5111/5422/7027
GO:0006271	BP	GO:0006271	DNA strand elongation involved in DNA replication	18	0.865843	2.76854	0.000109975	0.00251893	0.00194237	858	tags=89%, list=10%, signal=80%	9837/51659/64785/4173/5983/1763/2237/84296/3978/4172/4176/5111/5422/10714/5984/10535
GO:0003688	MF	GO:0003688	DNA replication origin binding	17	0.77248	2.43768	0.000110742	0.00251893	0.00194237	812	tags=71%, list=9%, signal=64%	84515/8318/990/55388/4173/4174/4998/23594/4172/4175/4176/5422
GO:0004003	MF	GO:0004003	ATP-dependent DNA helicase activity	17	0.750276	2.36761	0.000110742	0.00251893	0.00194237	852	tags=71%, list=10%, signal=64%	4174/5888/5983/1107/1763/4175/4176/10721/56852/5982/5984/5985
GO:0008026	MF	GO:0008026	ATP-dependent helicase activity	17	0.750276	2.36761	0.000110742	0.00251893	0.00194237	852	tags=71%, list=10%, signal=64%	4174/5888/5983/1107/1763/4175/4176/10721/56852/5982/5984/5985
GO:0032371	BP	GO:0032371	regulation of sterol transport	17	0.689329	2.17528	0.000110742	0.00251893	0.00194237	1044	tags=53%, list=12%, signal=47%	9619/19/1950/5244/1071/4035/10062/158219/26154
GO:0032374	BP	GO:0032374	regulation of cholesterol transport	17	0.689329	2.17528	0.000110742	0.00251893	0.00194237	1044	tags=53%, list=12%, signal=47%	9619/19/1950/5244/1071/4035/10062/158219/26154
GO:0042605	MF	GO:0042605	peptide antigen binding	17	0.68418	2.15904	0.000110742	0.00251893	0.00194237	1753	tags=71%, list=20%, signal=56%	8140/23428/3115/3119/3122/3127/3117/30835/10332/3113/3123/3134
GO:0044319	BP	GO:0044319	wound healing, spreading of cells	17	0.698101	2.20297	0.000110742	0.00251893	0.00194237	1448	tags=71%, list=17%, signal=59%	3678/94/84962/634/1839/90102/389/3491/960/23332/1289/780
GO:0070035	MF	GO:0070035	purine NTP-dependent helicase activity	17	0.750276	2.36761	0.000110742	0.00251893	0.00194237	852	tags=71%, list=10%, signal=64%	4174/5888/5983/1107/1763/4175/4176/10721/56852/5982/5984/5985
GO:0090504	BP	GO:0090504	epiboly	17	0.698101	2.20297	0.000110742	0.00251893	0.00194237	1448	tags=71%, list=17%, signal=59%	3678/94/84962/634/1839/90102/389/3491/960/23332/1289/780
GO:0090505	BP	GO:0090505	epiboly involved in wound healing	17	0.698101	2.20297	0.000110742	0.00251893	0.00194237	1448	tags=71%, list=17%, signal=59%	3678/94/84962/634/1839/90102/389/3491/960/23332/1289/780
GO:0017116	MF	GO:0017116	single-stranded DNA-dependent ATP-dependent DNA helicase activity	16	0.739555	2.30225	0.00011147	0.00252523	0.00194723	852	tags=69%, list=10%, signal=62%	4174/5888/5983/1763/4175/4176/10721/56852/5982/5984/5985
GO:0043142	MF	GO:0043142	single-stranded DNA-dependent ATPase activity	16	0.739555	2.30225	0.00011147	0.00252523	0.00194723	852	tags=69%, list=10%, signal=62%	4174/5888/5983/1763/4175/4176/10721/56852/5982/5984/5985
GO:0015949	BP	GO:0015949	nucleobase-containing small molecule interconversion	14	0.722295	2.17384	0.000113856	0.00257407	0.00198489	1096	tags=64%, list=13%, signal=56%	6241/7298/1503/1841/1854/4830/4833/6240/205
GO:0008207	BP	GO:0008207	C21-steroid hormone metabolic process	13	0.76758	2.26488	0.0001153	0.00258065	0.00198996	489	tags=54%, list=6%, signal=51%	1645/1646/133/8644/650/1109/1583
GO:0042613	CC	GO:0042613	MHC class II protein complex	13	0.742471	2.19079	0.0001153	0.00258065	0.00198996	1751	tags=85%, list=20%, signal=68%	3109/3115/3119/3122/3127/3108/3117/972/3113/3120/3123
GO:0071556	CC	GO:0071556	integral component of lumenal side of endoplasmic reticulum membrane	13	0.703928	2.07707	0.0001153	0.00258065	0.00198996	1753	tags=77%, list=20%, signal=61%	3115/3119/3122/3127/3117/972/3113/3120/3123/3134
GO:0098553	CC	GO:0098553	lumenal side of endoplasmic reticulum membrane	13	0.703928	2.07707	0.0001153	0.00258065	0.00198996	1753	tags=77%, list=20%, signal=61%	3115/3119/3122/3127/3117/972/3113/3120/3123/3134
GO:1902969	BP	GO:1902969	mitotic DNA replication	13	0.806907	2.38092	0.0001153	0.00258065	0.00198996	812	tags=77%, list=9%, signal=70%	604/8318/9837/4173/5888/675/3978/4172/4175/5422
GO:0010874	BP	GO:0010874	regulation of cholesterol efflux	12	0.762112	2.20385	0.000116279	0.00259219	0.00199886	1044	tags=67%, list=12%, signal=59%	9619/19/1950/1071/4035/10062/158219/26154
GO:0035455	BP	GO:0035455	response to interferon-alpha	12	0.761955	2.2034	0.000116279	0.00259219	0.00199886	622	tags=58%, list=7%, signal=54%	3437/8519/4600/558/2621/3433/10410
GO:0000727	BP	GO:0000727	double-strand break repair via break-induced replication	11	0.793997	2.24531	0.000117509	0.0026144	0.00201598	706	tags=73%, list=8%, signal=67%	8318/51659/4173/4174/84296/4172/4175/4176
GO:0043138	MF	GO:0043138	3'-5' DNA helicase activity	10	0.84204	2.3186	0.000119603	0.00265571	0.00204784	848	tags=90%, list=10%, signal=81%	8318/9837/51659/4174/641/84296/4175/4176/9401
GO:0002468	BP	GO:0002468	dendritic cell antigen processing and presentation	9	0.762093	2.03933	0.00012222	0.00268715	0.00207208	1368	tags=78%, list=16%, signal=66%	968/2213/10875/6556/7057/972/50856
GO:0032373	BP	GO:0032373	positive regulation of sterol transport	9	0.764184	2.04492	0.00012222	0.00268715	0.00207208	1044	tags=67%, list=12%, signal=59%	9619/19/5244/4035/10062/26154
GO:0032376	BP	GO:0032376	positive regulation of cholesterol transport	9	0.764184	2.04492	0.00012222	0.00268715	0.00207208	1044	tags=67%, list=12%, signal=59%	9619/19/5244/4035/10062/26154
GO:0042448	BP	GO:0042448	progesterone metabolic process	9	0.799624	2.13976	0.00012222	0.00268715	0.00207208	353	tags=56%, list=4%, signal=53%	1645/1646/133/8644/1109
GO:2000425	BP	GO:2000425	regulation of apoptotic cell clearance	9	0.767942	2.05498	0.00012222	0.00268715	0.00207208	410	tags=67%, list=5%, signal=64%	6347/246/717/718/720/721
GO:1902644	BP	GO:1902644	tertiary alcohol metabolic process	8	0.867044	2.23679	0.000125502	0.00275391	0.00212356	489	tags=75%, list=6%, signal=71%	1645/1646/8644/650/1109/1583
GO:0030647	BP	GO:0030647	aminoglycoside antibiotic metabolic process	6	0.854259	2.01119	0.000133529	0.00292432	0.00225496	353	tags=67%, list=4%, signal=64%	1645/1646/8644/1109
GO:0005658	CC	GO:0005658	alpha DNA polymerase:primase complex	5	0.905137	2.01303	0.000138408	0.00299599	0.00231023	823	tags=100%, list=10%, signal=91%	23649/4172/5422/5557/5558
GO:0006273	BP	GO:0006273	lagging strand elongation	5	0.901079	2.004	0.000138408	0.00299599	0.00231023	858	tags=100%, list=10%, signal=90%	1763/2237/3978/5422/10535
GO:0019864	MF	GO:0019864	IgG binding	5	0.891342	1.98235	0.000138408	0.00299599	0.00231023	549	tags=80%, list=6%, signal=75%	2217/2212/2213/9103
GO:0030638	BP	GO:0030638	polyketide metabolic process	5	0.903971	2.01044	0.000138408	0.00299599	0.00231023	353	tags=80%, list=4%, signal=77%	1645/1646/8644/1109
GO:0044597	BP	GO:0044597	daunorubicin metabolic process	5	0.903971	2.01044	0.000138408	0.00299599	0.00231023	353	tags=80%, list=4%, signal=77%	1645/1646/8644/1109
GO:0044598	BP	GO:0044598	doxorubicin metabolic process	5	0.903971	2.01044	0.000138408	0.00299599	0.00231023	353	tags=80%, list=4%, signal=77%	1645/1646/8644/1109
GO:0006553	BP	GO:0006553	lysine metabolic process	4	0.919882	1.89907	0.000146757	0.00314627	0.00242612	119	tags=75%, list=1%, signal=74%	501/51268/10157
GO:0006554	BP	GO:0006554	lysine catabolic process	4	0.919882	1.89907	0.000146757	0.00314627	0.00242612	119	tags=75%, list=1%, signal=74%	501/51268/10157
GO:0009753	BP	GO:0009753	response to jasmonic acid	4	0.959532	1.98093	0.000146757	0.00314627	0.00242612	353	tags=100%, list=4%, signal=96%	1645/1646/8644/1109
GO:0047086	MF	GO:0047086	ketosteroid monooxygenase activity	4	0.959532	1.98093	0.000146757	0.00314627	0.00242612	353	tags=100%, list=4%, signal=96%	1645/1646/8644/1109
GO:0071395	BP	GO:0071395	cellular response to jasmonic acid stimulus	4	0.959532	1.98093	0.000146757	0.00314627	0.00242612	353	tags=100%, list=4%, signal=96%	1645/1646/8644/1109
GO:0018636	MF	GO:0018636	phenanthrene 9,10-monooxygenase activity	3	0.986087	1.87758	0.000153421	0.00328286	0.00253144	123	tags=100%, list=1%, signal=99%	1645/1646/8644
GO:0000003	BP	GO:0000003	reproduction	579	0.310973	1.35566	0.00019998	0.00389433	0.00300295	2459	tags=36%, list=29%, signal=28%	2013/84168/6414/604/1588/2034/84515/4914/26471/9088/8605/10863/133/8644/55723/493/83990/9134/993/8528/55840/2113/2177/3678/4254/23764/4436/23397/639/5888/8438/5270/285590/144195/677/1636/100/10566/558/675/699/1017/1051/79846/10370/1307/1299/153222/1393/1869/146956/2057/2119/9156/2353/2678/3280/3488/3490/3566/3624/3696/8997/3976/4036/84930/4318/84057/55706/5819/4861/4521/51294/5111/8654/5155/10733…
GO:0000323	CC	GO:0000323	lytic vacuole	272	0.346503	1.48641	0.00019998	0.00389433	0.00300295	3423	tags=55%, list=40%, signal=34%	151636/259307/968/1950/10855/284021/23682/27113/1291/1803/3109/3115/3119/3122/3127/375775/54847/1636/100/51816/290/445/10396/23621/718/10203/4680/1393/1519/1522/8448/59345/2822/3108/3117/10410/81618/4035/4036/5551/338382/8635/6383/6441/6448/6556/6272/6948/284417/203068/7436/57406/288/301/8905/408/245973/63827/824/10576/911/972/1203/8895/1512/1513/1520/1521/79901/1601/221955/79980/1917/2171/2331/2…
GO:0002253	BP	GO:0002253	activation of immune response	289	0.343037	1.47354	0.00019998	0.00389433	0.00300295	2414	tags=38%, list=28%, signal=28%	3075/5142/2212/5627/80216/55601/2213/11148/64332/6280/340061/929/2534/3115/3119/3122/3127/3665/4582/5579/91543/6279/7099/2/100/9564/54718/51279/716/717/718/720/721/728/784/919/634/5199/79132/2822/3117/3543/5819/10062/5063/10213/338382/710/6441/9473/7100/28526/11326/7448/409/11119/10384/727/857/30835/10666/952/10462/50856/1380/1513/1520/23191/23586/8891/27086/2357/2358/199920/3113/3120/3123/3146/3…
GO:0002283	BP	GO:0002283	neutrophil activation involved in immune response	224	0.357263	1.52346	0.00019998	0.00389433	0.00300295	2609	tags=43%, list=30%, signal=31%	2212/272/968/10855/6280/340061/929/1116/2934/6279/6402/51816/290/306/10396/718/728/634/4680/5199/23406/1522/10875/9535/3043/25840/4318/4973/5175/10213/25797/8635/27180/6556/6518/6590/374403/203068/221/230/240/64333/10576/57126/960/23601/8895/83716/1512/1520/1536/23191/79930/79980/8288/2171/2204/2357/2358/84443/2717/2896/3146/3240/388697/3310/84329/3683/8514/116844/199675/8972/4311/64386/23114/502…
GO:0005764	CC	GO:0005764	lysosome	272	0.346503	1.48641	0.00019998	0.00389433	0.00300295	3423	tags=55%, list=40%, signal=34%	151636/259307/968/1950/10855/284021/23682/27113/1291/1803/3109/3115/3119/3122/3127/375775/54847/1636/100/51816/290/445/10396/23621/718/10203/4680/1393/1519/1522/8448/59345/2822/3108/3117/10410/81618/4035/4036/5551/338382/8635/6383/6441/6448/6556/6272/6948/284417/203068/7436/57406/288/301/8905/408/245973/63827/824/10576/911/972/1203/8895/1512/1513/1520/1521/79901/1601/221955/79980/1917/2171/2331/2…
GO:0007059	BP	GO:0007059	chromosome segregation	144	0.379299	1.58823	0.00019998	0.00389433	0.00300295	2874	tags=49%, list=33%, signal=33%	157570/56271/672/83990/9134/990/2177/2669/23397/699/113130/81620/55839/55166/387103/1894/146956/2237/4085/54069/55706/79023/56852/5889/116028/220134/10592/54908/7153/7273/11130/332/9184/55143/64105/201254/11144/79075/79980/1843/9700/57697/26271/83903/3835/11004/24137/3833/90417/23310/64151/4751/83540/11339/5901/1104/9985/151246/348235/221150/292/9126/10615/57405/10734/10460/56155/9319/7283/8239
GO:0007162	BP	GO:0007162	negative regulation of cell adhesion	146	0.374773	1.57016	0.00019998	0.00389433	0.00300295	2785	tags=47%, list=32%, signal=33%	1545/604/2213/650/29126/3559/4582/5270/94/445/999/634/1051/1277/10391/6387/2065/10875/10457/3566/3902/3956/4035/8654/90102/6441/7045/7057/7422/11326/27299/301/384/395/114897/972/942/928/1041/23603/1843/2192/2737/3077/3142/3146/182/3718/58494/9314/3965/4241/4323/4763/5074/91584/5364/5621/5788/5921/28984/27289/6385/9037/6591/8651/201633/79626/27242
GO:0007169	BP	GO:0007169	transmembrane receptor protein tyrosine kinase signaling pathway	318	0.333845	1.43756	0.00019998	0.00389433	0.00300295	2701	tags=42%, list=31%, signal=30%	26509/5157/29760/1950/3690/4914/650/1490/54541/2534/2537/3678/8829/5579/11156/84632/558/9564/1019/8851/634/1277/1436/4921/1942/1978/2043/2065/79633/2261/100132074/2822/1839/3082/3486/3487/3488/6453/8997/4035/5600/4233/4318/5063/5154/5155/5166/6383/143686/9021/6653/6272/10253/7057/7422/7448/8936/9068/3730/8862/367/245973/534/627/685/868/10849/924/925/8895/1435/64651/1536/23191/780/2202/1949/1969/8…
GO:0010975	BP	GO:0010975	regulation of neuron projection development	234	0.351846	1.5022	0.00019998	0.00389433	0.00300295	2789	tags=44%, list=32%, signal=31%	4914/6280/2534/3655/8829/57580/349667/57698/347733/10090/8851/1496/1522/6387/1742/26052/1942/2043/2258/2335/100132074/3082/81618/6453/8997/3956/4035/11178/4133/4830/4897/4974/5063/10769/5792/5649/6383/10500/8482/6474/6696/80725/55714/7422/7436/7533/577/389658/10677/53335/627/80823/655/659/84446/8536/55704/952/8837/1141/1268/1272/2017/23191/23258/27185/22943/1809/80258/1949/2146/2288/2896/9314/839…
GO:0022008	BP	GO:0022008	neurogenesis	709	0.302729	1.32406	0.00019998	0.00389433	0.00300295	2916	tags=40%, list=34%, signal=29%	6347/55715/6348/604/8553/1952/1524/79659/4914/4983/26227/6280/133/650/79094/54541/1719/2534/2934/3655/89797/8829/639/57580/349667/6279/5270/57698/7015/7099/10100/347733/10090/558/25825/718/728/999/8851/1051/1436/1496/1522/6387/1742/54567/26052/1869/1894/1942/1959/2043/2065/2119/79633/2258/2335/2348/100132074/2621/3280/55502/3082/28996/3398/285313/3624/81618/6453/8997/84623/3956/59352/3976/4035/40…
GO:0022409	BP	GO:0022409	positive regulation of cell-cell adhesion	150	0.375896	1.57742	0.00019998	0.00389433	0.00300295	2910	tags=49%, list=34%, signal=33%	6347/604/11148/64332/29126/1803/2113/2534/3109/3115/3559/3655/100/199/246/923/4680/10370/1960/3280/3566/3956/4602/5063/5896/288/301/655/857/6352/729230/30835/960/970/972/942/11221/1949/10272/2737/3113/3142/3146/3329/3383/3485/3592/3593/3553/51561/3565/3574/3575/3718/3965/10725/114548/8013/5058/8613/5724/5788/140885/10326/8651/9840/7037/7070/7124/8744/7412/64115/7535
GO:0023057	BP	GO:0023057	negative regulation of signaling	582	0.309661	1.34995	0.00019998	0.00389433	0.00300295	2905	tags=42%, list=34%, signal=30%	604/1524/1950/2213/133/493/650/672/929/79094/1649/54541/115265/9249/2534/2537/3655/4582/8829/54625/7703/5579/5270/7015/7099/100/84962/597/634/153222/1393/1491/1500/6387/3576/220042/79132/54567/1844/1848/1942/51162/2065/2203/10468/2621/64388/1839/57493/3082/28996/3162/3486/3487/3488/3624/3638/8997/3976/4035/4036/4233/407975/4318/58529/10062/113791/10769/23645/10213/338382/27303/9628/54894/143686/1…
GO:0042063	BP	GO:0042063	gliogenesis	138	0.383152	1.60129	0.00019998	0.00389433	0.00300295	2813	tags=47%, list=33%, signal=32%	6347/6348/1524/26227/650/2934/6279/5270/7015/7099/10100/25825/728/8851/1436/1869/1959/2043/2065/2119/3280/3398/3976/4035/4036/4602/5649/7448/301/274/729230/928/983/1021/1435/27185/11221/8891/2146/2358/2737/2896/79885/3459/3553/3913/3949/4323/54587/4664/4665/400746/10397/4763/54413/3084/56978/5764/4919/4920/85414/7124/27242/7161/54209
GO:0042110	BP	GO:0042110	T cell activation	250	0.353774	1.51374	0.00019998	0.00389433	0.00300295	2917	tags=46%, list=34%, signal=31%	6347/604/2213/11148/64332/29126/1803/2177/2534/2841/2934/3109/3115/3559/639/57580/91543/79865/677/100/199/923/634/1051/1503/54567/1960/10875/10457/3280/3566/3902/3956/4602/5063/8654/5896/6097/6441/6556/11326/6935/301/384/602/11119/857/6352/729230/911/30835/960/924/970/972/942/925/1021/50856/11221/1949/2175/27086/2737/3077/3113/3142/3146/3329/3383/3485/3592/3593/8809/3553/51561/3565/3574/3575/3662…
GO:0043312	BP	GO:0043312	neutrophil degranulation	224	0.357263	1.52346	0.00019998	0.00389433	0.00300295	2609	tags=43%, list=30%, signal=31%	2212/272/968/10855/6280/340061/929/1116/2934/6279/6402/51816/290/306/10396/718/728/634/4680/5199/23406/1522/10875/9535/3043/25840/4318/4973/5175/10213/25797/8635/27180/6556/6518/6590/374403/203068/221/230/240/64333/10576/57126/960/23601/8895/83716/1512/1520/1536/23191/79930/79980/8288/2171/2204/2357/2358/84443/2717/2896/3146/3240/388697/3310/84329/3683/8514/116844/199675/8972/4311/64386/23114/502…
GO:0044255	BP	GO:0044255	cellular lipid metabolic process	390	0.325164	1.40675	0.00019998	0.00389433	0.00300295	3144	tags=49%, list=36%, signal=33%	9619/1545/1645/1646/8605/23682/144110/8644/672/9249/5168/11343/114884/5742/55304/39/11332/6296/84962/1109/246/718/634/1071/1436/4051/2261/2528/2678/2822/401494/3613/3638/3696/4035/4036/84879/166785/10062/5106/5154/5155/5166/23590/113791/51365/6319/6383/81537/9021/6653/55151/225/84696/57406/10449/31/55289/23305/84532/55902/56895/221/7915/240/241/301/313/377/8706/8705/56898/824/857/3491/972/54982/1…
GO:0045597	BP	GO:0045597	positive regulation of cell differentiation	459	0.318311	1.38148	0.00019998	0.00389433	0.00300295	2828	tags=41%, list=33%, signal=29%	6348/8519/604/1524/64332/4914/6280/133/650/1490/1052/2113/2534/3559/3655/4254/8829/57580/5270/285590/57698/7015/347733/677/94/100/558/760/634/1051/1277/1491/1496/6387/4921/1742/1869/1894/1960/2043/2119/2335/2353/100132074/2621/3280/3082/3398/3486/3566/3624/6453/8997/3976/4035/4036/5600/4602/4830/4897/128506/5063/8654/91461/10848/338382/5896/5649/8482/6474/9021/55714/7041/7422/7436/7480/81029/7516…
GO:0050808	BP	GO:0050808	synapse organization	208	0.359983	1.53111	0.00019998	0.00389433	0.00300295	2578	tags=42%, list=30%, signal=30%	7162/6678/347902/1524/2213/4914/4983/9806/440279/2534/8829/11346/85461/58504/8927/718/728/784/785/999/8851/1496/1742/58512/26052/1942/2043/2119/2149/6453/8997/84623/266727/4897/5063/56123/56097/5792/5649/23657/80725/203068/8936/87/577/288/63827/627/80823/8536/1141/9746/2017/23191/27185/22943/10160/23769/3587/3913/79414/78999/94030/10397/9148/23114/54413/3084/8828/5021/27253/56126/56125/56122/5613…
GO:0050839	MF	GO:0050839	cell adhesion molecule binding	233	0.355327	1.51685	0.00019998	0.00389433	0.00300295	2431	tags=41%, list=28%, signal=30%	57175/2013/8496/3690/1490/23670/57530/6624/3678/3655/57698/999/8851/1307/1496/1500/6387/23348/2335/54874/10755/10457/7087/3696/143098/5819/90102/10848/5792/8482/6520/6696/8407/55714/7045/7057/9414/7112/7448/87/90/8745/11093/10598/288/301/659/800/822/3491/57126/10666/928/11135/1013/54825/10518/57650/9793/1289/8727/2017/81624/1969/10516/2200/2246/8357/8353/3146/3383/3384/3553/3683/26548/3691/3693/3…
GO:0050867	BP	GO:0050867	positive regulation of cell activation	186	0.37993	1.60836	0.00019998	0.00389433	0.00300295	2910	tags=49%, list=34%, signal=33%	6347/6348/604/11148/64332/1490/29126/958/1803/2534/3109/3115/3559/4436/7099/100/199/558/825/923/1960/2621/3280/3543/3566/3956/4602/5819/5063/5896/7057/28526/301/79915/857/6352/729230/57126/30835/10666/952/970/972/942/1026/1050/1141/11221/1949/2737/3113/3134/3142/3146/3329/3485/3493/3494/3514/3592/3593/3553/9173/51561/3565/3567/3574/3575/3718/3965/4323/114548/8013/7468/5058/5159/5724/5788/140885/1…
GO:0051098	BP	GO:0051098	regulation of binding	172	0.369026	1.55764	0.00019998	0.00389433	0.00300295	1845	tags=35%, list=21%, signal=28%	151636/83666/1950/340061/650/1649/3434/8829/7015/165904/1636/113130/81620/1522/1869/2043/64388/3280/28996/3162/3398/3433/3976/4035/4133/22924/4233/4318/4830/5155/10769/5792/6590/6653/7049/7448/408/409/9532/25805/602/627/8536/857/1054/1193/1203/1565/1601/27185/22943/151651/51053/3001/3005/10014/3077/8091/3146/3399/3662
GO:0051301	BP	GO:0051301	cell division	288	0.336115	1.44374	0.00019998	0.00389433	0.00300295	2917	tags=45%, list=34%, signal=31%	388/83990/9134/993/990/23397/23594/5933/9564/641/675/699/168448/113130/1017/1019/81620/387103/1163/1894/2037/2119/2258/10755/3070/3978/4085/22924/84930/54069/54892/79023/5154/5155/10769/84440/389/5414/220134/10592/54908/54962/7153/203068/7422/7443/55055/11130/288/332/79866/685/9184/387695/91768/901/8555/995/55143/983/1021/1058/55835/201254/9793/1164/23332/11064/1638/79980/6990/79733/54821/9700/21…
GO:0070997	BP	GO:0070997	neuron death	160	0.374728	1.57747	0.00019998	0.00389433	0.00300295	1282	tags=29%, list=15%, signal=25%	6347/6348/1524/2213/4914/26471/1649/54541/2534/4436/8829/7015/7099/558/23621/728/8851/1051/1522/2065/2149/2353/10457/28996/3162/6453/4035/4602/4605/22861/1728/5063/22800/10280/23657/6653/7516/408/409/468/10018/627/80823/7832/824/6352
GO:0071396	BP	GO:0071396	cellular response to lipid	261	0.347861	1.49022	0.00019998	0.00389433	0.00300295	2447	tags=39%, list=28%, signal=29%	6347/5142/6348/19/1646/968/1524/5244/8644/358/672/929/29126/3627/2920/54541/114907/4360/7099/677/445/478/558/923/1019/1051/1277/153222/1393/3576/1869/1978/2822/3015/3624/3638/4602/4830/10062/2494/5031/5106/5166/6097/6696/7041/7480/81029/7533/31/11093/301/367/409/10018/632/655/57658/824/6352/4064/942/1053/8837/129607/1437/6373/1601/84649/2274/2288/2322/27086/2707/54331/2852/10014/3146/3157/3383/33…
GO:0071417	BP	GO:0071417	cellular response to organonitrogen compound	248	0.351909	1.5052	0.00019998	0.00389433	0.00300295	3036	tags=48%, list=35%, signal=32%	5142/2213/358/493/672/83990/837/990/1291/2534/5579/5888/6472/7099/677/199/445/478/23621/9564/641/760/773/999/1019/634/1051/1307/1277/64506/1393/1583/1978/2043/2348/100132074/2822/3488/3843/4035/5031/5106/5166/5872/143686/6546/9021/6653/9882/55151/7480/6935/9472/468/245973/534/53335/10018/632/824/652968/857/8837/10518/1395/1536/23191/2146/2200/2358/2549/2690/54331/2819/2852/2887/10014/3383/3553/36…
GO:0098590	CC	GO:0098590	plasma membrane region	597	0.309343	1.34923	0.00019998	0.00389433	0.00300295	2742	tags=40%, list=32%, signal=29%	2013/84168/770/26509/3690/388/8140/23428/440279/5244/358/493/284119/9249/1803/6624/2564/3678/3655/8516/4582/8829/23362/8470/11346/85461/30817/199/154810/360/728/760/768/784/8436/999/634/4680/64506/1496/23109/4921/1742/58512/26052/1894/5169/2043/2065/2149/221472/2335/2348/2565/2570/2894/9843/3162/24138/9132/4035/4036/11178/9053/84930/4233/4830/4897/5031/56123/5155/10733/112476/84440/10235/389/1028…
GO:0098657	BP	GO:0098657	import into cell	417	0.325871	1.4121	0.00019998	0.00389433	0.00300295	3332	tags=50%, list=39%, signal=32%	3959/6347/2212/54453/6678/19/1950/2213/3690/4983/58480/133/493/929/5168/2534/2934/4360/7099/199/246/306/478/558/717/718/720/721/10203/919/923/634/3576/1742/26052/5169/54874/2348/2621/3043/7087/3543/3601/3560/6453/3757/4035/4036/4233/4830/10062/5031/29763/5175/338382/6441/6614/6556/6510/6518/6520/113235/6541/23657/6546/285195/29887/6653/6272/8406/85439/55333/7052/7057/28526/7422/7436/7448/8936/301…
GO:0098771	BP	GO:0098771	inorganic ion homeostasis	312	0.328985	1.41558	0.00019998	0.00389433	0.00300295	2828	tags=42%, list=33%, signal=30%	6348/793/1524/2034/23682/6280/23428/133/84239/493/958/3627/1649/2534/2841/9290/5579/6279/11346/9429/478/728/760/773/784/825/6387/10800/1742/2149/9843/3162/3757/4035/4502/5026/5031/5166/6556/1318/113235/83697/6546/285195/29887/8614/7052/55151/148/9472/288/187/468/491/245973/534/554/56898/114897/794/857/6352/729230/952/10518/1193/1203/54982/1268/6373/79901/27185/23312/1815/1907/151176/30001/2151/90…
GO:1901699	BP	GO:1901699	cellular response to nitrogen compound	272	0.346653	1.48706	0.00019998	0.00389433	0.00300295	2877	tags=44%, list=33%, signal=30%	5142/2213/340061/358/493/672/83990/837/990/1291/2534/3434/5579/5888/6472/7099/677/199/445/478/23621/9564/641/760/773/999/1017/1019/8851/634/1051/1307/1277/64506/1393/1583/1978/2043/2348/100132074/2822/3488/3843/4035/5031/5106/5166/5872/143686/6546/9021/6653/9882/55151/7480/6935/9472/468/245973/534/53335/10018/632/824/652968/857/8837/1141/10518/1395/1536/23191/23586/2146/2200/2358/2549/2690/2769/5…
GO:0001558	BP	GO:0001558	regulation of cell growth	163	0.378639	1.595	0.0002	0.00389433	0.00300295	2823	tags=48%, list=33%, signal=33%	604/6280/55840/3872/8829/6279/5270/57698/94/9564/8851/634/6387/2203/2258/2335/1839/3486/3487/3488/3490/3624/4035/4133/4897/10235/10500/8482/6446/10110/6696/54879/7422/91/9472/53335/627/659/694/952/54825/1026/1032/9746/2017/23191/780/27185/23136/23404/10516/26153/4323/10276/5058/10038/5245/91584/8643/5795/5999/8153/65078/7869/10512/223117/6405/56920/64218/57715/9037/10501/83667/8877/51760/127833/2…
GO:0090287	BP	GO:0090287	regulation of cellular response to growth factor stimulus	132	0.388167	1.61807	0.0002	0.00389433	0.00300295	1941	tags=40%, list=22%, signal=32%	26509/3690/3678/8516/5579/11156/94/10370/2348/10468/10755/64388/3280/28996/4036/407975/5046/6653/10253/7041/7049/7057/7422/7448/8936/6935/9719/8862/25805/283149/659/857/3491/135228/1028/8837/286204/23191/1601/199699/22943/2022/2200/2201/2246/8817/2297/10272/2887/5654/3553/57608/753
GO:0005125	MF	GO:0005125	cytokine activity	110	0.39577	1.63416	0.00020002	0.00389433	0.00300295	1835	tags=37%, list=21%, signal=30%	6347/6348/414062/650/3627/2920/83729/4254/6387/3576/64388/3624/3976/6398/6696/8743/9966/7422/655/387695/727/6367/6352/970/112616/1435/1437/6373/2896/3146/3589/3592/3593/3553/51561/9235/3565/3567/3574/3623/3626
GO:0007187	BP	GO:0007187	G protein-coupled receptor signaling pathway, coupled to cyclic nucleotide second messenger	109	0.396846	1.63766	0.00020002	0.00389433	0.00300295	3099	tags=61%, list=36%, signal=39%	6347/19/9590/133/493/3627/4886/30817/10203/4883/11251/577/79924/148/301/554/1268/1395/6373/1815/2357/2358/8811/2769/2774/54331/2852/2827/8477/2899/2912/2918/8685/5144/5732/5734/5739/5996/6753/6915/7253/7433/196883/112/113/115/575/576/283383/2015/976/10149/221188/84873/22859/23266/64123/134/147/146/150/151/152/154/11214/9495
GO:0097191	BP	GO:0097191	extrinsic apoptotic signaling pathway	110	0.396286	1.63629	0.00020002	0.00389433	0.00300295	1927	tags=40%, list=22%, signal=31%	672/2534/2537/3655/4254/8829/7015/597/27018/2065/2261/50486/3082/3162/3429/3624/81618/4055/81537/10572/6272/8406/7057/7078/8743/7185/90/91/367/10018/857/970/8837/1437/2017/64798/55179/2852/3383/3592/3553/3574/3875/3856
GO:0071229	BP	GO:0071229	cellular response to acid chemical	107	0.398741	1.64341	0.00020004	0.00389433	0.00300295	2401	tags=44%, list=28%, signal=32%	19/1645/1646/5244/8644/358/1291/2534/6472/1109/445/1019/1051/1307/1277/64506/1869/2348/3843/4602/4830/5031/5155/5166/143686/7422/7480/81029/6935/31/53335/824/652968/1536/84649/2707/54331/3399/9314/3949/9148/56034/80310/65018/5724/5732/5734
GO:0000302	BP	GO:0000302	response to reactive oxygen species	105	0.408244	1.68022	0.00020008	0.00389433	0.00300295	2352	tags=46%, list=27%, signal=34%	1545/388/8644/358/1719/2113/2534/7703/100/558/1017/1277/1894/2353/3043/3082/3162/4151/4233/4318/4602/1728/5111/143686/10280/6546/301/655/824/983/8837/1843/2146/10516/51022/3240/8807/3741/23135/9314/10276/51314/8013/5074/80310/5159/65018/59338
GO:0043281	BP	GO:0043281	regulation of cysteine-type endopeptidase activity involved in apoptotic process	102	0.406255	1.66823	0.00020008	0.00389433	0.00300295	2361	tags=45%, list=27%, signal=33%	6280/358/27113/837/1490/2934/2537/6279/5272/27018/2149/2621/3082/4318/22861/5896/7057/8743/9966/7422/408/409/10018/332/838/3491/960/1032/8837/1512/54205/112399/2152/2852/3092/3146/3329/3336/9314/27074/3965/114548/5023/9141/5329/5366
GO:0044706	BP	GO:0044706	multi-multicellular organism process	104	0.416256	1.71214	0.00020008	0.00389433	0.00300295	2408	tags=46%, list=28%, signal=34%	2013/8605/133/8528/2113/3678/23764/639/5270/285590/1307/1393/2057/2353/3488/3490/8997/3976/4318/6696/8614/91/92/367/659/824/952/1268/1543/780/8909/2192/2288/3077/3248/3291/3485/3553/3726/3965/7026/5021/5023/5125/8398/5724/5740/5764
GO:0050866	BP	GO:0050866	negative regulation of cell activation	104	0.411452	1.69238	0.00020008	0.00389433	0.00300295	2885	tags=53%, list=33%, signal=36%	604/2213/284021/29126/3559/5270/558/634/1051/5169/10875/10457/3162/3398/3566/3624/3902/10062/8654/5154/5155/6441/11326/301/384/114897/729230/972/942/928/1268/2737/2852/2896/3077/3134/3142/3146/133396/3623/3718/3949/3965/100507436/5074/5621/5788/6385/8651/7056/201633/79626/27242/7301/64115
GO:0060541	BP	GO:0060541	respiratory system development	102	0.405728	1.66606	0.00020008	0.00389433	0.00300295	1648	tags=38%, list=19%, signal=31%	6678/2034/1490/1116/100/445/1522/1978/57493/3280/8820/3488/3976/407975/5154/91461/6441/23657/10253/55151/64759/7422/26154/93/9719/659/1050/83716/1512/1717/123872/1896/1907/80004/2246/8817/10272/2735/2737
GO:0071222	BP	GO:0071222	cellular response to lipopolysaccharide	95	0.413346	1.69042	0.00020014	0.00389433	0.00300295	1847	tags=37%, list=21%, signal=29%	6347/5142/6348/19/968/1524/929/29126/3627/2920/4360/7099/445/558/923/1019/1051/3576/10062/11093/824/6352/4064/942/1053/129607/1437/6373/10014/3146/3383/3592/3593/3553/345611
GO:0007584	BP	GO:0007584	response to nutrient	94	0.414337	1.69351	0.00020016	0.00389433	0.00300295	1430	tags=35%, list=17%, signal=30%	6678/19/8644/83990/3627/2534/2934/7298/100/360/445/717/1277/2348/2621/8520/3162/1728/5026/5111/6546/6696/8614/191/53335/632/655/652968/1032/10518/1268/1536/1543
GO:0030324	BP	GO:0030324	lung development	94	0.407494	1.66554	0.00020016	0.00389433	0.00300295	1648	tags=38%, list=19%, signal=31%	6678/2034/1490/1116/100/1522/1978/57493/3280/3488/3976/407975/5154/91461/6441/23657/10253/55151/64759/7422/26154/93/9719/659/1050/83716/1512/1717/123872/1907/80004/2246/8817/10272/2735/2737
GO:0002526	BP	GO:0002526	acute inflammatory response	91	0.419106	1.70913	0.00020018	0.00389433	0.00300295	1857	tags=38%, list=22%, signal=31%	3075/5627/2213/26471/6279/54210/2/445/716/717/718/720/721/728/923/1051/5199/2161/2335/710/11326/7448/90/727/9332/1268/1380/2152/3077/3240/3250/3383/3514/3553/3700
GO:0002695	BP	GO:0002695	negative regulation of leukocyte activation	91	0.417799	1.7038	0.00020018	0.00389433	0.00300295	2885	tags=54%, list=33%, signal=36%	604/2213/284021/29126/3559/558/634/1051/5169/10875/10457/3162/3398/3566/3624/3902/10062/8654/6441/11326/301/384/729230/972/942/1268/2737/2852/2896/3077/3134/3142/3146/133396/3623/3718/3949/3965/100507436/5074/5621/5788/6385/8651/201633/79626/27242/7301/64115
GO:0006575	BP	GO:0006575	cellular modified amino acid metabolic process	89	0.431531	1.75677	0.0002002	0.00389433	0.00300295	1661	tags=39%, list=19%, signal=32%	501/51268/79094/1719/2941/114884/8974/6472/7298/445/494143/548596/1159/2348/79017/2678/10797/51365/5625/113235/23657/191/160428/7915/51074/57571/50506/112399/30001/56605/10841/2679/2686/51022/27232
GO:1903707	BP	GO:1903707	negative regulation of hemopoiesis	79	0.424823	1.7179	0.0002002	0.00389433	0.00300295	2083	tags=44%, list=24%, signal=34%	6348/604/2213/9290/8365/7099/677/634/10875/3280/3398/3566/3624/3902/54892/4830/301/972/1021/51208/2200/10272/2737/29909/121504/8370/8366/3142/3146/3205/3565/3623/3718/10234/9935
GO:0002819	BP	GO:0002819	regulation of adaptive immune response	88	0.414388	1.68481	0.00020022	0.00389433	0.00300295	1862	tags=41%, list=22%, signal=32%	604/2213/64332/29126/958/3665/4436/91543/100/246/718/634/3566/5819/6556/301/79915/729230/911/10666/962/11221/3077/3134/3142/3146/3329/3592/3593/8809/3553/9173/51561/3565/3575/3718
GO:0010952	BP	GO:0010952	positive regulation of peptidase activity	88	0.423989	1.72385	0.00020022	0.00389433	0.00300295	2361	tags=47%, list=27%, signal=34%	84168/6280/27113/837/1490/2534/2934/4210/6279/27018/1942/2043/2149/2335/22861/10213/8743/9966/408/10018/838/857/3491/8837/1512/54205/112399/2152/2192/2852/2896/3092/3146/3329/3336/3965/114548/5023/9141/65018/5366
GO:0043903	BP	GO:0043903	regulation of symbiosis, encompassing mutualism through parasitism	80	0.433825	1.75554	0.00020024	0.00389433	0.00300295	1306	tags=35%, list=15%, signal=30%	6348/8519/4940/2934/3434/5091/91543/164668/1436/3576/3429/24138/10410/3669/3956/4599/5819/2494/4938/6441/6590/7153/140564/60489/10018/857/6352/972
GO:0048771	BP	GO:0048771	tissue remodeling	81	0.425814	1.72424	0.00020026	0.00389433	0.00300295	1861	tags=43%, list=22%, signal=34%	2034/3690/9290/1636/94/558/760/634/1436/54567/2149/10457/3488/3976/4853/5166/29887/6696/7052/93/301/632/659/857/729230/952/51208/1513/1969/2702/3146/3593/51561/3574/182
GO:0005770	CC	GO:0005770	late endosome	87	0.420708	1.70882	0.00020028	0.00389433	0.00300295	1940	tags=40%, list=22%, signal=32%	968/4914/388/1649/3109/3122/3127/23621/8938/1393/2149/3108/10410/6490/338382/153020/6441/6556/1318/285195/6653/23555/10791/57406/972/8218/1512/1520/2896/3123/3592/3593/57535/27074/3949
GO:0034614	BP	GO:0034614	cellular response to reactive oxygen species	71	0.439372	1.75873	0.000200441	0.00389433	0.00300295	2352	tags=49%, list=27%, signal=36%	1545/388/8644/358/1719/2113/7703/558/1017/1894/2353/3082/4233/4318/4602/1728/5111/10280/301/655/983/8837/2146/10516/51022/8807/23135/9314/10276/51314/8013/5074/80310/65018/59338
GO:1901216	BP	GO:1901216	positive regulation of neuron death	52	0.466459	1.80951	0.000201613	0.00390505	0.00301121	1850	tags=42%, list=21%, signal=33%	6348/2213/26471/1649/54541/2534/7099/23621/8851/1522/2353/4602/4605/1728/5063/468/10018/824/22943/2901/2896/3672
GO:0019199	MF	GO:0019199	transmembrane receptor protein kinase activity	49	0.483853	1.86393	0.000202081	0.00390505	0.00301121	2490	tags=57%, list=29%, signal=41%	5157/4914/8829/94/558/1436/4921/2043/2065/2261/4233/7049/90/91/92/93/659/780/2202/1949/1969/2264/2322/3645/4486/8828/5159/4920
GO:0071887	BP	GO:0071887	leukocyte apoptotic process	49	0.486081	1.87251	0.000202081	0.00390505	0.00301121	1945	tags=49%, list=23%, signal=38%	1831/604/29126/3559/3665/4254/100/558/6387/1942/2621/407975/5896/23657/301/384/10018/6352/972/27086/2737/3575/3718/3965
GO:1901989	BP	GO:1901989	positive regulation of cell cycle phase transition	47	0.495519	1.89791	0.000202388	0.00390505	0.00301121	1874	tags=51%, list=22%, signal=40%	993/8318/990/7015/199/113130/1019/81620/51514/27085/5889/7480/9510/301/79915/995/983/1543/9700/2146/26271/2735/3306/3741
GO:0070301	BP	GO:0070301	cellular response to hydrogen peroxide	44	0.497971	1.88784	0.000202881	0.00390781	0.00301335	2675	tags=61%, list=31%, signal=43%	1545/388/358/2113/7703/558/1894/3082/4233/4602/1728/5111/10280/301/983/2146/8807/23135/9314/10276/8013/5074/80310/65018/59338/140885/8877
GO:1901992	BP	GO:1901992	positive regulation of mitotic cell cycle phase transition	40	0.515999	1.93065	0.000203583	0.0039146	0.00301858	2463	tags=60%, list=29%, signal=43%	993/8318/990/7015/199/113130/1019/81620/51514/27085/5889/7480/9510/301/995/983/1543/9700/26271/3306/3741/134353/5890/28984
GO:0015918	BP	GO:0015918	sterol transport	33	0.530856	1.93552	0.000205381	0.0039424	0.00304002	1261	tags=39%, list=15%, signal=34%	9619/19/1645/1950/5244/114884/1071/4035/10062/114880/158219/26154/857
GO:0050688	BP	GO:0050688	regulation of defense response to virus	32	0.561447	2.03852	0.000205931	0.00394618	0.00304294	1821	tags=50%, list=21%, signal=40%	151636/83666/55601/340061/3434/3559/79132/10875/51191/54765/60489/23586/5654/3593/3553/51561
GO:0042379	MF	GO:0042379	chemokine receptor binding	30	0.574687	2.06221	0.000207211	0.00395716	0.0030514	1452	tags=47%, list=17%, signal=39%	6347/6348/414062/3627/2920/6387/3576/387695/727/6367/6352/729230/6373/1672
GO:0090329	BP	GO:0090329	regulation of DNA-dependent DNA replication	30	0.559607	2.0081	0.000207211	0.00395716	0.0030514	1654	tags=57%, list=19%, signal=46%	604/5983/641/675/1017/81620/5982/5984/5985/90381/54962/10926/29980/79075/79733/26271/51053
GO:0043277	BP	GO:0043277	apoptotic cell clearance	28	0.570888	2.0219	0.000208138	0.00396135	0.00305463	967	tags=46%, list=11%, signal=41%	6347/3690/246/558/717/718/720/721/2621/4035/10062/7052/7057
GO:2000107	BP	GO:2000107	negative regulation of leukocyte apoptotic process	28	0.585465	2.07353	0.000208138	0.00396135	0.00305463	1862	tags=61%, list=22%, signal=48%	1831/604/3665/4254/100/558/6387/1942/2621/407975/5896/384/6352/972/27086/3575/3718
GO:0006301	BP	GO:0006301	postreplication repair	23	0.60597	2.05561	0.000212834	0.00403699	0.00311296	852	tags=48%, list=10%, signal=43%	9768/672/4436/5983/51514/5111/10714/56852/5982/5984/5985
GO:0043596	CC	GO:0043596	nuclear replication fork	23	0.611324	2.07377	0.000212834	0.00403699	0.00311296	1024	tags=57%, list=12%, signal=50%	8318/51659/55388/23649/84296/4172/5111/5422/10714/5557/5558/54962/11169
GO:0000307	CC	GO:0000307	cyclin-dependent protein kinase holoenzyme complex	21	0.61273	2.0355	0.000215448	0.00407965	0.00314585	1359	tags=57%, list=16%, signal=48%	9134/1017/1019/1163/5111/901/79616/983/1021/1026/1032/1164
GO:0042611	CC	GO:0042611	MHC protein complex	17	0.675866	2.1328	0.000221484	0.00418687	0.00322853	1753	tags=71%, list=20%, signal=56%	3109/3115/3119/3122/3127/3108/3117/972/3113/3120/3123/3134
GO:0033344	BP	GO:0033344	cholesterol efflux	16	0.669176	2.08316	0.000222941	0.0042073	0.00324428	1044	tags=50%, list=12%, signal=44%	9619/19/1950/1071/4035/10062/158219/26154
GO:0006284	BP	GO:0006284	base-excision repair	15	0.684401	2.09521	0.000224896	0.00423706	0.00326723	2493	tags=93%, list=29%, signal=66%	1763/2237/3978/55247/5111/10721/7374/3159/8091/4913/10038/5424/6118/6119
GO:0034204	BP	GO:0034204	lipid translocation	14	0.680952	2.04941	0.000227713	0.00427572	0.00329705	378	tags=43%, list=4%, signal=41%	19/5244/23120/57205/10396/57198
GO:0045332	BP	GO:0045332	phospholipid translocation	14	0.680952	2.04941	0.000227713	0.00427572	0.00329705	378	tags=43%, list=4%, signal=41%	19/5244/23120/57205/10396/57198
GO:0000076	BP	GO:0000076	DNA replication checkpoint	11	0.736497	2.08271	0.000235018	0.00439813	0.00339144	973	tags=73%, list=11%, signal=65%	8318/990/63967/4998/81620/1763/90381/54962
GO:0048185	MF	GO:0048185	activin binding	11	0.727596	2.05754	0.000235018	0.00439813	0.00339144	1607	tags=82%, list=19%, signal=67%	94/10468/7049/90/91/92/93/2022/10272
GO:0009147	BP	GO:0009147	pyrimidine nucleoside triphosphate metabolic process	10	0.763643	2.10273	0.000239206	0.00446904	0.00344611	1382	tags=80%, list=16%, signal=67%	7298/1503/79077/1841/1854/4830/4833/129607
GO:0035313	BP	GO:0035313	wound healing, spreading of epidermal cells	9	0.747819	2.00113	0.000244439	0.00455919	0.00351563	1397	tags=78%, list=16%, signal=65%	3678/94/84962/1839/90102/23332/1289
GO:0010745	BP	GO:0010745	negative regulation of macrophage derived foam cell differentiation	8	0.792761	2.04515	0.000251004	0.00467385	0.00360405	757	tags=62%, list=9%, signal=57%	9619/19/3690/1071/10062
GO:0038171	BP	GO:0038171	cannabinoid signaling pathway	6	0.833913	1.96329	0.000267058	0.00496453	0.00382819	1438	tags=100%, list=17%, signal=83%	9290/11343/57406/1268/747/221955
GO:0004622	MF	GO:0004622	lysophospholipase activity	5	0.864701	1.9231	0.000276817	0.0051289	0.00395494	263	tags=80%, list=3%, signal=78%	8605/5168/11343/375775
GO:0031261	CC	GO:0031261	DNA replication preinitiation complex	5	0.871166	1.93748	0.000276817	0.0051289	0.00395494	576	tags=80%, list=7%, signal=75%	8318/9837/51659/84296
GO:0004791	MF	GO:0004791	thioredoxin-disulfide reductase activity	3	-0.958725	-2.02065	0.000286779	0.00529596	0.00408376	360	tags=100%, list=4%, signal=96%	10587/114112
GO:0061303	BP	GO:0061303	cornea development in camera-type eye	3	-0.974377	-2.05364	0.000286779	0.00529596	0.00408376	225	tags=100%, list=3%, signal=97%	7475/7483
GO:0005663	CC	GO:0005663	DNA replication factor C complex	4	0.90167	1.86147	0.000293513	0.00534451	0.0041212	852	tags=100%, list=10%, signal=90%	5983/5982/5984/5985
GO:0033567	BP	GO:0033567	DNA replication, Okazaki fragment processing	4	0.900974	1.86004	0.000293513	0.00534451	0.0041212	858	tags=100%, list=10%, signal=90%	1763/2237/3978/10535
GO:0001817	BP	GO:0001817	regulation of cytokine production	345	0.326761	1.40928	0.00029997	0.00534451	0.0041212	2939	tags=43%, list=34%, signal=29%	5142/6348/1545/9590/604/1524/55601/2213/11148/10855/340061/672/929/29126/958/1649/2841/3115/3665/4210/91543/7099/84632/199/558/718/728/923/634/1051/1436/79132/2149/338557/2335/2621/10457/57493/51191/3082/3162/3566/3624/3696/3902/4035/5600/4602/22861/9111/10622/51728/338382/8482/6441/6556/7057/7100/7318/11326/225/301/307/384/408/409/468/602/727/824/729230/10666/972/942/1054/50856/23601/1437/1536/2…
GO:0005774	CC	GO:0005774	vacuolar membrane	149	0.370816	1.55559	0.00029997	0.00534451	0.0041212	3423	tags=58%, list=40%, signal=36%	151636/968/1950/10855/340061/1291/1803/3109/3115/3119/3122/3127/375775/80183/290/10396/4680/59345/2822/3108/3117/10410/81618/4035/4036/338382/6272/284417/7436/8714/57406/8905/408/245973/534/972/1203/8895/79901/1601/221955/1917/2357/2896/3113/3120/3123/3134/345611/57535/11133/27074/3949/4647/326624/220441/51296/26503/284129/7781/7056/7098/51284/157753/53373/154664/20/23461/23457/85320/368/215/5826…
GO:0005924	CC	GO:0005924	cell-substrate adherens junction	195	0.365425	1.54999	0.00029997	0.00534451	0.0041212	2533	tags=42%, list=29%, signal=30%	57175/8496/9590/57514/3690/388/58480/5244/726/1803/2934/3678/3655/8516/8829/8470/165904/84962/58504/83478/9564/10391/4921/2037/2261/3696/4035/5819/90102/10544/22800/171024/7041/7052/64759/8936/87/83543/301/55616/824/857/960/928/11135/10518/23332/23603/8895/1466/2017/23191/1601/2022/1969/54751/10979/2274/23769/2535/3159/3383/3672/3691/3693/3695/4026/4311/4323/10787/4739/23114/4810/5058/55742/5159/…
GO:0008610	BP	GO:0008610	lipid biosynthetic process	271	0.337493	1.44773	0.00029997	0.00534451	0.0041212	3140	tags=51%, list=36%, signal=33%	9619/1588/23682/133/8644/650/672/51171/11343/5742/55304/39/11332/6296/84962/1109/246/718/1019/634/1583/2822/401494/3490/3638/84879/10062/114880/5106/5154/5155/5166/23590/6319/81537/55151/225/84696/57406/10449/31/84532/55902/56895/221/240/241/301/377/8705/824/3491/972/27235/8895/1543/1565/84649/1606/1717/25979/10682/1907/10613/2171/9415/2222/2224/2246/2264/2358/26301/2710/84803/2819/2852/3157/3248…
GO:0009991	BP	GO:0009991	response to extracellular stimulus	201	0.360966	1.5326	0.00029997	0.00534451	0.0041212	2720	tags=44%, list=32%, signal=31%	6678/19/968/4914/133/8644/83990/3627/1649/2534/2934/3655/7298/100/199/360/440/445/558/717/784/1277/79077/1978/2348/2353/2621/8520/3162/1728/4521/115209/5026/5106/5111/5166/6344/143686/6546/6653/6696/8614/7378/191/468/53335/632/655/659/652968/1026/1032/10518/1268/1536/1543/10634/51022/3077/3157/3291/3383/3485/3553/3745/57535/26153/11133/3949/4141/4929/5019/5023/5024/27344/5366/5629/5723/5764/5788/…
GO:0016053	BP	GO:0016053	organic acid biosynthetic process	208	0.3574	1.52012	0.00029997	0.00534451	0.0041212	2405	tags=40%, list=28%, signal=30%	92126/1950/26471/26227/29968/10157/8644/493/672/54541/1719/84706/11343/5742/6472/10090/11332/6296/1109/246/440/445/586/634/1491/2203/2678/2875/401494/3638/55706/10062/79023/114880/5155/5166/6319/225/84696/31/84532/55902/230/240/241/301/51074/63827/57571/102724560/972/1543/1565/1907/387712/10613/2171/9415/2264/2679/2686/2819/3099/80201/3248/7923/3553/344967/51085/4522/25902/162417/339983/122945/52…
GO:0030055	CC	GO:0030055	cell-substrate junction	197	0.365566	1.55106	0.00029997	0.00534451	0.0041212	2533	tags=42%, list=29%, signal=30%	57175/8496/9590/57514/3690/388/58480/5244/726/1803/2934/3678/3655/8516/8829/8470/165904/84962/58504/83478/9564/10391/4921/2037/2261/3696/4035/5819/90102/10544/22800/171024/7041/7052/64759/8936/87/83543/301/55616/824/857/960/928/11135/10518/23332/23603/8895/1466/2017/23191/1601/2022/1969/83481/54751/10979/2274/23769/2535/3159/3383/3672/3691/3693/3695/4026/4311/4323/10787/4739/23114/4810/5058/55742…
GO:0040013	BP	GO:0040013	negative regulation of locomotion	161	0.369382	1.5556	0.00029997	0.00534451	0.0041212	2748	tags=45%, list=32%, signal=31%	6347/57175/1545/8519/1524/1588/388/2841/8829/94/100/199/348110/999/10370/6387/54567/3162/3486/3488/4035/90102/10500/8482/90627/55333/7057/22846/57406/727/29775/972/23332/23603/1809/1843/11221/2022/83481/2192/10014/3146/3565/182/9314/3868/753/11043/65009/4763/7026/3084/11240/138429/5734/5764/5795/28984/6237/7869/10512/223117/6405/56920/64218/57715/9037/10501/56833/57522/6915/7070/7076
GO:0046394	BP	GO:0046394	carboxylic acid biosynthetic process	207	0.359211	1.52724	0.00029997	0.00534451	0.0041212	2405	tags=41%, list=28%, signal=30%	92126/1950/26471/26227/29968/10157/8644/493/672/54541/1719/84706/11343/5742/6472/10090/11332/6296/1109/246/440/445/586/634/1491/2203/2678/2875/401494/3638/55706/10062/79023/114880/5155/5166/6319/225/84696/31/84532/55902/230/240/241/301/51074/63827/57571/102724560/972/1543/1565/1907/387712/10613/2171/9415/2264/2679/2686/2819/3099/80201/3248/7923/3553/344967/51085/4522/25902/162417/339983/122945/52…
GO:0055080	BP	GO:0055080	cation homeostasis	307	0.330057	1.41967	0.00029997	0.00534451	0.0041212	2828	tags=42%, list=33%, signal=30%	6348/793/1524/2034/23682/6280/23428/133/84239/493/958/3627/1649/2534/2841/9290/5579/6279/11346/9429/478/728/760/773/784/825/6387/10800/1742/2149/9843/3162/3757/4035/4502/5026/5031/5166/6556/1318/113235/83697/6546/285195/29887/8614/7052/55151/148/9472/288/187/468/491/245973/534/554/56898/114897/794/857/6352/729230/952/10518/1193/1203/54982/1268/6373/79901/27185/23312/1815/1907/151176/30001/2151/90…
GO:0061458	BP	GO:0061458	reproductive system development	200	0.362779	1.53994	0.00029997	0.00534451	0.0041212	2490	tags=42%, list=29%, signal=31%	1588/2034/4914/26471/133/8644/83990/55840/4254/4436/639/5270/677/100/558/675/1051/10370/1299/2057/3280/3624/3696/3976/4036/4521/51294/5155/10733/5872/6240/9021/6696/8614/400629/8743/22846/7422/92/9510/301/367/408/409/10018/655/659/3491/1028/1050/1437/11144/79733/2175/2189/2288/10272/2707/2735/2737/3157/3205/5654/3383/3623/3726/3856/4188/4311/4323/4327/4678/7026/8204/5159/5333/59338/54477/5740/576…
GO:1901565	BP	GO:1901565	organonitrogen compound catabolic process	450	0.316365	1.37238	0.00029997	0.00534451	0.0041212	2874	tags=41%, list=33%, signal=29%	5142/151636/259307/501/272/1950/10855/26471/4983/51268/10157/493/23670/79094/1649/8528/5168/2534/84706/5270/6472/6999/1636/11332/100/51816/290/164668/554235/23621/25825/586/644/825/999/1017/634/494143/1491/1519/1522/79077/51514/1854/1942/2043/2653/2678/10755/2822/2875/28996/3162/3429/4035/4036/4085/4521/115209/29763/8654/10769/5625/10213/255488/54894/6383/6448/153769/6653/80176/171024/7041/7078/7…
GO:1901652	BP	GO:1901652	response to peptide	216	0.352784	1.50285	0.00029997	0.00534451	0.0041212	3036	tags=48%, list=35%, signal=32%	6678/2213/133/83990/837/1490/990/2534/5579/6775/7099/677/445/478/23621/9564/760/773/27101/1019/634/1277/64506/1393/6387/1583/1959/1978/2043/100132074/2822/3488/4035/4318/22861/5106/5166/5872/143686/9021/6653/6272/6773/8614/9882/7049/8743/301/245973/534/10018/632/655/694/7832/857/8837/1395/1536/23191/8891/2200/2358/2549/2690/2852/2887/10014/3291/3383/3553/3645/182/3718/9314/64900/4141/4322/4929/80…
GO:0045637	BP	GO:0045637	regulation of myeloid cell differentiation	126	0.382328	1.5904	0.0003	0.00534451	0.0041212	1861	tags=39%, list=22%, signal=31%	6348/2113/9290/8365/3665/4254/5579/7099/677/760/634/1051/2353/3398/3624/3976/54892/4830/4853/128506/338382/7057/91/92/632/972/1021/51208/1435/1437/2124/2200/27086/10272/29909/8357/126961/333932/8353/121504/8370/8366/3205/3593/51561/3565/3567/3623/182
GO:0046651	BP	GO:0046651	lymphocyte proliferation	132	0.381992	1.59233	0.0003	0.00534451	0.0041212	2910	tags=50%, list=34%, signal=34%	604/2213/11148/29126/958/2534/3109/3115/3559/7099/100/199/923/1051/1503/10457/3070/3280/8654/6441/6556/11326/301/384/79915/11119/6352/729230/4064/30835/952/970/972/942/1026/1141/1380/2322/3113/3146/3329/3485/3592/3593/3553/51561/3565/3567/3574/3575/3718/3965/5074/23228/5621/5788/6304/6385/7037/27242/7293/944/8744/7412/64115/7535
GO:1903708	BP	GO:1903708	positive regulation of hemopoiesis	103	0.40012	1.64442	0.00030012	0.00534451	0.0041212	2910	tags=52%, list=34%, signal=35%	604/64332/2113/3559/4254/677/100/558/760/1960/2353/2621/3398/3566/3624/3976/4602/128506/338382/5896/91/92/301/972/942/1435/11221/2124/2737/3142/3146/3592/3593/51561/3565/3567/3574/3575/182/3965/4323/114548/3276/5788/4920/8651/9840/7124/8744/9760/54209/10221/64115/7535
GO:0007188	BP	GO:0007188	adenylate cyclase-modulating G protein-coupled receptor signaling pathway	101	0.39543	1.62286	0.00030015	0.00534451	0.0041212	3099	tags=61%, list=36%, signal=40%	19/9590/133/493/3627/4886/30817/10203/4883/11251/577/79924/148/554/1268/1395/6373/1815/2357/2358/8811/2769/2774/54331/2852/2827/8477/2899/2912/2918/8685/5144/5732/5734/5739/5996/6915/7253/196883/112/113/115/575/576/283383/2015/976/10149/221188/84873/22859/23266/64123/134/147/146/150/151/152/154/11214/9495
GO:0071219	BP	GO:0071219	cellular response to molecule of bacterial origin	100	0.406688	1.6677	0.00030018	0.00534451	0.0041212	1847	tags=36%, list=21%, signal=29%	6347/5142/6348/19/968/1524/2213/929/29126/3627/2920/4360/7099/445/558/923/1019/1051/3576/10062/11093/824/6352/4064/942/1053/129607/1437/6373/10014/3146/3383/3592/3593/3553/345611
GO:0050792	BP	GO:0050792	regulation of viral process	74	0.427963	1.71941	0.000300571	0.00534451	0.0041212	2822	tags=51%, list=33%, signal=35%	6348/8519/4940/2934/3434/5091/91543/164668/1436/3576/3429/24138/10410/3669/3956/4599/5819/2494/4938/6590/7153/140564/60489/6352/972/8468/8091/27074/3965/11043/8638/5629/5702/5806/9126/7113/7124/11074
GO:0051017	BP	GO:0051017	actin filament bundle assembly	76	0.421722	1.6983	0.000300631	0.00534451	0.0041212	2708	tags=51%, list=31%, signal=36%	57175/388/1490/6624/8829/285590/11346/199/10391/4233/90102/389/171024/87/83543/395/7984/408/55616/23332/1809/221061/8477/3693/4739/5058/5074/221692/5358/5734/10411/28984/27289/8153/390/6385/10580/3925/79933
GO:0006986	BP	GO:0006986	response to unfolded protein	59	0.452133	1.78093	0.000301477	0.00534451	0.0041212	1783	tags=41%, list=21%, signal=32%	871/6347/79094/1649/440/153222/1491/3576/11015/23645/8614/7057/468/10018/10106/10595/30001/2134/3306/3310/27129/26353/3329/3336
GO:0030593	BP	GO:0030593	neutrophil chemotaxis	55	0.457517	1.78844	0.000301629	0.00534451	0.0041212	1866	tags=38%, list=22%, signal=30%	6347/5142/6348/414062/6280/3627/2920/23604/57580/6279/728/3576/6367/6352/972/6373/1907/3553/51561/3672/120425
GO:0009063	BP	GO:0009063	cellular amino acid catabolic process	57	0.463269	1.81755	0.000301689	0.00534451	0.0041212	1255	tags=33%, list=15%, signal=29%	259307/501/51268/10157/493/8528/84706/6472/6999/586/1491/2653/2875/5625/191/7915/384/642/57571
GO:0000079	BP	GO:0000079	regulation of cyclin-dependent protein serine/threonine kinase activity	51	0.465054	1.79989	0.000302602	0.00534451	0.0041212	1359	tags=41%, list=16%, signal=35%	9088/9134/993/990/641/1019/8851/1163/51191/3843/22924/5155/901/79616/81669/995/1026/1028/1032/1050/1164
GO:0019233	BP	GO:0019233	sensory perception of pain	49	0.470986	1.81436	0.000303122	0.00534451	0.0041212	2396	tags=49%, list=28%, signal=36%	6347/6348/4914/2534/11343/4886/55800/6335/23621/784/6387/2149/409/729230/1141/1268/2171/2906/3593/56925/4311/10874/5024/5724
GO:1901606	BP	GO:1901606	alpha-amino acid catabolic process	49	0.467159	1.79962	0.000303122	0.00534451	0.0041212	1761	tags=39%, list=20%, signal=31%	259307/501/51268/10157/493/8528/84706/6472/6999/2653/2875/5625/191/384/642/57571/10841/23464/3176
GO:0032368	BP	GO:0032368	regulation of lipid transport	47	0.48407	1.85406	0.000303582	0.00534451	0.0041212	1524	tags=38%, list=18%, signal=32%	9619/19/1588/1950/3690/5244/10396/1071/4035/4602/10062/6696/7057/158219/26154/114897/57540/151176
GO:0014909	BP	GO:0014909	smooth muscle cell migration	45	0.493364	1.87851	0.000303736	0.00534451	0.0041212	2320	tags=53%, list=27%, signal=39%	57175/3690/8829/7015/1636/199/3486/3488/4035/5031/5154/5155/6653/7448/9510/6352/780/9732/65009/8013/5058/55742/80310/5159
GO:0048864	BP	GO:0048864	stem cell development	41	0.503637	1.89034	0.000305281	0.00536327	0.00413566	2728	tags=66%, list=32%, signal=45%	4254/8829/2335/2348/3280/10500/8482/90/655/23603/182/84541/9221/3084/8828/5788/7869/10512/223117/6405/56920/64218/57715/9037/10501/6591/6949
GO:0031055	BP	GO:0031055	chromatin remodeling at centromere	35	0.524287	1.92764	0.000307094	0.00538666	0.0041537	2258	tags=60%, list=26%, signal=44%	8365/64946/55839/55166/79682/387103/3070/54069/1058/2491/64105/91687/79019/79172/201254/121504/8370/8366/23421/4678/11339
GO:0034308	BP	GO:0034308	primary alcohol metabolic process	32	0.542646	1.97025	0.000308896	0.00540979	0.00417154	1672	tags=50%, list=19%, signal=40%	1545/1645/1646/8644/650/9249/1109/1583/84532/55902/217/221/1543/1565/84649/2819
GO:0045071	BP	GO:0045071	negative regulation of viral genome replication	30	0.554016	1.98804	0.000310816	0.00543492	0.00419091	1282	tags=47%, list=15%, signal=40%	8519/4940/3434/91543/164668/24138/10410/3669/4599/4938/6590/140564/60489/6352
GO:0031371	CC	GO:0031371	ubiquitin conjugating enzyme complex	4	-0.959995	-2.35128	0.000313578	0.00545762	0.00420842	350	tags=100%, list=4%, signal=96%	7320/7334/7335
GO:0034035	BP	GO:0034035	purine ribonucleoside bisphosphate metabolic process	4	-0.906888	-2.22121	0.000313578	0.00545762	0.00420842	808	tags=100%, list=9%, signal=91%	6819/6820/8460
GO:0050427	BP	GO:0050427	3'-phosphoadenosine 5'-phosphosulfate metabolic process	4	-0.906888	-2.22121	0.000313578	0.00545762	0.00420842	808	tags=100%, list=9%, signal=91%	6819/6820/8460
GO:0071384	BP	GO:0071384	cellular response to corticosteroid stimulus	27	0.55957	1.96342	0.000314169	0.00545942	0.0042098	1909	tags=59%, list=22%, signal=46%	8644/358/54541/114907/677/445/153222/1978/5106/301/10018/8837/2322/2852/3383/687
GO:0002011	BP	GO:0002011	morphogenesis of an epithelial sheet	25	0.588416	2.03391	0.000315889	0.00547232	0.00421975	1448	tags=56%, list=17%, signal=47%	3678/94/84962/634/54567/1839/90102/389/655/3491/960/23332/1289/780
GO:0070169	BP	GO:0070169	positive regulation of biomineral tissue development	25	0.584509	2.02041	0.000315889	0.00547232	0.00421975	1576	tags=60%, list=18%, signal=49%	650/1051/91461/6546/7480/90/92/93/84059/468/655/659/3491/2201/26271
GO:0019829	MF	GO:0019829	cation-transporting ATPase activity	24	0.588816	2.01406	0.000318134	0.00548572	0.00423009	3315	tags=96%, list=38%, signal=59%	493/478/10396/491/516/245973/534/477/480/482/487/489/492/9914/506/514/518/515/92270/527/523/51382/538
GO:0022853	MF	GO:0022853	active ion transmembrane transporter activity	24	0.588816	2.01406	0.000318134	0.00548572	0.00423009	3315	tags=96%, list=38%, signal=59%	493/478/10396/491/516/245973/534/477/480/482/487/489/492/9914/506/514/518/515/92270/527/523/51382/538
GO:0042625	MF	GO:0042625	ATPase coupled ion transmembrane transporter activity	24	0.588816	2.01406	0.000318134	0.00548572	0.00423009	3315	tags=96%, list=38%, signal=59%	493/478/10396/491/516/245973/534/477/480/482/487/489/492/9914/506/514/518/515/92270/527/523/51382/538
GO:0042771	BP	GO:0042771	intrinsic apoptotic signaling pathway in response to DNA damage by p53 class mediator	23	0.581017	1.97096	0.000319251	0.00549652	0.00423841	1511	tags=57%, list=18%, signal=47%	26471/54541/4436/4582/675/28996/64782/79915/602/960/972/1026/80237
GO:0006220	BP	GO:0006220	pyrimidine nucleotide metabolic process	22	0.603611	2.02325	0.000321819	0.00552374	0.0042594	1669	tags=64%, list=19%, signal=51%	7298/1503/79077/1841/1854/5169/4830/4833/7374/7378/56895/129607/1633/84803
GO:0048286	BP	GO:0048286	lung alveolus development	22	0.594423	1.99245	0.000321819	0.00552374	0.0042594	1501	tags=55%, list=17%, signal=45%	100/3488/3976/5154/91461/6441/23657/55151/64759/26154/659/1907
GO:0002834	BP	GO:0002834	regulation of response to tumor cell	9	0.742844	1.98782	0.000366659	0.00627412	0.00483803	1814	tags=89%, list=21%, signal=70%	29126/634/5819/10666/3146/3329/3592/3593
GO:0002837	BP	GO:0002837	regulation of immune response to tumor cell	9	0.742844	1.98782	0.000366659	0.00627412	0.00483803	1814	tags=89%, list=21%, signal=70%	29126/634/5819/10666/3146/3329/3592/3593
GO:2000427	BP	GO:2000427	positive regulation of apoptotic cell clearance	7	0.816658	2.02479	0.000385356	0.00658401	0.00507698	410	tags=71%, list=5%, signal=68%	6347/717/718/720/721
GO:0000491	BP	GO:0000491	small nucleolar ribonucleoprotein complex assembly	6	-0.780445	-2.3251	0.000397931	0.00661712	0.00510252	1900	tags=100%, list=22%, signal=78%	8607/10856/4809/6880/9326
GO:0000492	BP	GO:0000492	box C/D snoRNP assembly	6	-0.780445	-2.3251	0.000397931	0.00661712	0.00510252	1900	tags=100%, list=22%, signal=78%	8607/10856/4809/6880/9326
GO:0000280	BP	GO:0000280	nuclear division	190	0.36534	1.54787	0.00039996	0.00661712	0.00510252	2860	tags=48%, list=33%, signal=33%	1950/9088/83990/9134/990/2177/23397/5888/8438/675/699/168448/113130/81620/146956/3976/4085/84930/84057/27085/4605/55706/5155/29893/5889/10592/54908/400629/7153/7273/11130/332/655/79866/685/9184/8555/995/55143/1028/64105/201254/1111/1164/23332/11144/79075/79980/1843/9700/2175/57697/286151/26271/63979/2827/83903/3306/3553/3835/11004/24137/3833/90417/9735/4603/440145/23310/64151/4751/83540/5159/5810…
GO:0005925	CC	GO:0005925	focal adhesion	194	0.363342	1.54083	0.00039996	0.00661712	0.00510252	2533	tags=42%, list=29%, signal=30%	57175/8496/9590/57514/3690/388/58480/5244/726/1803/2934/3678/3655/8516/8829/8470/165904/84962/58504/83478/9564/10391/4921/2037/2261/3696/4035/5819/90102/10544/22800/171024/7041/7052/64759/8936/87/83543/301/55616/824/857/960/928/11135/23332/23603/8895/1466/2017/23191/1601/2022/1969/54751/10979/2274/23769/2535/3159/3383/3672/3691/3693/3695/4026/4311/4323/10787/4739/23114/4810/5058/55742/5159/9260/5…
GO:0007204	BP	GO:0007204	positive regulation of cytosolic calcium ion concentration	144	0.373595	1.56434	0.00039996	0.00661712	0.00510252	2828	tags=48%, list=33%, signal=33%	6348/1524/133/493/3627/1649/2534/2841/9290/11346/728/773/784/825/10800/1742/2149/4035/5026/5031/6546/7052/55151/148/9472/187/114897/857/729230/952/10518/1193/1268/6373/1907/30001/2151/9002/2357/2358/8811/2769/2852/2828/8477/2906/9001/3146/3270/3708/56704/4828/10874/5021/5024/5144/8398/5621/5732/5734/5739/5788/22821/6261/6915/7070/53373/10345/54795
GO:0008202	BP	GO:0008202	steroid metabolic process	137	0.376494	1.57286	0.00039996	0.00661712	0.00510252	1825	tags=35%, list=21%, signal=28%	9619/1545/19/1645/1646/1588/133/8644/650/51171/39/1109/1071/1583/3490/3638/4036/2494/114880/6097/6319/6653/6696/158219/7436/7533/10449/31/8542/1050/54982/1543/1548/1565/84649/1717/57540/10682/10613/2222/2224/2246/2264/3157/3291/7923/3553/3565
GO:0019637	BP	GO:0019637	organophosphate metabolic process	419	0.312553	1.35456	0.00039996	0.00661712	0.00510252	3109	tags=46%, list=36%, signal=31%	5142/83666/272/26471/51268/8605/23682/10157/54541/5168/4436/4837/114884/6241/6472/6999/7298/11332/6296/100/84962/246/554235/1071/548596/1159/1436/1503/79077/1841/1854/5169/2203/2261/2617/2822/3613/4200/84879/55706/4830/4833/54981/4521/79023/5031/8654/5154/5155/5166/5226/113791/51365/6240/6319/81537/9021/9414/7083/55151/7374/7378/57406/31/23305/84532/55902/56895/205/7915/230/377/516/824/952/983/12…
GO:0030003	BP	GO:0030003	cellular cation homeostasis	276	0.335083	1.43827	0.00039996	0.00661712	0.00510252	2828	tags=43%, list=33%, signal=30%	6348/793/1524/23682/6280/133/84239/493/958/3627/1649/2534/2841/9290/5579/6279/11346/9429/478/728/760/773/784/825/6387/10800/1742/2149/9843/3162/4035/4502/5026/5031/6556/1318/113235/83697/6546/285195/8614/7052/55151/148/9472/187/468/491/245973/534/114897/794/857/6352/729230/952/10518/1193/1203/54982/1268/6373/79901/27185/23312/1815/1907/151176/30001/2151/9002/2357/2358/8811/10539/2769/2852/2828/84…
GO:0048608	BP	GO:0048608	reproductive structure development	199	0.360637	1.53069	0.00039996	0.00661712	0.00510252	2490	tags=42%, list=29%, signal=30%	1588/2034/4914/26471/133/8644/83990/55840/4254/4436/639/5270/677/100/558/675/1051/10370/1299/2057/3280/3624/3696/3976/4036/4521/51294/5155/10733/5872/6240/9021/6696/8614/400629/8743/22846/7422/92/9510/301/367/408/409/10018/655/659/3491/1028/1050/1437/11144/79733/2175/2189/2288/10272/2707/2735/2737/3157/3205/5654/3383/3623/3726/3856/4188/4311/4323/4327/4678/7026/8204/5159/5333/59338/5740/5764/5806…
GO:0048732	BP	GO:0048732	gland development	188	0.36174	1.53204	0.00039996	0.00661712	0.00510252	1808	tags=36%, list=21%, signal=29%	1588/1950/650/55840/2113/8829/4939/5270/7298/100/440/445/675/999/634/1051/10370/1436/2119/3280/8820/3082/3162/3398/3488/128239/8997/4233/4830/5106/5111/5154/5896/7049/7052/7422/7448/205/301/8862/367/10018/655/857/1028/1050/1054/8837/1435/1543/1628/780/123872/79733/1896/1969/80004/2146/2288/10272/2735/2737/3077/3099/3142/3157/3205/3321
GO:0051130	BP	GO:0051130	positive regulation of cellular component organization	545	0.305838	1.33151	0.00039996	0.00661712	0.00510252	2813	tags=39%, list=33%, signal=28%	6347/57175/7162/19/347902/604/1950/2213/4914/58480/6280/5244/27113/672/1490/929/10602/5168/342184/6624/2534/2934/3655/4582/8829/57580/285590/57698/11346/7099/347733/84962/246/348110/10396/558/90427/717/718/720/721/113130/8851/81620/1307/1496/6387/4921/1742/26052/139818/1869/2043/2237/2335/54874/100132074/2621/9535/3082/3601/3560/3566/6453/8997/3976/4035/4233/4318/143098/4602/4830/128506/5063/5155…
GO:0060429	BP	GO:0060429	epithelium development	526	0.309773	1.34813	0.00039996	0.00661712	0.00510252	2800	tags=40%, list=32%, signal=29%	1645/1646/793/1952/1950/10855/4914/4983/26227/388/133/8644/650/3627/342184/3678/3872/23764/8829/639/5270/7298/677/81569/94/84962/360/675/760/768/634/1051/10370/1436/1522/54567/2043/2119/79633/2348/10468/1839/57493/3280/8820/3082/3398/3488/3624/128239/338785/144501/3887/3892/3976/4036/4233/4318/2494/5106/5111/5046/5154/5155/5175/90102/10733/10213/5872/389/81537/23657/9021/10253/90627/8407/7062/704…
GO:0009410	BP	GO:0009410	response to xenobiotic stimulus	125	0.378371	1.57326	0.0004	0.00661712	0.00510252	1788	tags=34%, list=21%, signal=27%	2052/1545/1645/26227/5244/358/54541/114907/2941/5742/6999/100/199/445/134147/1393/1869/1978/2678/4176/1728/5106/5111/5155/6097/6546/55151/91703/57491/8837/1141/1268/1543/1548/1565/29785/1815/2690/10014/3176/9455/3383
GO:0010948	BP	GO:0010948	negative regulation of cell cycle process	153	0.375398	1.57691	0.0004	0.00661712	0.00510252	1675	tags=35%, list=19%, signal=29%	6347/604/672/990/63967/4582/4998/7703/5888/5933/6241/677/641/699/1017/1019/81620/51514/1869/10457/3976/4085/27085/5111/10769/10213/54908/7027/90381/655/84446/7832/9184/387695/23468/8555/995/983/1021/1026/1032/1111/10106/10217/29980/1843/79733/9700/2124/2146/286151/26271/2852/29933
GO:0016054	BP	GO:0016054	organic acid catabolic process	107	0.392099	1.61603	0.00040008	0.00661712	0.00510252	1791	tags=36%, list=21%, signal=28%	259307/501/51268/10157/493/23670/8528/84706/6472/6999/39/586/1491/4051/2653/2875/166785/5106/5226/5625/225/84696/10449/55289/191/160428/7915/384/56898/642/57571/960/1268/55268/10841/23464/3176/414328
GO:0046395	BP	GO:0046395	carboxylic acid catabolic process	107	0.392099	1.61603	0.00040008	0.00661712	0.00510252	1791	tags=36%, list=21%, signal=28%	259307/501/51268/10157/493/23670/8528/84706/6472/6999/39/586/1491/4051/2653/2875/166785/5106/5226/5625/225/84696/10449/55289/191/160428/7915/384/56898/642/57571/960/1268/55268/10841/23464/3176/414328
GO:0015850	BP	GO:0015850	organic hydroxy compound transport	100	0.398396	1.63369	0.00040024	0.00661712	0.00510252	3064	tags=54%, list=36%, signal=35%	9619/19/1645/1588/1950/3690/5244/358/114884/1109/360/634/1071/6387/4035/4602/10062/114880/140606/9194/23539/11309/6696/158219/26154/8714/114897/857/8973/1141/1268/1815/3745/3949/23762/114879/5021/5023/65018/6566/6581/6526/6531/51760/127833/18/20/23461/10347/64240/60/150/151/152
GO:0030323	BP	GO:0030323	respiratory tube development	95	0.400372	1.63736	0.00040028	0.00661712	0.00510252	1648	tags=38%, list=19%, signal=31%	6678/2034/1490/1116/100/1522/1978/57493/3280/3488/3976/407975/5154/91461/6441/23657/10253/55151/64759/7422/26154/93/9719/659/1050/83716/1512/1717/123872/1907/80004/2246/8817/10272/2735/2737
GO:0045619	BP	GO:0045619	regulation of lymphocyte differentiation	95	0.402382	1.64558	0.00040028	0.00661712	0.00510252	2917	tags=53%, list=34%, signal=35%	604/64332/2177/3559/639/677/100/558/1960/10875/2621/3398/3566/3624/3902/407975/4602/5896/6935/301/729230/972/942/11221/2175/2737/3142/3146/3592/3593/51561/3565/3574/3575/3623/3662/3718/3965/4323/114548/5788/56833/57864/8651/9840/8744/9760/64115/7535/678
GO:0031345	BP	GO:0031345	negative regulation of cell projection organization	89	0.405674	1.65151	0.0004004	0.00661712	0.00510252	2742	tags=51%, list=32%, signal=35%	2534/8829/349667/348110/8851/1522/26052/1942/2043/2258/81618/3956/4035/4133/4974/10769/10500/8482/6696/10253/7533/53335/952/23258/22943/1809/1949/2288/83999/54413/5621/5909/23108/65078/7869/10512/223117/6405/56920/64218/57715/9037/10501/112755/7070
GO:0043177	MF	GO:0043177	organic acid binding	88	0.411746	1.67407	0.00040044	0.00661712	0.00510252	2595	tags=48%, list=30%, signal=34%	1645/1646/6280/1719/8974/5091/6279/6472/6999/7298/445/338557/2348/3043/143686/113235/55289/241/63827/652968/960/112399/2171/10841/27232/145864/3045/3042/3157/3399/50939/286256/162417/7026/10536/23569/5730/65078/83667/114132/6573/6507
GO:0002822	BP	GO:0002822	regulation of adaptive immune response based on somatic recombination of immune receptors built from immunoglobulin superfamily domains	76	0.421051	1.6956	0.000400842	0.00661712	0.00510252	1862	tags=42%, list=22%, signal=33%	604/2213/64332/29126/958/4436/91543/100/718/634/3566/5819/6556/301/79915/729230/911/10666/3077/3134/3142/3146/3329/3592/3593/8809/3553/9173/51561/3565/3575/3718
GO:0035966	BP	GO:0035966	response to topologically incorrect protein	63	0.443869	1.75849	0.000401405	0.00661712	0.00510252	1783	tags=40%, list=21%, signal=32%	871/6347/79094/1649/440/153222/1491/3576/2161/11015/23645/8614/7057/468/10018/10106/10595/30001/2134/3306/3310/27129/26353/3329/3336
GO:1990266	BP	GO:1990266	neutrophil migration	61	0.443206	1.75029	0.000401485	0.00661712	0.00510252	1866	tags=38%, list=22%, signal=30%	6347/5142/6348/414062/6280/3627/2920/23604/57580/6279/728/3576/5175/6367/6352/57126/972/6373/1907/3553/51561/3672/120425
GO:0061387	BP	GO:0061387	regulation of extent of cell growth	56	0.454292	1.77836	0.000402131	0.00661802	0.00510321	2545	tags=55%, list=29%, signal=39%	8829/57698/8851/6387/2258/2335/4035/4133/4897/10500/8482/6696/7422/627/659/2017/23191/27185/5058/91584/8153/65078/7869/10512/223117/6405/56920/64218/57715/9037/10501
GO:0008630	BP	GO:0008630	intrinsic apoptotic signaling pathway in response to DNA damage	52	0.464502	1.80192	0.000403226	0.00662628	0.00510958	1520	tags=42%, list=18%, signal=35%	26471/672/54541/4436/4582/597/675/6387/220042/1869/28996/3162/64782/79915/10018/602/960/972/1026/1032/80237/1969
GO:0030316	BP	GO:0030316	osteoclast differentiation	50	0.467232	1.80292	0.000403836	0.00662659	0.00510982	2813	tags=60%, list=33%, signal=41%	6348/9290/7099/760/1051/1436/2353/4853/128506/9644/29887/632/135228/51208/1435/1969/2200/27086/10272/3593/51561/3565/3726/10234/9935/4763/7037/7098/7124/54209
GO:0002504	BP	GO:0002504	antigen processing and presentation of peptide or polysaccharide antigen via MHC class II	47	0.473744	1.81451	0.000404776	0.00663229	0.00511421	1905	tags=47%, list=22%, signal=37%	2213/3109/3115/3119/3122/3127/3108/3117/3902/7057/8905/972/1520/3113/3120/3123/56992/3835/26153/11004/24137/64837
GO:0004222	MF	GO:0004222	metalloendopeptidase activity	42	0.49733	1.87339	0.000406463	0.00663279	0.0051146	3027	tags=76%, list=35%, signal=50%	10863/4320/4318/115209/7064/8038/8745/27299/9510/81794/11093/11173/4311/4322/4323/4327/64386/4185/8728/8748/8747/80332/8754/170689/170691/170692/9508/9507/11096/11174/11095/56999
GO:2000106	BP	GO:2000106	regulation of leukocyte apoptotic process	42	0.500052	1.88364	0.000406463	0.00663279	0.0051146	1945	tags=50%, list=23%, signal=39%	1831/604/29126/3665/4254/100/558/6387/1942/2621/407975/5896/23657/301/384/6352/972/27086/3575/3718/3965
GO:0004197	MF	GO:0004197	cysteine-type endopeptidase activity	38	0.514925	1.91561	0.000407872	0.00663279	0.0051146	1533	tags=50%, list=18%, signal=41%	726/837/825/1519/1522/11274/373856/79747/642/147968/824/827/838/8837/1512/1513/1520/1521/9700
GO:0006336	BP	GO:0006336	DNA replication-independent nucleosome assembly	38	0.514345	1.91345	0.000407872	0.00663279	0.0051146	2258	tags=58%, list=26%, signal=43%	55723/8365/64946/55839/55166/79682/387103/8520/54069/1058/2491/64105/91687/79019/79172/201254/121504/8370/8366/23421/4678/11339
GO:0034724	BP	GO:0034724	DNA replication-independent nucleosome organization	38	0.514345	1.91345	0.000407872	0.00663279	0.0051146	2258	tags=58%, list=26%, signal=43%	55723/8365/64946/55839/55166/79682/387103/8520/54069/1058/2491/64105/91687/79019/79172/201254/121504/8370/8366/23421/4678/11339
GO:0050922	BP	GO:0050922	negative regulation of chemotaxis	37	0.514165	1.90381	0.000408956	0.00663279	0.0051146	2585	tags=59%, list=30%, signal=42%	6347/57175/1588/2841/8829/199/10500/8482/7057/727/1843/11240/7869/10512/223117/6405/56920/64218/57715/9037/10501/56833
GO:1901655	BP	GO:1901655	cellular response to ketone	37	0.513336	1.90074	0.000408956	0.00663279	0.0051146	1909	tags=51%, list=22%, signal=40%	1646/8644/358/54541/114907/445/1019/1978/5031/5106/6696/31/367/8837/28960/54331/3383/9314/687
GO:1903053	BP	GO:1903053	regulation of extracellular matrix organization	24	0.572011	1.95658	0.000424178	0.00686972	0.0052973	1585	tags=54%, list=18%, signal=44%	84168/1803/2113/6624/4921/4035/23187/90102/165/8837/23332/780/2264
GO:0005839	CC	GO:0005839	proteasome core complex	7	-0.804083	-2.57449	0.00045106	0.007284	0.00561675	1697	tags=100%, list=20%, signal=80%	5683/5686/5691/5693/5694/5695
GO:0010499	BP	GO:0010499	proteasomal ubiquitin-independent protein catabolic process	7	-0.804083	-2.57449	0.00045106	0.007284	0.00561675	1697	tags=100%, list=20%, signal=80%	5683/5686/5691/5693/5694/5695
GO:0000811	CC	GO:0000811	GINS complex	3	0.933565	1.77758	0.000460264	0.00736883	0.00568217	576	tags=100%, list=7%, signal=93%	9837/51659/84296
GO:0002399	BP	GO:0002399	MHC class II protein complex assembly	3	0.929739	1.77029	0.000460264	0.00736883	0.00568217	609	tags=100%, list=7%, signal=93%	3109/3122/3108
GO:0002501	BP	GO:0002501	peptide antigen assembly with MHC protein complex	3	0.929739	1.77029	0.000460264	0.00736883	0.00568217	609	tags=100%, list=7%, signal=93%	3109/3122/3108
GO:0002503	BP	GO:0002503	peptide antigen assembly with MHC class II protein complex	3	0.929739	1.77029	0.000460264	0.00736883	0.00568217	609	tags=100%, list=7%, signal=93%	3109/3122/3108
GO:0003839	MF	GO:0003839	gamma-glutamylcyclotransferase activity	3	0.933797	1.77802	0.000460264	0.00736883	0.00568217	574	tags=100%, list=7%, signal=93%	79094/494143/79017
GO:0097677	MF	GO:0097677	STAT family protein binding	3	0.919483	1.75077	0.000460264	0.00736883	0.00568217	33	tags=67%, list=0%, signal=66%	151636/83666
GO:0004298	MF	GO:0004298	threonine-type endopeptidase activity	8	-0.803132	-2.7488	0.000491642	0.00784874	0.00605223	1706	tags=100%, list=20%, signal=80%	5682/5683/5686/5691/5693/5694/5695
GO:0070003	MF	GO:0070003	threonine-type peptidase activity	8	-0.803132	-2.7488	0.000491642	0.00784874	0.00605223	1706	tags=100%, list=20%, signal=80%	5682/5683/5686/5691/5693/5694/5695
GO:0006811	BP	GO:0006811	ion transport	737	0.297065	1.30009	0.00049995	0.00786987	0.00606852	2974	tags=41%, list=34%, signal=29%	6347/3790/5142/9619/6348/1831/19/1645/1950/3690/6329/8140/23428/140738/5244/358/84239/493/51063/1490/3627/1649/2534/2564/2669/114884/5579/6236/55800/6330/6335/5270/144195/10350/9429/1636/100/1109/306/23120/57205/478/10396/57198/377677/760/768/773/55799/784/785/10203/254228/825/1017/634/1051/1071/1180/1393/6387/10800/1742/2149/2258/2348/2565/2570/2621/10755/2894/3043/9843/3757/9132/56479/54800/403…
GO:0030098	BP	GO:0030098	lymphocyte differentiation	181	0.359971	1.52205	0.00049995	0.00786987	0.00606852	2917	tags=47%, list=34%, signal=32%	604/29760/2213/64332/4914/2177/2841/3559/4436/639/57580/91543/677/100/558/54567/139818/1960/10875/2621/3398/3566/3624/3902/3956/407975/4602/4853/5896/6097/6935/301/602/729230/972/942/925/1021/1054/112616/1380/11221/2175/2322/27086/2737/10014/3142/3146/3589/3592/3593/8809/51561/3565/3574/3575/3623/3662/3718/3965/4063/9935/4323/114548/23228/5734/5788/5795/6095/6304/64218/56833/57864/8651/6932/9840/…
GO:0044248	BP	GO:0044248	cellular catabolic process	754	0.293531	1.28481	0.00049995	0.00786987	0.00606852	2917	tags=39%, list=34%, signal=28%	2052/5142/1545/151636/259307/501/272/1950/85441/10855/26471/4983/51268/8605/6280/340061/10157/8644/493/23670/79094/23604/1649/54541/8528/11067/5168/84706/4210/11343/4939/80183/6279/6472/6999/677/39/1636/11332/100/51816/290/164668/554235/586/644/90427/1017/8851/494143/1491/1519/1522/4051/79077/1763/51514/1854/1869/1942/5169/2043/2203/2237/54874/2653/2678/10755/2822/2875/3043/3082/28996/3162/3429/3…
GO:0048018	MF	GO:0048018	receptor ligand activity	211	0.348457	1.48285	0.00049995	0.00786987	0.00606852	2788	tags=45%, list=32%, signal=31%	6347/6348/414062/1950/133/650/1490/3627/2920/83729/4254/51816/6387/3576/2258/2621/9535/10457/64388/1839/3082/3624/3976/5154/5155/6398/10500/8482/6696/8614/8743/9966/7422/7480/79924/8862/627/655/685/387695/727/6367/6352/970/441549/6320/112616/1435/1437/6373/199699/22943/1907/2202/8909/151176/2200/2246/8817/2896/3146/3589/3592/3593/3553/51561/9235/3565/3567/3574/3623/3626/182/4828/3084/56034/80310/…
GO:0061061	BP	GO:0061061	muscle structure development	293	0.328881	1.4129	0.00049995	0.00786987	0.00606852	2381	tags=38%, list=28%, signal=28%	26509/2034/4606/26471/133/650/3627/1649/8516/23764/8470/85461/677/51676/445/27101/825/1491/1496/54567/1841/1959/1960/2065/51725/2353/1839/57493/3280/3486/3488/3566/3679/3956/3976/4036/5600/407975/58529/10529/84033/5155/8819/6474/6546/6272/7004/7049/29767/7273/10791/7422/7480/6935/90/8038/577/148/9472/57538/60529/409/283149/627/274/694/7832/8536/824/857/928/1013/983/8837/1466/22943/2022/2146/2535/…
GO:0072503	BP	GO:0072503	cellular divalent inorganic cation homeostasis	212	0.347365	1.47851	0.00049995	0.00786987	0.00606852	2828	tags=44%, list=33%, signal=31%	6348/793/1524/6280/133/84239/493/958/3627/1649/2534/2841/9290/5579/6279/11346/728/773/784/825/6387/10800/1742/2149/4035/4502/5026/5031/6556/6546/8614/7052/55151/148/9472/187/468/491/114897/794/857/6352/729230/952/10518/1193/1268/6373/27185/1815/1907/30001/2151/9002/2357/2358/8811/2769/2852/2828/8477/2906/9001/3146/3270/3708/56704/3741/55013/4493/4828/10874/5021/5023/5024/5144/5314/8398/5621/5732/…
GO:0006631	BP	GO:0006631	fatty acid metabolic process	156	0.368097	1.54779	0.0005	0.00786987	0.00606852	3000	tags=52%, list=35%, signal=34%	1545/1646/8605/8644/672/11343/5742/39/11332/6296/1109/246/718/634/4051/2678/401494/3638/166785/10062/5106/5166/6319/225/84696/10449/31/55289/23305/84532/55902/7915/240/241/301/313/56898/857/972/1268/1543/1548/1565/29785/747/221955/84649/55268/1907/151176/10613/2171/9415/3248/7923/3553/344967/64900/51085/8013/5445/53632/5730/9536/5740/22949/79966/83667/85414/6720/57761/215/33/38/47/134526/51/80221…
GO:0051321	BP	GO:0051321	meiotic cell cycle	109	0.389741	1.60834	0.00050005	0.00786987	0.00606852	2850	tags=50%, list=33%, signal=34%	9088/83990/9134/993/2177/23397/5888/8438/675/699/1017/146956/9156/3976/84930/84057/55706/29893/5889/10592/400629/7153/7516/9184/995/201254/1164/11144/1843/9700/2175/57697/286151/26271/63979/8468/2827/3306/2956/4603/23310/4751/83540/5810/5890/25788/5932/9985/151246/9126/10734/56155/9319/7283
GO:1901991	BP	GO:1901991	negative regulation of mitotic cell cycle phase transition	107	0.385799	1.59007	0.0005001	0.00786987	0.00606852	1756	tags=36%, list=20%, signal=29%	6347/672/990/63967/4582/4998/5933/677/641/699/1017/1019/81620/1869/10457/4085/5111/10769/10213/54908/7027/90381/84446/7832/9184/995/983/1021/1026/1032/10106/10217/29980/1843/79733/2146/26271/29933/8091
GO:0005802	CC	GO:0005802	trans-Golgi network	82	0.409506	1.65909	0.000500701	0.00786987	0.00606852	2446	tags=46%, list=28%, signal=34%	9435/23682/79094/3115/3119/3122/3127/10396/23621/25825/8938/999/3117/59352/5872/338382/6653/7045/8905/113451/972/8218/23258/2852/2896/3113/3120/3123/57535/63971/4311/23057/27344/5125/122618/11031/10981/54715
GO:0016064	BP	GO:0016064	immunoglobulin mediated immune response	82	0.406516	1.64698	0.000500701	0.00786987	0.00606852	1825	tags=38%, list=21%, signal=30%	604/2213/958/3119/3665/4436/51279/716/717/718/720/721/9156/10875/3543/3566/5819/710/28526/7374/79915/602/727/10666/972/1380/3329/3493/3494/3514/3565
GO:1901657	BP	GO:1901657	glycosyl compound metabolic process	62	0.447654	1.77022	0.000501857	0.00787697	0.006074	1134	tags=34%, list=13%, signal=30%	1645/1646/272/56952/8644/100/51816/1109/164668/1503/1841/4830/4833/9414/7083/7378/191/205/51074/140564/60489
GO:0002286	BP	GO:0002286	T cell activation involved in immune response	57	0.447303	1.75491	0.000502816	0.00788097	0.00607708	2542	tags=53%, list=29%, signal=37%	604/2213/64332/3109/634/10875/3566/4602/6097/6556/301/602/911/942/27086/3142/3146/3383/3593/8809/51561/3662/3683/3718/3965/4063/114548/5734/6095/64218
GO:0014031	BP	GO:0014031	mesenchymal cell development	40	0.498708	1.86596	0.000508958	0.00790926	0.0060989	2728	tags=65%, list=32%, signal=45%	4254/8829/2335/2348/3280/10500/8482/90/655/23603/182/84541/9221/3084/8828/7869/10512/223117/6405/56920/64218/57715/9037/10501/6591/6949
GO:0014032	BP	GO:0014032	neural crest cell development	40	0.498708	1.86596	0.000508958	0.00790926	0.0060989	2728	tags=65%, list=32%, signal=45%	4254/8829/2335/2348/3280/10500/8482/90/655/23603/182/84541/9221/3084/8828/7869/10512/223117/6405/56920/64218/57715/9037/10501/6591/6949
GO:0070167	BP	GO:0070167	regulation of biomineral tissue development	40	0.494376	1.84975	0.000508958	0.00790926	0.0060989	1576	tags=48%, list=18%, signal=39%	6348/650/1051/4921/2621/91461/6546/7480/90/92/93/84059/468/632/655/659/3491/2201/26271
GO:0014910	BP	GO:0014910	regulation of smooth muscle cell migration	39	0.494832	1.84741	0.000509736	0.00790926	0.0060989	2320	tags=54%, list=27%, signal=40%	57175/8829/7015/1636/199/3486/3488/4035/5031/5154/5155/6653/7448/9510/6352/9732/65009/8013/5058/80310/5159
GO:0034508	BP	GO:0034508	centromere complex assembly	36	0.512369	1.89336	0.000511247	0.00790926	0.0060989	2258	tags=58%, list=26%, signal=43%	8365/64946/55839/55166/79682/387103/3070/54069/1058/2491/64105/91687/79019/79172/201254/121504/8370/8366/23421/4678/11339
GO:0004032	MF	GO:0004032	alditol:NADP+ 1-oxidoreductase activity	7	0.809517	2.00709	0.000513809	0.00790926	0.0060989	353	tags=57%, list=4%, signal=55%	1645/1646/8644/1109
GO:0010875	BP	GO:0010875	positive regulation of cholesterol efflux	7	0.784242	1.94442	0.000513809	0.00790926	0.0060989	1044	tags=71%, list=12%, signal=63%	9619/19/4035/10062/26154
GO:0017002	MF	GO:0017002	activin-activated receptor activity	7	0.789956	1.95859	0.000513809	0.00790926	0.0060989	1201	tags=86%, list=14%, signal=74%	94/90/91/92/93/659
GO:0017014	BP	GO:0017014	protein nitrosylation	7	0.803131	1.99126	0.000513809	0.00790926	0.0060989	340	tags=57%, list=4%, signal=55%	6280/493/6279/1636
GO:0018119	BP	GO:0018119	peptidyl-cysteine S-nitrosylation	7	0.803131	1.99126	0.000513809	0.00790926	0.0060989	340	tags=57%, list=4%, signal=55%	6280/493/6279/1636
GO:0031298	CC	GO:0031298	replication fork protection complex	7	0.79496	1.971	0.000513809	0.00790926	0.0060989	1024	tags=86%, list=12%, signal=76%	8318/51659/55388/84296/54962/11169
GO:0048711	BP	GO:0048711	positive regulation of astrocyte differentiation	7	0.811965	2.01316	0.000513809	0.00790926	0.0060989	1196	tags=86%, list=14%, signal=74%	650/5270/3280/3398/3976/274
GO:1901841	BP	GO:1901841	regulation of high voltage-gated calcium channel activity	7	0.809005	2.00582	0.000513809	0.00790926	0.0060989	419	tags=57%, list=5%, signal=54%	5142/2669/6236/784
GO:0050840	MF	GO:0050840	extracellular matrix binding	30	0.53925	1.93505	0.000518027	0.00796325	0.00614053	1422	tags=43%, list=16%, signal=36%	6678/3690/9806/3655/3956/169611/6696/7045/7057/7422/7448/3491/1520
GO:0032488	BP	GO:0032488	Cdc42 protein signal transduction	6	0.822696	1.93688	0.000534117	0.00818808	0.0063139	301	tags=67%, list=3%, signal=64%	19/58480/8829/57698
GO:0051126	BP	GO:0051126	negative regulation of actin nucleation	6	0.822199	1.93571	0.000534117	0.00818808	0.0063139	579	tags=67%, list=7%, signal=62%	57175/348110/1496/9535
GO:0006984	BP	GO:0006984	ER-nucleus signaling pathway	15	0.652326	1.99702	0.00056224	0.00860742	0.00663726	1527	tags=60%, list=18%, signal=49%	6347/1649/440/3576/3638/23645/468/10018/10613
GO:0002347	BP	GO:0002347	response to tumor cell	14	0.66507	2.00161	0.000569282	0.00870332	0.0067112	2114	tags=86%, list=25%, signal=65%	29126/634/5819/5551/27303/10666/3146/3176/3329/3592/3593/100507436
GO:0002605	BP	GO:0002605	negative regulation of dendritic cell antigen processing and presentation	4	0.888335	1.83394	0.000587027	0.00895805	0.00690762	967	tags=100%, list=11%, signal=89%	968/2213/10875/7057
GO:0002418	BP	GO:0002418	immune response to tumor cell	11	0.71737	2.02862	0.000587544	0.00895805	0.00690762	2114	tags=91%, list=25%, signal=69%	29126/634/5819/5551/10666/3146/3329/3592/3593/100507436
GO:0030949	BP	GO:0030949	positive regulation of vascular endothelial growth factor receptor signaling pathway	10	0.715784	1.97095	0.000598015	0.00907071	0.0069945	1819	tags=80%, list=21%, signal=63%	3690/3678/5579/7422/7448/8817/2887/3553
GO:0004857	MF	GO:0004857	enzyme inhibitor activity	151	0.367616	1.54304	0.00059994	0.00907071	0.0069945	2897	tags=46%, list=34%, signal=31%	871/151636/83666/5627/9467/9806/493/5272/5270/23145/2/306/718/720/721/114794/2621/9535/389119/3843/58529/710/153769/6590/9021/10253/7078/51377/51129/3730/81611/301/307/408/332/727/135228/1026/1028/1032/340267/286204/26271/10129/124790/388324/3700/56925/51686/27344/221692/9749/11142/9858/5764/5918/5273/5055/8651/6691/7076/10188/10221/28951/57761/10628/89766/7453/58189/124857
GO:0006898	BP	GO:0006898	receptor-mediated endocytosis	136	0.37516	1.56675	0.00059994	0.00907071	0.0069945	1825	tags=35%, list=21%, signal=28%	6678/1950/2213/3690/4983/133/929/4360/718/10203/634/3576/1742/26052/54874/2348/3043/4035/4036/6441/6653/7422/7436/7448/8936/8862/8542/407/408/409/857/9332/50489/928/8218/2017/1601/22943/1815/2358/3077/3092/3240/3250/3493/3494/3514/3565
GO:0040008	BP	GO:0040008	regulation of growth	273	0.33081	1.41922	0.00059994	0.00907071	0.0069945	2920	tags=44%, list=34%, signal=30%	6414/604/6280/55840/3872/4886/8829/6279/5270/285590/57698/94/9564/825/1019/8851/634/6387/1848/2203/2258/2261/2335/2621/1839/3486/3487/3488/3490/3624/4035/4133/5600/407975/4502/58529/4853/4897/10235/10500/8482/6446/10110/9021/6696/54879/8614/7049/7422/8089/91/9472/367/53335/10018/627/659/694/952/54825/983/1026/1032/9746/1435/2017/23191/780/27185/11221/23136/83481/23404/10516/2690/2735/3142/8091/34…
GO:0051052	BP	GO:0051052	regulation of DNA metabolic process	182	0.360157	1.52333	0.00059994	0.00907071	0.0069945	1828	tags=35%, list=21%, signal=28%	151636/83666/604/157570/672/958/990/2187/4436/5888/5983/94/306/79000/641/675/27101/1017/81620/1763/3082/54069/5063/55010/5111/5155/10721/5982/5984/5985/116028/7027/90381/54962/10189/409/79915/659/55704/10576/983/1026/1054/1111/10926/29980/79075/1843/79733/26271/2264/63979/2305/2735/51053/2852/3001/3005/8091/3146/3399/3565/3575
GO:0043393	BP	GO:0043393	regulation of protein binding	110	0.384716	1.58851	0.00060006	0.00907071	0.0069945	1506	tags=33%, list=17%, signal=27%	151636/340061/650/3434/8829/7015/165904/1636/1522/2043/64388/28996/3433/4035/4133/22924/4233/4318/5155/10769/5792/6590/6653/7049/7448/408/409/9532/25805/627/8536/857/1601/27185/22943/151651
GO:0031406	MF	GO:0031406	carboxylic acid binding	82	0.403498	1.63475	0.000600841	0.00907071	0.0069945	2595	tags=46%, list=30%, signal=33%	1645/1646/6280/1719/8974/5091/6279/6472/6999/7298/445/338557/2348/143686/113235/55289/241/63827/652968/960/112399/2171/10841/27232/145864/3399/50939/286256/162417/7026/10536/23569/5730/65078/83667/114132/6573/6507
GO:0045931	BP	GO:0045931	positive regulation of mitotic cell cycle	77	0.414015	1.66979	0.000601443	0.00907071	0.0069945	2463	tags=47%, list=29%, signal=34%	1950/993/8318/990/7015/199/440/675/113130/1019/81620/51514/1978/3280/4085/27085/5155/5889/7480/9510/301/685/995/983/1543/6990/9700/26271/3306/3553/3741/134353/5159/5890/5902/28984
GO:0000077	BP	GO:0000077	DNA damage checkpoint	61	0.440791	1.74076	0.000602228	0.00907071	0.0069945	1496	tags=39%, list=17%, signal=33%	672/83990/63967/4436/4582/641/1017/51514/1869/146956/5111/10769/7027/54962/79968/84446/7832/8555/995/983/1026/1111/29980/79733
GO:1904029	BP	GO:1904029	regulation of cyclin-dependent protein kinase activity	53	0.452212	1.75923	0.000604047	0.00908588	0.00700619	1359	tags=40%, list=16%, signal=34%	9088/9134/993/990/641/1019/8851/1163/51191/3843/22924/5155/901/79616/81669/995/1026/1028/1032/1050/1164
GO:0019886	BP	GO:0019886	antigen processing and presentation of exogenous peptide antigen via MHC class II	45	0.479292	1.82493	0.000607472	0.00911289	0.00702703	1905	tags=47%, list=22%, signal=37%	2213/3109/3115/3119/3122/3127/3108/3117/3902/8905/972/1520/3113/3120/3123/56992/3835/26153/11004/24137/64837
GO:0032092	BP	GO:0032092	positive regulation of protein binding	45	0.480062	1.82787	0.000607472	0.00911289	0.00702703	1261	tags=38%, list=15%, signal=32%	151636/340061/650/8829/7015/1636/2043/28996/4035/22924/4318/10769/7448/408/25805/627/857
GO:0001892	BP	GO:0001892	embryonic placenta development	43	0.488215	1.84578	0.000609261	0.00912052	0.00703291	2348	tags=53%, list=27%, signal=39%	2034/133/639/677/1051/3280/3976/51294/5155/10733/9021/22846/655/3491/1028/1050/1437/79733/3726/3856/4188/7026/5333
GO:0048525	BP	GO:0048525	negative regulation of viral process	42	0.485884	1.83027	0.000609694	0.00912052	0.00703291	1282	tags=38%, list=15%, signal=33%	6348/8519/4940/2934/3434/91543/164668/24138/10410/3669/4599/4938/6590/140564/60489/6352
GO:0043648	BP	GO:0043648	dicarboxylic acid metabolic process	41	0.490717	1.84185	0.000610563	0.00912052	0.00703291	2595	tags=59%, list=30%, signal=41%	8528/1719/84706/6472/445/2348/2678/4200/10797/5625/113235/23657/160428/7915/2271/10841/79944/4199/4522/25902/162417/23475/6573/6507
GO:0009119	BP	GO:0009119	ribonucleoside metabolic process	39	0.489435	1.82727	0.000611683	0.00912052	0.00703291	1134	tags=38%, list=13%, signal=34%	272/56952/100/51816/164668/1503/4830/4833/9414/7378/191/205/51074/140564/60489
GO:0001730	MF	GO:0001730	2'-5'-oligoadenylate synthetase activity	3	0.911652	1.73586	0.000613685	0.00912052	0.00703291	765	tags=100%, list=9%, signal=91%	4940/4939/4938
GO:0036015	BP	GO:0036015	response to interleukin-3	3	0.915826	1.7438	0.000613685	0.00912052	0.00703291	729	tags=100%, list=8%, signal=92%	1439/3563/4502
GO:0036016	BP	GO:0036016	cellular response to interleukin-3	3	0.915826	1.7438	0.000613685	0.00912052	0.00703291	729	tags=100%, list=8%, signal=92%	1439/3563/4502
GO:0015914	BP	GO:0015914	phospholipid transport	30	0.53502	1.91987	0.000621633	0.00922638	0.00711454	712	tags=33%, list=8%, signal=31%	9619/19/5244/114884/23120/57205/10396/57198/1071/84879
GO:0042574	BP	GO:0042574	retinal metabolic process	7	0.775554	1.92288	0.000642261	0.00951992	0.00734089	123	tags=43%, list=1%, signal=42%	1545/1645/8644
GO:0000731	BP	GO:0000731	DNA synthesis involved in DNA repair	20	0.581577	1.90946	0.000649632	0.00960374	0.00740552	2493	tags=70%, list=29%, signal=50%	9768/5983/51514/5111/5422/10714/5982/5984/5985/1032/5424/5427/6118/6119
GO:0098586	BP	GO:0098586	cellular response to virus	20	0.593623	1.94901	0.000649632	0.00960374	0.00740552	1945	tags=60%, list=23%, signal=47%	55601/340061/2537/3665/79132/5600/10018/23586/64135/3592/345611/3965
GO:0001562	BP	GO:0001562	response to protozoan	17	0.62035	1.95761	0.000664452	0.00979694	0.00755451	1845	tags=65%, list=21%, signal=51%	958/115361/116071/2634/3566/6556/602/163351/3592/3593/3662
GO:0042832	BP	GO:0042832	defense response to protozoan	17	0.62035	1.95761	0.000664452	0.00979694	0.00755451	1845	tags=65%, list=21%, signal=51%	958/115361/116071/2634/3566/6556/602/163351/3592/3593/3662
GO:0035457	BP	GO:0035457	cellular response to interferon-alpha	6	0.817444	1.92451	0.000667646	0.00983109	0.00758083	620	tags=67%, list=7%, signal=62%	3437/558/2621/3433
GO:0001819	BP	GO:0001819	positive regulation of cytokine production	222	0.344468	1.46865	0.00069993	0.0101635	0.00783719	1845	tags=33%, list=21%, signal=27%	5142/6348/1545/9590/55601/11148/10855/340061/672/929/29126/958/1649/3115/3665/91543/7099/84632/199/718/728/923/1051/1436/79132/2149/57493/3082/3162/3566/4035/5600/4602/22861/10622/51728/338382/8482/6556/7057/7100/301/468/602/727/729230/10666/972/942/1054/23601/1437/1536/23586/8288/3113/3134/3146/57824/3329/64135/3459/3592/3593/23765/84818/8809/3553/9173/51561/3565/3574/3662
GO:0006508	BP	GO:0006508	proteolysis	634	0.297333	1.2982	0.00069993	0.0101635	0.00783719	3079	tags=43%, list=36%, signal=30%	871/3075/84168/151636/5627/79659/1950/26471/4983/6280/9806/10863/358/27113/672/726/837/1490/993/79094/63967/1649/1803/2534/2934/2537/4210/6279/5272/5270/6472/23145/2/1636/290/23621/25825/27018/51279/716/717/718/720/721/728/825/1017/5199/8532/1519/1522/51514/1942/2043/2161/2149/10875/2335/2621/2678/10755/2822/3082/28996/3429/4085/4320/4318/22861/4973/115209/29763/5046/10769/10213/5896/5649/255488/…
GO:0030667	CC	GO:0030667	secretory granule membrane	142	0.370928	1.55208	0.00069993	0.0101635	0.00783719	2609	tags=45%, list=30%, signal=32%	2212/6678/968/3690/340061/929/6402/290/10396/728/634/4680/4973/5175/51365/27180/6556/6518/374403/21/221/857/135228/57126/952/960/928/23601/8895/1536/79930/2171/2204/2357/2358/84443/84329/3382/3683/3708/8514/27074/10184/199675/8972/4311/64386/23114/5023/5099/9749/5329/5724/5788/5795/5799/25837/11031/326624/8153/5273/140885/10326/6515
GO:0032989	BP	GO:0032989	cellular component morphogenesis	520	0.30544	1.32911	0.00069993	0.0101635	0.00783719	2905	tags=40%, list=34%, signal=28%	6347/57175/55715/84168/6348/6678/604/1952/3690/3914/4606/4914/4983/388/58480/10602/1291/5168/2534/8516/8829/57580/57698/347733/10090/348110/558/825/999/8851/1436/1496/6387/1742/26052/1894/1942/1959/2043/221472/2258/2335/57493/3280/3082/3398/3679/8997/84623/59352/4035/4036/11178/4133/4233/58529/10529/5819/4897/84033/4974/5063/5175/23187/90102/5649/389/54538/6383/10500/8482/6446/6474/6696/80725/297…
GO:0050767	BP	GO:0050767	regulation of neurogenesis	370	0.320043	1.38316	0.00069993	0.0101635	0.00783719	2813	tags=41%, list=33%, signal=29%	6348/604/8553/1524/4914/6280/650/2534/3655/8829/57580/349667/5270/57698/7015/347733/10090/8851/1496/1522/6387/1742/54567/26052/1869/1894/1942/2043/2119/2258/2335/100132074/3280/55502/3082/3398/285313/81618/6453/8997/3956/3976/4035/4036/11178/4133/4602/4830/4897/4974/5063/10769/5792/5649/6383/10500/8482/6474/6653/6696/80725/55714/7422/7436/7516/7533/6935/577/389658/10677/53335/627/221336/80823/274…
GO:0055065	BP	GO:0055065	metal ion homeostasis	275	0.328921	1.41164	0.00069993	0.0101635	0.00783719	2828	tags=42%, list=33%, signal=29%	6348/793/1524/2034/6280/23428/133/84239/493/958/3627/1649/2534/2841/9290/5579/6279/11346/9429/478/728/773/784/825/6387/10800/1742/2149/9843/3162/3757/4035/4502/5026/5031/6556/1318/113235/6546/29887/8614/7052/55151/148/9472/288/187/468/491/554/56898/114897/794/857/6352/729230/952/10518/1193/1268/6373/79901/27185/1815/1907/151176/30001/2151/9002/2357/2358/8811/10539/2769/2852/2828/8477/2906/9001/30…
GO:0072507	BP	GO:0072507	divalent inorganic cation homeostasis	218	0.344525	1.46832	0.00069993	0.0101635	0.00783719	2828	tags=44%, list=33%, signal=30%	6348/793/1524/6280/133/84239/493/958/3627/1649/2534/2841/9290/5579/6279/11346/728/773/784/825/6387/10800/1742/2149/4035/4502/5026/5031/6556/6546/29887/8614/7052/55151/148/9472/288/187/468/491/114897/794/857/6352/729230/952/10518/1193/1268/6373/27185/1815/1907/30001/2151/9002/2357/2358/8811/2769/2852/2828/8477/2906/9001/3146/3270/3708/56704/3741/55013/4493/4828/10874/5021/5023/5024/5144/5314/8398/…
GO:0007160	BP	GO:0007160	cell-matrix adhesion	127	0.372692	1.55066	0.0007	0.0101635	0.00783719	3027	tags=50%, list=35%, signal=33%	2013/604/10855/3690/1490/342184/3655/8516/8829/94/84962/4680/1307/10391/4921/2335/3679/4035/5175/90102/6614/7057/7422/7448/87/11093/395/10018/960/1021/23332/23603/1435/2017/780/27185/1896/10516/10979/3672/3683/3691/3693/3695/182/4323/4763/22795/4814/255743/5795/5921/6385/10580/161497/7059/7070/7402/7412/7414/88/89/8754/56999
GO:0045862	BP	GO:0045862	positive regulation of proteolysis	154	0.361376	1.51881	0.0007	0.0101635	0.00783719	2376	tags=41%, list=28%, signal=30%	84168/1950/26471/6280/27113/837/1490/2534/2934/4210/6279/27018/718/825/1942/2043/2161/2149/2335/2822/22861/29763/10769/10213/255488/153769/8743/9966/408/9532/10018/838/857/3491/1050/8837/54982/1512/54205/1601/27185/112399/2152/2192/2264/2852/2896/3092/3146/3329/3336/3553/9992/3965/4241/4323/114548/5023/9141/5245/65018/5366/144165
GO:0061695	CC	GO:0061695	transferase complex, transferring phosphorus-containing groups	88	0.400788	1.62952	0.000700771	0.0101635	0.00783719	1359	tags=35%, list=16%, signal=30%	9134/23649/7015/94/1017/1019/8851/1163/1763/24138/4172/5111/5422/10714/10622/51728/5557/5558/9021/90/91/92/93/901/79616/10849/983/1021/1026/1032/1164
GO:0019724	BP	GO:0019724	B cell mediated immunity	84	0.407595	1.65393	0.000700841	0.0101635	0.00783719	1825	tags=38%, list=21%, signal=30%	604/2213/958/3119/3665/4436/51279/716/717/718/720/721/9156/10875/3543/3566/5819/710/28526/7374/79915/602/727/10666/970/972/1380/3329/3493/3494/3514/3565
GO:0000723	BP	GO:0000723	telomere maintenance	78	0.413562	1.67004	0.000701122	0.0101635	0.00783719	852	tags=28%, list=10%, signal=26%	9134/8365/23649/5888/5983/7015/641/675/64858/1763/9156/2237/5111/5422/10714/5557/5558/5889/9401/5982/5984/5985
GO:0008106	MF	GO:0008106	alcohol dehydrogenase (NADP+) activity	11	0.709615	2.00669	0.000705053	0.0102073	0.00787094	353	tags=45%, list=4%, signal=44%	1645/1646/8644/9249/1109
GO:0004984	MF	GO:0004984	olfactory receptor activity	12	-0.601609	-2.56285	0.000713267	0.0102955	0.00793897	2119	tags=92%, list=25%, signal=69%	26184/158131/346528/79541/341152/127623/284521/119692/119774/196335/130075
GO:0050911	BP	GO:0050911	detection of chemical stimulus involved in sensory perception of smell	12	-0.601609	-2.56285	0.000713267	0.0102955	0.00793897	2119	tags=92%, list=25%, signal=69%	26184/158131/346528/79541/341152/127623/284521/119692/119774/196335/130075
GO:0007200	BP	GO:0007200	phospholipase C-activating G protein-coupled receptor signaling pathway	37	0.492527	1.82369	0.000715673	0.0102955	0.00793897	1684	tags=46%, list=20%, signal=37%	1524/2841/9290/728/2149/4883/5031/7052/148/2151/9002/2357/2358/8811/2769/2828/8477
GO:0043486	BP	GO:0043486	histone exchange	37	0.497187	1.84095	0.000715673	0.0102955	0.00793897	2258	tags=57%, list=26%, signal=42%	8365/64946/55839/55166/79682/387103/54069/81611/1058/2491/64105/91687/79019/79172/201254/121504/8370/8366/23421/4678/11339
GO:1903901	BP	GO:1903901	negative regulation of viral life cycle	36	0.498107	1.84066	0.000715746	0.0102955	0.00793897	1282	tags=42%, list=15%, signal=36%	8519/4940/2934/3434/91543/164668/24138/10410/3669/4599/4938/6590/140564/60489/6352
GO:0032060	BP	GO:0032060	bleb assembly	4	0.874188	1.80474	0.000733783	0.0105279	0.00811816	9	tags=50%, list=0%, signal=50%	2012/2013
GO:0097617	MF	GO:0097617	annealing activity	4	0.870014	1.79612	0.000733783	0.0105279	0.00811816	1125	tags=100%, list=13%, signal=87%	8438/641/9401/301
GO:0002604	BP	GO:0002604	regulation of dendritic cell antigen processing and presentation	8	0.762231	1.96639	0.000753012	0.0107624	0.00829898	1306	tags=75%, list=15%, signal=64%	968/2213/10875/6556/7057/972
GO:0006268	BP	GO:0006268	DNA unwinding involved in DNA replication	8	0.756845	1.9525	0.000753012	0.0107624	0.00829898	2104	tags=100%, list=24%, signal=76%	4173/5888/641/4175/4176/9401/3159/4171
GO:0009263	BP	GO:0009263	deoxyribonucleotide biosynthetic process	8	0.745133	1.92228	0.000753012	0.0107624	0.00829898	1382	tags=75%, list=16%, signal=63%	6241/7298/1841/1854/6240/129607
GO:0000733	BP	GO:0000733	DNA strand renaturation	3	0.902029	1.71753	0.000767106	0.0109081	0.00841134	848	tags=100%, list=10%, signal=90%	8438/641/9401
GO:0004523	MF	GO:0004523	RNA-DNA hybrid ribonuclease activity	3	0.90087	1.71532	0.000767106	0.0109081	0.00841134	858	tags=100%, list=10%, signal=90%	9156/2237/10535
GO:0036310	MF	GO:0036310	annealing helicase activity	3	0.902029	1.71753	0.000767106	0.0109081	0.00841134	848	tags=100%, list=10%, signal=90%	8438/641/9401
GO:0043137	BP	GO:0043137	DNA replication, removal of RNA primer	3	0.90087	1.71532	0.000767106	0.0109081	0.00841134	858	tags=100%, list=10%, signal=90%	1763/2237/10535
GO:0006267	BP	GO:0006267	pre-replicative complex assembly involved in nuclear cell cycle DNA replication	7	0.768687	1.90586	0.000770713	0.0109178	0.00841879	706	tags=71%, list=8%, signal=66%	4173/4174/4172/4175/4176
GO:0036388	BP	GO:0036388	pre-replicative complex assembly	7	0.768687	1.90586	0.000770713	0.0109178	0.00841879	706	tags=71%, list=8%, signal=66%	4173/4174/4172/4175/4176
GO:1902299	BP	GO:1902299	pre-replicative complex assembly involved in cell cycle DNA replication	7	0.768687	1.90586	0.000770713	0.0109178	0.00841879	706	tags=71%, list=8%, signal=66%	4173/4174/4172/4175/4176
GO:0003924	MF	GO:0003924	GTPase activity	143	0.368009	1.54039	0.00079992	0.0111588	0.00860461	2850	tags=47%, list=33%, signal=32%	4600/23682/388/58480/7280/115361/2669/121268/6236/347733/51175/10123/26052/2634/166785/4599/4521/5872/338382/9628/389/22800/5414/203068/377/148252/54769/1917/163351/2769/2774/2791/55970/54331/2788/51184/345611/64284/55647/25837/11031/10981/326624/5901/5909/5921/23551/10633/5996/6004/5999/8787/171177/27289/8153/390/6237/151011/55964/7846/10376/84790/51807/79861/10381/10383/7283
GO:0006875	BP	GO:0006875	cellular metal ion homeostasis	246	0.335451	1.43461	0.00079992	0.0111588	0.00860461	2828	tags=43%, list=33%, signal=30%	6348/793/1524/6280/133/84239/493/958/3627/1649/2534/2841/9290/5579/6279/11346/9429/478/728/773/784/825/6387/10800/1742/2149/9843/3162/4035/4502/5026/5031/6556/1318/113235/6546/8614/7052/55151/148/9472/187/468/491/114897/794/857/6352/729230/952/10518/1193/1268/6373/79901/27185/1815/1907/151176/30001/2151/9002/2357/2358/8811/10539/2769/2852/2828/8477/2906/9001/3077/3146/3270/3708/56704/3741/55013/4…
GO:0006959	BP	GO:0006959	humoral immune response	135	0.369057	1.54068	0.00079992	0.0111588	0.00860461	1858	tags=33%, list=22%, signal=26%	6347/3075/5627/29760/2213/6280/3627/2920/3119/6279/54210/2/51279/716/717/718/720/721/728/5199/3576/9156/8349/3543/710/6441/6556/6590/28526/11326/7448/602/727/729230/1380/6373/1672/8347/3493/3494/3514/3553/3574/55600
GO:0007420	BP	GO:0007420	brain development	324	0.321786	1.38624	0.00079992	0.0111588	0.00860461	2712	tags=40%, list=31%, signal=28%	6414/347902/79659/1950/2213/4983/26227/358/493/650/54541/2113/2177/2534/8516/8829/349667/5270/10100/199/306/558/8704/597/675/728/999/8851/1436/1496/1500/6387/1869/1959/2057/79633/2258/59345/3280/8820/3398/3624/6453/84623/4035/4036/266727/84879/4830/8624/5649/6240/6344/8482/5414/23657/6546/7533/205/409/6310/554/63827/10018/655/659/7832/838/317762/928/1021/1141/1203/1272/26047/1638/27185/22943/8891…
GO:0012506	CC	GO:0012506	vesicle membrane	347	0.321535	1.38693	0.00079992	0.0111588	0.00860461	2735	tags=41%, list=32%, signal=29%	2212/26509/6678/968/1950/3690/23682/9467/340061/440279/929/2841/3115/3119/3122/3127/3801/6402/113146/290/306/23120/10396/23621/8927/728/634/4680/1742/8448/2348/10755/10457/1839/3117/3601/11015/4035/4036/4973/5175/51365/112476/5872/338382/27180/6556/6518/6272/374403/10791/81029/21/221/301/307/8905/408/554/685/8618/857/135228/9332/57126/50489/952/960/972/928/23601/8218/8895/1536/1601/1638/57540/233…
GO:0030336	BP	GO:0030336	negative regulation of cell migration	133	0.371498	1.54935	0.00079992	0.0111588	0.00860461	3070	tags=50%, list=36%, signal=33%	6347/57175/1545/8519/1524/1588/388/2841/94/100/199/348110/999/10370/6387/54567/3162/3486/3488/4035/90102/90627/55333/7057/22846/57406/727/29775/972/23332/23603/1809/1843/11221/2022/83481/10014/3146/3565/182/9314/3868/753/65009/4763/7026/3084/11240/138429/5734/5764/5795/28984/6237/56833/57522/6915/7070/7076/10221/7414/130399/56999/104/575/134/4301
GO:0030659	CC	GO:0030659	cytoplasmic vesicle membrane	342	0.321621	1.38693	0.00079992	0.0111588	0.00860461	2735	tags=41%, list=32%, signal=29%	2212/26509/6678/968/1950/3690/23682/9467/340061/440279/929/2841/3115/3119/3122/3127/3801/6402/113146/290/306/23120/10396/23621/8927/728/634/4680/1742/8448/2348/10457/1839/3117/3601/11015/4035/4036/4973/5175/51365/112476/5872/338382/27180/6556/6518/6272/374403/10791/81029/21/221/301/8905/408/554/685/8618/857/135228/9332/57126/50489/952/960/972/928/23601/8218/8895/1536/1601/1638/57540/23312/79930/2…
GO:0031589	BP	GO:0031589	cell-substrate adhesion	195	0.353249	1.49834	0.00079992	0.0111588	0.00860461	2878	tags=45%, list=33%, signal=30%	2013/84168/604/10855/3690/3914/9806/1490/342184/3678/3655/8516/8829/57580/94/84962/246/558/4680/1307/1277/10391/4921/1942/2335/2621/3679/3956/4035/5175/90102/6614/80725/7057/7422/7448/87/11093/395/10018/3491/960/1021/23332/23603/1435/2017/780/27185/1896/2192/10516/10979/3672/3683/3691/3693/3695/182/3913/3918/4241/4323/64005/79625/4739/4763/22795/4814/255743/59277/55742/5764/5795/5921/6385/4091/10…
GO:0044440	CC	GO:0044440	endosomal part	172	0.358289	1.51232	0.00079992	0.0111588	0.00860461	2802	tags=44%, list=32%, signal=30%	84168/151636/968/4914/388/929/29126/3109/3115/3119/3122/3127/3665/4360/7099/9744/23621/8938/2043/221472/10457/3108/3117/10410/4036/6490/5551/84440/5872/338382/6556/285195/29887/6653/6272/284417/23555/57406/118429/301/857/911/50489/23603/1512/1513/1520/22943/3113/3120/3123/3134/3592/3593/57535/63971/27074/3949/753/9476/4689/10397/5662/64284/11031/387849/171177/7781/90203/8877/7037/7098/51284/10040…
GO:0099177	BP	GO:0099177	regulation of trans-synaptic signaling	221	0.343582	1.4647	0.00079992	0.0111588	0.00860461	2644	tags=43%, list=31%, signal=30%	6347/9590/793/1524/4914/4983/440279/2534/5579/5270/11346/347733/23621/8938/760/773/784/999/1742/1959/2043/2149/10755/2894/11178/10769/112476/5649/6344/23657/7533/57406/148/409/627/84446/794/729230/952/8973/1141/9746/1268/1395/23191/27185/22943/1815/1949/2171/2852/392862/2897/2899/2900/2901/2906/2912/2918/9001/152404/3553/23096/3745/27345/4130/4311/9148/4763/54413/10874/4900/5021/5023/5024/27253/6…
GO:0005096	MF	GO:0005096	GTPase activator activity	114	0.377132	1.56021	0.00080008	0.0111588	0.00860461	3264	tags=59%, list=38%, signal=37%	54453/57514/4983/259173/8829/57580/25780/117289/23158/9744/79658/58504/83478/1894/9628/90627/374403/9882/55803/577/141/84986/395/64333/408/55616/9732/10144/4763/5364/5902/5909/23108/5921/22821/5996/6004/5999/8787/26037/57568/57522/134957/84218/7070/11033/116987/116986/3268/216/116984/64411/94134/55843/93663/57569/79822/257106/9743/393/143872/397/398/55160/9826/9459/8853
GO:0042180	BP	GO:0042180	cellular ketone metabolic process	92	0.39512	1.61243	0.000800641	0.0111588	0.00860461	2392	tags=43%, list=28%, signal=32%	1645/1646/1588/133/8644/493/650/672/6999/1109/634/1583/3638/1728/10062/5166/23590/10213/23657/9056/225/301/857/972/1268/27235/51805/84649/151176/10613/2171/2264/2819/3553/51085/8013/51686/5019/5629/5702
GO:0008360	BP	GO:0008360	regulation of cell shape	76	0.414998	1.67122	0.000801684	0.0111588	0.00860461	2542	tags=47%, list=29%, signal=34%	6347/6348/388/58480/10602/2534/1436/221472/2335/3679/389/7422/301/25805/11135/148170/1690/23191/23136/221061/54751/10979/121512/3383/55742/51177/91584/5364/5764/5921/171177/27289/8153/390/6284/64218
GO:1990845	BP	GO:1990845	adaptive thermogenesis	69	0.426012	1.7016	0.000801684	0.0111588	0.00860461	2350	tags=48%, list=27%, signal=35%	2034/1649/7099/1051/338557/50486/3566/4883/10062/115209/6319/6344/6653/7422/7480/57406/93/468/857/729230/2171/2271/2827/2887/8809/3565/3662/23135/5021/56034/51316/5334/23228
GO:0045621	BP	GO:0045621	positive regulation of lymphocyte differentiation	54	0.446512	1.74073	0.000805153	0.0111931	0.00863111	2910	tags=59%, list=34%, signal=40%	604/64332/3559/100/558/1960/2621/3566/4602/5896/301/972/942/11221/2737/3142/3592/3593/51561/3565/3574/3575/3965/4323/114548/5788/8651/9840/8744/9760/64115/7535
GO:0050766	BP	GO:0050766	positive regulation of phagocytosis	44	0.470781	1.78476	0.000811524	0.0112677	0.00868861	2813	tags=59%, list=33%, signal=40%	6347/2213/717/718/720/721/2621/3601/3560/4035/6441/6556/2358/3553/3561/55646/5788/5795/5806/11031/653509/729238/140885/10326/7124/54209
GO:0008373	MF	GO:0008373	sialyltransferase activity	14	-0.650859	-2.98374	0.000819672	0.0113386	0.00874331	867	tags=86%, list=10%, signal=77%	6482/6483/6484/8869/10402/6480/84620/256435/81849/30815/6489/7903
GO:0030627	MF	GO:0030627	pre-mRNA 5'-splice site binding	14	-0.699845	-3.20831	0.000819672	0.0113386	0.00874331	1451	tags=93%, list=17%, signal=77%	26871/26870/26869/6060/26824/100151683/101954273/101954266/101954267/26863/26864/6631/285962
GO:0097503	BP	GO:0097503	sialylation	14	-0.650859	-2.98374	0.000819672	0.0113386	0.00874331	867	tags=86%, list=10%, signal=77%	6482/6483/6484/8869/10402/6480/84620/256435/81849/30815/6489/7903
GO:0016803	MF	GO:0016803	ether hydrolase activity	5	0.841648	1.87183	0.00083045	0.0114594	0.00883643	354	tags=60%, list=4%, signal=58%	2052/144110/246
GO:0035425	BP	GO:0035425	autocrine signaling	5	0.841833	1.87224	0.00083045	0.0114594	0.00883643	289	tags=60%, list=3%, signal=58%	968/1524/6279
GO:0036499	BP	GO:0036499	PERK-mediated unfolded protein response	10	0.712364	1.96153	0.00083722	0.0115244	0.00888656	1159	tags=60%, list=13%, signal=52%	6347/1649/440/3576/23645/468
GO:0099563	BP	GO:0099563	modification of synaptic structure	10	0.709997	1.95501	0.00083722	0.0115244	0.00888656	1429	tags=70%, list=17%, signal=58%	11346/1496/58512/2043/6453/8936/23191
GO:0090240	BP	GO:0090240	positive regulation of histone H4 acetylation	4	0.864796	1.78535	0.00088054	0.0121058	0.00933489	1170	tags=100%, list=14%, signal=86%	672/4582/408/26053
GO:0009262	BP	GO:0009262	deoxyribonucleotide metabolic process	17	0.615669	1.94284	0.000885936	0.012165	0.00938056	1382	tags=59%, list=16%, signal=49%	6241/7298/100/79077/1841/1854/4521/6240/7374/129607
GO:0016301	MF	GO:0016301	kinase activity	293	0.325535	1.39852	0.00089991	0.0121928	0.00940196	2382	tags=37%, list=28%, signal=28%	6347/6348/5157/80216/4914/9088/388228/9134/4261/23604/2534/8829/5579/83694/94/558/699/5129/1017/1019/8851/548596/1159/1436/4921/1841/2043/2065/2261/28996/8997/5600/84930/9833/4233/4830/4833/54981/84033/5063/5166/91461/10769/10733/6446/10110/7049/9414/7083/7273/7443/9625/90/91/92/93/205/57538/659/84446/8536/6352/901/79616/55561/983/1021/1026/1111/57396/129607/8895/1633/780/1606/2202/1949/1969/1059…
GO:0033043	BP	GO:0033043	regulation of organelle organization	492	0.303488	1.31885	0.00089991	0.0121928	0.00940196	2826	tags=40%, list=33%, signal=28%	57175/604/1950/26471/9088/388/58480/6280/27113/672/1490/10602/8318/990/342184/6624/2934/4582/8829/57580/6279/285590/11346/246/348110/29028/90427/699/168448/113130/8851/81620/100653515/10391/23406/1436/1496/6387/1869/1894/2237/2258/9535/3082/3638/3976/4035/4085/4133/22924/4233/4318/27085/4602/4853/115209/5063/5154/5155/23187/90102/130271/10769/10733/25886/112476/389/116028/220134/54908/6773/50861/…
GO:0034762	BP	GO:0034762	regulation of transmembrane transport	262	0.331595	1.42083	0.00089991	0.0121928	0.00940196	2819	tags=42%, list=33%, signal=29%	6347/3790/5142/55917/6329/140738/493/3627/2534/2669/5579/6236/55800/6330/6335/7015/306/718/760/773/55799/784/785/825/1180/1393/1742/2149/338557/3757/9132/56479/54800/4318/81831/5031/5649/1318/6546/7057/55151/7533/9472/288/338440/187/113451/274/93589/857/729230/1193/8218/1520/6373/1536/1815/9002/2171/5348/8811/2702/2852/2887/9001/3099/3270/3306/84329/3553/55600/56704/3738/3741/8514/3745/3750/3752/…
GO:0045785	BP	GO:0045785	positive regulation of cell adhesion	223	0.344429	1.46856	0.00089991	0.0121928	0.00940196	2916	tags=44%, list=34%, signal=30%	6347/2013/604/11148/64332/9806/29126/1803/2113/342184/2534/3109/3115/3559/3678/3655/8829/57580/100/199/246/923/4680/10370/1307/6387/1960/2335/3280/3566/3956/4602/5063/5896/7052/7422/7448/288/301/655/857/6352/3491/729230/30835/960/970/972/942/1021/1435/27185/11221/1949/10272/2737/3113/3142/3146/3329/3383/3485/3592/3593/3553/51561/3565/3574/3575/3718/3965/4284/79625/4739/10725/4814/114548/255743/80…
GO:0050804	BP	GO:0050804	modulation of chemical synaptic transmission	220	0.341585	1.456	0.00089991	0.0121928	0.00940196	2644	tags=42%, list=31%, signal=30%	6347/9590/793/1524/4914/4983/440279/2534/5579/5270/11346/347733/23621/8938/760/773/784/999/1742/1959/2043/2149/10755/2894/11178/10769/112476/5649/6344/23657/7533/57406/148/409/627/84446/794/729230/952/8973/1141/9746/1268/1395/23191/27185/22943/1815/1949/2852/392862/2897/2899/2900/2901/2906/2912/2918/9001/152404/3553/23096/3745/27345/4130/4311/9148/4763/54413/10874/4900/5021/5023/5024/27253/65018/…
GO:0060322	BP	GO:0060322	head development	346	0.317357	1.36885	0.00089991	0.0121928	0.00940196	2712	tags=40%, list=31%, signal=28%	6414/347902/79659/1950/2213/4983/26227/358/493/650/54541/2113/2177/2534/8516/8829/349667/5270/10100/199/306/558/8704/597/675/728/999/8851/1277/1436/1496/1500/6387/1869/1959/2057/79633/2258/59345/3280/8820/3398/3624/6453/84623/4035/4036/266727/84879/4830/8624/5649/6240/6344/8482/5414/23657/6546/7533/205/409/6310/554/63827/10018/655/659/7832/838/317762/928/1021/1141/1203/1272/26047/83716/64651/1638…
GO:0000086	BP	GO:0000086	G2/M transition of mitotic cell cycle	114	0.376411	1.55723	0.00090009	0.0121928	0.00940196	1778	tags=37%, list=21%, signal=30%	9088/672/993/990/63967/4998/22822/84962/641/1017/1019/51514/84930/9833/10733/10213/5889/90381/203068/7480/79866/84446/995/983/1026/55835/22995/79959/9793/23332/11064/29980/26271/2305/29933/115106/55142/54801/55559/93323/8091/3306
GO:0032944	BP	GO:0032944	regulation of mononuclear cell proliferation	111	0.379074	1.5657	0.00090009	0.0121928	0.00940196	2910	tags=50%, list=34%, signal=33%	604/2213/11148/29126/958/3109/3115/3559/7099/100/199/923/1051/10457/3280/8654/6441/11326/301/384/79915/6352/729230/30835/952/970/972/942/1026/1141/1435/3113/3146/3485/3592/3593/3553/51561/3565/3567/3574/3718/3965/5074/5621/5788/6385/7037/27242/7293/944/8744/7412/64115/7535
GO:0034404	BP	GO:0034404	nucleobase-containing small molecule biosynthetic process	98	0.387043	1.5852	0.00090054	0.0121928	0.00940196	2378	tags=42%, list=28%, signal=31%	5142/272/26471/56952/54541/11332/100/51816/554235/1503/79077/1841/1854/5169/2203/55706/4830/4833/4521/79023/8654/7083/7374/7378/230/1633/387712/2819/3099/80201/51085/4907/4913/5141/5143/5144/8622/5210/5224/5236/53632
GO:1901215	BP	GO:1901215	negative regulation of neuron death	86	0.399735	1.62302	0.000901172	0.0121928	0.00940196	1211	tags=30%, list=14%, signal=26%	6347/1524/4914/2534/4436/8829/7015/558/728/1051/2065/2149/10457/28996/3162/6453/4035/23657/6653/7516/408/409/468/627/80823/7832
GO:1903046	BP	GO:1903046	meiotic cell cycle process	86	0.402275	1.63333	0.000901172	0.0121928	0.00940196	2850	tags=51%, list=33%, signal=35%	83990/9134/993/2177/23397/5888/8438/675/699/146956/3976/84930/84057/55706/29893/5889/10592/400629/7153/995/201254/1164/11144/9700/2175/57697/286151/26271/63979/2827/3306/2956/4603/23310/83540/5810/5890/25788/9985/151246/10734/56155/9319/7283
GO:0000395	BP	GO:0000395	mRNA 5'-splice site recognition	15	-0.708275	-3.37422	0.000901713	0.0121928	0.00940196	1451	tags=93%, list=17%, signal=78%	26871/26870/26869/6060/26824/100151683/101954273/101954266/101954267/26863/26864/6631/135295/285962
GO:0005031	MF	GO:0005031	tumor necrosis factor-activated receptor activity	7	-0.687362	-2.20077	0.00090212	0.0121928	0.00940196	547	tags=86%, list=6%, signal=80%	8792/8764/8784/7132/7133/8718
GO:0004714	MF	GO:0004714	transmembrane receptor protein tyrosine kinase activity	37	0.48594	1.7993	0.000920151	0.0124215	0.00957831	2490	tags=57%, list=29%, signal=41%	5157/4914/8829/558/1436/4921/2043/2065/2261/4233/780/2202/1949/1969/2264/2322/3645/4486/8828/5159/4920
GO:0001755	BP	GO:0001755	neural crest cell migration	29	0.527673	1.88116	0.000934871	0.0125898	0.00970811	2545	tags=66%, list=29%, signal=46%	4254/8829/2335/2348/10500/8482/90/655/23603/8828/7869/10512/223117/6405/56920/64218/57715/9037/10501
GO:0036297	BP	GO:0036297	interstrand cross-link repair	29	0.528843	1.88533	0.000934871	0.0125898	0.00970811	2493	tags=62%, list=29%, signal=44%	84515/2187/2177/5888/64858/146956/55215/29089/201254/64789/2175/2178/2189/57697/2956/10635/6118/6119
GO:0009066	BP	GO:0009066	aspartate family amino acid metabolic process	25	0.549063	1.89789	0.000947668	0.0127468	0.00982917	1661	tags=48%, list=19%, signal=39%	501/26227/51268/10157/8528/440/445/6611/191/51074/23464/27232
GO:0042398	BP	GO:0042398	cellular modified amino acid biosynthetic process	24	0.554851	1.89788	0.000954401	0.012822	0.00988713	2157	tags=58%, list=25%, signal=44%	501/79094/1719/494143/548596/1159/79017/2678/23657/57571/2679/2686/4522/25902
GO:0009211	BP	GO:0009211	pyrimidine deoxyribonucleoside triphosphate metabolic process	5	0.840311	1.86885	0.000968858	0.0130006	0.0100249	1382	tags=100%, list=16%, signal=84%	7298/79077/1841/1854/129607
GO:0006873	BP	GO:0006873	cellular ion homeostasis	281	0.327813	1.40709	0.0009999	0.0133228	0.0102733	2828	tags=42%, list=33%, signal=29%	6348/793/1524/23682/6280/133/84239/493/958/3627/1649/2534/2841/9290/5579/6279/11346/9429/478/728/760/773/784/825/6387/10800/1742/2149/9843/3162/4035/4502/5026/5031/6556/1318/113235/83697/6546/285195/8614/7052/55151/148/9472/187/468/491/245973/534/114897/794/857/6352/729230/952/10518/1193/1203/54982/1268/6373/79901/27185/23312/1815/1907/151176/30001/2151/9002/2357/2358/8811/10539/2769/2852/2828/84…
GO:0016049	BP	GO:0016049	cell growth	196	0.347943	1.47584	0.0009999	0.0133228	0.0102733	2896	tags=46%, list=34%, signal=31%	604/6280/55840/3872/8829/6279/5270/57698/8470/94/9564/8851/634/6387/2203/2258/2335/1839/3486/3487/3488/3490/3624/4035/4133/4897/10235/10500/8482/6446/10110/6696/54879/7422/8936/91/148/9472/26053/53335/627/659/694/952/54825/1026/1032/9746/2017/23191/780/27185/23136/23404/10516/23769/26153/3913/4323/10276/54413/8828/5058/10038/5245/91584/8643/5795/5999/8153/65078/7869/10512/223117/6405/56920/64218/…
GO:0017144	BP	GO:0017144	drug metabolic process	352	0.318281	1.37359	0.0009999	0.0133228	0.0102733	3134	tags=47%, list=36%, signal=31%	1545/259307/1645/1646/272/1524/92126/26471/26227/51268/29968/10157/133/8644/493/650/54541/1719/2534/4436/5091/6472/7099/7298/10090/100/51816/199/1109/440/445/548596/1159/1491/1583/5169/2203/2348/2653/2678/3043/4200/166785/10797/55706/1728/79023/5106/113235/6611/6697/6948/84532/55902/191/205/160428/217/221/7915/230/51074/384/516/63827/56898/57571/857/102724560/983/1141/1512/1536/54205/1543/1548/15…
GO:0044430	CC	GO:0044430	cytoskeletal part	704	0.29346	1.28344	0.0009999	0.0133228	0.0102733	2908	tags=40%, list=34%, signal=29%	57175/5142/23336/793/79659/4606/55930/9768/58480/7280/56271/672/9134/8318/990/57530/342184/6624/2534/2669/2934/23046/3801/3872/4210/8829/57326/5888/285590/57698/11346/347733/51175/165904/81569/199/84962/79000/90427/675/168448/999/1017/79682/145508/100653515/1107/150468/7461/23406/1393/64858/26052/51514/199221/1869/1894/2037/2258/9535/347240/338785/144501/3887/3892/4085/4133/9053/22924/84930/4172/…
GO:0051188	BP	GO:0051188	cofactor biosynthetic process	127	0.370552	1.54176	0.001	0.0133228	0.0102733	2415	tags=42%, list=28%, signal=31%	83666/26471/29968/79094/54541/1719/2534/4837/11332/554235/494143/2203/79017/2678/3145/166785/55706/54981/79023/5166/23590/6319/23657/6697/31/23305/84532/55902/230/56898/27235/51805/1536/1543/1737/50506/387712/2679/2686/2819/3099/80201/7923/51085/4522/25902/23057/5210/5224/5236/53632/5740/23475
GO:1901568	BP	GO:1901568	fatty acid derivative metabolic process	88	0.398448	1.62	0.0010011	0.0133228	0.0102733	2406	tags=45%, list=28%, signal=33%	1545/1646/8605/8644/11343/5742/11332/1109/246/4051/2678/6319/31/23305/240/241/301/56898/972/1543/1548/1565/29785/747/221955/84649/1907/2171/2679/2686/3248/7923/3553/5019/5445/10394/5730/9536/5740/22949
GO:0001659	BP	GO:0001659	temperature homeostasis	80	0.404868	1.63836	0.0010012	0.0133228	0.0102733	3109	tags=60%, list=36%, signal=39%	2034/1649/7099/1051/338557/50486/3566/4883/10062/115209/6319/7422/7480/57406/93/8862/468/857/729230/1268/1907/2171/2271/2827/2887/8809/3553/3565/3662/23135/10874/5021/56034/51316/5334/23228/7124/7253/18/33/43/55856/2180/89/11096/134/154/216
GO:0009148	BP	GO:0009148	pyrimidine nucleoside triphosphate biosynthetic process	8	0.740371	1.91	0.00100402	0.0133444	0.0102899	1382	tags=75%, list=16%, signal=63%	7298/1503/1841/4830/4833/129607
GO:0031572	BP	GO:0031572	G2 DNA damage checkpoint	15	0.635993	1.94701	0.00101203	0.0134349	0.0103598	1756	tags=67%, list=20%, signal=53%	672/63967/641/51514/84446/8555/983/1111/29980/8091
GO:0048029	MF	GO:0048029	monosaccharide binding	33	0.511395	1.86457	0.0010269	0.0135892	0.0104788	2609	tags=64%, list=30%, signal=45%	80216/4360/8974/2203/6441/6518/50489/30835/50856/10332/1203/112399/2022/3099/80201/3965/10536/22934/653509/729238/6515
GO:0034316	BP	GO:0034316	negative regulation of Arp2/3 complex-mediated actin nucleation	4	0.861781	1.77912	0.0010273	0.0135892	0.0104788	579	tags=75%, list=7%, signal=70%	57175/1496/9535
GO:0047115	MF	GO:0047115	trans-1,2-dihydrobenzene-1,2-diol dehydrogenase activity	4	0.861085	1.77769	0.0010273	0.0135892	0.0104788	123	tags=75%, list=1%, signal=74%	1645/1646/8644
GO:0048179	CC	GO:0048179	activin receptor complex	6	0.793609	1.8684	0.00106823	0.014114	0.0108835	1066	tags=83%, list=12%, signal=73%	94/90/91/92/93
GO:0045005	BP	GO:0045005	DNA-dependent DNA replication maintenance of fidelity	21	0.56578	1.87953	0.00107724	0.0142162	0.0109623	2797	tags=76%, list=32%, signal=52%	5888/641/675/1763/146956/5111/54962/10189/201254/29980/57697/253714/5424/25939/8914/4796
GO:0009790	BP	GO:0009790	embryo development	425	0.305883	1.32597	0.00109989	0.014384	0.0110916	2540	tags=37%, list=29%, signal=28%	79659/2034/3690/3914/26227/133/55723/650/672/1291/9837/3678/8516/4254/23764/4436/8829/7703/639/347733/677/94/100/10566/675/8851/1051/79682/10370/1277/3576/54567/1942/2335/2348/84296/64388/57493/3280/8820/28996/3398/3624/3638/3679/9132/3976/4036/4318/54892/2494/51294/5046/5154/5155/23187/90102/91461/10733/10848/9644/6474/201895/9021/10253/50861/7041/7153/22846/7422/7448/7516/6935/90/91/92/93/60529…
GO:0043269	BP	GO:0043269	regulation of ion transport	317	0.319968	1.37765	0.00109989	0.014384	0.0110916	1887	tags=31%, list=22%, signal=25%	6347/3790/5142/6348/1950/3690/6329/140738/5244/493/3627/2534/2564/2669/6236/55800/6330/6335/5270/306/10396/760/773/55799/784/785/825/1051/1180/1393/6387/1742/2149/3757/9132/56479/54800/4318/81831/5026/5031/29763/5155/5649/1318/6546/8614/7057/55151/7533/9472/288/338440/187/409/468/274/93589/857/6352/729230/8973/1141/1193/1268/1272/283229/1520/6373/1536/1815/151651/151176/9002/5348/8811/2702/2852/9…
GO:1901681	MF	GO:1901681	sulfur compound binding	130	0.366501	1.52677	0.00109989	0.014384	0.0110916	3196	tags=55%, list=37%, signal=35%	3075/1490/3627/89797/8829/5091/6402/5270/11332/51816/30817/51363/2335/10468/10457/64388/1839/59352/4035/5046/5792/7049/7057/7422/7448/9510/3730/307/655/3491/1289/83716/6373/1809/2200/2246/2264/27232/60495/50939/3918/200879/344967/56925/79625/8828/9141/3276/9536/5764/5788/1104/65078/9037/7059/7060/25890/33/79777/134526/170689/9508/11096/11095/339366/375790/4329/283/27329/26/333
GO:0051480	BP	GO:0051480	regulation of cytosolic calcium ion concentration	162	0.35642	1.50098	0.0011	0.014384	0.0110916	2438	tags=42%, list=28%, signal=31%	6348/793/1524/133/493/3627/1649/2534/2841/9290/11346/728/773/784/825/10800/1742/2149/4035/5026/5031/6546/7052/55151/148/9472/187/491/114897/794/857/729230/952/10518/1193/1268/6373/1907/30001/2151/9002/2357/2358/8811/2769/2852/2828/8477/2906/9001/3146/3270/3708/56704/3741/4828/10874/5021/5023/5024/5144/8398/5621/5732/5734/5739/5788/22821
GO:0051924	BP	GO:0051924	regulation of calcium ion transport	114	0.374296	1.54848	0.00110011	0.014384	0.0110916	2467	tags=42%, list=29%, signal=30%	6347/5142/6348/1950/3627/2534/2669/6236/784/785/825/6387/2149/5026/5031/29763/5155/6546/8614/55151/9472/187/409/274/857/6352/1193/283229/6373/1815/151651/9002/2852/9001/9455/3270/3306/3383/56704/9992/5023/5024/5144/5159/8398/5621/5999/8787
GO:0010977	BP	GO:0010977	negative regulation of neuron projection development	79	0.403364	1.63112	0.0011011	0.014384	0.0110916	2742	tags=51%, list=32%, signal=35%	8829/349667/8851/1522/26052/1942/2043/2258/81618/3956/4035/4133/4974/10769/10500/8482/6696/7533/53335/952/23258/22943/1809/1949/2288/83999/54413/23108/65078/7869/10512/223117/6405/56920/64218/57715/9037/10501/112755/7070
GO:0050777	BP	GO:0050777	negative regulation of immune response	79	0.401523	1.62368	0.0011011	0.014384	0.0110916	2222	tags=44%, list=26%, signal=33%	604/2213/3559/54625/5272/2/246/634/79132/5169/10875/3162/3566/9111/10062/710/11326/301/384/409/729230/11221/2896/3077/3134/3142/3593/9173/3575/11213/3718/3965/100507436/84166/171389
GO:2001236	BP	GO:2001236	regulation of extrinsic apoptotic signaling pathway	70	0.417811	1.66969	0.00110254	0.014384	0.0110916	1827	tags=41%, list=21%, signal=33%	672/2534/2537/3655/8829/7015/50486/3082/3162/3624/81618/4055/8406/7057/7078/8743/7185/90/367/857/8837/1437/2017/64798/55179/2852/3383/3553/3574
GO:0003158	BP	GO:0003158	endothelium development	68	0.424173	1.69287	0.00110287	0.014384	0.0110916	2791	tags=54%, list=32%, signal=37%	388/3627/8829/94/634/54567/57493/4233/5175/90627/9414/7422/6935/90/93/26084/84913/659/694/2022/2246/27086/2702/3383/3553/182/23135/153562/7026/3084/5144/5629/5764/10411/54345/7124/64102
GO:0010595	BP	GO:0010595	positive regulation of endothelial cell migration	62	0.431308	1.70558	0.00110409	0.014384	0.0110916	2381	tags=47%, list=28%, signal=34%	6678/3690/388/958/2113/8829/154810/306/9564/2822/3162/4233/5155/10769/7057/7422/301/84913/659/2246/8817/27086/2896/3146/57608/5606/8828/8613/5629
GO:0033559	BP	GO:0033559	unsaturated fatty acid metabolic process	62	0.434046	1.71641	0.00110409	0.014384	0.0110916	2529	tags=50%, list=29%, signal=36%	1545/1646/8605/8644/11343/5742/1109/246/4051/6319/225/240/241/301/972/1543/1548/1565/29785/747/221955/1907/2171/9415/3248/3553/5730/9536/5740/22949/79966
GO:0047429	MF	GO:0047429	nucleoside-triphosphate diphosphatase activity	5	0.835288	1.85769	0.00110727	0.0144086	0.0111106	761	tags=80%, list=9%, signal=73%	79077/1854/5169/4521
GO:1902807	BP	GO:1902807	negative regulation of cell cycle G1/S phase transition	50	0.453237	1.74892	0.00111055	0.0144346	0.0111306	1541	tags=42%, list=18%, signal=35%	6347/4582/5933/1017/1019/1869/10457/5111/10769/7027/7832/387695/995/983/1021/1026/1032/10106/10217/79733/2146
GO:0002495	BP	GO:0002495	antigen processing and presentation of peptide antigen via MHC class II	46	0.462824	1.76827	0.00111313	0.0144514	0.0111436	1905	tags=46%, list=22%, signal=36%	2213/3109/3115/3119/3122/3127/3108/3117/3902/8905/972/1520/3113/3120/3123/56992/3835/26153/11004/24137/64837
GO:0048708	BP	GO:0048708	astrocyte differentiation	42	0.472904	1.78138	0.00111777	0.0144948	0.011177	2813	tags=60%, list=33%, signal=40%	650/6279/5270/7099/10100/25825/728/2043/3280/3398/3976/4035/274/1021/2358/2896/3459/3553/3913/3949/4763/4919/4920/7124/54209
GO:0006221	BP	GO:0006221	pyrimidine nucleotide biosynthetic process	15	0.630914	1.93146	0.00112448	0.0145627	0.0112294	1669	tags=67%, list=19%, signal=54%	7298/1503/1841/1854/4830/4833/7378/56895/129607/84803
GO:0034080	BP	GO:0034080	CENP-A containing nucleosome assembly	34	0.513779	1.87973	0.00112832	0.0145627	0.0112294	2258	tags=59%, list=26%, signal=44%	8365/64946/55839/55166/79682/387103/54069/1058/2491/64105/91687/79019/79172/201254/121504/8370/8366/23421/4678/11339
GO:0061641	BP	GO:0061641	CENP-A containing chromatin organization	34	0.513779	1.87973	0.00112832	0.0145627	0.0112294	2258	tags=59%, list=26%, signal=44%	8365/64946/55839/55166/79682/387103/54069/1058/2491/64105/91687/79019/79172/201254/121504/8370/8366/23421/4678/11339
GO:0097306	BP	GO:0097306	cellular response to alcohol	34	0.512241	1.8741	0.00112832	0.0145627	0.0112294	1909	tags=50%, list=22%, signal=39%	19/1646/8644/672/5888/641/999/1019/2822/3624/5031/31/1536/54331/3157/9314/687
GO:0004198	MF	GO:0004198	calcium-dependent cysteine-type endopeptidase activity	8	0.737921	1.90368	0.00112952	0.0145627	0.0112294	1251	tags=75%, list=14%, signal=64%	726/825/79747/147968/824/827
GO:0002548	BP	GO:0002548	monocyte chemotaxis	31	0.511541	1.84582	0.00113672	0.0146387	0.011288	1757	tags=45%, list=20%, signal=36%	6347/6348/414062/3627/199/6387/5155/301/6367/6352/729230/1843/2358/3146
GO:0044818	BP	GO:0044818	mitotic G2/M transition checkpoint	14	0.65445	1.96965	0.00113856	0.0146429	0.0112912	1756	tags=71%, list=20%, signal=57%	672/990/63967/4998/641/90381/84446/983/29980/8091
GO:0030301	BP	GO:0030301	cholesterol transport	30	0.515908	1.85129	0.00113966	0.0146429	0.0112912	1261	tags=37%, list=15%, signal=31%	9619/19/1645/1950/5244/1071/4035/10062/158219/26154/857
GO:0006978	BP	GO:0006978	DNA damage response, signal transduction by p53 class mediator resulting in transcription of p21 class mediator	7	0.762703	1.89102	0.00115607	0.0148027	0.0114145	1598	tags=86%, list=19%, signal=70%	672/4582/675/28996/1026/2305
GO:0008483	MF	GO:0008483	transaminase activity	7	0.76594	1.89905	0.00115607	0.0148027	0.0114145	585	tags=57%, list=7%, signal=53%	29968/84706/586/2875
GO:0016769	MF	GO:0016769	transferase activity, transferring nitrogenous groups	7	0.76594	1.89905	0.00115607	0.0148027	0.0114145	585	tags=57%, list=7%, signal=53%	29968/84706/586/2875
GO:0048841	BP	GO:0048841	regulation of axon extension involved in axon guidance	23	0.550546	1.86759	0.00117059	0.0149715	0.0115446	2545	tags=70%, list=29%, signal=49%	8829/6387/10500/8482/7422/659/91584/7869/10512/223117/6405/56920/64218/57715/9037/10501
GO:0050966	BP	GO:0050966	detection of mechanical stimulus involved in sensory perception of pain	11	0.694064	1.96272	0.00117509	0.0150119	0.0115758	487	tags=45%, list=6%, signal=43%	4914/2534/23621/784/6387
GO:0030501	BP	GO:0030501	positive regulation of bone mineralization	21	0.562226	1.86772	0.00118496	0.015115	0.0116553	1573	tags=57%, list=18%, signal=47%	650/91461/6546/7480/90/92/93/84059/655/659/3491/2201
GO:0044613	CC	GO:0044613	nuclear pore central transport channel	6	-0.749594	-2.23319	0.00119379	0.015115	0.0116553	2166	tags=100%, list=25%, signal=75%	129401/53371/10204/29107/55916
GO:0000785	CC	GO:0000785	chromatin	215	0.3393	1.44483	0.00119988	0.015115	0.0116553	2801	tags=44%, list=32%, signal=30%	157570/55723/10036/8208/8365/4582/7703/5888/5933/113130/1019/1051/1107/10370/8110/1869/146956/8330/8334/3015/8349/8520/3070/4176/54069/27085/10062/55010/5111/10769/5422/10622/6839/54962/7112/51377/29128/79968/81611/367/408/80816/57658/824/23468/1058/1111/79075/2146/3005/8329/723790/8348/440689/8347/3017/8357/126961/333932/8353/121504/8370/8366/3159/8091/3146/3662/3726/3835/9314/4171/2956/4678/233…
GO:0005911	CC	GO:0005911	cell-cell junction	226	0.340009	1.45046	0.00119988	0.015115	0.0116553	2322	tags=39%, list=27%, signal=29%	23150/5244/57530/1803/6624/3678/3655/3801/6330/11346/84962/154810/360/999/1019/634/9069/23562/1496/1500/1894/2258/2700/57493/128239/54800/143098/5819/51294/26025/5175/5872/6546/9414/10791/7422/7533/87/9472/51421/288/301/659/794/317762/11135/1013/1041/5010/51208/79827/26047/23586/1674/23136/1969/83481/2264/23769/55691/5348/2549/2702/2707/349149/152404/286676/58494/120425/57608/3741/3875/3856/51599…
GO:0032103	BP	GO:0032103	positive regulation of response to external stimulus	145	0.363415	1.52224	0.00119988	0.015115	0.0116553	2866	tags=46%, list=33%, signal=31%	6348/414062/55601/64332/26471/6280/3627/23604/2113/8829/6279/7099/347733/199/718/728/923/1051/6387/3576/79132/2161/2621/4035/4233/5155/7052/7057/7422/659/6352/729230/4064/972/1050/1268/1435/1907/2152/8817/2358/2896/3146/3592/3593/23765/84818/3553/9173/51561/3949/3965/283131/80310/5159/5734/5764/9037/400709/7056/7060/7098/51284/7124/54209/10497
GO:0032956	BP	GO:0032956	regulation of actin cytoskeleton organization	160	0.357303	1.50412	0.00119988	0.015115	0.0116553	2708	tags=42%, list=31%, signal=30%	57175/388/58480/1490/10602/342184/6624/2934/8829/57580/285590/11346/246/348110/8851/10391/23406/1436/1496/6387/1894/9535/4035/4233/4853/5063/5154/90102/130271/389/171024/29767/8936/395/7984/55616/10677/274/822/55704/11135/148170/23332/2017/23191/8477/3383/133746/10787/5058/5159/5629/5734/10411/5921/28984/5999/171177/27289/8153/390/6385/9037/440335/6712/51332/3925/79933
GO:0043434	BP	GO:0043434	response to peptide hormone	176	0.349828	1.47781	0.00119988	0.015115	0.0116553	1862	tags=35%, list=22%, signal=28%	6678/133/83990/1490/990/2534/5579/6775/677/445/9564/760/27101/1019/634/1277/64506/1393/6387/1583/1959/1978/100132074/2822/3488/5106/5166/5872/143686/9021/6653/6272/6773/8614/9882/7049/8743/301/245973/534/632/655/694/7832/857/8837/1395/1536/23191/8891/2200/2549/2690/2852/2887/10014/3291/3383/3553/3645/3718
GO:0050769	BP	GO:0050769	positive regulation of neurogenesis	209	0.344613	1.46611	0.00119988	0.015115	0.0116553	1722	tags=32%, list=20%, signal=26%	6348/604/1524/4914/6280/650/2534/3655/8829/5270/57698/347733/6387/1742/1869/1894/2043/2119/2335/100132074/3280/3082/3398/6453/8997/3976/4035/4036/4602/4830/4897/5063/5649/8482/6474/55714/7422/7436/7516/6935/389658/10677/627/221336/80823/274/655/659/8536/729230/8837/1268/1272/1435/23191/1638/27185/22943/1809/80237/2146/55179/2737/2852/2896/9001
GO:0070482	BP	GO:0070482	response to oxygen levels	183	0.352322	1.49054	0.00119988	0.015115	0.0116553	2510	tags=40%, list=29%, signal=29%	2034/378938/133/358/650/83990/1490/54541/1803/2113/7015/677/94/100/84962/360/768/784/1019/10370/1277/64506/6387/1869/1978/28996/3162/4151/4602/10213/6546/8614/6839/7049/7057/7422/10449/191/205/51129/468/655/824/857/952/1026/8837/1141/1536/1543/112399/30001/3099/3291/3383/3708/3741/4323/79625/10397/4763/4929/5021/5024/5058/5159/65018/5366/5702/5740/5764/28984/6095/6261
GO:0010008	CC	GO:0010008	endosome membrane	155	0.359353	1.51077	0.0012	0.015115	0.0116553	2802	tags=43%, list=32%, signal=30%	84168/151636/968/4914/388/929/29126/3109/3115/3119/3122/3127/3665/4360/7099/9744/23621/8938/2043/221472/10457/3108/3117/10410/6490/84440/5872/338382/6556/285195/29887/6653/6272/284417/23555/57406/118429/301/857/911/50489/23603/22943/3113/3120/3123/3134/57535/63971/27074/3949/753/4689/10397/5662/64284/11031/387849/171177/7781/90203/8877/7037/7098/51284/10040/53373
GO:0044839	BP	GO:0044839	cell cycle G2/M phase transition	124	0.369029	1.53317	0.0012	0.015115	0.0116553	1778	tags=36%, list=21%, signal=29%	9088/672/993/990/63967/4998/22822/84962/641/1017/1019/51514/84930/9833/10733/10213/5889/90381/203068/7480/79915/79866/84446/8555/995/983/1026/55835/22995/79959/1111/9793/23332/11064/29980/26271/2305/29933/115106/55142/54801/55559/93323/8091/3306
GO:0050670	BP	GO:0050670	regulation of lymphocyte proliferation	110	0.37605	1.55273	0.00120012	0.015115	0.0116553	2910	tags=49%, list=34%, signal=33%	604/2213/11148/29126/958/3109/3115/3559/7099/100/199/923/1051/10457/3280/8654/6441/11326/301/384/79915/6352/729230/30835/952/970/972/942/1026/1141/3113/3146/3485/3592/3593/3553/51561/3565/3567/3574/3718/3965/5074/5621/5788/6385/7037/27242/7293/944/8744/7412/64115/7535
GO:0006650	BP	GO:0006650	glycerophospholipid metabolic process	100	0.38195	1.56625	0.00120072	0.015115	0.0116553	2660	tags=48%, list=31%, signal=34%	8605/23682/5168/114884/84962/246/1071/1436/2822/3613/84879/5154/5155/51365/9021/57406/56895/7915/377/824/8895/1606/2171/2358/8811/84803/56261/2819/8821/117283/3949/200879/64900/129642/114879/5159/128869/138429/83394/8398/5920/151056/59338/57664/256987/23446/204962/8651
GO:1901998	BP	GO:1901998	toxin transport	17	0.607218	1.91617	0.00121816	0.0153174	0.0118113	1290	tags=47%, list=15%, signal=40%	9619/84168/23428/29126/8829/118429/10576/10693
GO:0022617	BP	GO:0022617	extracellular matrix disassembly	41	0.478197	1.79485	0.00122113	0.0153374	0.0118268	2129	tags=51%, list=25%, signal=39%	1803/2113/6624/285590/2/4921/4035/4320/4318/824/960/23332/1513/1520/780/2264/5654/4241/4322/4323/4327
GO:0005436	MF	GO:0005436	sodium:phosphate symporter activity	4	-0.859694	-2.10562	0.00125431	0.0157013	0.0121074	1215	tags=100%, list=14%, signal=86%	6569/10568/142680
GO:0030002	BP	GO:0030002	cellular anion homeostasis	4	-0.858071	-2.10164	0.00125431	0.0157013	0.0121074	1229	tags=100%, list=14%, signal=86%	6569/10568/142680
GO:0030320	BP	GO:0030320	cellular monovalent inorganic anion homeostasis	4	-0.858071	-2.10164	0.00125431	0.0157013	0.0121074	1229	tags=100%, list=14%, signal=86%	6569/10568/142680
GO:0019184	BP	GO:0019184	nonribosomal peptide biosynthetic process	11	0.690955	1.95392	0.0012926	0.0161273	0.0124359	1637	tags=73%, list=19%, signal=59%	79094/494143/79017/2678/23657/56898/2679/2686
GO:0005520	MF	GO:0005520	insulin-like growth factor binding	20	0.571611	1.87674	0.00129926	0.0161273	0.0124359	1854	tags=55%, list=21%, signal=43%	3690/1490/3655/3486/3487/3488/3490/3491/5654/3485/3691
GO:0001503	BP	GO:0001503	ossification	190	0.348123	1.47493	0.00129987	0.0161273	0.0124359	2851	tags=45%, list=33%, signal=31%	6348/8519/6678/650/1490/1052/1291/9249/285590/246/1051/1277/55790/4921/1959/79633/2261/2822/10457/3082/3398/3486/3488/285313/91461/22800/8482/6474/6546/29887/6272/6696/55151/7480/90/92/93/84059/10189/632/655/659/3491/1021/1050/6320/23601/1435/1513/22943/1969/2201/26271/8817/63979/10272/2735/2737/3336/3399/182/3726/83999/4322/4323/4664/4665/4763/255743/9260/5245/5364/5734/5764/359845/4920/6261/409…
GO:0046983	MF	GO:0046983	protein dimerization activity	576	0.2965	1.2925	0.00129987	0.0161273	0.0124359	1896	tags=30%, list=22%, signal=25%	9619/8553/2034/10855/4914/56952/340061/650/1052/1649/1803/115361/2941/8365/22807/11343/4436/23649/6241/7015/7099/347733/7298/9429/11332/51816/56938/440/558/597/641/27101/833/919/999/634/4680/1051/387103/1180/1436/64858/1869/1870/1894/2065/2353/2617/2634/79017/10755/64388/8330/8334/3015/8349/3280/55502/3082/3162/126393/3398/3613/3624/3757/3956/4085/166785/143098/5819/4861/4883/169611/5154/5155/235…
GO:0050890	BP	GO:0050890	cognition	133	0.365299	1.5235	0.00129987	0.0161273	0.0124359	2441	tags=41%, list=28%, signal=30%	793/1524/4914/2534/3122/3678/8516/11346/85461/10396/8704/728/1051/1393/1742/1959/2237/2258/2353/100132074/8997/10769/5896/5649/6446/23657/29767/7436/577/6310/627/80823/84446/7832/1141/1268/26047/23191/22943/8811/152789/3949/4130/4311/65009/4763/54413/4900/5021/56924/8398/5621/5764/5923
GO:0051235	BP	GO:0051235	maintenance of location	134	0.363162	1.51538	0.00129987	0.0161273	0.0124359	2884	tags=47%, list=33%, signal=32%	9619/6348/19/3690/6280/3627/1649/2934/6279/718/825/2149/3638/11015/10062/5031/6546/6653/55151/158219/9472/288/187/23568/602/857/1193/79789/6373/199699/84649/23136/30001/9002/2200/2201/2852/2901/9001/3099/3270/152404/3553/3708/56704/4188/8204/5144/65018/5788/22821/6261/7781/440335/6713/23345/7070/83660/7124/4796/53373/10345/54832
GO:0055074	BP	GO:0055074	calcium ion homeostasis	202	0.341601	1.45079	0.00129987	0.0161273	0.0124359	2828	tags=44%, list=33%, signal=30%	6348/793/1524/133/84239/493/958/3627/1649/2534/2841/9290/5579/11346/728/773/784/825/6387/10800/1742/2149/4035/5026/5031/6546/29887/8614/7052/55151/148/9472/187/468/491/114897/794/857/6352/729230/952/10518/1193/1268/6373/27185/1815/1907/30001/2151/9002/2357/2358/8811/2769/2852/2828/8477/2906/9001/3146/3270/3708/56704/3741/55013/4828/10874/5021/5023/5024/5144/5314/8398/5621/5732/5734/5739/5788/2282…
GO:0055082	BP	GO:0055082	cellular chemical homeostasis	328	0.318519	1.37272	0.00129987	0.0161273	0.0124359	2912	tags=43%, list=34%, signal=29%	6348/793/1524/23682/6280/133/84239/493/958/3627/1649/2534/2841/9290/5579/6279/11346/9429/478/8938/728/760/773/784/825/6387/10800/1742/2149/2621/2822/9843/3162/3956/4035/4502/4830/5026/5031/5106/6344/6556/1318/113235/83697/6546/285195/8614/7052/55151/148/9472/187/408/468/491/245973/534/114897/794/857/6352/729230/952/10518/1193/1203/54982/1268/6373/79901/84649/27185/23312/1815/1907/151176/30001/215…
GO:0000502	CC	GO:0000502	proteasome complex	20	-0.404717	-2.2488	0.00130548	0.0161433	0.0124482	1697	tags=75%, list=20%, signal=60%	5682/5683/5686/5691/5693/5694/5695/5700/5701/5706/5719/5714/10197/5887/90637
GO:0006376	BP	GO:0006376	mRNA splice site selection	20	-0.54758	-3.04263	0.00130548	0.0161433	0.0124482	1451	tags=75%, list=17%, signal=63%	26871/26870/26869/6060/26824/100151683/101954273/101954266/101954267/26863/26864/6631/135295/285962/91746
GO:1905369	CC	GO:1905369	endopeptidase complex	20	-0.404717	-2.2488	0.00130548	0.0161433	0.0124482	1697	tags=75%, list=20%, signal=60%	5682/5683/5686/5691/5693/5694/5695/5700/5701/5706/5719/5714/10197/5887/90637
GO:0030516	BP	GO:0030516	regulation of axon extension	49	0.450937	1.73713	0.00131353	0.0162248	0.0125111	2545	tags=55%, list=29%, signal=39%	8829/57698/8851/6387/2335/4035/4133/4897/10500/8482/7422/659/2017/23191/27185/5058/91584/65078/7869/10512/223117/6405/56920/64218/57715/9037/10501
GO:0005089	MF	GO:0005089	Rho guanyl-nucleotide exchange factor activity	45	0.462115	1.75953	0.00131619	0.0162398	0.0125226	3234	tags=69%, list=37%, signal=43%	50650/57480/23263/57580/55701/139818/1894/221472/6453/8997/84033/26030/9828/26084/7984/10160/121512/23101/10276/5923/221178/7410/11214/55160/9826/27237/115557/389337/84904/9459/8874
GO:0070227	BP	GO:0070227	lymphocyte apoptotic process	33	0.496272	1.80943	0.00133498	0.0164534	0.0126874	1945	tags=52%, list=23%, signal=40%	1831/604/29126/3559/100/1942/407975/5896/384/10018/6352/972/27086/2737/3575/3718/3965
GO:0006692	BP	GO:0006692	prostanoid metabolic process	23	0.548225	1.85972	0.00138342	0.0169839	0.0130964	2406	tags=65%, list=28%, signal=47%	1646/8644/5742/1109/301/972/29785/1907/2171/3248/3553/5730/9536/5740/22949
GO:0006693	BP	GO:0006693	prostaglandin metabolic process	23	0.548225	1.85972	0.00138342	0.0169839	0.0130964	2406	tags=65%, list=28%, signal=47%	1646/8644/5742/1109/301/972/29785/1907/2171/3248/3553/5730/9536/5740/22949
GO:0010743	BP	GO:0010743	regulation of macrophage derived foam cell differentiation	13	0.64918	1.91552	0.0013836	0.0169839	0.0130964	1414	tags=54%, list=16%, signal=45%	9619/19/3690/1071/10062/1435/1437
GO:0010887	BP	GO:0010887	negative regulation of cholesterol storage	5	0.828939	1.84356	0.00138408	0.0169839	0.0130964	1000	tags=80%, list=12%, signal=71%	9619/19/10062/158219
GO:0045292	BP	GO:0045292	mRNA cis splicing, via spliceosome	21	-0.540803	-3.0774	0.00139082	0.0170478	0.0131457	1725	tags=81%, list=20%, signal=65%	25766/26871/26870/26869/6060/26824/100151683/101954273/101954266/101954267/26863/26864/6631/135295/6427/6428/285962
GO:0042181	BP	GO:0042181	ketone biosynthetic process	12	0.66591	1.92566	0.00139535	0.0170654	0.0131593	1400	tags=58%, list=16%, signal=49%	1588/133/8644/650/23590/27235/51805
GO:0032787	BP	GO:0032787	monocarboxylic acid metabolic process	261	0.328853	1.40879	0.00139986	0.0170654	0.0131593	3006	tags=46%, list=35%, signal=31%	1545/1645/1646/92126/26471/26227/8605/8644/672/54541/11343/5091/5742/10090/39/11332/6296/1109/246/440/718/634/4051/2203/2678/401494/3638/4200/166785/55706/10062/2494/79023/114880/5106/5166/5226/6319/23539/225/84696/10449/31/55289/23305/84532/55902/7915/230/240/241/301/313/63827/56898/857/972/1268/1543/1548/1565/29785/747/221955/84649/1737/55268/1907/387712/151176/10613/2171/9415/2264/10841/2819/3…
GO:0048699	BP	GO:0048699	generation of neurons	657	0.29132	1.27235	0.00139986	0.0170654	0.0131593	2916	tags=40%, list=34%, signal=28%	55715/6348/604/8553/1952/1524/79659/4914/4983/26227/6280/133/650/54541/1719/2534/3655/8829/639/57580/349667/5270/57698/7015/10100/347733/10090/558/718/999/8851/1051/1436/1496/1522/6387/1742/54567/26052/1869/1894/1942/1959/2043/2119/79633/2258/2335/2348/100132074/2621/3280/55502/3082/28996/3398/285313/3624/81618/6453/8997/84623/3956/59352/3976/4035/4036/11178/4133/266727/4233/4602/4830/4897/4974/5…
GO:0120035	BP	GO:0120035	regulation of plasma membrane bounded cell projection organization	311	0.317301	1.36517	0.00139986	0.0170654	0.0131593	2578	tags=39%, list=30%, signal=28%	57175/2213/4914/6280/10602/5168/6624/2534/3655/8829/57580/349667/57698/347733/10090/348110/8851/1496/1522/6387/1742/26052/139818/1942/2043/2258/2335/54874/100132074/3082/81618/6453/8997/3956/4035/11178/4133/4830/4897/4974/5063/10769/5792/5649/6383/10500/8482/6474/6696/80725/55714/7422/7436/7533/577/389658/26053/10677/53335/627/80823/655/659/84446/8536/857/55704/952/960/11135/148170/54825/55835/88…
GO:2001234	BP	GO:2001234	negative regulation of apoptotic signaling pathway	94	0.388936	1.58969	0.00140112	0.0170654	0.0131593	1827	tags=38%, list=21%, signal=31%	1524/672/2534/2537/3655/4582/8829/7703/7015/597/1491/6387/220042/3082/3162/4318/7057/8743/10449/90/367/409/79915/627/960/972/1032/8837/1437/2017/80237/55179/63979/3383/3553/3574
GO:0050770	BP	GO:0050770	regulation of axonogenesis	89	0.392612	1.59833	0.0014014	0.0170654	0.0131593	2783	tags=49%, list=32%, signal=34%	8829/57698/347733/10090/8851/6387/1942/2043/2258/2335/4035/4133/4897/4974/5063/10500/8482/6474/6696/7422/627/659/84446/2017/23191/27185/1949/5058/91584/5364/8153/65078/7869/10512/223117/6405/56920/64218/57715/9037/10501/26037/7070/51330
GO:0010715	BP	GO:0010715	regulation of extracellular matrix disassembly	11	0.684519	1.93572	0.00141011	0.0171317	0.0132104	2112	tags=82%, list=24%, signal=62%	1803/2113/6624/4921/4035/23332/780/2264/4241
GO:0034101	BP	GO:0034101	erythrocyte homeostasis	51	0.446015	1.7262	0.00141214	0.0171317	0.0132104	2501	tags=49%, list=29%, signal=35%	272/604/2034/2113/677/558/28996/3162/3398/3624/4151/54892/7049/7422/91/92/1021/1054/3623/3718/55646/9935/3276/23543/6229
GO:0036010	BP	GO:0036010	protein localization to endosome	7	0.750195	1.86001	0.00141297	0.0171317	0.0132104	926	tags=57%, list=11%, signal=51%	151636/1950/8829/6653
GO:1902946	BP	GO:1902946	protein localization to early endosome	7	0.750195	1.86001	0.00141297	0.0171317	0.0132104	926	tags=57%, list=11%, signal=51%	151636/1950/8829/6653
GO:1903035	BP	GO:1903035	negative regulation of response to wounding	47	0.458412	1.75579	0.00141672	0.0171585	0.0132311	1521	tags=43%, list=18%, signal=35%	5627/5270/634/2043/2161/58529/5154/5155/90102/710/6696/7057/7448/114897/135228/928/1026/23332/11221/83481
GO:0070229	BP	GO:0070229	negative regulation of lymphocyte apoptotic process	19	0.583657	1.89201	0.00141859	0.0171627	0.0132343	2620	tags=74%, list=30%, signal=51%	1831/604/100/1942/407975/5896/384/6352/972/27086/3575/3718/171558/57864
GO:0061045	BP	GO:0061045	negative regulation of wound healing	42	0.470517	1.77239	0.00142262	0.0171928	0.0132575	1521	tags=43%, list=18%, signal=35%	5627/5270/634/2161/58529/5154/5155/90102/710/7057/7448/114897/135228/928/1026/23332/11221/83481
GO:0044773	BP	GO:0044773	mitotic DNA damage checkpoint	41	0.47723	1.79122	0.00142465	0.0171987	0.0132621	1496	tags=44%, list=17%, signal=36%	63967/4436/4582/641/1017/1869/146956/5111/10769/7027/54962/84446/7832/995/983/1026/29980/79733
GO:0030968	BP	GO:0030968	endoplasmic reticulum unfolded protein response	37	0.479205	1.77436	0.00143135	0.017261	0.0133101	1540	tags=41%, list=18%, signal=33%	6347/1649/440/153222/1491/3576/11015/23645/8614/468/10018/10106/10595/30001/2134
GO:0045824	BP	GO:0045824	negative regulation of innate immune response	29	0.520194	1.85449	0.00145424	0.0175182	0.0135085	2856	tags=69%, list=33%, signal=46%	54625/5272/2/634/79132/9111/10062/710/11326/409/11221/2896/3134/11213/3965/100507436/84166/25939/56833/7301
GO:0042555	CC	GO:0042555	MCM complex	9	0.704498	1.88521	0.00146663	0.0176485	0.0136089	706	tags=67%, list=8%, signal=61%	84515/4173/4174/4172/4175/4176
GO:0005891	CC	GO:0005891	voltage-gated calcium channel complex	25	0.540039	1.86669	0.00147415	0.0177009	0.0136493	3589	tags=92%, list=42%, signal=54%	5142/773/55799/784/785/93589/57828/3306/5144/6261/774/777/778/8913/8912/8911/782/59285/59284/59283/117155/257062/25858
GO:0035987	BP	GO:0035987	endodermal cell differentiation	25	0.538585	1.86167	0.00147415	0.0177009	0.0136493	2128	tags=56%, list=25%, signal=42%	3914/1291/3678/2335/3624/3679/4318/7448/1303/1289/22943/8091/3693/4323
GO:0006874	BP	GO:0006874	cellular calcium ion homeostasis	200	0.340565	1.44564	0.00149985	0.0179134	0.0138131	2828	tags=44%, list=33%, signal=30%	6348/793/1524/133/84239/493/958/3627/1649/2534/2841/9290/5579/11346/728/773/784/825/6387/10800/1742/2149/4035/5026/5031/6546/8614/7052/55151/148/9472/187/468/491/114897/794/857/6352/729230/952/10518/1193/1268/6373/27185/1815/1907/30001/2151/9002/2357/2358/8811/2769/2852/2828/8477/2906/9001/3146/3270/3708/56704/3741/55013/4828/10874/5021/5023/5024/5144/5314/8398/5621/5732/5734/5739/5788/22821/6261…
GO:0030855	BP	GO:0030855	epithelial cell differentiation	285	0.322005	1.38252	0.00149985	0.0179134	0.0138131	2862	tags=43%, list=33%, signal=30%	1645/1646/4914/4983/8644/650/3872/23764/8829/639/7298/677/81569/94/360/634/1051/79633/57493/3280/3398/338785/144501/3887/3892/3976/4233/4318/2494/5106/5111/5046/5155/5175/10733/5872/81537/23657/8407/7062/7041/9414/55151/7422/7480/81029/6935/26154/59/90/93/54507/230/301/307/367/26084/84913/56898/655/659/694/857/135228/54825/983/1021/1026/1028/1041/22995/84518/1513/1543/1601/79733/2022/1969/2146/25…
GO:0031344	BP	GO:0031344	regulation of cell projection organization	314	0.317191	1.36528	0.00149985	0.0179134	0.0138131	2578	tags=39%, list=30%, signal=28%	57175/2213/4914/6280/10602/5168/6624/2534/3655/8829/57580/349667/57698/347733/10090/348110/8851/1496/1522/6387/1742/26052/139818/1942/2043/2258/2335/54874/100132074/3082/81618/6453/8997/3956/4035/11178/4133/4830/4897/4974/5063/10769/5792/5649/6383/10500/8482/6474/6696/10253/80725/55714/7422/7436/7533/577/389658/26053/10677/53335/627/80823/655/659/84446/8536/857/55704/952/960/11135/148170/54825/55…
GO:0031400	BP	GO:0031400	negative regulation of protein modification process	227	0.335923	1.43319	0.00149985	0.0179134	0.0138131	2819	tags=44%, list=33%, signal=30%	151636/9467/493/56271/672/54541/2534/54625/7099/825/634/1844/1848/1942/114794/4616/9535/57493/3082/3486/389119/3843/3976/4085/84930/58529/23645/153769/9021/6653/10253/80725/55333/7078/54765/84327/408/409/9532/655/857/868/135228/1026/1028/1032/1050/23603/10106/10217/64798/22943/1843/11221/1849/2022/2192/26271/2305/10129/5348/2675/2852/124790/3553/388324/11213/9314/401265/753/51085/4763/171389/7026…
GO:0043547	BP	GO:0043547	positive regulation of GTPase activity	180	0.349744	1.47877	0.00149985	0.0179134	0.0138131	3234	tags=53%, list=37%, signal=34%	6347/6348/54453/57514/414062/4914/4983/259173/958/3655/8829/57580/25780/117289/23158/9744/79658/58504/83478/139818/23348/1894/2149/8997/10235/9628/90627/374403/9882/55803/577/141/10297/84986/395/64333/7984/408/55616/6367/6352/23603/9732/1969/2146/10144/8477/3383/4739/10276/4763/5364/5902/5909/23108/10411/5921/22821/5923/5996/6004/5999/8787/65078/26037/57568/57522/134957/84218/7070/11033/4301/1169…
GO:0030018	CC	GO:0030018	Z disc	79	0.399033	1.61361	0.0015015	0.017914	0.0138136	2322	tags=43%, list=27%, signal=32%	5142/4606/493/114907/55800/8470/11346/113146/825/58529/10529/84033/6546/171024/7273/87/148/286/288/274/1466/1674/2274/10539/3270/283284/26548/56704/3741/3856/5058/55742/64236/9260
GO:0043901	BP	GO:0043901	negative regulation of multi-organism process	67	0.424337	1.69159	0.00150376	0.0179218	0.0138197	2822	tags=51%, list=33%, signal=34%	6348/8519/4940/2934/3434/3559/91543/100/164668/79132/10875/24138/10410/3669/4599/4938/11251/6590/140564/60489/384/6352/8091/5654/23005/11043/8638/5629/5806/114132/7076/7124/10221/11074
GO:0008643	BP	GO:0008643	carbohydrate transport	56	0.439578	1.72076	0.00150799	0.0179531	0.0138438	2819	tags=57%, list=33%, signal=39%	358/5579/144195/7015/360/718/338557/84879/6518/6272/8218/2171/2887/3099/3553/55600/8013/6253/83667/26503/9481/154091/6515/11046/219855/85414/6523/6526/6527/10580/7124/57761
GO:0019218	BP	GO:0019218	regulation of steroid metabolic process	47	0.454339	1.74019	0.00151791	0.0180298	0.013903	2781	tags=57%, list=32%, signal=39%	9619/133/8644/650/3490/3638/6097/6319/158219/31/84649/1717/10613/2222/2224/2246/2264/3157/3553/3949/5629/5901/6095/6591/6713/6720/7124
GO:0017127	MF	GO:0017127	cholesterol transporter activity	5	0.823278	1.83097	0.00152249	0.0180298	0.013903	449	tags=60%, list=5%, signal=57%	9619/19/1071
GO:0060712	BP	GO:0060712	spongiotrophoblast layer development	5	0.826526	1.8382	0.00152249	0.0180298	0.013903	925	tags=80%, list=11%, signal=71%	133/677/3976/9021
GO:0120015	MF	GO:0120015	intermembrane sterol transfer activity	5	0.823278	1.83097	0.00152249	0.0180298	0.013903	449	tags=60%, list=5%, signal=57%	9619/19/1071
GO:0120020	MF	GO:0120020	intermembrane cholesterol transfer activity	5	0.823278	1.83097	0.00152249	0.0180298	0.013903	449	tags=60%, list=5%, signal=57%	9619/19/1071
GO:1905953	BP	GO:1905953	negative regulation of lipid localization	19	0.58233	1.88771	0.00152772	0.0180726	0.0139359	1000	tags=37%, list=12%, signal=33%	9619/19/1950/3690/10062/7057/158219
GO:0009068	BP	GO:0009068	aspartate family amino acid catabolic process	10	0.700854	1.92984	0.00155484	0.018374	0.0141684	169	tags=40%, list=2%, signal=39%	501/51268/10157/8528
GO:0030669	CC	GO:0030669	clathrin-coated endocytic vesicle membrane	28	0.516904	1.8307	0.00156104	0.0184278	0.0142098	1940	tags=54%, list=22%, signal=42%	3115/3119/3122/3127/1839/3117/50489/972/928/2535/3092/3113/3120/3123/3949
GO:0071385	BP	GO:0071385	cellular response to glucocorticoid stimulus	25	0.534445	1.84736	0.00157945	0.0186255	0.0143623	1909	tags=56%, list=22%, signal=44%	358/54541/114907/677/445/153222/1978/5106/301/10018/8837/2322/3383/687
GO:0010888	BP	GO:0010888	negative regulation of lipid storage	9	0.699372	1.87149	0.00158885	0.0187056	0.014424	1000	tags=56%, list=12%, signal=49%	9619/19/3690/10062/158219
GO:0002757	BP	GO:0002757	immune response-activating signal transduction	254	0.327342	1.40125	0.00159984	0.0187056	0.014424	2910	tags=42%, list=34%, signal=29%	5142/2212/80216/55601/2213/11148/64332/6280/340061/929/2534/3115/3119/3122/3127/3665/4582/5579/91543/6279/7099/100/9564/54718/728/784/919/634/79132/2822/3117/3543/5819/10062/5063/10213/338382/6441/9473/7100/28526/409/11119/10384/857/30835/10666/952/10462/50856/1380/1513/1520/23191/23586/8891/27086/2357/2358/199920/3113/3120/3123/3146/3329/3384/64135/3493/3494/3514/11213/3662/345611/7462/64922/868…
GO:0005765	CC	GO:0005765	lysosomal membrane	131	0.3625	1.51081	0.00159984	0.0187056	0.014424	3423	tags=57%, list=40%, signal=35%	151636/968/1950/10855/1291/1803/3109/3115/3119/3122/3127/375775/290/10396/4680/59345/2822/3108/3117/10410/81618/4035/4036/6272/7436/57406/8905/408/245973/972/1203/8895/79901/1601/221955/1917/2357/2896/3113/3120/3123/3134/57535/11133/27074/3949/4647/326624/220441/51296/26503/284129/7781/7098/51284/157753/53373/154664/20/23461/23457/215/5826/79026/1174/130340/1175/527/523/51382/566/2647/282991/5478…
GO:0030545	MF	GO:0030545	receptor regulator activity	223	0.336079	1.43296	0.00159984	0.0187056	0.014424	2900	tags=44%, list=34%, signal=30%	6347/6348/414062/1950/133/650/1490/3627/2920/83729/4254/51816/6387/3576/2258/10468/2621/9535/10457/64388/1839/3082/3624/3976/5154/5155/6398/10500/8482/6696/8614/8743/9966/7422/7480/79924/8862/627/655/685/387695/727/6367/6352/970/441549/6320/112616/1435/1437/6373/199699/22943/27123/1907/2202/8909/151176/2200/2246/8817/2896/3146/3589/3592/3593/3553/51561/9235/3565/3567/3574/3623/3626/182/4828/3084/…
GO:0044282	BP	GO:0044282	small molecule catabolic process	175	0.348617	1.47263	0.00159984	0.0187056	0.014424	1791	tags=33%, list=21%, signal=27%	259307/501/51268/10157/8644/493/23670/8528/84706/6472/6999/39/100/51816/164668/586/1491/4051/2523/2528/2653/2875/3613/166785/4521/5106/5226/5625/7378/225/84696/10449/55289/191/160428/217/221/7915/230/140564/60489/384/56898/642/57571/960/1268/1543/27294/55268/377841/10841/2527/23464/2710/3099/3176/414328
GO:0055086	BP	GO:0055086	nucleobase-containing small molecule metabolic process	293	0.320818	1.37826	0.00159984	0.0187056	0.014424	3315	tags=52%, list=38%, signal=33%	5142/83666/272/26471/51268/56952/10157/54541/4436/4837/6241/6472/6999/7298/11332/6296/100/51816/164668/554235/55790/1503/79077/1841/1854/5169/2203/2617/4200/55706/4830/4833/54981/4521/79023/8654/5166/5226/6240/6319/9414/7083/7374/7378/31/23305/84532/55902/56895/191/205/230/51074/140564/60489/516/952/983/129607/54205/1633/84649/1737/387712/377841/1969/2272/63979/27232/84803/2819/3000/9563/3099/802…
GO:0098852	CC	GO:0098852	lytic vacuole membrane	131	0.3625	1.51081	0.00159984	0.0187056	0.014424	3423	tags=57%, list=40%, signal=35%	151636/968/1950/10855/1291/1803/3109/3115/3119/3122/3127/375775/290/10396/4680/59345/2822/3108/3117/10410/81618/4035/4036/6272/7436/57406/8905/408/245973/972/1203/8895/79901/1601/221955/1917/2357/2896/3113/3120/3123/3134/57535/11133/27074/3949/4647/326624/220441/51296/26503/284129/7781/7098/51284/157753/53373/154664/20/23461/23457/215/5826/79026/1174/130340/1175/527/523/51382/566/2647/282991/5478…
GO:0099513	CC	GO:0099513	polymeric cytoskeletal fiber	304	0.318093	1.36806	0.00159984	0.0187056	0.014424	2898	tags=43%, list=34%, signal=30%	57175/23336/79659/7280/56271/342184/2534/23046/3801/3872/4210/8829/57326/57698/347733/51175/199/7461/23406/1393/26052/2258/347240/338785/144501/3887/3892/4133/9053/22924/4830/283726/6344/220134/6546/10253/203068/87/83543/301/10297/395/9532/332/827/10576/983/55835/9793/23332/79827/2017/1548/1674/27185/201625/146754/1809/6990/80258/2009/83481/2288/130540/8522/55970/2852/115106/55142/54801/55559/933…
GO:0007163	BP	GO:0007163	establishment or maintenance of cell polarity	94	0.386147	1.57829	0.00160128	0.0187056	0.014424	1406	tags=30%, list=16%, signal=25%	23150/4983/388/58480/358/6624/2934/57698/10090/81569/154810/2258/3280/4085/4133/9053/143098/389/54908/10253/55333/51421/286/84446/1058/9793/23332/286204
GO:1905952	BP	GO:1905952	regulation of lipid localization	56	0.437636	1.71316	0.00160853	0.0187706	0.0144742	1524	tags=34%, list=18%, signal=28%	9619/19/1588/1950/3690/5244/10396/718/1071/4035/4602/10062/6696/7057/158219/26154/114897/57540/151176
GO:0072528	BP	GO:0072528	pyrimidine-containing compound biosynthetic process	21	0.557482	1.85197	0.00161586	0.0188365	0.014525	1669	tags=57%, list=19%, signal=46%	7298/1503/1841/1854/4830/4833/7083/7378/56895/129607/1633/84803
GO:0072527	BP	GO:0072527	pyrimidine-containing compound metabolic process	44	0.464275	1.7601	0.00162305	0.0189002	0.0145741	3198	tags=68%, list=37%, signal=43%	7298/164668/1503/79077/1841/1854/5169/4830/4833/6240/7083/7374/7378/56895/140564/60489/129607/1633/84803/4907/4913/5631/60386/8277/1890/51733/57379/4329/9582/200316
GO:0014033	BP	GO:0014033	neural crest cell differentiation	43	0.462815	1.74975	0.0016247	0.0189002	0.0145741	2900	tags=63%, list=34%, signal=42%	4254/8829/2335/2348/3280/10500/8482/90/655/23603/182/84541/9221/3084/8828/7869/10512/223117/6405/56920/64218/57715/9037/10501/6591/6949/80326
GO:0043044	BP	GO:0043044	ATP-dependent chromatin remodeling	41	0.475717	1.78555	0.00162817	0.0189209	0.0145901	2258	tags=54%, list=26%, signal=40%	8365/64946/55839/55166/79682/387103/1107/54069/81611/1058/2491/64105/91687/79019/79172/201254/121504/8370/8366/23421/4678/11339
GO:0046579	BP	GO:0046579	positive regulation of Ras protein signal transduction	32	0.499796	1.81467	0.00164745	0.0191251	0.0147475	2708	tags=62%, list=31%, signal=43%	4914/2841/9290/4254/2057/2149/4853/408/26053/1435/2151/9002/2828/8477/3084/5159/221002/5923/65078/79933
GO:0014911	BP	GO:0014911	positive regulation of smooth muscle cell migration	25	0.53207	1.83915	0.00168474	0.0195378	0.0150657	2320	tags=60%, list=27%, signal=44%	8829/7015/199/3488/4035/5031/5155/7448/9510/6352/9732/8013/5058/80310/5159
GO:0034220	BP	GO:0034220	ion transmembrane transport	523	0.297974	1.2968	0.00169983	0.0196517	0.0151536	3317	tags=48%, list=38%, signal=31%	6347/3790/5142/9619/6348/1831/19/6329/8140/23428/140738/5244/358/84239/493/3627/1649/2534/2564/2669/6236/55800/6330/6335/10350/9429/306/57205/478/10396/57198/773/55799/784/785/825/1180/1393/1742/2149/2348/2565/2570/2621/2894/3757/9132/56479/54800/4036/4318/81831/152519/5026/5031/5649/6446/10110/6556/9194/23539/6510/1318/145389/6520/113235/83697/6541/23657/387254/9056/6546/285195/7057/147798/55151…
GO:0044437	CC	GO:0044437	vacuolar part	218	0.335901	1.43157	0.00169983	0.0196517	0.0151536	3423	tags=55%, list=40%, signal=34%	151636/968/1950/10855/340061/1291/23604/1803/3109/3115/3119/3122/3127/375775/80183/51816/290/10396/718/4680/59345/2822/3108/3117/10410/81618/4035/4036/338382/8635/6383/6448/6272/6948/284417/203068/7436/8714/57406/8905/408/245973/534/63827/10576/972/1203/8895/1513/1520/79901/1601/221955/79980/1917/2171/2331/2357/2717/2896/3113/3120/3123/3134/388697/345611/57535/11133/27074/3949/4647/5036/11240/515…
GO:0061448	BP	GO:0061448	connective tissue development	141	0.361189	1.51085	0.00169983	0.0196517	0.0151536	1682	tags=34%, list=19%, signal=28%	871/650/1490/1116/1291/285590/7298/94/1019/1277/85301/55790/2261/2822/3398/3696/5155/91461/25886/6097/140606/6474/6653/7045/7480/81029/6935/59/11173/655/659/3491/960/8837/1690/1303/7373/81578/1289/1435/1513/54360/84649/2202/8817/2297/2737/2828
GO:0007369	BP	GO:0007369	gastrulation	77	0.40357	1.62767	0.00170409	0.0196806	0.0151758	1908	tags=40%, list=22%, signal=32%	3690/3914/1291/3678/8516/2335/3624/3679/4318/23187/90102/7448/90/92/93/8862/187/84913/655/659/23332/1303/1289/286204/22943/1969/8091/3691/3693/23135/9314
GO:0046683	BP	GO:0046683	response to organophosphorus	61	0.427869	1.68973	0.00170631	0.0196859	0.01518	2828	tags=52%, list=33%, signal=36%	6678/1645/358/5983/7298/677/445/1277/1393/2353/3488/4830/5026/5031/6546/7480/9472/10518/50506/1843/2819/3553/3726/4327/5023/5024/5724/10411/6531/6720/7056/54795
GO:1904019	BP	GO:1904019	epithelial cell apoptotic process	53	0.435609	1.69463	0.00171147	0.0197251	0.0152102	2557	tags=49%, list=30%, signal=35%	6347/26471/8644/958/2934/7015/677/1869/1870/2621/3162/6272/7057/51129/409/659/8837/2852/3383/3565/3875/3856/79625/28984/9037/6424
GO:0030943	MF	GO:0030943	mitochondrion targeting sequence binding	3	-0.925101	-1.94978	0.00172068	0.0198108	0.0152763	650	tags=100%, list=8%, signal=92%	387990/84134
GO:1902911	CC	GO:1902911	protein kinase complex	43	0.462335	1.74794	0.00172624	0.0198544	0.0153099	1359	tags=44%, list=16%, signal=37%	9134/94/1017/1019/8851/1163/24138/5111/90/91/92/93/901/79616/983/1021/1026/1032/1164
GO:0045334	CC	GO:0045334	clathrin-coated endocytic vesicle	36	0.484021	1.78861	0.00173824	0.0199719	0.0154005	2559	tags=58%, list=30%, signal=41%	3115/3119/3122/3127/1839/3117/6441/50489/972/928/8218/2535/3092/3113/3120/3123/3949/4643/4920/653509/729238
GO:0048008	BP	GO:0048008	platelet-derived growth factor receptor signaling pathway	34	0.49451	1.80923	0.00174377	0.0200149	0.0154336	2411	tags=59%, list=28%, signal=43%	5157/8829/9564/4035/5154/5155/7422/868/64651/2152/3092/4643/65009/8013/56034/80310/5159/59338/5739/5795
GO:0042289	MF	GO:0042289	MHC class II protein binding	4	0.849026	1.75279	0.00176108	0.0201929	0.0155709	1306	tags=100%, list=15%, signal=85%	3872/343413/3902/972
GO:0051125	BP	GO:0051125	regulation of actin nucleation	15	0.618801	1.89438	0.00179917	0.0205236	0.0158259	1429	tags=53%, list=17%, signal=45%	57175/342184/2934/348110/1496/9535/8936/23191
GO:0032147	BP	GO:0032147	activation of protein kinase activity	147	0.357362	1.4982	0.00179982	0.0205236	0.0158259	3143	tags=52%, list=36%, signal=34%	2013/1950/3690/4914/650/1116/63967/7099/728/8851/1848/1894/2149/2258/4616/2621/3082/128239/5600/5063/5155/6556/7057/9966/7422/93/408/79866/727/29775/55704/6352/972/983/1815/1849/10595/2246/2357/2690/3593/3553/51561/3565/3672/5606/51776/5602/200958/3084/5058/56924/56034/65018/5621/5788/28984/8651/7098/7124/23043/10040/7161/8754/196883/112/113/115/134/150/151/152/154/238/283/284/51378
GO:0055085	BP	GO:0055085	transmembrane transport	682	0.289024	1.26307	0.00179982	0.0205236	0.0158259	2974	tags=41%, list=34%, signal=29%	6347/3790/5142/9619/6348/55917/1831/19/6329/8140/23428/140738/5244/358/84239/493/3627/1649/2534/2564/2669/5579/6236/55800/6330/6335/144195/7015/10350/9429/306/360/57205/478/10396/57198/718/760/773/55799/784/785/825/1180/1393/1742/2149/338557/2348/2565/2570/2621/2700/2894/3757/9132/56479/54800/4036/84879/4318/81831/152519/5026/5031/5551/10213/5649/6446/10110/6556/9194/23539/220963/6510/6518/1318/1…
GO:0071902	BP	GO:0071902	positive regulation of protein serine/threonine kinase activity	157	0.353881	1.48853	0.0018	0.0205236	0.0158259	2490	tags=41%, list=29%, signal=30%	1950/4914/493/650/958/990/4254/7099/84962/728/8851/1163/1436/1848/2043/2149/221472/4616/3082/128239/5600/22924/5063/8654/5154/5155/10253/7057/7422/7984/408/727/8536/972/983/1164/10926/22943/1815/1849/10595/2146/2246/8817/2322/2357/2690/8091/3553/345611/3672/5606/51776/5602/4486/200958/3084/5058/56034/80310/5159/5629/5788/28984/4920
GO:0016272	CC	GO:0016272	prefoldin complex	5	-0.774093	-2.10454	0.0018005	0.0205236	0.0158259	1954	tags=100%, list=23%, signal=77%	5202/5203/10471/7411
GO:0010634	BP	GO:0010634	positive regulation of epithelial cell migration	84	0.394384	1.60032	0.00180216	0.0205236	0.0158259	1867	tags=37%, list=22%, signal=29%	6678/3690/388/958/5168/2113/8829/154810/306/9564/2822/1839/3162/4233/4318/5155/10769/7057/7422/301/84913/659/23332/1512/2246/8817/27086/152007/2896/3146/57608
GO:0016538	MF	GO:0016538	cyclin-dependent protein serine/threonine kinase regulator activity	24	0.543136	1.85781	0.00180276	0.0205236	0.0158259	3749	tags=96%, list=43%, signal=54%	9134/1019/8851/1163/901/79616/81669/1026/1028/1032/1164/124790/388324/890/891/9133/85417/595/896/898/414194/8941/1030
GO:0005581	CC	GO:0005581	collagen trimer	39	0.473823	1.76898	0.00183505	0.02087	0.016093	4009	tags=90%, list=46%, signal=48%	1291/1307/1277/85301/1299/6441/114897/114904/1303/7373/81578/340267/1289/1896/8685/653509/729238/712/10882/147372/1300/1302/1305/1306/80781/57642/255631/1284/1290/1292/1293/256076/10584/8292/115908
GO:0010390	BP	GO:0010390	histone monoubiquitination	6	0.772443	1.81857	0.00186941	0.0212391	0.0163777	1008	tags=67%, list=12%, signal=59%	151636/7703/5896/29128
GO:0008092	MF	GO:0008092	cytoskeletal protein binding	459	0.301946	1.31045	0.00189981	0.021419	0.0165164	2380	tags=35%, list=28%, signal=27%	57175/5142/84168/23336/4600/4606/55930/4983/6280/56271/672/10602/57530/342184/6624/2534/2934/23046/3801/4210/6279/57698/8470/11346/165904/81569/199/84962/10123/558/675/27101/825/999/8851/634/100653515/7461/10391/23406/1496/26052/2036/2037/2258/10755/9535/128239/347240/11178/4133/22924/4599/57644/58529/10529/4830/4897/84033/29763/130271/201191/283726/220134/6546/50861/171024/29767/7273/22846/8936/…
GO:0031175	BP	GO:0031175	neuron projection development	435	0.304353	1.31993	0.00189981	0.021419	0.0165164	2895	tags=41%, list=34%, signal=29%	55715/1952/4914/4983/26227/6280/133/1719/2534/3655/8829/57580/349667/57698/10100/347733/10090/999/8851/1436/1496/1522/6387/1742/26052/1942/1959/2043/79633/2258/2335/2348/100132074/3280/3082/81618/6453/8997/84623/3956/59352/4035/4036/11178/4133/4830/4897/4974/5063/10769/5792/5872/5649/54538/201191/6383/10500/8482/6446/6474/6696/80725/50861/55714/7422/7436/8936/7533/577/84059/389658/288/3730/26053/…
GO:0031667	BP	GO:0031667	response to nutrient levels	185	0.346476	1.46643	0.00189981	0.021419	0.0165164	3368	tags=54%, list=39%, signal=34%	6678/19/968/4914/133/8644/83990/3627/1649/2534/2934/7298/100/360/440/445/717/784/1277/1978/2348/2621/8520/3162/1728/115209/5026/5106/5111/5166/6344/143686/6546/6653/6696/8614/7378/191/468/53335/632/655/659/652968/1026/1032/10518/1268/1536/1543/10634/3077/3157/3291/3383/3485/3553/3745/57535/11133/3949/4141/5019/5023/5024/27344/5366/5629/5723/5764/220441/83667/6566/6581/6591/6720/6753/6915/54795/74…
GO:0048545	BP	GO:0048545	response to steroid hormone	167	0.350606	1.47817	0.00189981	0.021419	0.0165164	2961	tags=47%, list=34%, signal=32%	6678/133/8644/358/672/1490/54541/114907/7298/677/199/306/445/478/760/1277/153222/1978/2353/3490/10062/2494/5106/5111/6097/6696/7041/7057/7533/21/301/367/409/10018/632/655/57658/57828/857/952/1026/8837/1536/1601/1843/2022/2274/2288/2322/27086/2852/3176/3291/3383/3485/687/7026/4929/8013/8204/5021/11240/5058/5245/5724/5732/5764/5901/23543/6095/6720/6753/7124/8626/10628/10413/678/15/20
GO:0051250	BP	GO:0051250	negative regulation of lymphocyte activation	73	0.404054	1.62163	0.00190343	0.021419	0.0165164	2885	tags=52%, list=33%, signal=35%	604/2213/29126/3559/558/634/1051/10875/10457/3398/3566/3624/3902/8654/6441/11326/301/384/972/942/2737/3077/3134/3142/3146/3623/3718/3965/100507436/5074/5621/6385/8651/201633/79626/27242/7301/64115
GO:0044242	BP	GO:0044242	cellular lipid catabolic process	69	0.412847	1.64901	0.001904	0.021419	0.0165164	1671	tags=38%, list=19%, signal=31%	1545/8605/8644/5168/11343/39/4051/2822/4035/166785/5106/6653/225/84696/57406/10449/55289/313/56898/1268/747/221955/55268/2171/2717/56261
GO:0046718	BP	GO:0046718	viral entry into host cell	69	0.41271	1.64846	0.001904	0.021419	0.0165164	2856	tags=52%, list=33%, signal=35%	8519/3690/1803/2934/3678/4360/290/558/2621/10410/3956/5819/10572/6510/857/30835/972/942/983/10332/23601/1380/1949/1969/3383/3693/3695/3949/3965/11043/5806/7037/7113/7293/11074/7301
GO:2001056	BP	GO:2001056	positive regulation of cysteine-type endopeptidase activity	69	0.410699	1.64043	0.001904	0.021419	0.0165164	2361	tags=45%, list=27%, signal=33%	6280/27113/837/1490/2534/2934/4210/6279/27018/2149/22861/8743/9966/408/10018/838/3491/1512/54205/112399/2152/2852/3092/3146/3329/3336/3965/114548/5023/9141/5366
GO:0106106	BP	GO:0106106	cold-induced thermogenesis	66	0.416109	1.657	0.00190438	0.021419	0.0165164	2350	tags=47%, list=27%, signal=34%	2034/1649/7099/1051/338557/50486/3566/4883/10062/115209/6319/7422/7480/57406/93/468/857/729230/2171/2271/2827/2887/8809/3565/3662/23135/5021/56034/51316/5334/23228
GO:0120161	BP	GO:0120161	regulation of cold-induced thermogenesis	66	0.416109	1.657	0.00190438	0.021419	0.0165164	2350	tags=47%, list=27%, signal=34%	2034/1649/7099/1051/338557/50486/3566/4883/10062/115209/6319/7422/7480/57406/93/468/857/729230/2171/2271/2827/2887/8809/3565/3662/23135/5021/56034/51316/5334/23228
GO:0002396	BP	GO:0002396	MHC protein complex assembly	4	0.846398	1.74736	0.00190784	0.0214363	0.0165297	609	tags=75%, list=7%, signal=70%	3109/3122/3108
GO:2001244	BP	GO:2001244	positive regulation of intrinsic apoptotic signaling pathway	22	0.550172	1.84413	0.00193092	0.0216739	0.0167129	1261	tags=41%, list=15%, signal=35%	26471/6280/27113/1649/6279/90427/5414/10018/857
GO:0036002	MF	GO:0036002	pre-mRNA binding	25	-0.526091	-3.2939	0.0019802	0.0222048	0.0171223	1548	tags=76%, list=18%, signal=63%	221662/55599/26871/26870/26869/6060/26824/267010/6066/100151683/101954273/101954266/101954267/26863/26864/6631/6662/6427/285962
GO:0043394	MF	GO:0043394	proteoglycan binding	26	0.530676	1.8475	0.00199349	0.0222574	0.0171629	2544	tags=62%, list=29%, signal=44%	3075/10855/51816/2335/10468/10457/4035/5792/7057/1289/1513/1520/60495/5764/5788/9037
GO:1902667	BP	GO:1902667	regulation of axon guidance	26	0.529644	1.84391	0.00199349	0.0222574	0.0171629	2545	tags=65%, list=29%, signal=46%	8829/347733/6387/10500/8482/7422/659/91584/7869/10512/223117/6405/56920/64218/57715/9037/10501
GO:0030139	CC	GO:0030139	endocytic vesicle	137	0.361033	1.50827	0.0019998	0.0222574	0.0171629	2559	tags=43%, list=30%, signal=31%	6678/19/23682/1803/2934/3115/3119/3122/3127/306/1742/338557/10755/3043/1839/3117/6453/4035/4036/84440/5872/338382/6441/6556/81029/409/857/9332/50489/972/928/8218/1536/2535/3092/3113/3120/3123/3134/3240/84329/345611/3693/3949/8685/9788/4643/4689/54413/100506658/122618/80223/64284/55647/11031/10981/4920/653509/729238
GO:0043405	BP	GO:0043405	regulation of MAP kinase activity	150	0.354202	1.48639	0.0019998	0.0222574	0.0171629	2819	tags=46%, list=33%, signal=32%	1950/4914/650/958/4254/7099/84962/728/1844/1848/2043/2149/221472/4616/3082/128239/5600/5063/8654/5154/5155/6653/10253/7057/7422/7984/408/655/727/857/972/983/22943/1815/1843/11221/1849/10595/2146/2246/8817/2322/2357/2690/3553/11213/3672/5606/51776/5602/4486/200958/4763/3084/5058/56034/80310/5159/5788/5795/5999/4920/10251/7124/23043/7161/10221/28951/57761
GO:0045088	BP	GO:0045088	regulation of innate immune response	186	0.343902	1.45584	0.0019998	0.0222574	0.0171629	2911	tags=44%, list=34%, signal=30%	83666/80216/55601/2213/6280/340061/929/2534/3665/4582/54625/91543/6279/5272/7099/79865/2/634/79132/3902/5819/9111/10062/5063/10622/10213/338382/710/6441/9021/7100/11274/11326/409/857/6352/30835/10666/10462/50856/1690/1513/1520/23586/11221/2358/2896/3134/3146/3329/3384/64135/3459/3592/3593/8807/11213/3662/345611/3965/64922/8685/100507436/200958/84166/171389/5058/118788/5702/25939/23098/653509/7292…
GO:0062012	BP	GO:0062012	regulation of small molecule metabolic process	182	0.342371	1.4481	0.0019998	0.0222574	0.0171629	2819	tags=44%, list=33%, signal=30%	9619/1950/26471/133/8644/493/650/672/54541/80183/6472/634/2203/2822/3486/3487/3638/4200/55706/1728/10062/79023/5031/5155/5166/10213/6097/6319/23657/9056/158219/225/31/205/301/114897/857/972/983/1268/51805/84649/1717/151176/10613/2171/2222/2224/2246/2264/27232/2819/2852/3157/3553/3565/3949/4199/51085/8013/51686/23178/5210/65018/5366/5629/5702/5724/5901/6095/83667/85414/6591/140710/10580/6713/6720/…
GO:2000146	BP	GO:2000146	negative regulation of cell motility	140	0.356002	1.48891	0.0019998	0.0222574	0.0171629	3070	tags=49%, list=36%, signal=32%	6347/57175/1545/8519/1524/1588/388/2841/94/100/199/348110/999/10370/6387/54567/3162/3486/3488/4035/90102/90627/55333/7057/22846/57406/727/29775/972/23332/23603/1809/1843/11221/2022/83481/2192/10014/3146/3565/182/9314/3868/753/65009/4763/7026/3084/11240/138429/5734/5764/5795/28984/6237/56833/57522/6915/7070/7076/10221/7414/130399/56999/104/575/134/4301
GO:0045137	BP	GO:0045137	development of primary sexual characteristics	103	0.374019	1.53714	0.0020008	0.0222574	0.0171629	2459	tags=43%, list=29%, signal=31%	1588/4914/26471/8644/83990/4254/4436/675/1051/10370/1299/3624/4036/4521/5872/6240/400629/8743/7422/91/92/9510/367/408/409/10018/11144/2175/2189/10272/3157/3205/3383/3623/10184/4323/4327/4678/8204/5159/59338/5806/9985/56729
GO:0016801	MF	GO:0016801	hydrolase activity, acting on ether bonds	6	0.768548	1.8094	0.00200294	0.0222591	0.0171641	1092	tags=67%, list=13%, signal=58%	2052/144110/246/191
GO:0006956	BP	GO:0006956	complement activation	58	0.42841	1.68469	0.00201025	0.0223182	0.0172097	1819	tags=38%, list=21%, signal=30%	3075/5627/2/51279/716/717/718/720/721/728/5199/3543/710/28526/11326/7448/727/1380/3493/3494/3514/3553
GO:0051865	BP	GO:0051865	protein autoubiquitination	21	0.550482	1.82871	0.00204675	0.0227009	0.0175048	1008	tags=38%, list=12%, signal=34%	151636/672/54800/56852/5896/153769/29089/29128
GO:2001021	BP	GO:2001021	negative regulation of response to DNA damage stimulus	31	0.499242	1.80144	0.00206676	0.0229001	0.0176584	1756	tags=48%, list=20%, signal=39%	2187/4582/79000/6387/220042/55010/10721/116028/79915/960/972/1032/80237/26271/8091
GO:0006289	BP	GO:0006289	nucleotide-excision repair	26	0.526859	1.83421	0.00209842	0.0231518	0.0178526	2493	tags=62%, list=29%, signal=44%	83990/5983/675/3978/55247/5111/10714/5982/5984/5985/8533/4913/5424/5932/6118/6119
[truncated: 534 more rows]
