# Supplementary material for: A New Strategy for the Old Challenge of Thalidomide: Systems Biology Prioritization of Potential Immunomodulatory Drug (IMiD)-Targeted Transcription Factors
Source: Int J Mol Sci. 2023 Jul 15;24(14):11515. doi: 10.3390/ijms241411515 (PMC10380514; doi:10.3390/ijms241411515)
Supplement: Supplementary file 1 [file ijms-24-11515-s001.zip › Kowalski et al., 2023 - Table S8.xlsx]

## Sheet: TableS8
	ID	Description	BgRatio	pvalue	p.adjust	qvalue	geneID	Count
GO:0043010	GO:0043010	camera-type eye development	314/18670	2.28457e-07	0.000163447	7.34613e-05	ZEB1/ZEB2/KLF4/YY1/SP3/WT1	6
GO:0001654	GO:0001654	eye development	362/18670	5.26742e-07	0.000163447	7.34613e-05	ZEB1/ZEB2/KLF4/YY1/SP3/WT1	6
GO:0150063	GO:0150063	visual system development	366/18670	5.61749e-07	0.000163447	7.34613e-05	ZEB1/ZEB2/KLF4/YY1/SP3/WT1	6
GO:0048880	GO:0048880	sensory system development	371/18670	6.08177e-07	0.000163447	7.34613e-05	ZEB1/ZEB2/KLF4/YY1/SP3/WT1	6
GO:0007389	GO:0007389	pattern specification process	446/18670	1.77859e-06	0.000382396	0.000171868	ZEB1/ZEB2/YY1/WT1/SNAI1/GLI1	6
GO:0061448	GO:0061448	connective tissue development	273/18670	3.45342e-06	0.00056627	0.00025451	ZEB1/EGR1/WT1/SNAI1/SNAI2	5
GO:0043516	GO:0043516	regulation of DNA damage response, signal transduction by p53 class mediator	34/18670	3.68734e-06	0.00056627	0.00025451	HIC1/SNAI1/SNAI2	3
GO:0061614	GO:0061614	pri-miRNA transcription by RNA polymerase II	47/18670	9.91885e-06	0.00117807	0.000529485	KLF4/YY1/WT1	3
GO:0001101	GO:0001101	response to acid chemical	343/18670	1.04892e-05	0.00117807	0.000529485	ZEB1/EGR1/KLF4/YY1/KLF2	5
GO:0003002	GO:0003002	regionalization	351/18670	1.17279e-05	0.00117807	0.000529485	ZEB2/YY1/WT1/SNAI1/GLI1	5
GO:0030098	GO:0030098	lymphocyte differentiation	353/18670	1.20547e-05	0.00117807	0.000529485	ZEB1/EGR1/KLF6/SP3/BCL6	5
GO:0030111	GO:0030111	regulation of Wnt signaling pathway	363/18670	1.37977e-05	0.00123604	0.000555538	HIC1/EGR1/ZEB2/GLI1/SNAI2	5
GO:0060541	GO:0060541	respiratory system development	198/18670	2.62126e-05	0.00216758	0.000974216	SP3/WT1/KLF2/GLI1	4
GO:0071229	GO:0071229	cellular response to acid chemical	209/18670	3.23938e-05	0.00221113	0.00099379	ZEB1/EGR1/KLF4/KLF2	4
GO:0030178	GO:0030178	negative regulation of Wnt signaling pathway	210/18670	3.30043e-05	0.00221113	0.00099379	HIC1/EGR1/GLI1/SNAI2	4
GO:0072124	GO:0072124	regulation of glomerular mesangial cell proliferation	10/18670	3.49667e-05	0.00221113	0.00099379	EGR1/WT1	2
GO:0072203	GO:0072203	cell proliferation involved in metanephros development	10/18670	3.49667e-05	0.00221113	0.00099379	EGR1/WT1	2
GO:0060992	GO:0060992	response to fungicide	11/18670	4.27142e-05	0.00229589	0.00103188	KLF4/KLF2	2
GO:0061314	GO:0061314	Notch signaling involved in heart development	11/18670	4.27142e-05	0.00229589	0.00103188	SNAI1/SNAI2	2
GO:0072110	GO:0072110	glomerular mesangial cell proliferation	11/18670	4.27142e-05	0.00229589	0.00103188	EGR1/WT1	2
GO:0042368	GO:0042368	vitamin D biosynthetic process	12/18670	5.12296e-05	0.00255692	0.00114921	SNAI1/SNAI2	2
GO:0032642	GO:0032642	regulation of chemokine production	82/18670	5.31162e-05	0.00255692	0.00114921	EGR1/KLF4/SNAI2	3
GO:0030217	GO:0030217	T cell differentiation	240/18670	5.55662e-05	0.00255692	0.00114921	ZEB1/EGR1/SP3/BCL6	4
GO:0060420	GO:0060420	regulation of heart growth	84/18670	5.70848e-05	0.00255692	0.00114921	YY1/WT1/GLI1	3
GO:0030656	GO:0030656	regulation of vitamin metabolic process	13/18670	6.05116e-05	0.002602	0.00116947	SNAI1/SNAI2	2
GO:0032602	GO:0032602	chemokine production	89/18670	6.78451e-05	0.00268466	0.00120662	EGR1/KLF4/SNAI2	3
GO:0072216	GO:0072216	positive regulation of metanephros development	14/18670	7.05591e-05	0.00268466	0.00120662	EGR1/WT1	2
GO:1901722	GO:1901722	regulation of cell proliferation involved in kidney development	14/18670	7.05591e-05	0.00268466	0.00120662	EGR1/WT1	2
GO:0034616	GO:0034616	response to laminar fluid shear stress	15/18670	8.13707e-05	0.00268466	0.00120662	KLF4/KLF2	2
GO:0042362	GO:0042362	fat-soluble vitamin biosynthetic process	15/18670	8.13707e-05	0.00268466	0.00120662	SNAI1/SNAI2	2
GO:0043518	GO:0043518	negative regulation of DNA damage response, signal transduction by p53 class mediator	15/18670	8.13707e-05	0.00268466	0.00120662	SNAI1/SNAI2	2
GO:0090192	GO:0090192	regulation of glomerulus development	15/18670	8.13707e-05	0.00268466	0.00120662	EGR1/WT1	2
GO:0050810	GO:0050810	regulation of steroid biosynthetic process	95/18670	8.24127e-05	0.00268466	0.00120662	EGR1/SNAI1/SNAI2	3
GO:0072109	GO:0072109	glomerular mesangium development	16/18670	9.29453e-05	0.00285475	0.00128306	EGR1/WT1	2
GO:0072224	GO:0072224	metanephric glomerulus development	16/18670	9.29453e-05	0.00285475	0.00128306	EGR1/WT1	2
GO:0060485	GO:0060485	mesenchyme development	278/18670	9.82644e-05	0.00293428	0.00131881	ZEB2/WT1/SNAI1/SNAI2	4
GO:0003198	GO:0003198	epithelial to mesenchymal transition involved in endocardial cushion formation	17/18670	0.000105282	0.00305179	0.00137163	SNAI1/SNAI2	2
GO:0008630	GO:0008630	intrinsic apoptotic signaling pathway in response to DNA damage	104/18670	0.000107877	0.00305179	0.00137163	HIC1/SNAI1/SNAI2	3
GO:0030330	GO:0030330	DNA damage response, signal transduction by p53 class mediator	107/18670	0.000117383	0.00323556	0.00145422	HIC1/SNAI1/SNAI2	3
GO:0001818	GO:0001818	negative regulation of cytokine production	296/18670	0.000125192	0.00336453	0.00151219	KLF4/YY1/KLF2/BCL6	4
GO:0048593	GO:0048593	camera-type eye morphogenesis	112/18670	0.000134412	0.0034403	0.00154624	ZEB1/YY1/SP3	3
GO:0060419	GO:0060419	heart growth	112/18670	0.000134412	0.0034403	0.00154624	YY1/WT1/GLI1	3
GO:0046620	GO:0046620	regulation of organ growth	113/18670	0.000138	0.00345	0.0015506	YY1/WT1/GLI1	3
GO:0030218	GO:0030218	erythrocyte differentiation	114/18670	0.00014165	0.00346076	0.00155544	SP3/KLF2/BCL6	3
GO:0071498	GO:0071498	cellular response to fluid shear stress	21/18670	0.000162219	0.00371034	0.00166761	KLF4/KLF2	2
GO:0072111	GO:0072111	cell proliferation involved in kidney development	21/18670	0.000162219	0.00371034	0.00166761	EGR1/WT1	2
GO:2000810	GO:2000810	regulation of bicellular tight junction assembly	21/18670	0.000162219	0.00371034	0.00166761	SNAI1/SNAI2	2
GO:0034101	GO:0034101	erythrocyte homeostasis	122/18670	0.000173135	0.00387751	0.00174274	SP3/KLF2/BCL6	3
GO:0042359	GO:0042359	vitamin D metabolic process	22/18670	0.000178346	0.00390567	0.0017554	SNAI1/SNAI2	2
GO:0019218	GO:0019218	regulation of steroid metabolic process	124/18670	0.000181659	0.00390567	0.0017554	EGR1/SNAI1/SNAI2	3
GO:0072215	GO:0072215	regulation of metanephros development	23/18670	0.000195226	0.00411507	0.00184951	EGR1/WT1	2
GO:0060070	GO:0060070	canonical Wnt signaling pathway	335/18670	0.000201428	0.00416414	0.00187157	EGR1/KLF4/GLI1/SNAI2	4
GO:0003272	GO:0003272	endocardial cushion formation	24/18670	0.00021286	0.0041755	0.00187668	SNAI1/SNAI2	2
GO:0009110	GO:0009110	vitamin biosynthetic process	24/18670	0.00021286	0.0041755	0.00187668	SNAI1/SNAI2	2
GO:0030183	GO:0030183	B cell differentiation	131/18670	0.00021363	0.0041755	0.00187668	KLF6/SP3/BCL6	3
GO:0042770	GO:0042770	signal transduction in response to DNA damage	133/18670	0.000223391	0.00428832	0.00192738	HIC1/SNAI1/SNAI2	3
GO:0072012	GO:0072012	glomerulus vasculature development	25/18670	0.000231246	0.00436122	0.00196015	EGR1/WT1	2
GO:0048596	GO:0048596	embryonic camera-type eye morphogenesis	26/18670	0.000250382	0.00464071	0.00208576	ZEB1/SP3	2
GO:0061437	GO:0061437	renal system vasculature development	27/18670	0.000270268	0.00484231	0.00217637	EGR1/WT1	2
GO:0061440	GO:0061440	kidney vasculature development	27/18670	0.000270268	0.00484231	0.00217637	EGR1/WT1	2
GO:0031056	GO:0031056	regulation of histone modification	143/18670	0.000276546	0.00487356	0.00219042	BCL6/SNAI2/CTCF	3
GO:0003180	GO:0003180	aortic valve morphogenesis	28/18670	0.000290902	0.00493683	0.00221886	SNAI1/SNAI2	2
GO:0010894	GO:0010894	negative regulation of steroid biosynthetic process	28/18670	0.000290902	0.00493683	0.00221886	SNAI1/SNAI2	2
GO:0002262	GO:0002262	myeloid cell homeostasis	147/18670	0.000299906	0.00493683	0.00221886	SP3/KLF2/BCL6	3
GO:0071236	GO:0071236	cellular response to antibiotic	147/18670	0.000299906	0.00493683	0.00221886	EGR1/KLF4/KLF2	3
GO:0048592	GO:0048592	eye morphogenesis	149/18670	0.000312049	0.00493683	0.00221886	ZEB1/YY1/SP3	3
GO:0048730	GO:0048730	epidermis morphogenesis	29/18670	0.000312283	0.00493683	0.00221886	KLF4/SNAI1	2
GO:0060536	GO:0060536	cartilage morphogenesis	29/18670	0.000312283	0.00493683	0.00221886	SNAI1/SNAI2	2
GO:0045939	GO:0045939	negative regulation of steroid metabolic process	30/18670	0.00033441	0.00521001	0.00234164	SNAI1/SNAI2	2
GO:1902230	GO:1902230	negative regulation of intrinsic apoptotic signaling pathway in response to DNA damage	31/18670	0.000357282	0.00544557	0.00244751	SNAI1/SNAI2	2
GO:0014706	GO:0014706	striated muscle tissue development	390/18670	0.000359661	0.00544557	0.00244751	EGR1/YY1/WT1/GLI1	4
GO:0003176	GO:0003176	aortic valve development	32/18670	0.000380896	0.00553329	0.00248693	SNAI1/SNAI2	2
GO:0060317	GO:0060317	cardiac epithelial to mesenchymal transition	32/18670	0.000380896	0.00553329	0.00248693	SNAI1/SNAI2	2
GO:0061311	GO:0061311	cell surface receptor signaling pathway involved in heart development	32/18670	0.000380896	0.00553329	0.00248693	SNAI1/SNAI2	2
GO:0001503	GO:0001503	ossification	398/18670	0.000388464	0.00556798	0.00250252	SP3/SNAI1/GLI1/SNAI2	4
GO:0048821	GO:0048821	erythrocyte development	33/18670	0.000405253	0.00565776	0.00254287	KLF2/BCL6	2
GO:1901797	GO:1901797	negative regulation of signal transduction by p53 class mediator	33/18670	0.000405253	0.00565776	0.00254287	SNAI1/SNAI2	2
GO:0060537	GO:0060537	muscle tissue development	408/18670	0.000426756	0.00576954	0.00259312	EGR1/YY1/WT1/GLI1	4
GO:0048048	GO:0048048	embryonic eye morphogenesis	34/18670	0.000430351	0.00576954	0.00259312	ZEB1/SP3	2
GO:0007517	GO:0007517	muscle organ development	410/18670	0.000434728	0.00576954	0.00259312	EGR1/YY1/WT1/GLI1	4
GO:0019216	GO:0019216	regulation of lipid metabolic process	410/18670	0.000434728	0.00576954	0.00259312	EGR1/KLF4/SNAI1/SNAI2	4
GO:0003203	GO:0003203	endocardial cushion morphogenesis	35/18670	0.000456189	0.00598052	0.00268794	SNAI1/SNAI2	2
GO:0030324	GO:0030324	lung development	172/18670	0.000475123	0.00607518	0.00273049	SP3/KLF2/GLI1	3
GO:1901342	GO:1901342	regulation of vasculature development	422/18670	0.000484825	0.00607518	0.00273049	EGR1/KLF4/WT1/KLF2	4
GO:0030323	GO:0030323	respiratory tube development	176/18670	0.000508107	0.00607518	0.00273049	SP3/KLF2/GLI1	3
GO:0031076	GO:0031076	embryonic camera-type eye development	37/18670	0.000510078	0.00607518	0.00273049	ZEB1/SP3	2
GO:0034405	GO:0034405	response to fluid shear stress	37/18670	0.000510078	0.00607518	0.00273049	KLF4/KLF2	2
GO:1905314	GO:1905314	semi-lunar valve development	37/18670	0.000510078	0.00607518	0.00273049	SNAI1/SNAI2	2
GO:0048568	GO:0048568	embryonic organ development	428/18670	0.000511367	0.00607518	0.00273049	ZEB1/SP3/SNAI1/GLI1	4
GO:0051052	GO:0051052	regulation of DNA metabolic process	429/18670	0.000515889	0.00607518	0.00273049	KLF4/WT1/GLI1/BCL6	4
GO:0048608	GO:0048608	reproductive structure development	431/18670	0.000525021	0.00607518	0.00273049	SP3/WT1/SNAI1/GLI1	4
GO:0090090	GO:0090090	negative regulation of canonical Wnt signaling pathway	178/18670	0.000525136	0.00607518	0.00273049	EGR1/GLI1/SNAI2	3
GO:0071347	GO:0071347	cellular response to interleukin-1	179/18670	0.000533786	0.00607518	0.00273049	EGR1/YY1/KLF2	3
GO:0048732	GO:0048732	gland development	434/18670	0.000538934	0.00607518	0.00273049	SP3/WT1/GLI1/SNAI2	4
GO:0061458	GO:0061458	reproductive system development	434/18670	0.000538934	0.00607518	0.00273049	SP3/WT1/SNAI1/GLI1	4
GO:1901796	GO:1901796	regulation of signal transduction by p53 class mediator	180/18670	0.000542528	0.00607518	0.00273049	HIC1/SNAI1/SNAI2	3
GO:0022408	GO:0022408	negative regulation of cell-cell adhesion	181/18670	0.000551361	0.00611045	0.00274634	KLF4/BCL6/SNAI2	3
GO:1902229	GO:1902229	regulation of intrinsic apoptotic signaling pathway in response to DNA damage	39/18670	0.000566912	0.00621868	0.00279498	SNAI1/SNAI2	2
GO:1902275	GO:1902275	regulation of chromatin organization	185/18670	0.000587617	0.00629101	0.00282749	BCL6/SNAI2/CTCF	3
GO:0072210	GO:0072210	metanephric nephron development	40/18670	0.00059643	0.00629101	0.00282749	EGR1/WT1	2
GO:0090184	GO:0090184	positive regulation of kidney development	40/18670	0.00059643	0.00629101	0.00282749	EGR1/WT1	2
GO:0030308	GO:0030308	negative regulation of cell growth	186/18670	0.000596914	0.00629101	0.00282749	YY1/WT1/BCL6	3
GO:1901343	GO:1901343	negative regulation of vasculature development	187/18670	0.000606305	0.00632794	0.00284409	KLF4/WT1/KLF2	3
GO:1902893	GO:1902893	regulation of pri-miRNA transcription by RNA polymerase II	41/18670	0.000626681	0.00647771	0.0029114	YY1/WT1	2
GO:0071478	GO:0071478	cellular response to radiation	191/18670	0.000644815	0.00660168	0.00296712	EGR1/YY1/SNAI2	3
GO:0007219	GO:0007219	Notch signaling pathway	193/18670	0.000664644	0.0067405	0.00302951	SNAI1/BCL6/SNAI2	3
GO:0006775	GO:0006775	fat-soluble vitamin metabolic process	43/18670	0.000689375	0.00679316	0.00305318	SNAI1/SNAI2	2
GO:0045429	GO:0045429	positive regulation of nitric oxide biosynthetic process	43/18670	0.000689375	0.00679316	0.00305318	KLF4/KLF2	2
GO:0042110	GO:0042110	T cell activation	464/18670	0.000692966	0.00679316	0.00305318	ZEB1/EGR1/SP3/BCL6	4
GO:0006694	GO:0006694	steroid biosynthetic process	196/18670	0.000695114	0.00679316	0.00305318	EGR1/SNAI1/SNAI2	3
GO:0046890	GO:0046890	regulation of lipid biosynthetic process	198/18670	0.000715916	0.00686683	0.00308629	EGR1/SNAI1/SNAI2	3
GO:0003197	GO:0003197	endocardial cushion development	44/18670	0.000721816	0.00686683	0.00308629	SNAI1/SNAI2	2
GO:1904407	GO:1904407	positive regulation of nitric oxide metabolic process	44/18670	0.000721816	0.00686683	0.00308629	KLF4/KLF2	2
GO:0035265	GO:0035265	organ growth	204/18670	0.000780701	0.00736187	0.00330879	YY1/WT1/GLI1	3
GO:0016049	GO:0016049	cell growth	484/18670	0.000811648	0.00754771	0.00339231	ZEB2/YY1/WT1/BCL6	4
GO:0070555	GO:0070555	response to interleukin-1	207/18670	0.000814451	0.00754771	0.00339231	EGR1/YY1/KLF2	3
GO:0051216	GO:0051216	cartilage development	209/18670	0.00083746	0.00769461	0.00345834	ZEB1/SNAI1/SNAI2	3
GO:2001020	GO:2001020	regulation of response to DNA damage stimulus	214/18670	0.00089679	0.00816991	0.00367196	HIC1/SNAI1/SNAI2	3
GO:0009952	GO:0009952	anterior/posterior pattern specification	219/18670	0.000958736	0.00858867	0.00386017	ZEB2/YY1/WT1	3
GO:0048762	GO:0048762	mesenchymal cell differentiation	219/18670	0.000958736	0.00858867	0.00386017	ZEB2/SNAI1/SNAI2	3
GO:0003179	GO:0003179	heart valve morphogenesis	52/18670	0.00100744	0.00880487	0.00395734	SNAI1/SNAI2	2
GO:0060421	GO:0060421	positive regulation of heart growth	52/18670	0.00100744	0.00880487	0.00395734	WT1/GLI1	2
GO:0072132	GO:0072132	mesenchyme morphogenesis	52/18670	0.00100744	0.00880487	0.00395734	SNAI1/SNAI2	2
GO:0001649	GO:0001649	osteoblast differentiation	225/18670	0.00103659	0.00898655	0.004039	SNAI1/GLI1/SNAI2	3
GO:0035065	GO:0035065	regulation of histone acetylation	53/18670	0.00104639	0.00899894	0.00404457	SNAI2/CTCF	2
GO:0051054	GO:0051054	positive regulation of DNA metabolic process	228/18670	0.00107698	0.00918849	0.00412976	KLF4/WT1/GLI1	3
GO:0070830	GO:0070830	bicellular tight junction assembly	55/18670	0.00112643	0.00946028	0.00425191	SNAI1/SNAI2	2
GO:2000242	GO:2000242	negative regulation of reproductive process	55/18670	0.00112643	0.00946028	0.00425191	WT1/SNAI1	2
GO:0048738	GO:0048738	cardiac muscle tissue development	233/18670	0.00114649	0.00955408	0.00429407	YY1/WT1/GLI1	3
GO:0090183	GO:0090183	regulation of kidney development	56/18670	0.00116753	0.00958086	0.00430611	EGR1/WT1	2
GO:0120192	GO:0120192	tight junction assembly	56/18670	0.00116753	0.00958086	0.00430611	SNAI1/SNAI2	2
GO:0051055	GO:0051055	negative regulation of lipid biosynthetic process	57/18670	0.00120934	0.00977471	0.00439324	SNAI1/SNAI2	2
GO:1903428	GO:1903428	positive regulation of reactive oxygen species biosynthetic process	57/18670	0.00120934	0.00977471	0.00439324	KLF4/KLF2	2
GO:2000756	GO:2000756	regulation of peptidyl-lysine acetylation	59/18670	0.00129509	0.0103897	0.00466964	SNAI2/CTCF	2
GO:0120193	GO:0120193	tight junction organization	60/18670	0.00133903	0.0105949	0.00476185	SNAI1/SNAI2	2
GO:0048872	GO:0048872	homeostasis of number of cells	246/18670	0.00134037	0.0105949	0.00476185	SP3/KLF2/BCL6	3
GO:0097237	GO:0097237	cellular response to toxic substance	247/18670	0.00135609	0.0106408	0.00478252	EGR1/KLF4/KLF2	3
GO:0003170	GO:0003170	heart valve development	61/18670	0.00138368	0.0107335	0.00482417	SNAI1/SNAI2	2
GO:0045926	GO:0045926	negative regulation of growth	249/18670	0.00138787	0.0107335	0.00482417	YY1/WT1/BCL6	3
GO:0032835	GO:0032835	glomerulus development	62/18670	0.00142904	0.010973	0.0049318	EGR1/WT1	2
GO:2000027	GO:2000027	regulation of animal organ morphogenesis	253/18670	0.00145284	0.0110766	0.00497837	WT1/GLI1/SNAI2	3
GO:0046622	GO:0046622	positive regulation of organ growth	63/18670	0.0014751	0.0111672	0.00501907	WT1/GLI1	2
GO:0090596	GO:0090596	sensory organ morphogenesis	256/18670	0.0015028	0.0112973	0.00507756	ZEB1/YY1/SP3	3
GO:0043297	GO:0043297	apical junction assembly	64/18670	0.00152187	0.0113612	0.00510628	SNAI1/SNAI2	2
GO:0045428	GO:0045428	regulation of nitric oxide biosynthetic process	66/18670	0.00161752	0.011992	0.00538979	KLF4/KLF2	2
GO:0072331	GO:0072331	signal transduction by p53 class mediator	267/18670	0.00169526	0.0124822	0.00561012	HIC1/SNAI1/SNAI2	3
GO:1901617	GO:1901617	organic hydroxy compound biosynthetic process	271/18670	0.0017689	0.0129359	0.00581401	ZEB2/SNAI1/SNAI2	3
GO:0061515	GO:0061515	myeloid cell development	70/18670	0.00181724	0.0131995	0.00593251	KLF2/BCL6	2
GO:0071479	GO:0071479	cellular response to ionizing radiation	71/18670	0.00186891	0.0134837	0.00606026	EGR1/SNAI2	2
GO:0006305	GO:0006305	DNA alkylation	72/18670	0.00192128	0.013678	0.00614756	WT1/CTCF	2
GO:0006306	GO:0006306	DNA methylation	72/18670	0.00192128	0.013678	0.00614756	WT1/CTCF	2
GO:1901983	GO:1901983	regulation of protein acetylation	73/18670	0.00197434	0.0139633	0.00627579	SNAI2/CTCF	2
GO:1903671	GO:1903671	negative regulation of sprouting angiogenesis	74/18670	0.0020281	0.0142497	0.00640453	KLF4/KLF2	2
GO:0060828	GO:0060828	regulation of canonical Wnt signaling pathway	286/18670	0.0020629	0.0143509	0.00645001	EGR1/GLI1/SNAI2	3
GO:0001707	GO:0001707	mesoderm formation	75/18670	0.00208255	0.0143509	0.00645001	KLF4/SNAI1	2
GO:0021536	GO:0021536	diencephalon development	75/18670	0.00208255	0.0143509	0.00645001	ZEB2/GLI1	2
GO:0048562	GO:0048562	embryonic organ morphogenesis	288/18670	0.00210427	0.0143681	0.00645773	ZEB1/SP3/GLI1	3
GO:0007162	GO:0007162	negative regulation of cell adhesion	289/18670	0.00212514	0.0143681	0.00645773	KLF4/BCL6/SNAI2	3
GO:0097193	GO:0097193	intrinsic apoptotic signaling pathway	289/18670	0.00212514	0.0143681	0.00645773	HIC1/SNAI1/SNAI2	3
GO:0006809	GO:0006809	nitric oxide biosynthetic process	77/18670	0.00219353	0.0146462	0.00658273	KLF4/KLF2	2
GO:0048332	GO:0048332	mesoderm morphogenesis	77/18670	0.00219353	0.0146462	0.00658273	KLF4/SNAI1	2
GO:0055021	GO:0055021	regulation of cardiac muscle tissue growth	78/18670	0.00225005	0.0149309	0.00671066	YY1/GLI1	2
GO:0014032	GO:0014032	neural crest cell development	81/18670	0.00242373	0.0158873	0.00714052	ZEB2/SNAI2	2
GO:2001021	GO:2001021	negative regulation of response to DNA damage stimulus	81/18670	0.00242373	0.0158873	0.00714052	SNAI1/SNAI2	2
GO:0046209	GO:0046209	nitric oxide metabolic process	82/18670	0.002483	0.0161771	0.00727079	KLF4/KLF2	2
GO:0042113	GO:0042113	B cell activation	310/18670	0.00259388	0.0167977	0.00754971	KLF6/SP3/BCL6	3
GO:0014031	GO:0014031	mesenchymal cell development	85/18670	0.00266489	0.0169512	0.00761871	ZEB2/SNAI2	2
GO:0048864	GO:0048864	stem cell development	85/18670	0.00266489	0.0169512	0.00761871	ZEB2/SNAI2	2
GO:2001057	GO:2001057	reactive nitrogen species metabolic process	85/18670	0.00266489	0.0169512	0.00761871	KLF4/KLF2	2
GO:0001892	GO:0001892	embryonic placenta development	87/18670	0.00278955	0.0176398	0.00792819	SP3/SNAI1	2
GO:1901888	GO:1901888	regulation of cell junction assembly	88/18670	0.0028529	0.0179349	0.00806082	SNAI1/SNAI2	2
GO:0060021	GO:0060021	roof of mouth development	89/18670	0.00291692	0.0181254	0.00814644	SNAI1/SNAI2	2
GO:0097306	GO:0097306	cellular response to alcohol	89/18670	0.00291692	0.0181254	0.00814644	KLF4/KLF2	2
GO:0001656	GO:0001656	metanephros development	90/18670	0.00298162	0.0182116	0.00818519	EGR1/WT1	2
GO:0014033	GO:0014033	neural crest cell differentiation	90/18670	0.00298162	0.0182116	0.00818519	ZEB2/SNAI2	2
GO:0031058	GO:0031058	positive regulation of histone modification	90/18670	0.00298162	0.0182116	0.00818519	BCL6/SNAI2	2
GO:0046677	GO:0046677	response to antibiotic	327/18670	0.00301695	0.0183233	0.00823538	EGR1/KLF4/KLF2	3
GO:0001655	GO:0001655	urogenital system development	330/18670	0.00309577	0.0184423	0.00828888	EGR1/WT1/GLI1	3
GO:0045833	GO:0045833	negative regulation of lipid metabolic process	92/18670	0.00311304	0.0184423	0.00828888	SNAI1/SNAI2	2
GO:0008202	GO:0008202	steroid metabolic process	331/18670	0.00312233	0.0184423	0.00828888	EGR1/SNAI1/SNAI2	3
GO:0071214	GO:0071214	cellular response to abiotic stimulus	331/18670	0.00312233	0.0184423	0.00828888	EGR1/YY1/SNAI2	3
GO:0104004	GO:0104004	cellular response to environmental stimulus	331/18670	0.00312233	0.0184423	0.00828888	EGR1/YY1/SNAI2	3
GO:1901655	GO:1901655	cellular response to ketone	93/18670	0.00317976	0.0186789	0.00839522	KLF4/KLF2	2
GO:0044728	GO:0044728	DNA methylation or demethylation	94/18670	0.00324715	0.0189711	0.00852655	WT1/CTCF	2
GO:0033044	GO:0033044	regulation of chromosome organization	342/18670	0.0034238	0.0198951	0.00894182	BCL6/SNAI2/CTCF	3
GO:0043473	GO:0043473	pigmentation	98/18670	0.00352339	0.0202548	0.0091035	ZEB2/SNAI2	2
GO:2001243	GO:2001243	negative regulation of intrinsic apoptotic signaling pathway	98/18670	0.00352339	0.0202548	0.0091035	SNAI1/SNAI2	2
GO:0048638	GO:0048638	regulation of developmental growth	347/18670	0.00356657	0.0203939	0.00916604	YY1/WT1/GLI1	3
GO:0070301	GO:0070301	cellular response to hydrogen peroxide	99/18670	0.00359412	0.0204427	0.00918797	KLF4/KLF2	2
GO:0035282	GO:0035282	segmentation	100/18670	0.00366551	0.0206305	0.00927235	ZEB2/WT1	2
GO:0055024	GO:0055024	regulation of cardiac muscle tissue development	100/18670	0.00366551	0.0206305	0.00927235	YY1/GLI1	2
GO:1903426	GO:1903426	regulation of reactive oxygen species biosynthetic process	101/18670	0.00373756	0.0209264	0.00940537	KLF4/KLF2	2
GO:2000379	GO:2000379	positive regulation of reactive oxygen species metabolic process	102/18670	0.00381027	0.021223	0.00953867	KLF4/KLF2	2
GO:1905269	GO:1905269	positive regulation of chromatin organization	103/18670	0.00388365	0.0215202	0.00967225	BCL6/SNAI2	2
GO:0055017	GO:0055017	cardiac muscle tissue growth	105/18670	0.00403238	0.0222298	0.00999115	YY1/GLI1	2
GO:0042136	GO:0042136	neurotransmitter biosynthetic process	106/18670	0.00410773	0.0225296	0.0101259	KLF4/KLF2	2
GO:0043502	GO:0043502	regulation of muscle adaptation	107/18670	0.00418373	0.0227147	0.0102091	KLF4/YY1	2
GO:0062014	GO:0062014	negative regulation of small molecule metabolic process	107/18670	0.00418373	0.0227147	0.0102091	SNAI1/SNAI2	2
GO:0035690	GO:0035690	cellular response to drug	369/18670	0.00423822	0.0228949	0.0102901	EGR1/KLF4/KLF2	3
GO:0006275	GO:0006275	regulation of DNA replication	108/18670	0.0042604	0.0228996	0.0102922	GLI1/BCL6	2
GO:0045666	GO:0045666	positive regulation of neuron differentiation	371/18670	0.00430284	0.0230127	0.0103431	ZEB1/ZEB2/BCL6	3
GO:0001701	GO:0001701	in utero embryonic development	373/18670	0.00436807	0.0232459	0.0104479	SP3/SNAI1/KLF2	3
GO:0042035	GO:0042035	regulation of cytokine biosynthetic process	114/18670	0.00473406	0.0250695	0.0112675	EGR1/KLF4	2
GO:0042692	GO:0042692	muscle cell differentiation	385/18670	0.0047722	0.0251476	0.0113026	ZEB1/YY1/WT1	3
GO:0006304	GO:0006304	DNA modification	116/18670	0.00489714	0.0256801	0.0115419	WT1/CTCF	2
GO:0018205	GO:0018205	peptidyl-lysine modification	397/18670	0.00519846	0.0271279	0.0121926	EGR1/SNAI2/CTCF	3
GO:0022612	GO:0022612	gland morphogenesis	120/18670	0.00523103	0.027166	0.0122097	GLI1/SNAI2	2
GO:0001704	GO:0001704	formation of primary germ layer	121/18670	0.0053161	0.0273436	0.0122896	KLF4/SNAI1	2
GO:0043618	GO:0043618	regulation of transcription from RNA polymerase II promoter in response to stress	121/18670	0.0053161	0.0273436	0.0122896	EGR1/KLF2	2
GO:0043500	GO:0043500	muscle adaptation	122/18670	0.00540182	0.0274835	0.0123524	KLF4/YY1	2
GO:1903409	GO:1903409	reactive oxygen species biosynthetic process	122/18670	0.00540182	0.0274835	0.0123524	KLF4/KLF2	2
GO:0022407	GO:0022407	regulation of cell-cell adhesion	403/18670	0.00542	0.0274835	0.0123524	KLF4/BCL6/SNAI2	3
GO:0042089	GO:0042089	cytokine biosynthetic process	123/18670	0.00548817	0.0276985	0.0124491	EGR1/KLF4	2
GO:0007043	GO:0007043	cell-cell junction assembly	124/18670	0.00557517	0.0278758	0.0125288	SNAI1/SNAI2	2
GO:0042107	GO:0042107	cytokine metabolic process	124/18670	0.00557517	0.0278758	0.0125288	EGR1/KLF4	2
GO:0045667	GO:0045667	regulation of osteoblast differentiation	126/18670	0.00575106	0.0284903	0.0128049	GLI1/SNAI2	2
GO:0048706	GO:0048706	embryonic skeletal system development	126/18670	0.00575106	0.0284903	0.0128049	ZEB1/SP3	2
GO:0035270	GO:0035270	endocrine system development	127/18670	0.00583996	0.0286664	0.0128841	WT1/GLI1	2
GO:0043620	GO:0043620	regulation of DNA-templated transcription in response to stress	127/18670	0.00583996	0.0286664	0.0128841	EGR1/KLF2	2
GO:0001558	GO:0001558	regulation of cell growth	416/18670	0.00591949	0.0287939	0.0129414	YY1/WT1/BCL6	3
GO:0030099	GO:0030099	myeloid cell differentiation	416/18670	0.00591949	0.0287939	0.0129414	SP3/KLF2/BCL6	3
GO:1903038	GO:1903038	negative regulation of leukocyte cell-cell adhesion	129/18670	0.00601965	0.0291492	0.0131011	KLF4/BCL6	2
GO:0045995	GO:0045995	regulation of embryonic development	132/18670	0.00629392	0.0302052	0.0135757	KLF4/SNAI1	2
GO:0055007	GO:0055007	cardiac muscle cell differentiation	132/18670	0.00629392	0.0302052	0.0135757	YY1/WT1	2
GO:0006766	GO:0006766	vitamin metabolic process	134/18670	0.0064799	0.0309595	0.0139147	SNAI1/SNAI2	2
GO:0001889	GO:0001889	liver development	135/18670	0.00657384	0.0311316	0.0139921	SP3/GLI1	2
GO:0007498	GO:0007498	mesoderm development	135/18670	0.00657384	0.0311316	0.0139921	KLF4/SNAI1	2
GO:1903670	GO:1903670	regulation of sprouting angiogenesis	137/18670	0.00676357	0.0318896	0.0143328	KLF4/KLF2	2
GO:0061008	GO:0061008	hepaticobiliary system development	138/18670	0.00685937	0.0322001	0.0144723	SP3/GLI1	2
GO:0045580	GO:0045580	regulation of T cell differentiation	139/18670	0.0069558	0.0325108	0.0146119	ZEB1/BCL6	2
GO:0001837	GO:0001837	epithelial to mesenchymal transition	140/18670	0.00705284	0.0328217	0.0147517	SNAI1/SNAI2	2
GO:0072006	GO:0072006	nephron development	142/18670	0.00724878	0.0335185	0.0150649	EGR1/WT1	2
GO:0009314	GO:0009314	response to radiation	448/18670	0.00726495	0.0335185	0.0150649	EGR1/YY1/SNAI2	3
GO:0016570	GO:0016570	histone modification	454/18670	0.00753592	0.0346201	0.01556	BCL6/SNAI2/CTCF	3
GO:0035264	GO:0035264	multicellular organism growth	146/18670	0.00764806	0.0346906	0.0155916	SP2/KLF2	2
GO:0042542	GO:0042542	response to hydrogen peroxide	146/18670	0.00764806	0.0346906	0.0155916	KLF4/KLF2	2
GO:2000241	GO:2000241	regulation of reproductive process	146/18670	0.00764806	0.0346906	0.0155916	WT1/SNAI1	2
GO:0010212	GO:0010212	response to ionizing radiation	147/18670	0.00774941	0.0349321	0.0157002	EGR1/SNAI2	2
GO:0062012	GO:0062012	regulation of small molecule metabolic process	459/18670	0.00776631	0.0349321	0.0157002	EGR1/SNAI1/SNAI2	3
GO:0008544	GO:0008544	epidermis development	464/18670	0.00800088	0.0358373	0.016107	KLF4/SNAI1/GLI1	3
GO:0001890	GO:0001890	placenta development	152/18670	0.00826534	0.0367158	0.0165019	SP3/SNAI1	2
GO:0016202	GO:0016202	regulation of striated muscle tissue development	152/18670	0.00826534	0.0367158	0.0165019	YY1/GLI1	2
GO:0042133	GO:0042133	neurotransmitter metabolic process	153/18670	0.00837034	0.0370293	0.0166428	KLF4/KLF2	2
GO:0016569	GO:0016569	covalent chromatin modification	474/18670	0.00848264	0.0372197	0.0167284	BCL6/SNAI2/CTCF	3
GO:0050769	GO:0050769	positive regulation of neurogenesis	474/18670	0.00848264	0.0372197	0.0167284	ZEB1/ZEB2/BCL6	3
GO:1901861	GO:1901861	regulation of muscle tissue development	155/18670	0.00858217	0.0373592	0.0167911	YY1/GLI1	2
GO:0016573	GO:0016573	histone acetylation	156/18670	0.00868899	0.0373592	0.0167911	SNAI2/CTCF	2
GO:0030856	GO:0030856	regulation of epithelial cell differentiation	156/18670	0.00868899	0.0373592	0.0167911	ZEB1/ZEB2	2
GO:0045216	GO:0045216	cell-cell junction organization	156/18670	0.00868899	0.0373592	0.0167911	SNAI1/SNAI2	2
GO:0048634	GO:0048634	regulation of muscle organ development	156/18670	0.00868899	0.0373592	0.0167911	YY1/GLI1	2
GO:0002713	GO:0002713	negative regulation of B cell mediated immunity	10/18670	0.00907048	0.0373592	0.0167911	BCL6	1
GO:0002890	GO:0002890	negative regulation of immunoglobulin mediated immune response	10/18670	0.00907048	0.0373592	0.0167911	BCL6	1
GO:0002934	GO:0002934	desmosome organization	10/18670	0.00907048	0.0373592	0.0167911	SNAI2	1
GO:0021936	GO:0021936	regulation of cerebellar granule cell precursor proliferation	10/18670	0.00907048	0.0373592	0.0167911	GLI1	1
GO:0032836	GO:0032836	glomerular basement membrane development	10/18670	0.00907048	0.0373592	0.0167911	WT1	1
GO:0043379	GO:0043379	memory T cell differentiation	10/18670	0.00907048	0.0373592	0.0167911	BCL6	1
GO:0048021	GO:0048021	regulation of melanin biosynthetic process	10/18670	0.00907048	0.0373592	0.0167911	ZEB2	1
GO:0048570	GO:0048570	notochord morphogenesis	10/18670	0.00907048	0.0373592	0.0167911	GLI1	1
GO:0060033	GO:0060033	anatomical structure regression	10/18670	0.00907048	0.0373592	0.0167911	GLI1	1
GO:0060923	GO:0060923	cardiac muscle cell fate commitment	10/18670	0.00907048	0.0373592	0.0167911	WT1	1
GO:0090715	GO:0090715	immunological memory formation process	10/18670	0.00907048	0.0373592	0.0167911	BCL6	1
GO:0018393	GO:0018393	internal peptidyl-lysine acetylation	161/18670	0.0092321	0.0378798	0.017025	SNAI2/CTCF	2
GO:2001242	GO:2001242	regulation of intrinsic apoptotic signaling pathway	165/18670	0.00967734	0.0391286	0.0175863	SNAI1/SNAI2	2
GO:0006475	GO:0006475	internal protein amino acid acetylation	166/18670	0.00979013	0.0391286	0.0175863	SNAI2/CTCF	2
GO:0035051	GO:0035051	cardiocyte differentiation	167/18670	0.00990352	0.0391286	0.0175863	YY1/WT1	2
GO:0002638	GO:0002638	negative regulation of immunoglobulin production	11/18670	0.00997325	0.0391286	0.0175863	BCL6	1
GO:0033629	GO:0033629	negative regulation of cell adhesion mediated by integrin	11/18670	0.00997325	0.0391286	0.0175863	SNAI2	1
GO:0034115	GO:0034115	negative regulation of heterotypic cell-cell adhesion	11/18670	0.00997325	0.0391286	0.0175863	KLF4	1
GO:0045628	GO:0045628	regulation of T-helper 2 cell differentiation	11/18670	0.00997325	0.0391286	0.0175863	BCL6	1
GO:0046886	GO:0046886	positive regulation of hormone biosynthetic process	11/18670	0.00997325	0.0391286	0.0175863	EGR1	1
GO:0070587	GO:0070587	regulation of cell-cell adhesion involved in gastrulation	11/18670	0.00997325	0.0391286	0.0175863	KLF4	1
GO:0090193	GO:0090193	positive regulation of glomerulus development	11/18670	0.00997325	0.0391286	0.0175863	EGR1	1
GO:1904995	GO:1904995	negative regulation of leukocyte adhesion to vascular endothelial cell	11/18670	0.00997325	0.0391286	0.0175863	KLF4	1
GO:1905941	GO:1905941	positive regulation of gonad development	11/18670	0.00997325	0.0391286	0.0175863	WT1	1
GO:0034614	GO:0034614	cellular response to reactive oxygen species	168/18670	0.0100175	0.0391593	0.0176001	KLF4/KLF2	2
GO:0018394	GO:0018394	peptidyl-lysine acetylation	169/18670	0.0101321	0.0391797	0.0176093	SNAI2/CTCF	2
GO:0045619	GO:0045619	regulation of lymphocyte differentiation	169/18670	0.0101321	0.0391797	0.0176093	ZEB1/BCL6	2
GO:0060538	GO:0060538	skeletal muscle organ development	169/18670	0.0101321	0.0391797	0.0176093	EGR1/WT1	2
GO:0016525	GO:0016525	negative regulation of angiogenesis	173/18670	0.0105962	0.0405934	0.0182447	KLF4/KLF2	2
GO:2001252	GO:2001252	positive regulation of chromosome organization	174/18670	0.0107137	0.0405934	0.0182447	BCL6/SNAI2	2
GO:2000181	GO:2000181	negative regulation of blood vessel morphogenesis	175/18670	0.0108318	0.0405934	0.0182447	KLF4/KLF2	2
GO:0002903	GO:0002903	negative regulation of B cell apoptotic process	12/18670	0.0108753	0.0405934	0.0182447	BCL6	1
GO:0045080	GO:0045080	positive regulation of chemokine biosynthetic process	12/18670	0.0108753	0.0405934	0.0182447	EGR1	1
GO:0060707	GO:0060707	trophoblast giant cell differentiation	12/18670	0.0108753	0.0405934	0.0182447	SNAI1	1
GO:0070586	GO:0070586	cell-cell adhesion involved in gastrulation	12/18670	0.0108753	0.0405934	0.0182447	KLF4	1
GO:0070601	GO:0070601	centromeric sister chromatid cohesion	12/18670	0.0108753	0.0405934	0.0182447	CTCF	1
GO:1900376	GO:1900376	regulation of secondary metabolite biosynthetic process	12/18670	0.0108753	0.0405934	0.0182447	ZEB2	1
GO:2000341	GO:2000341	regulation of chemokine (C-X-C motif) ligand 2 production	12/18670	0.0108753	0.0405934	0.0182447	KLF4	1
GO:0051147	GO:0051147	regulation of muscle cell differentiation	181/18670	0.0115524	0.0419937	0.018874	ZEB1/YY1	2
GO:0061138	GO:0061138	morphogenesis of a branching epithelium	182/18670	0.0116746	0.0419937	0.018874	WT1/SNAI2	2
GO:0002829	GO:0002829	negative regulation of type 2 immune response	13/18670	0.0117765	0.0419937	0.018874	BCL6	1
GO:0010839	GO:0010839	negative regulation of keratinocyte proliferation	13/18670	0.0117765	0.0419937	0.018874	SNAI2	1
GO:0014745	GO:0014745	negative regulation of muscle adaptation	13/18670	0.0117765	0.0419937	0.018874	KLF4	1
GO:0045602	GO:0045602	negative regulation of endothelial cell differentiation	13/18670	0.0117765	0.0419937	0.018874	ZEB1	1
GO:0050722	GO:0050722	regulation of interleukin-1 beta biosynthetic process	13/18670	0.0117765	0.0419937	0.018874	EGR1	1
GO:0050872	GO:0050872	white fat cell differentiation	13/18670	0.0117765	0.0419937	0.018874	SNAI2	1
GO:0061052	GO:0061052	negative regulation of cell growth involved in cardiac muscle cell development	13/18670	0.0117765	0.0419937	0.018874	YY1	1
GO:0090713	GO:0090713	immunological memory process	13/18670	0.0117765	0.0419937	0.018874	BCL6	1
GO:1902894	GO:1902894	negative regulation of pri-miRNA transcription by RNA polymerase II	13/18670	0.0117765	0.0419937	0.018874	YY1	1
GO:1902947	GO:1902947	regulation of tau-protein kinase activity	13/18670	0.0117765	0.0419937	0.018874	EGR1	1
GO:2000194	GO:2000194	regulation of female gonad development	13/18670	0.0117765	0.0419937	0.018874	WT1	1
GO:0002040	GO:0002040	sprouting angiogenesis	183/18670	0.0117973	0.0419937	0.018874	KLF4/KLF2	2
GO:0048639	GO:0048639	positive regulation of developmental growth	184/18670	0.0119206	0.0422925	0.0190083	WT1/GLI1	2
GO:0007369	GO:0007369	gastrulation	185/18670	0.0120444	0.0425913	0.0191426	KLF4/SNAI1	2
GO:0020027	GO:0020027	hemoglobin metabolic process	14/18670	0.0126769	0.043539	0.0195686	KLF4	1
GO:0032688	GO:0032688	negative regulation of interferon-beta production	14/18670	0.0126769	0.043539	0.0195686	YY1	1
GO:0043455	GO:0043455	regulation of secondary metabolic process	14/18670	0.0126769	0.043539	0.0195686	ZEB2	1
GO:0045064	GO:0045064	T-helper 2 cell differentiation	14/18670	0.0126769	0.043539	0.0195686	BCL6	1
GO:0045591	GO:0045591	positive regulation of regulatory T cell differentiation	14/18670	0.0126769	0.043539	0.0195686	BCL6	1
GO:0050720	GO:0050720	interleukin-1 beta biosynthetic process	14/18670	0.0126769	0.043539	0.0195686	EGR1	1
GO:0060911	GO:0060911	cardiac cell fate commitment	14/18670	0.0126769	0.043539	0.0195686	WT1	1
GO:0072567	GO:0072567	chemokine (C-X-C motif) ligand 2 production	14/18670	0.0126769	0.043539	0.0195686	KLF4	1
GO:2000345	GO:2000345	regulation of hepatocyte proliferation	14/18670	0.0126769	0.043539	0.0195686	GLI1	1
GO:1901654	GO:1901654	response to ketone	193/18670	0.0130558	0.0439604	0.019758	KLF4/KLF2	2
GO:2000377	GO:2000377	regulation of reactive oxygen species metabolic process	195/18670	0.0133143	0.0439604	0.019758	KLF4/KLF2	2
GO:0001763	GO:0001763	morphogenesis of a branching structure	196/18670	0.0134444	0.0439604	0.019758	WT1/SNAI2	2
GO:0001829	GO:0001829	trophectodermal cell differentiation	15/18670	0.0135766	0.0439604	0.019758	SP3	1
GO:0002467	GO:0002467	germinal center formation	15/18670	0.0135766	0.0439604	0.019758	BCL6	1
GO:0007351	GO:0007351	tripartite regional subdivision	15/18670	0.0135766	0.0439604	0.019758	WT1	1
GO:0008595	GO:0008595	anterior/posterior axis specification, embryo	15/18670	0.0135766	0.0439604	0.019758	WT1	1
GO:0032105	GO:0032105	negative regulation of response to extracellular stimulus	15/18670	0.0135766	0.0439604	0.019758	SNAI2	1
GO:0032108	GO:0032108	negative regulation of response to nutrient levels	15/18670	0.0135766	0.0439604	0.019758	SNAI2	1
GO:0032352	GO:0032352	positive regulation of hormone metabolic process	15/18670	0.0135766	0.0439604	0.019758	EGR1	1
GO:0043249	GO:0043249	erythrocyte maturation	15/18670	0.0135766	0.0439604	0.019758	KLF2	1
GO:0043517	GO:0043517	positive regulation of DNA damage response, signal transduction by p53 class mediator	15/18670	0.0135766	0.0439604	0.019758	HIC1	1
GO:0045073	GO:0045073	regulation of chemokine biosynthetic process	15/18670	0.0135766	0.0439604	0.019758	EGR1	1
GO:0045360	GO:0045360	regulation of interleukin-1 biosynthetic process	15/18670	0.0135766	0.0439604	0.019758	EGR1	1
GO:0045475	GO:0045475	locomotor rhythm	15/18670	0.0135766	0.0439604	0.019758	EGR1	1
GO:0048070	GO:0048070	regulation of developmental pigmentation	15/18670	0.0135766	0.0439604	0.019758	ZEB2	1
GO:0048569	GO:0048569	post-embryonic animal organ development	15/18670	0.0135766	0.0439604	0.019758	KLF4	1
GO:0072075	GO:0072075	metanephric mesenchyme development	15/18670	0.0135766	0.0439604	0.019758	WT1	1
GO:1902969	GO:1902969	mitotic DNA replication	15/18670	0.0135766	0.0439604	0.019758	BCL6	1
GO:0031099	GO:0031099	regeneration	198/18670	0.0137063	0.044247	0.0198868	KLF4/GLI1	2
GO:1902806	GO:1902806	regulation of cell cycle G1/S phase transition	202/18670	0.0142367	0.0450669	0.0202553	KLF4/GLI1	2
GO:0030278	GO:0030278	regulation of ossification	203/18670	0.0143707	0.0450669	0.0202553	GLI1/SNAI2	2
GO:0010225	GO:0010225	response to UV-C	16/18670	0.0144755	0.0450669	0.0202553	YY1	1
GO:0010566	GO:0010566	regulation of ketone biosynthetic process	16/18670	0.0144755	0.0450669	0.0202553	EGR1	1
GO:0014067	GO:0014067	negative regulation of phosphatidylinositol 3-kinase signaling	16/18670	0.0144755	0.0450669	0.0202553	KLF4	1
GO:0022038	GO:0022038	corpus callosum development	16/18670	0.0144755	0.0450669	0.0202553	ZEB2	1
GO:0042033	GO:0042033	chemokine biosynthetic process	16/18670	0.0144755	0.0450669	0.0202553	EGR1	1
GO:0042222	GO:0042222	interleukin-1 biosynthetic process	16/18670	0.0144755	0.0450669	0.0202553	EGR1	1
GO:0042448	GO:0042448	progesterone metabolic process	16/18670	0.0144755	0.0450669	0.0202553	EGR1	1
GO:0044849	GO:0044849	estrous cycle	16/18670	0.0144755	0.0450669	0.0202553	EGR1	1
GO:0045623	GO:0045623	negative regulation of T-helper cell differentiation	16/18670	0.0144755	0.0450669	0.0202553	BCL6	1
GO:0050755	GO:0050755	chemokine metabolic process	16/18670	0.0144755	0.0450669	0.0202553	EGR1	1
GO:0006473	GO:0006473	protein acetylation	204/18670	0.0145053	0.0450669	0.0202553	SNAI2/CTCF	2
GO:0016584	GO:0016584	nucleosome positioning	17/18670	0.0153737	0.0469508	0.021102	CTCF	1
GO:0033262	GO:0033262	regulation of nuclear cell cycle DNA replication	17/18670	0.0153737	0.0469508	0.021102	BCL6	1
GO:0061318	GO:0061318	renal filtration cell differentiation	17/18670	0.0153737	0.0469508	0.021102	WT1	1
GO:0072112	GO:0072112	glomerular visceral epithelial cell differentiation	17/18670	0.0153737	0.0469508	0.021102	WT1	1
GO:0090185	GO:0090185	negative regulation of kidney development	17/18670	0.0153737	0.0469508	0.021102	WT1	1
GO:2000811	GO:2000811	negative regulation of anoikis	17/18670	0.0153737	0.0469508	0.021102	SNAI2	1
GO:0002902	GO:0002902	regulation of B cell apoptotic process	18/18670	0.016271	0.0485871	0.0218375	BCL6	1
GO:0006349	GO:0006349	regulation of gene expression by genetic imprinting	18/18670	0.016271	0.0485871	0.0218375	CTCF	1
GO:0031065	GO:0031065	positive regulation of histone deacetylation	18/18670	0.016271	0.0485871	0.0218375	BCL6	1
GO:0071371	GO:0071371	cellular response to gonadotropin stimulus	18/18670	0.016271	0.0485871	0.0218375	WT1	1
GO:0072311	GO:0072311	glomerular epithelial cell differentiation	18/18670	0.016271	0.0485871	0.0218375	WT1	1
GO:0072574	GO:0072574	hepatocyte proliferation	18/18670	0.016271	0.0485871	0.0218375	GLI1	1
GO:0072575	GO:0072575	epithelial cell proliferation involved in liver morphogenesis	18/18670	0.016271	0.0485871	0.0218375	GLI1	1
GO:2000647	GO:2000647	negative regulation of stem cell proliferation	18/18670	0.016271	0.0485871	0.0218375	SNAI2	1
GO:0045444	GO:0045444	fat cell differentiation	223/18670	0.0171657	0.049879	0.0224181	KLF4/SNAI2	2
GO:0001710	GO:0001710	mesodermal cell fate commitment	19/18670	0.0171676	0.049879	0.0224181	KLF4	1
GO:0007350	GO:0007350	blastoderm segmentation	19/18670	0.0171676	0.049879	0.0224181	WT1	1
GO:0042693	GO:0042693	muscle cell fate commitment	19/18670	0.0171676	0.049879	0.0224181	WT1	1
GO:0045414	GO:0045414	regulation of interleukin-8 biosynthetic process	19/18670	0.0171676	0.049879	0.0224181	KLF4	1
GO:0060231	GO:0060231	mesenchymal to epithelial transition	19/18670	0.0171676	0.049879	0.0224181	WT1	1
GO:0060973	GO:0060973	cell migration involved in heart development	19/18670	0.0171676	0.049879	0.0224181	SNAI2	1
GO:0072074	GO:0072074	kidney mesenchyme development	19/18670	0.0171676	0.049879	0.0224181	WT1	1
GO:0072576	GO:0072576	liver morphogenesis	19/18670	0.0171676	0.049879	0.0224181	GLI1	1
GO:1905939	GO:1905939	regulation of gonad development	19/18670	0.0171676	0.049879	0.0224181	WT1	1
