# Supplementary figures and images for: A New Strategy for the Old Challenge of Thalidomide: Systems Biology Prioritization of Potential Immunomodulatory Drug (IMiD)-Targeted Transcription Factors
Source: MDPI journal article supplement (doi:10.3390/ijms241411515), 2023-07-15

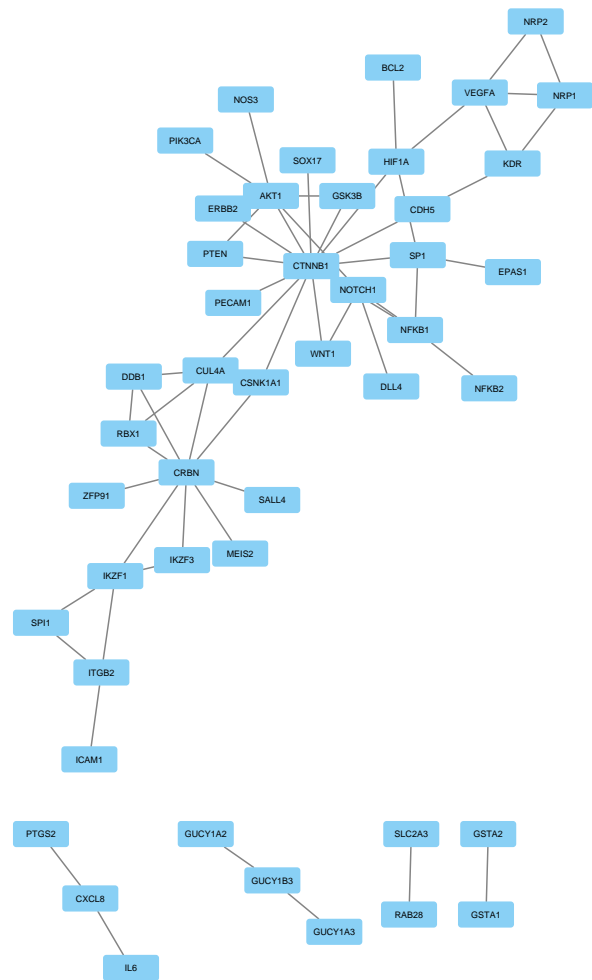

Supplement: s1 [file s1]
